# Supplementary material for: Rhodium-catalyzed cycloisomerization of ester-tethered 1,6-diynes with cyclopropanol moiety leading to tetralone/exocyclic diene hybrid molecules
Source: Royal Society of Chemistry journal article supplement (doi:10.1039/d0cc05429a), 2020-01-01

**Rhodium-catalyzed cycloisomerization of ester-tethered 1,6-diynes with cyclopropanol moiety  
leading to tetralone/exocyclic diene hybrid molecules**

Takeshi Yasui,\* Tomohiro Kikuchi, and Yoshihiko Yamamoto\*

*Department of Basic Medicinal Sciences, Graduate School of Pharmaceutical Sciences, Nagoya  
University, Furo-cho Chikusa, Nagoya 464-8603, Japan*

t-yasui@ps.nagoya-u.ac.jp, yamamoto-yoshi@ps.nagoya-u.ac.jp

**Supporting Information**

**Table of Contents**

|                                                                                               |     |
|-----------------------------------------------------------------------------------------------|-----|
| 1. Optimization of Reaction Conditions                                                        | S2  |
| 2. General Information                                                                        | S4  |
| 3. Synthesis and Characterization of 1,6-Diynes <b>1</b>                                      | S4  |
| 4. Representative Procedure for the Rhodium-Catalyzed Cycloisomerization of <b>1</b>          | S27 |
| 5. Characterization of Exocyclic Dienes <b>2</b> and <b>3</b>                                 | S30 |
| 6. Determination of Structures of <b>2m</b> , <b>2n</b> , <b>3n</b> , and <b>3o</b>           | S37 |
| 7. Control Experiments                                                                        | S41 |
| 8. Variable-Temperature <sup>1</sup> H NMR Spectroscopy of <b>2j</b>                          | S43 |
| 9. X-Ray Diffraction Analysis of <b>2a</b> , <b>2e</b> , <b>2j</b> , <b>2o</b> , and <b>7</b> | S44 |
| 10. DFT calculations                                                                          | S49 |
| 11. References                                                                                | S54 |
| 12. NMR Spectra                                                                               | S56 |

### 1. Optimization of Reaction Conditions

Despite of the high conversions, the isolated yields of **2a** were relatively low (entries 4–8 in Table S1) and any noticeable side products were not observed by <sup>1</sup>H NMR analyses of the crude materials. TLC analysis of the reaction showed tailing stains on the bottom of the TLC plate, which suggests that intermolecular side reactions may provide a complex mixture including oligomers.

**Table S1** Screening of ligands<sup>a</sup>

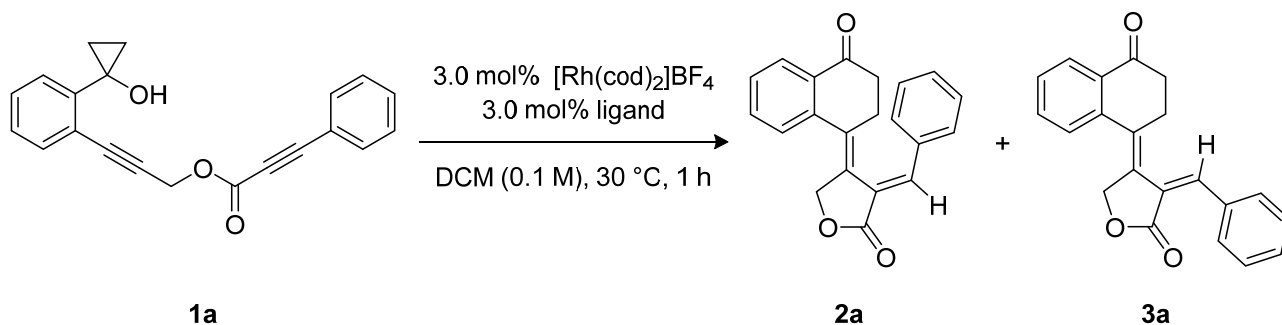

| entry          | ligand                | conv. (%) | yield (%) <sup>b</sup> | ratio of <b>2a:3a</b> |
|----------------|-----------------------|-----------|------------------------|-----------------------|
| 1              | PPh <sub>3</sub>      | 8         | -                      | -                     |
| 2 <sup>c</sup> | dppp                  | 13        | -                      | -                     |
| 3              | dppb                  | 8         | -                      | -                     |
| 4              | BINAP                 | >99       | 49 (47)                | >99:1                 |
| 5              | Tol-BINAP             | 94        | 39                     | >99:1                 |
| 6              | H <sub>8</sub> -BINAP | 96        | 46                     | >99:1                 |
| 7              | SEGPHOS               | 98        | 47                     | >99:1                 |
| 8              | DTBM-SEGPHOS          | 75        | 11                     | >99:1                 |
| 9              | Me-Duphos             | 32        | -                      | -                     |
| 10             | Ph-BPE                | 36        | 3                      | >99:1                 |
| 11             | Xantphos              | 42        | 2                      | >99:1                 |

<sup>a</sup>Pre-activation of the rhodium catalyst was performed under H<sub>2</sub> atmosphere before addition of substrate **1a** to the reaction mixture.

<sup>b</sup>Isolated yield is shown in parenthesis. <sup>c</sup>6.0 mol% PPh<sub>3</sub> was used.

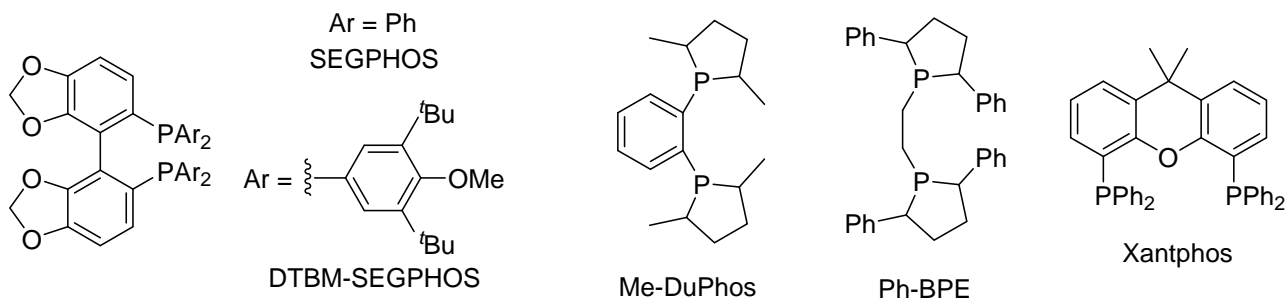

**Table S2** Screening of counterions<sup>a</sup>
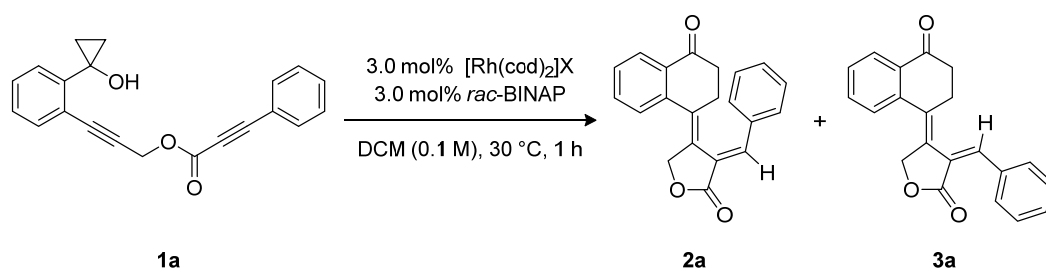

| entry          | X                | conv. (%) | NMR yield (%) <sup>b</sup> | ratio of <b>2a</b> : <b>3a</b> |
|----------------|------------------|-----------|----------------------------|--------------------------------|
| 1              | BF <sub>4</sub>  | >99       | 49 (47)                    | >99:1                          |
| 2              | PF <sub>6</sub>  | 92        | 40                         | >99:1                          |
| 3 <sup>c</sup> | BAr <sup>F</sup> | 66        | 14                         | >99:1                          |
| 4              | OTf              | 66        | 13                         | >99:1                          |
| 5              | ClO <sub>4</sub> | 92        | 47                         | >99:1                          |

<sup>a</sup>Pre-activation of the rhodium catalyst was performed under H<sub>2</sub> atmosphere before addition of substrate **9a** to the reaction mixture.<sup>b</sup>Isolated yield is shown in parenthesis. <sup>c</sup>BAr<sup>F</sup> = B(C<sub>6</sub>H<sub>3</sub>-3,5-(CF<sub>3</sub>)<sub>2</sub>)<sub>4</sub>**Table S3** Optimization of other conditions<sup>a</sup>
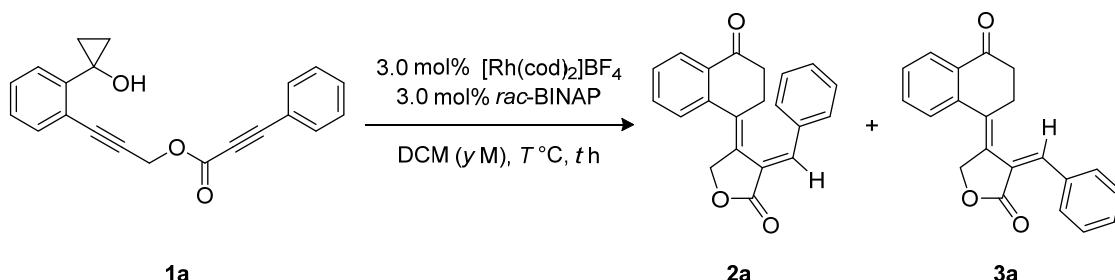

| entry          | γ (M) | T (°C) | t (h) | conv. (%) | yield (%) <sup>b</sup> | ratio of <b>2a</b> : <b>3a</b> |
|----------------|-------|--------|-------|-----------|------------------------|--------------------------------|
| 1              | 0.1   | 20     | 3     | 92        | 47                     | >99:1                          |
| 2              | 0.05  | 20     | 3     | 91        | 62                     | >99:1                          |
| 3              | 0.05  | 30     | 1     | >99       | 70                     | >99:1                          |
| 4              | 0.02  | 30     | 1     | 81        | 27                     | >99:1                          |
| 5 <sup>c</sup> | 0.05  | 30     | 1     | 40        | 15                     | >99:1                          |
| 6 <sup>d</sup> | 0.05  | 30     | 1     | 44        | 14                     | >99:1                          |

<sup>a</sup>Pre-activation of the rhodium catalyst was performed under H<sub>2</sub> atmosphere before addition of substrate **1a** to the reaction mixture.<sup>b</sup>Isolated yield. <sup>c</sup>AcOH (5 mol%) was used as an additive. <sup>d</sup>p-TsOH (5 mol%) was used as an additive.

## 2. General information

**General considerations:** All air- and moisture-sensitive reactions were performed under an argon (Ar) atmosphere. Analytical thin layer chromatography was performed using 0.25 mm silica gel plate (Merck TLC Silica gel 60 F<sub>254</sub>). Column chromatography was performed on silica gel (Cica silica gel 60N) with solvents specified below. Melting points were recorded on SRS OptiMelt MPA100. NMR spectra were recorded on JEOL ESC-400 spectrometer (<sup>1</sup>H/400 MHz and <sup>13</sup>C/101 MHz) for samples in CDCl<sub>3</sub> solutions at 25 °C. <sup>1</sup>H NMR chemical shifts are reported in terms of chemical shift (δ, ppm) relative to the signal at δ 0.00 ppm for internal tetramethylsilane. <sup>13</sup>C NMR spectra were fully decoupled and are reported in terms of chemical shift (δ, ppm) relative to the triplet at δ 77.0 ppm for CDCl<sub>3</sub>. <sup>19</sup>F NMR spectra are reported in terms of chemical shift (δ, ppm) relative to the singlet at d −63.7 ppm for α,α,α-trifluorotoluene as an external standard. Splitting patterns are designated as follows: s, singlet; d, doublet; t, triplet; q, quartet; quint, quintet; sext, sextet; sept, septet; m, multiplet. Coupling constants are reported in Hz. Infrared spectra were recorded on JASCO FT/IR-230 spectrometer. High-resolution mass spectra were recorded on JEOL JMS-T100LP mass spectrometer.

**Reagents and Solvents:** [RhOH(cod)]<sub>2</sub>,<sup>1</sup> [Cp\*RuCl<sub>2</sub>]<sub>2</sub>,<sup>2</sup> [Ir(cod)Cl]<sub>2</sub>,<sup>3</sup> [Rh(cod)<sub>2</sub>]BF<sub>4</sub>,<sup>4</sup> [Rh(cod)<sub>2</sub>]PF<sub>6</sub>,<sup>4</sup> [Rh(cod)<sub>2</sub>]BAR<sup>F</sup>,<sup>5</sup> [Rh(cod)<sub>2</sub>]OTf<sup>4</sup> and [Rh(cod)<sub>2</sub>]ClO<sub>4</sub>,<sup>4</sup> PdCl<sub>2</sub>(PPh<sub>3</sub>)<sub>2</sub>,<sup>5</sup> were prepared according to the report. *rac*-BINAP was purchased from Aldrich and used after recrystallization from toluene and EtOH. dry DCM was distilled from calcium hydride under Ar atmosphere and stored over 4 Å molecular sieves. Other solvents and reagents were purchased from chemical suppliers (Aldrich, Kanto Chemical, TCI, and Wako) and used as received.

## 3. Synthesis and Characterization of 1,6-Diynes 1

### Synthesis of intermediate S5

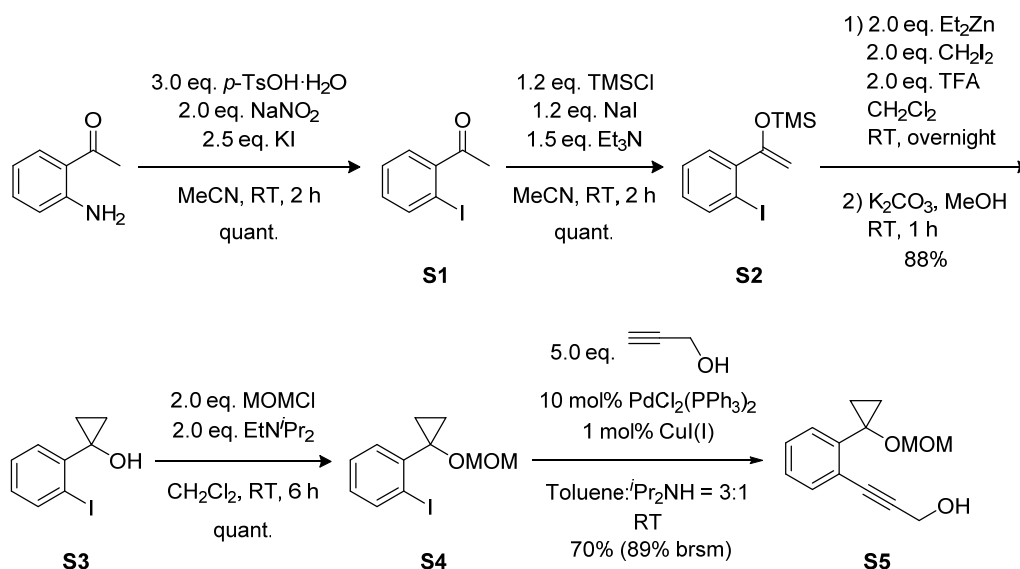



### Synthesis and characterization of S1 and S2

**S1**<sup>6</sup> and **S2**<sup>7,8</sup> were prepared according to the previous reports.

### Synthesis and characterization of S3

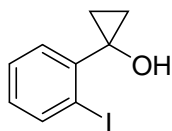

**S3**

To a dried 500 mL two-necked flask was added degassed dry DCM (120 mL) and Et<sub>2</sub>Zn (40 mL, 1.07 M in hexane) under Ar. The solution was cooled to -10 °C and a solution of TFA (3.30 mL, 43.0 mmol) in degassed dry DCM (20 mL) was then dripped into the reaction mixture for 1 h (*very slowly*). On stirring for additional 1 h, a solution of CH<sub>2</sub>I<sub>2</sub> (3.70 mL, 43.0 mmol) in degassed dry DCM (20 mL) was added to the reaction mixture for 1 h (*very slowly*). After stirring at rt for 3 h, **S2** (6.85 g, 21.5 mmol) was added to the mixture. The reaction mixture was stirred at rt overnight. The reaction was quenched with saturated aqueous NH<sub>4</sub>Cl and extracted with hexane. The organic layer was washed with sat. aq. NaHCO<sub>3</sub>, dried over MgSO<sub>4</sub>, and concentrated in vacuo. To a MeOH solution (50 mL) of the crude material in a 200 mL flask was added K<sub>2</sub>CO<sub>3</sub> (2.97 mg, 21.5 mmol) at rt. After being stirred for 1 h, the reaction mixture was diluted with water and extracted with EtOAc. The organic layer was washed with brine, dried over MgSO<sub>4</sub>, and concentrated. The residue was purified by a silica gel column chromatography (Hexane/EtOAc = 40:1) to furnish **S3** (4.95 g, 88%) as a pale-yellow solid. **Analytical data for S3:** pale-yellow solid (mp 52.4–52.8 °C); <sup>1</sup>H-NMR (400 MHz, CDCl<sub>3</sub>) δ 7.86 (d, *J* = 7.8 Hz, 1H), 7.37 (dd, *J* = 7.5, 1.6 Hz, 1H), 7.31 (t, *J* = 7.5 Hz, 1H), 7.00 (dt, *J* = 7.8, 1.6 Hz, 1H), 2.99 (s, 1H), 1.29 (dd, *J* = 7.5, 5.3 Hz, 2H), 0.98 (dd, *J* = 7.5, 5.3 Hz, 2H); <sup>13</sup>C-NMR (101 MHz, CHCl<sub>3</sub>) δ 143.9, 139.7, 131.0, 129.8, 128.4, 100.9, 61.0, 15.6; IR (neat) 3315 cm<sup>-1</sup>; HRMS (DART) *m/z* [M+ NH<sub>4</sub>]<sup>+</sup> calcd for C<sub>9</sub>H<sub>9</sub>O<sub>3</sub>I•NH<sub>4</sub> 278.0042, found 278.0050.

### Synthesis and characterization of S4

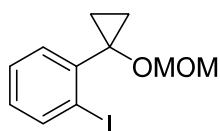

**S4**

To a solution of **S3** (5.25 g, 20.2 mmol) and EtN<sup>i</sup>Pr<sub>2</sub> (7.0 mL, 40.4 mmol) in dry DCM (40 mL) was added MOMCl (3.0 mL, 40.4 mmol) at 0 °C, and the mixture was allowed to warm to rt. After being stirred at rt for 5 h, the reaction was quenched with water and extracted with EtOAc. The organic layer was washed with brine, dried over MgSO<sub>4</sub>, and concentrated. The residue was purified by silica gel column chromatography (Hexane/EtOAc = 20:1) to furnish **S4** (5.96 g, quant.) as a yellow oil. **Analytical data for S4:** <sup>1</sup>H-NMR (400 MHz, CDCl<sub>3</sub>) δ 7.91 (d, *J* = 7.4 Hz, 1H), 7.35–7.27 (m, 2H), 7.00 (dt, *J* = 7.4, 1.7 Hz, 1H), 4.61 (s, 2H), 3.17 (s, 3H), 1.34 (dd, *J* = 7.1, 5.7 Hz, 2H), 0.98 (dd, *J* = 7.1, 5.7 Hz, 2H); <sup>13</sup>C-NMR (101 MHz, CHCl<sub>3</sub>) δ 141.9, 140.1, 132.2, 129.7, 127.6, 101.5, 95.2, 65.0, 55.8, 14.0; IR (neat) 1034 cm<sup>-1</sup>; HRMS (DART) *m/z* [M+ NH<sub>4</sub>]<sup>+</sup> calcd for C<sub>11</sub>H<sub>13</sub>IO<sub>2</sub>•NH<sub>4</sub> 322.0304, found 322.0295.

## Synthesis and characterization of S5

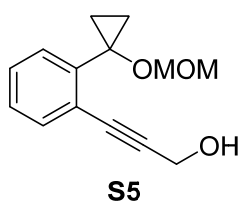

To a solution of **S4** (3.37 g, 11.1 mmol) in *i*Pr<sub>2</sub>NH (6.0 mL) and toluene (19 mL) was added PdCl<sub>2</sub>(PPh<sub>3</sub>)<sub>2</sub> (772 mg, 1.11 mmol) and CuI (20.9 mg, 0.110 mmol). After degassed at -78 °C, the reaction mixture was warmed to room temperature. To the stirred solution was added a solution of propargyl alcohol (930 mg, 16.6 mmol) in *i*Pr<sub>2</sub>NH (6.0 mL) and toluene (19 mL) over 1 h. Insoluble materials were filtered off

through a pad of Celite<sup>®</sup>, and the filtrate was concentrated *in vacuo*. The obtained crude product was purified by silica gel column chromatography (Hexane/EtOAc = 10:1) to give **S5** (1.45 g, 70%) as a brown oil.

**Analytical data for S5:** <sup>1</sup>H-NMR (400 MHz, CDCl<sub>3</sub>) δ 7.48 (d, *J* = 7.3 Hz, 1H), 7.43 (d, *J* = 7.3 Hz, 1H), 7.33–7.24 (m, 2H), 4.70 (s, 2H), 4.51 (d, *J* = 5.5 Hz, 2H), 3.24 (s, 3H), 2.63 (t, *J* = 5.5 Hz, 1H), 1.29 (dd, *J* = 7.3, 5.5 Hz, 2H), 1.00 (dd, *J* = 7.3, 5.5 Hz, 2H); <sup>13</sup>C-NMR (101 MHz, CHCl<sub>3</sub>) δ 141.7, 132.3, 131.2, 128.4, 128.0, 124.4, 94.7, 92.5, 84.7, 61.2, 55.6, 51.7, 13.1; IR (neat) 3402, 1030 cm<sup>-1</sup>; HRMS (DART) *m/z* [M+NH<sub>4</sub>]<sup>+</sup> calcd for C<sub>14</sub>H<sub>16</sub>O<sub>3</sub>•NH<sub>4</sub> 250.1443, found 250.1418.

## Representative procedure: synthesis of 1a–f and 1h–l.

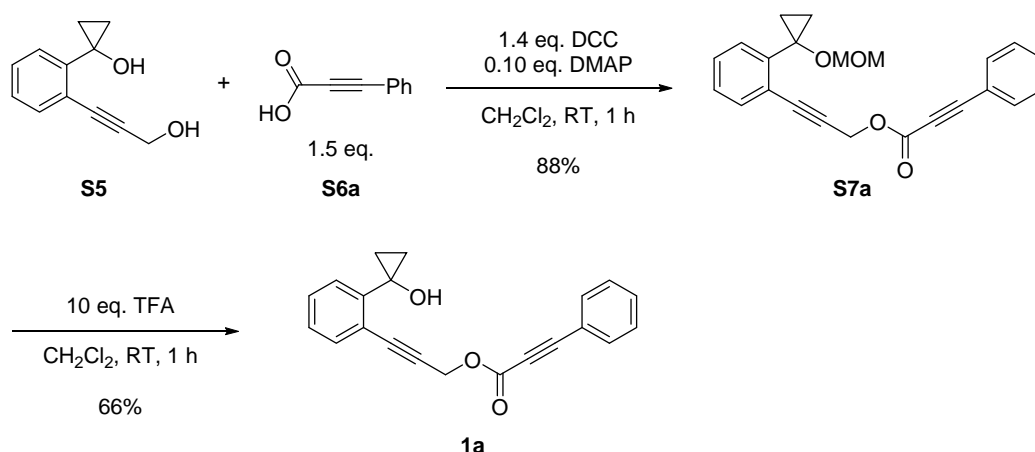

## Synthesis and characterization of S6b–d, S6f–h

Compounds **S6b–d**<sup>9</sup>, **S6e**<sup>10</sup>, **S6f**<sup>9</sup>, **S6i**<sup>11</sup>, **S6j**<sup>12</sup> and **S6k**<sup>13</sup> were synthesized as reported.

## Synthesis and characterization of S7a

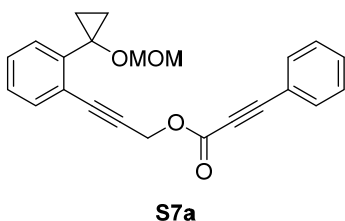

To a 50 mL flask was charged with **S5** (348 mg, 1.50 mmol), phenylpropionic acid **S6a** (329 mg, 2.25 mmol) and DMAP (18.3 mg, 0.150 mmol). To the mixture was added a DCM (20 mL) solution of DCC (433 mg, 2.10 mmol) at 0 °C, and the resulting solution was stirred at room temperature for 1 h. After that, the reaction mixture was filtered through a pad of Celite<sup>®</sup> with EtOAc.

The filtrate was washed with water, sat. aq. NaHCO<sub>3</sub> and brine. The solution was dried over MgSO<sub>4</sub>, and concentrated *in vacuo*. The residue was purified by silica gel column chromatography (Hexane/EtOAc = 20:1) to furnish **S7a** (476 mg, 88%) as an orange gum. **Analytical data for S7a:** <sup>1</sup>H-NMR (400 MHz, CDCl<sub>3</sub>) δ 7.61 (dd, *J* = 8.2, 1.4 Hz, 2H), 7.51–7.44 (m, 3H), 7.41–7.37 (m, 2H), 7.31–7.26 (m, 2H), 5.12 (s, 2H), 4.66 (s, 2H),

3.17 (s, 3H), 1.29 (dd,  $J = 7.2, 5.6$  Hz, 2H), 1.00 (dd,  $J = 7.2, 5.6$  Hz, 2H);  $^{13}\text{C}$ -NMR (101 MHz,  $\text{CHCl}_3$ )  $\delta$  153.4, 142.2, 133.2, 131.0, 130.7, 128.7, 128.7, 127.9, 123.5, 119.5, 95.2, 87.3, 86.7, 86.1, 80.2, 61.5, 55.6, 54.4, 13.0; IR (neat) 2356, 2220, 1714, 1164  $\text{cm}^{-1}$ ; HRMS (DART)  $m/z$   $[\text{M}^+ \text{NH}_4]^+$  calcd for  $\text{C}_{23}\text{H}_{20}\text{O}_4 \cdot \text{NH}_4$  378.1705, found 378.1705

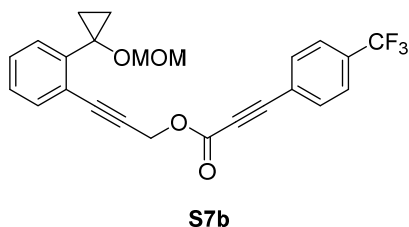

**Analytical data for S7b:** orange gum;  $^1\text{H}$ -NMR (400 MHz,  $\text{CDCl}_3$ )  $\delta$  7.72 (d,  $J = 8.2$  Hz, 2H), 7.66 (d,  $J = 8.2$  Hz, 2H), 7.50 (dd,  $J = 7.8, 1.5$  Hz, 1H), 7.45 (dd,  $J = 7.8, 1.3$  Hz, 1H), 7.32 (dt,  $J = 7.8, 1.5$  Hz, 1H), 7.26 (dt,  $J = 7.8, 1.3$  Hz, 3H), 5.14 (s, 2H), 4.65 (s, 2H), 3.17 (s, 3H), 1.28 (dd,  $J = 7.3, 5.5$  Hz, 2H), 1.00 (dd,  $J = 7.3, 5.5$  Hz, 2H);  $^{13}\text{C}$ -NMR (101 MHz,  $\text{CHCl}_3$ )  $\delta$  153.0, 142.2, 133.3, 133.2, 130.7, 128.7, 127.9, 125.7, 125.7, 123.4, 123.3, 95.2, 86.3, 85.0, 81.7, 61.5, 55.6, 54.7, 13.0;  $^{19}\text{F}$ -NMR (376 MHz,  $\text{CDCl}_3$ )  $\delta$  -64.1; IR (neat) 2227, 1720, 1171  $\text{cm}^{-1}$ ; HRMS (DART)  $m/z$   $[\text{M}^+ \text{NH}_4]^+$  calcd for  $\text{C}_{24}\text{H}_{19}\text{F}_3\text{O}_4 \cdot \text{NH}_4$  446.1579, found 446.1584

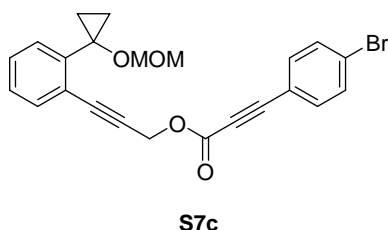

**Analytical data for S7c:** orange gum;  $^1\text{H}$ -NMR (400 MHz,  $\text{CDCl}_3$ )  $\delta$  7.54 (d,  $J = 8.2$  Hz, 2H), 7.50–7.44 (m, 4H), 7.33–7.29 (m, 1H), 7.28–7.24 (m, 1H), 5.12 (s, 2H), 4.65 (s, 2H), 3.16 (s, 3H), 1.28 (dd,  $J = 7.3, 5.5$  Hz, 2H), 1.00 (dd,  $J = 7.3, 5.5$  Hz, 2H);  $^{13}\text{C}$ -NMR (101 MHz,  $\text{CDCl}_3$ )  $\delta$  153.2, 142.2, 134.4, 133.2, 132.1, 130.7, 128.7, 127.9, 125.8, 123.5, 118.4, 95.2, 86.4, 86.2, 86.1, 81.1, 61.5, 55.6, 54.6, 13.0; IR (neat) 2343, 2222, 1716, 1162  $\text{cm}^{-1}$ ; HRMS (DART)  $m/z$   $[\text{M}^+ \text{NH}_4]^+$  calcd for  $\text{C}_{23}\text{H}_{19}\text{BrO}_4 \cdot \text{NH}_4$  456.0811, found 456.0838

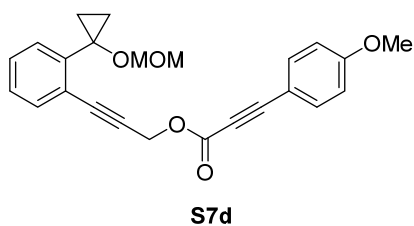

**Analytical data for S7d:** orange gum;  $^1\text{H}$ -NMR (400 MHz,  $\text{CDCl}_3$ )  $\delta$  7.57–7.54 (m, 2H), 7.49 (dd,  $J = 7.5, 1.2$  Hz, 1H), 7.45 (dd,  $J = 7.5, 1.2$  Hz, 1H), 7.31 (dt,  $J = 7.5, 1.2$  Hz, 1H), 7.25 (dt,  $J = 7.5, 1.2$  Hz, 1H), 6.91–6.88 (m, 2H), 5.11 (s, 2H), 4.65 (s, 2H), 3.84 (s, 3H), 3.17 (s, 3H), 1.28 (dd,  $J = 7.1, 5.7$  Hz, 2H), 1.00 (dd,  $J = 7.1, 5.7$  Hz, 2H);  $^{13}\text{C}$ -NMR (101 MHz,  $\text{CDCl}_3$ )  $\delta$  161.8, 153.7, 142.2, 135.2, 133.2, 130.7, 128.6, 127.8, 123.6, 114.4, 111.3, 95.2, 88.3, 86.8, 86.0, 79.7, 61.5, 55.6, 55.5, 54.3, 13.0; IR (neat) 2211, 1710, 1155  $\text{cm}^{-1}$ ; HRMS (DART)  $m/z$   $[\text{M}^+ \text{NH}_4]^+$  calcd for  $\text{C}_{24}\text{H}_{22}\text{O}_5 \cdot \text{NH}_4$  408.1811, found 408.1815

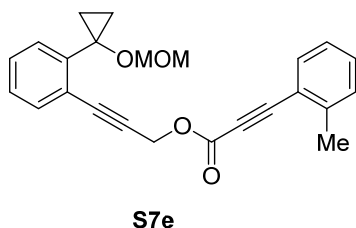

**Analytical data for S7e:** yellow gum;  $^1\text{H}$ -NMR (400 MHz,  $\text{CDCl}_3$ )  $\delta$  7.57–7.55 (m, 1H), 7.50 (dd,  $J = 7.3, 1.8$  Hz, 1H), 7.45 (dd,  $J = 7.6, 1.1$  Hz, 1H), 7.37–7.24 (m, 4H), 7.19 (t,  $J = 7.6$  Hz, 1H), 5.12 (s, 2H), 4.66 (s, 2H), 3.17 (s, 3H), 2.51 (s, 3H), 1.29 (dd,  $J = 7.1, 5.7$  Hz, 2H), 1.00 (dd,  $J = 7.1, 5.7$  Hz, 2H);  $^{13}\text{C}$ -NMR (101 MHz,  $\text{CDCl}_3$ )  $\delta$  153.4, 142.4, 142.3, 133.6, 133.1, 130.9, 130.7, 129.9, 128.6, 127.9, 126.0, 123.5, 119.3, 95.1, 86.9, 86.3, 86.0, 84.0, 61.4, 55.4, 54.3, 20.5, 13.0; IR

(neat) 2216, 1714, 1173  $\text{cm}^{-1}$ ; HRMS (DART)  $m/z$   $[\text{M}^+ \text{NH}_4]^+$  calcd for  $\text{C}_{24}\text{H}_{22}\text{O}_4 \cdot \text{NH}_4$  392.1862, found 392.1889

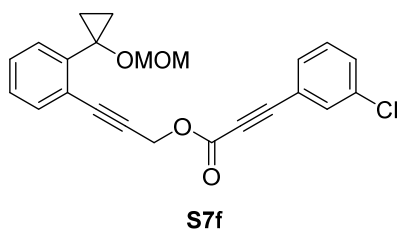

**Analytical data for S7f:** orange gum;  $^1\text{H}$ -NMR (400 MHz,  $\text{CDCl}_3$ )  $\delta$  7.59 (t,  $J = 1.8$  Hz, 1H), 7.51–7.43 (m, 4H), 7.35–7.24 (m, 3H), 5.12 (s, 2H), 4.65 (s, 2H), 3.17 (s, 3H), 1.28 (dd,  $J = 7.3, 5.5$  Hz, 2H), 1.00 (dd,  $J = 7.3, 5.5$  Hz, 2H);  $^{13}\text{C}$ -NMR (101 MHz,  $\text{CDCl}_3$ )  $\delta$  152.9, 142.2, 134.6, 133.1, 132.7, 131.2, 130.7, 130.0, 128.7, 127.9, 123.4, 121.2, 95.1, 86.6, 86.2,

85.2, 81.0, 61.4, 55.5, 54.6, 13.0; IR (neat) 1718, 1172  $\text{cm}^{-1}$ ; HRMS (DART)  $m/z$   $[\text{M}^+ \text{NH}_4]^+$  calcd for  $\text{C}_{23}\text{H}_{19}\text{O}_4\text{Cl} \cdot \text{NH}_4$  412.1316, found 412.1335

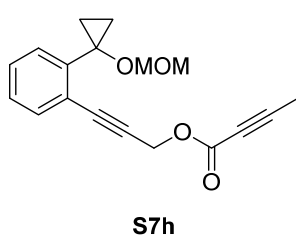

**Analytical data for S7h:** pale yellow gum;  $^1\text{H}$ -NMR (400 MHz,  $\text{CDCl}_3$ )  $\delta$  7.46 (dd,  $J = 7.2, 1.2$  Hz, 1H), 7.43 (dd,  $J = 7.2, 1.2$  Hz, 1H), 7.29 (dt,  $J = 7.2, 1.2$  Hz, 1H), 7.23 (dt,  $J = 7.2, 1.2$  Hz, 1H), 5.02 (s, 2H), 4.63 (s, 2H), 3.15 (s, 3H), 2.00 (s, 3H), 1.25 (dd,  $J = 7.6, 5.3$  Hz, 2H), 0.97 (dd,  $J = 7.6, 5.3$  Hz, 2H);  $^{13}\text{C}$ -NMR (101 MHz,  $\text{CDCl}_3$ )  $\delta$  153.1, 142.1, 133.1, 130.7, 128.6, 127.8, 123.5, 95.2, 86.7, 86.6, 85.9, 72.0, 61.4, 55.6, 54.2, 13.0, 4.0; IR (neat) 2310, 2238, 1716, 1243  $\text{cm}^{-1}$ ;

HRMS (DART)  $m/z$   $[\text{M}^+ \text{NH}_4]^+$  calcd for  $\text{C}_{18}\text{H}_{18}\text{O}_4 \cdot \text{NH}_4$  316.1549, found 316.1539

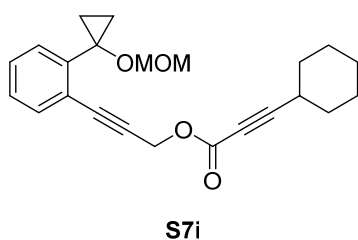

**Analytical data for S7i:** pale yellow gum;  $^1\text{H}$ -NMR (400 MHz,  $\text{CDCl}_3$ )  $\delta$  7.48 (d,  $J = 7.8$  Hz, 1H), 7.44 (d,  $J = 7.3$  Hz, 1H), 7.32–7.28 (m, 1H), 7.26–7.23 (m, 1H), 5.04 (s, 2H), 4.64 (s, 2H), 3.16 (s, 3H), 2.57–2.51 (m, 1H), 1.86–1.83 (m, 2H), 1.73–1.71 (m, 2H), 1.61–1.49 (m, 3H), 1.38–1.31 (m, 3H), 1.27 (dd,  $J = 7.3, 5.5$  Hz, 2H), 0.99 (dd,  $J = 7.3, 5.5$  Hz, 2H);  $^{13}\text{C}$ -NMR (101 MHz,  $\text{CDCl}_3$ )  $\delta$  153.4, 142.1, 133.1, 130.7, 128.6, 127.8, 123.6, 95.2, 94.3,

86.8, 85.8, 72.6, 61.4, 55.6, 54.1, 31.5, 29.0, 25.7, 24.7, 13.0; IR (neat) 2933, 2856, 2364, 2233, 1716, 1234  $\text{cm}^{-1}$ ; HRMS (DART)  $m/z$   $[\text{M}^+ \text{NH}_4]^+$  calcd for  $\text{C}_{23}\text{H}_{26}\text{O}_4 \cdot \text{NH}_4$  384.2174, found 384.2165

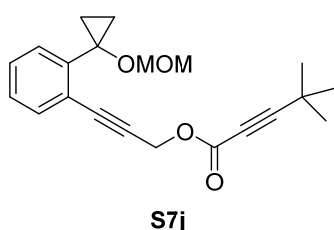

**Analytical data for S7j:** pale yellow gum;  $^1\text{H}$ -NMR (400 MHz,  $\text{CDCl}_3$ )  $\delta$  7.48 (d,  $J = 7.1$  Hz, 1H), 7.44 (d,  $J = 7.1$  Hz, 1H), 7.30 (t,  $J = 7.1$  Hz, 1H), 7.24 (t,  $J = 7.1$  Hz, 1H), 5.04 (s, 2H), 4.64 (s, 2H), 3.17 (s, 3H), 1.30 (s, 9H), 1.26 (dd,  $J = 7.4, 5.4$  Hz, 2H), 0.99 (dd,  $J = 7.4, 5.4$  Hz, 2H);  $^{13}\text{C}$ -NMR (101 MHz,  $\text{CDCl}_3$ )  $\delta$  153.4, 142.1, 133.2, 130.7, 128.6, 127.8, 123.6, 97.8, 95.2, 86.8, 85.8, 71.3, 61.4, 55.6, 54.1, 30.0, 27.7, 13.0; IR (neat) 2971, 2225, 1716, 1211  $\text{cm}^{-1}$ ; HRMS

(DART)  $m/z$   $[\text{M}^+ \text{NH}_4]^+$  calcd for  $\text{C}_{21}\text{H}_{24}\text{O}_4 \cdot \text{NH}_4$  358.2018, found 358.2031

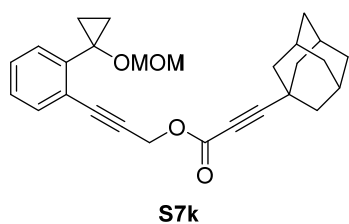

**Analytical data for S7k:** orange gum;  $^1\text{H-NMR}$  (400 MHz,  $\text{CDCl}_3$ )  $\delta$  7.48 (dd,  $J = 7.6, 1.2$  Hz, 1H), 7.44 (dd,  $J = 7.6, 1.2$  Hz, 1H), 7.30 (dt,  $J = 7.6, 1.2$  Hz, 1H), 7.24 (dt,  $J = 7.6, 1.2$  Hz, 1H), 5.03 (s, 2H), 4.64 (s, 2H), 3.16 (s, 3H), 1.99 (br s, 3H), 1.93 (br s, 6H), 1.70 (br s, 6H), 1.27 (dd,  $J = 7.3, 5.5$  Hz, 2H), 0.99 (dd,  $J = 7.3, 5.5$  Hz, 2H);  $^{13}\text{C-NMR}$  (101 MHz,  $\text{CDCl}_3$ )  $\delta$  153.3, 142.1, 133.0, 130.7, 128.6, 127.8, 123.5, 96.9, 95.1, 86.9, 85.7, 71.7, 61.4, 55.4, 53.9, 41.5, 36.1, 29.7, 27.6, 12.9; IR (neat) 2908, 2852, 2227, 1716, 1240  $\text{cm}^{-1}$ ; HRMS (DART)  $m/z$   $[\text{M} + \text{NH}_4]^+$  calcd for  $\text{C}_{27}\text{H}_{30}\text{O}_4 \cdot \text{NH}_4$  436.2488, found 436.2498

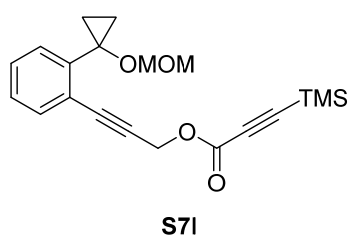

**Analytical data for S7l:** pale yellow gum;  $^1\text{H-NMR}$  (400 MHz,  $\text{CDCl}_3$ )  $\delta$  7.47 (dd,  $J = 7.4, 1.2$  Hz, 1H), 7.44 (dd,  $J = 7.4, 1.2$  Hz, 1H), 7.31 (dt,  $J = 7.4, 1.2$  Hz, 1H), 7.25 (dt,  $J = 7.4, 1.2$  Hz, 1H), 5.05 (s, 2H), 4.64 (s, 2H), 3.16 (s, 3H), 1.27 (dd,  $J = 7.3, 5.5$  Hz, 2H), 0.98 (dd,  $J = 7.3, 5.5$  Hz, 2H), 0.26 (s, 9H);  $^{13}\text{C-NMR}$  (101 MHz,  $\text{CDCl}_3$ )  $\delta$  152.4, 142.2, 133.2, 130.7, 128.7, 127.9, 123.5, 95.4, 95.2, 94.0, 86.4, 86.1, 61.4, 55.6, 54.4, 13.0, -0.8; IR (neat) 1718, 1209  $\text{cm}^{-1}$ ; HRMS (DART)  $m/z$   $[\text{M} + \text{NH}_4]^+$  calcd for  $\text{C}_{20}\text{H}_{24}\text{O}_4\text{Si} \cdot \text{NH}_4$  374.1788, found 374.1774

### Synthesis and characterization of 1a

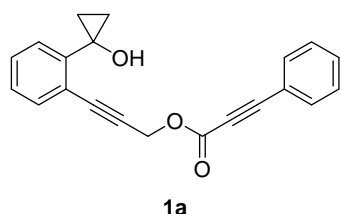

To a 50 mL flask was added **S7a** (360 mg, 1.00 mmol) followed by degassed DCM (10 mL). TFA (0.770 mL, 10.0 mmol) was slowly added to the solution. After being stirred at rt for 1 h under Ar atmosphere, the reaction mixture was diluted with water and extracted with EtOAc. The organic layer was washed with sat. aq.  $\text{NaHCO}_3$  and brine, dried over  $\text{MgSO}_4$ , and concentrated *in vacuo*.

The residue was purified by silica gel column chromatography (Hexane/EtOAc = 10:1) to furnish **1a** (209 mg, 66%) as an orange gum. **Analytical data for 1a:**  $^1\text{H-NMR}$  (400 MHz,  $\text{CDCl}_3$ )  $\delta$  7.60 (dd,  $J = 8.8, 1.6$  Hz, 2H), 7.50–7.45 (m, 2H), 7.40–7.36 (m, 3H), 7.31 (dt,  $J = 7.6, 1.6$  Hz, 1H), 7.25 (dt,  $J = 7.6, 1.2$  Hz, 1H), 5.09 (s, 2H), 3.35 (s, 1H), 1.23 (dd,  $J = 7.2, 5.2$  Hz, 2H), 1.00 (dd,  $J = 7.2, 5.2$  Hz, 2H);  $^{13}\text{C-NMR}$  (101 MHz,  $\text{CDCl}_3$ )  $\delta$  153.7, 145.0, 133.3, 133.0, 131.0, 129.3, 128.7, 128.2, 127.7, 122.2, 119.4, 87.9, 87.4, 86.1, 80.0, 56.9, 54.4, 14.4; IR (neat) 3533, 3403, 2220, 1712, 1166  $\text{cm}^{-1}$ ; HRMS (DART)  $m/z$   $[\text{M} + \text{NH}_4]^+$  calcd for  $\text{C}_{21}\text{H}_{16}\text{O}_3 \cdot \text{NH}_4$  334.1443, found 334.1438

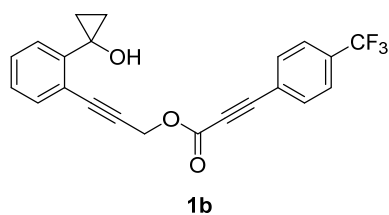

**Analytical data for 1b:** red gum;  $^1\text{H-NMR}$  (400 MHz,  $\text{CDCl}_3$ )  $\delta$  7.72 (d,  $J = 8.2$  Hz, 2H), 7.66 (d,  $J = 8.2$  Hz, 2H), 7.50 (d,  $J = 7.3$  Hz, 1H), 7.36 (d,  $J = 7.3$  Hz, 1H), 7.33 (t,  $J = 7.3$  Hz, 1H), 7.26 (t,  $J = 7.3$  Hz, 1H), 5.09 (s, 2H), 3.28 (br s, 1H), 1.23 (dd,  $J = 7.4, 5.4$  Hz, 2H), 1.00 (dd,  $J = 7.4, 5.4$  Hz, 2H);  $^{13}\text{C-NMR}$  (101 MHz,  $\text{CDCl}_3$ )  $\delta$  153.2, 145.0, 133.4, 133.0, 129.4, 128.2, 127.8, 125.7, 125.7, 125.6, 123.2, 122.1, 87.1, 86.3, 85.5, 81.5, 56.9, 54.6, 14.4;  $^{19}\text{F-NMR}$  (376 MHz,

$\text{CDCl}_3$ )  $\delta$  -64.1; IR (neat) 3536, 3411, 2225, 1716, 1170  $\text{cm}^{-1}$ ; HRMS (DART)  $m/z$   $[\text{M}^+ \text{NH}_4]^+$  calcd for  $\text{C}_{22}\text{H}_{15}\text{F}_3\text{O}_3 \cdot \text{NH}_4$  402.1317, found 402.1299

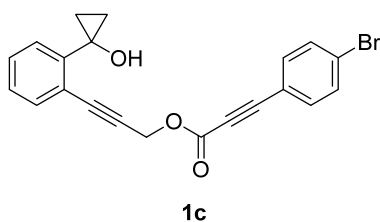

**Analytical data for 1c:** orange gum;  $^1\text{H}$ -NMR (400 MHz,  $\text{CDCl}_3$ )  $\delta$  7.54 (d,  $J$  = 8.2 Hz, 2H), 7.49 (d,  $J$  = 7.6 Hz, 1H), 7.46 (d,  $J$  = 8.2 Hz, 2H), 7.37 (d,  $J$  = 7.3 Hz, 1H), 7.32 (t,  $J$  = 7.3 Hz, 1H), 7.25 (t,  $J$  = 7.6 Hz, 1H), 5.09 (s, 2H), 3.30 (br s, 1H), 1.22 (dd,  $J$  = 7.1, 5.3 Hz, 2H), 1.00 (dd,  $J$  = 7.1, 5.3 Hz, 2H);  $^{13}\text{C}$ -NMR (101 MHz,  $\text{CDCl}_3$ )  $\delta$  153.4, 145.0, 134.5, 133.0, 132.2,

129.3, 128.2, 127.7, 125.9, 122.2, 118.3, 87.3, 86.6, 86.2, 80.9, 56.9, 54.5, 14.4; IR (neat) 3535, 3396, 2322, 2220, 1713, 1167  $\text{cm}^{-1}$ ; HRMS (DART)  $m/z$   $[\text{M}^+ \text{NH}_4]^+$  calcd for  $\text{C}_{21}\text{H}_{15}\text{BrO}_3 \cdot \text{NH}_4$  412.0548, found 412.0558

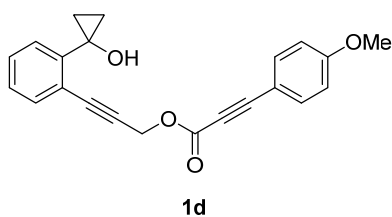

**Analytical data for 1d:** orange gum;  $^1\text{H}$ -NMR (400 MHz,  $\text{CDCl}_3$ )  $\delta$  7.58–7.54 (m, 2H), 7.49 (dd,  $J$  = 7.8, 1.4 Hz, 1H), 7.37 (dd,  $J$  = 7.8, 1.4 Hz, 1H), 7.31 (dt,  $J$  = 7.8, 1.4 Hz, 1H), 7.25 (dt,  $J$  = 7.8, 1.4 Hz, 1H), 6.91–6.88 (m, 2H), 5.08 (s, 2H), 3.84 (s, 3H), 3.37 (s, 1H), 1.22 (dd,  $J$  = 7.1, 5.3 Hz, 2H), 0.99 (dd,  $J$  = 7.1, 5.3 Hz, 2H);  $^{13}\text{C}$ -NMR (101 MHz,  $\text{CDCl}_3$ )  $\delta$  161.9, 153.9,

145.1, 135.3, 132.9, 129.2, 128.2, 127.7, 122.3, 114.4, 111.1, 88.9, 87.6, 86.0, 79.5, 56.9, 55.5, 54.2, 14.4; IR (neat) 3515, 1743  $\text{cm}^{-1}$ ; HRMS (DART)  $m/z$   $[\text{M}+\text{H}]^+$  calcd for  $\text{C}_{22}\text{H}_{18}\text{O}_4 \cdot \text{H}$  347.1283, found 347.1276

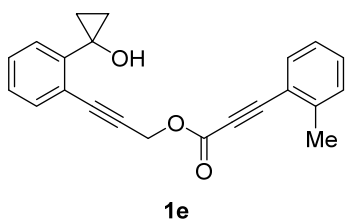

**Analytical data for 1e:** yellow gum;  $^1\text{H}$ -NMR (400 MHz,  $\text{CDCl}_3$ )  $\delta$  7.55 (dd,  $J$  = 7.8, 1.4 Hz, 1H), 7.49 (dd,  $J$  = 7.5, 1.1 Hz, 1H), 7.38–7.29 (m, 3H), 7.27–7.23 (m, 2H), 7.19 (t,  $J$  = 7.3 Hz, 1H), 5.09 (s, 2H), 3.30 (br s, 1H), 2.50 (s, 3H), 1.23 (dd,  $J$  = 7.3, 5.0 Hz, 2H), 1.00 (dd,  $J$  = 7.3, 5.0 Hz, 2H);  $^{13}\text{C}$ -NMR (101 MHz,  $\text{CDCl}_3$ )  $\delta$  153.8, 145.1, 142.6, 133.7, 132.9, 131.0, 129.9, 129.3,

128.2, 127.7, 125.9, 122.3, 119.2, 87.6, 87.0, 86.0, 83.7, 56.9, 54.3, 20.6, 14.4; IR (neat) 3535, 3405, 2213, 1711  $\text{cm}^{-1}$ ; HRMS (DART)  $m/z$   $[\text{M}^+ \text{NH}_4]^+$  calcd for  $\text{C}_{22}\text{H}_{18}\text{O}_3 \cdot \text{NH}_4$  348.1600, found 348.1600

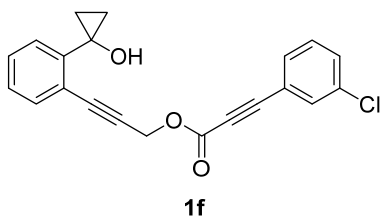

**Analytical data for 1f:** orange gum;  $^1\text{H}$ -NMR (400 MHz,  $\text{CDCl}_3$ )  $\delta$  7.59 (t,  $J$  = 1.8 Hz, 1H), 7.50–7.44 (m, 3H), 7.39–7.30 (m, 2H), 7.26 (dt,  $J$  = 7.2, 1.2 Hz, 2H), 5.10 (s, 2H), 3.30 (s, 1H), 1.23 (dd,  $J$  = 7.1, 5.3 Hz, 2H), 1.00 (dd,  $J$  = 7.1, 5.3 Hz, 2H);  $^{13}\text{C}$ -NMR (101 MHz,  $\text{CDCl}_3$ )  $\delta$  153.3, 145.0, 134.7, 133.0, 132.8, 131.3, 131.3, 130.0, 129.3, 128.3, 127.7, 122.2, 121.0, 87.2,

86.2, 85.8, 80.7, 56.9, 54.6, 14.4; IR (neat) 3535, 3408, 2224, 1714  $\text{cm}^{-1}$ ; HRMS (DART)  $m/z$   $[\text{M}^+ \text{NH}_4]^+$  calcd for  $\text{C}_{21}\text{H}_{15}\text{O}_3\text{Cl} \cdot \text{NH}_4$  368.1054, found 368.1058

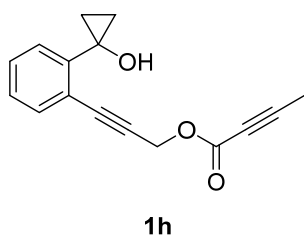

**Analytical data for 1h:** pale yellow gum;  $^1\text{H-NMR}$  (400 MHz,  $\text{CDCl}_3$ )  $\delta$  7.47 (dd,  $J = 7.6, 1.2$  Hz, 1H), 7.36 (dd,  $J = 7.6, 1.2$  Hz, 1H), 7.31 (dt,  $J = 7.6, 1.2$  Hz, 1H), 7.24 (dt,  $J = 7.6, 1.2$  Hz, 1H), 4.99 (s, 2H), 3.42 (br s, 1H), 2.01 (s, 3H), 1.19 (dd,  $J = 7.2, 4.8$  Hz, 2H), 0.99 (dd,  $J = 7.2, 4.8$  Hz, 2H);  $^{13}\text{C-NMR}$  (101 MHz,  $\text{CDCl}_3$ )  $\delta$  153.3, 145.0, 132.9, 129.2, 128.2, 127.7, 122.3, 87.5, 87.3, 85.9, 71.8, 56.9, 54.1, 14.4, 4.0; IR (neat) 3535, 3407, 2320, 2239, 1712, 1248  $\text{cm}^{-1}$ ; HRMS (DART)  $m/z$

$[\text{M} + \text{NH}_4]^+$  calcd for  $\text{C}_{16}\text{H}_{14}\text{O}_3 \cdot \text{NH}_4$  272.1287, found 272.1259

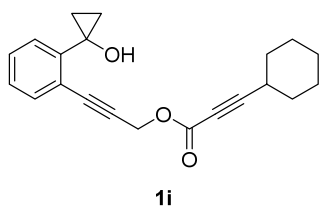

**Analytical data for 1i:** pale yellow gum;  $^1\text{H-NMR}$  (400 MHz,  $\text{CDCl}_3$ )  $\delta$  7.47 (dd,  $J = 7.6, 1.4$  Hz, 1H), 7.36 (dd,  $J = 7.6, 1.4$  Hz, 1H), 7.31 (dt,  $J = 7.6, 1.4$  Hz, 1H), 7.23 (dt,  $J = 7.6, 1.4$  Hz, 1H), 5.00 (s, 2H), 3.34 (br s, 1H), 2.57–2.51 (m, 1H), 1.86–1.82 (m, 2H), 1.75–1.68 (m, 2H), 1.55–1.49 (m, 3H), 1.38–1.31 (m, 3H), 1.21 (dd,  $J = 7.3, 5.0$  Hz, 2H), 0.98 (dd,  $J = 7.3, 5.0$  Hz, 2H);  $^{13}\text{C-NMR}$  (101

MHz,  $\text{CDCl}_3$ )  $\delta$  153.6, 145.1, 132.9, 129.2, 128.2, 127.7, 122.3, 94.9, 87.6, 85.8, 72.5, 56.9, 54.1, 31.4, 29.0, 25.6, 24.7, 14.4; IR (neat) 3535, 3408, 2931, 2233, 1712, 1238  $\text{cm}^{-1}$ ; HRMS (DART)  $m/z$   $[\text{M} + \text{NH}_4]^+$  calcd for  $\text{C}_{21}\text{H}_{22}\text{O}_3 \cdot \text{NH}_4$  340.1913, found 340.1911

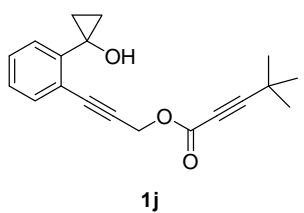

**Analytical data for 1j:** light orange gum;  $^1\text{H-NMR}$  (400 MHz,  $\text{CDCl}_3$ )  $\delta$  7.48 (d,  $J = 7.3$  Hz, 1H), 7.36 (d,  $J = 7.8$  Hz, 1H), 7.33–7.29 (m, 1H), 7.25–7.22 (m, 1H), 5.00 (s, 2H), 3.35 (br s, 1H), 1.29 (s, 9H), 1.21 (dd,  $J = 7.1, 5.3$  Hz, 2H), 0.98 (dd,  $J = 7.1, 5.3$  Hz, 2H);  $^{13}\text{C-NMR}$  (101 MHz,  $\text{CDCl}_3$ )  $\delta$  153.6, 145.1, 132.9, 129.2, 128.2, 127.7, 122.3, 98.4, 87.6, 85.8, 71.2, 56.9, 54.0, 29.9, 27.7, 14.4; IR (neat)

3539, 3415, 2972, 2225, 1712, 1213  $\text{cm}^{-1}$ ; HRMS (DART)  $m/z$   $[\text{M} + \text{NH}_4]^+$  calcd for  $\text{C}_{19}\text{H}_{20}\text{O}_3 \cdot \text{NH}_4$  314.1756, found 314.1727

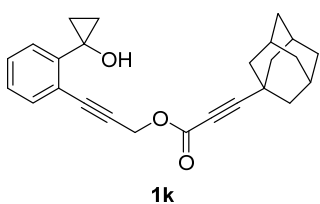

**Analytical data for 1k:** light orange gum;  $^1\text{H-NMR}$  (400 MHz,  $\text{CDCl}_3$ )  $\delta$  7.48 (d,  $J = 7.3$  Hz, 1H), 7.37–7.35 (m, 1H), 7.33–7.29 (m, 1H), 7.25–7.22 (m, 1H), 5.00 (s, 2H), 3.35 (br s, 1H), 1.99 (br s, 3H), 1.93 (br s, 6H), 1.70 (br s, 6H), 1.21 (dd,  $J = 7.1, 5.3$  Hz, 2H), 0.98 (dd,  $J = 7.1, 5.3$  Hz, 2H);  $^{13}\text{C-NMR}$  (101 MHz,  $\text{CDCl}_3$ )  $\delta$  153.8, 145.1, 132.9, 129.2, 128.1, 127.7, 122.3, 97.9, 87.7, 85.8, 71.5,

56.9, 54.0, 41.5, 36.1, 29.8, 27.6, 14.4; IR (neat) 3535, 3409, 2908, 2225, 1712, 1242  $\text{cm}^{-1}$ ; HRMS (DART)  $m/z$   $[\text{M} - \text{H}_2\text{O}]^+$  calcd for  $\text{C}_{25}\text{H}_{25}\text{O}_2$  357.1855, found 357.1855

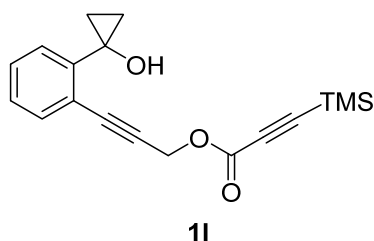

**Analytical data for 1l:** pale yellow gum;  $^1\text{H-NMR}$  (400 MHz,  $\text{CDCl}_3$ )  $\delta$  7.48 (d,  $J = 7.8$  Hz, 1H), 7.37–7.35 (m, 1H), 7.33–7.29 (m, 1H), 7.25–7.23 (m, 1H), 5.02 (s, 2H), 3.27 (br s, 1H), 1.21 (dd,  $J = 7.1, 5.3$  Hz, 2H), 0.98 (dd,  $J = 7.1, 5.3$  Hz, 2H), 0.26 (s, 9H);  $^{13}\text{C-NMR}$  (101 MHz,  $\text{CDCl}_3$ )  $\delta$  152.6, 145.0, 133.0, 129.3, 128.2, 127.7, 122.2, 96.0, 93.8, 87.3, 86.0, 56.9, 54.3, 14.4, -0.9; IR (neat) 3539, 3413, 2960, 1714, 1211  $\text{cm}^{-1}$ ; HRMS (DART)  $m/z$

$[\text{M} + \text{NH}_4]^+$  calcd for  $\text{C}_{18}\text{H}_{20}\text{O}_3\text{Si} \cdot \text{NH}_4$  330.1525, found 330.1530

### Synthesis of S6g

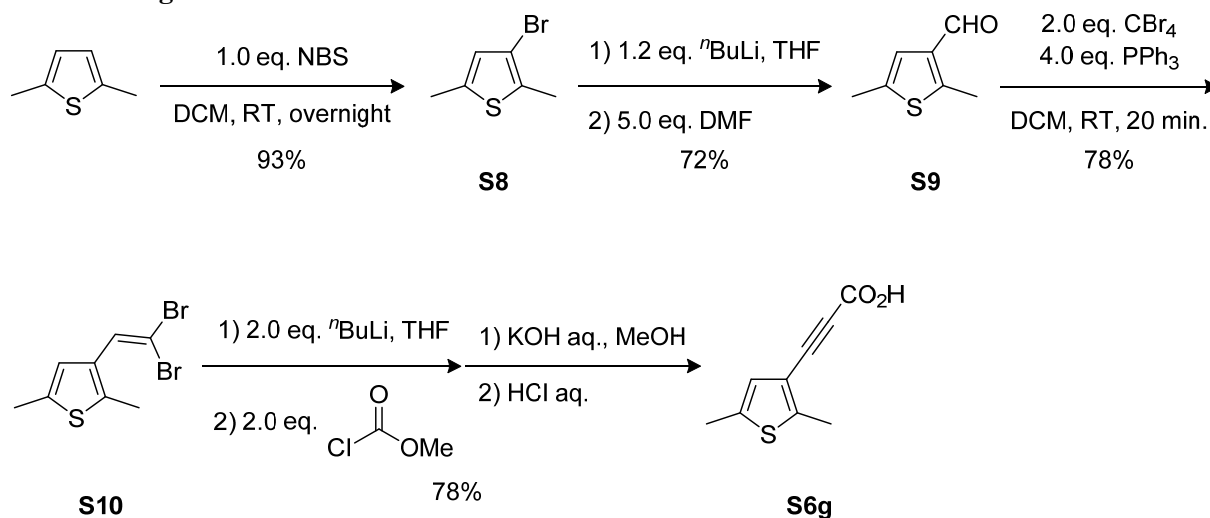

### Synthesis and characterization of S8

A known compound **S8** was synthesized as reported<sup>14</sup>.

### Synthesis and characterization of S9<sup>15</sup>

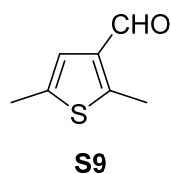

A solution of **S8** (3.56 g, 18.6 mmol) in THF (40 mL) was cooled under Ar atmosphere to  $-78^\circ\text{C}$ . A solution of  $n\text{-BuLi}$  (14.0 mL, 1.60 M in hexane) was added and the mixture was stirred for 1 h. After addition of dry DMF (7.20 mL, 93.0 mmol), the mixture was warmed to rt and stirred for another 1 h. The reaction was quenched with water and extracted with  $\text{Et}_2\text{O}$ . The organic layer was washed with brine, dried over  $\text{MgSO}_4$ , and concentrated *in vacuo*. The residue was purified by silica gel column chromatography (Hexane/ $\text{EtOAc} = 20:1$ ) to furnish **S9**<sup>15</sup> (1.87 g, 72%).

### Synthesis and characterization of S10

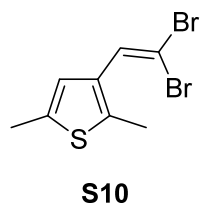

To a solution of  $\text{PPh}_3$  (14.4 g, 54.9 mmol) in DCM (100 mL) was added  $\text{CBr}_4$  (9.04 g, 27.3 mmol) and **S9** (1.87 g, 13.4 mmol) at  $0^\circ\text{C}$ . The reaction mixture was stirred at rt for 20 min. The reaction was quenched with water. The aqueous phase was extracted with DCM. The combined organic layer was washed with sat. aq.  $\text{NaHCO}_3$  and brine, dried over  $\text{MgSO}_4$  and concentrated *in vacuo*. The residue was purified by silica gel column chromatography (Hexane) to furnish **S10** (3.07 g, 78%).

**Analytical data for S10:**  $^1\text{H-NMR}$  (400 MHz,  $\text{CDCl}_3$ )  $\delta$  7.31 (s, 1H),



7.12 (s, 1H), 2.37 (s, 3H), 2.28 (s, 3H);  $^{13}\text{C}$ -NMR (101 MHz,  $\text{CDCl}_3$ )  $\delta$  137.3, 135.6, 132.1, 131.1, 124.4, 88.3, 15.5, 13.8; IR (neat)  $2916\text{ cm}^{-1}$ ; HRMS (DART)  $m/z$   $[\text{M} + \text{H}]^+$  calcd for  $\text{C}_8\text{H}_8\text{Br}_2\text{S}\cdot\text{H}$  294.8792, found 294.8771

### Synthesis and characterization of S6g

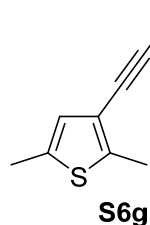

A solution of **S10** (3.07 g, 10.3 mmol) in THF (30 mL) was cooled under Ar atmosphere to 0 °C. A solution of  $n\text{BuLi}$  (12.8 mL, 1.60 M in hexane) was added and the mixture was stirred for 15 min. Methyl chloroformate (1.90 g, 20.6 mmol) was added to the mixture. After being stirred at 0 °C for 30 min, the reaction mixture was quenched with water and extracted with  $\text{Et}_2\text{O}$ . The organic layer was washed with brine, dried over  $\text{MgSO}_4$ , and concentrated *in vacuo*. To a solution of the crude product in MeOH (40 mL) was added

20% aq. KOH (11.2 g, 200 mmol), and the solution was stirred at rt for 30 min. After that, 1 M aq. HCl was added slowly at 0 °C until the pH value was less than 1. This mixture was extracted with EtOAc. The organic layer was washed with brine, dried over  $\text{Na}_2\text{SO}_4$ , and concentrated *in vacuo*. **S6g** was obtained as a brown solid (1.44g, 78%). **Analytical data for S6g:** brown solid (mp 120.1–121.1 °C);  $^1\text{H}$ -NMR (400 MHz,  $\text{CDCl}_3$ )  $\delta$  6.71 (s, 1H), 2.54 (s, 3H), 2.39 (s, 3H);  $^{13}\text{C}$ -NMR (101 MHz,  $\text{CDCl}_3$ )  $\delta$  159.1, 149.4, 137.0, 127.3, 115.7, 85.2, 82.8, 15.2, 14.7; IR (neat)  $2916, 1666\text{ cm}^{-1}$ ; HRMS (DART)  $m/z$   $[\text{M} + \text{H}]^+$  calcd for  $\text{C}_9\text{H}_8\text{O}_2\text{S}\cdot\text{H}$  181.0239, found 181.0244

### Synthesis and characterization of 1g

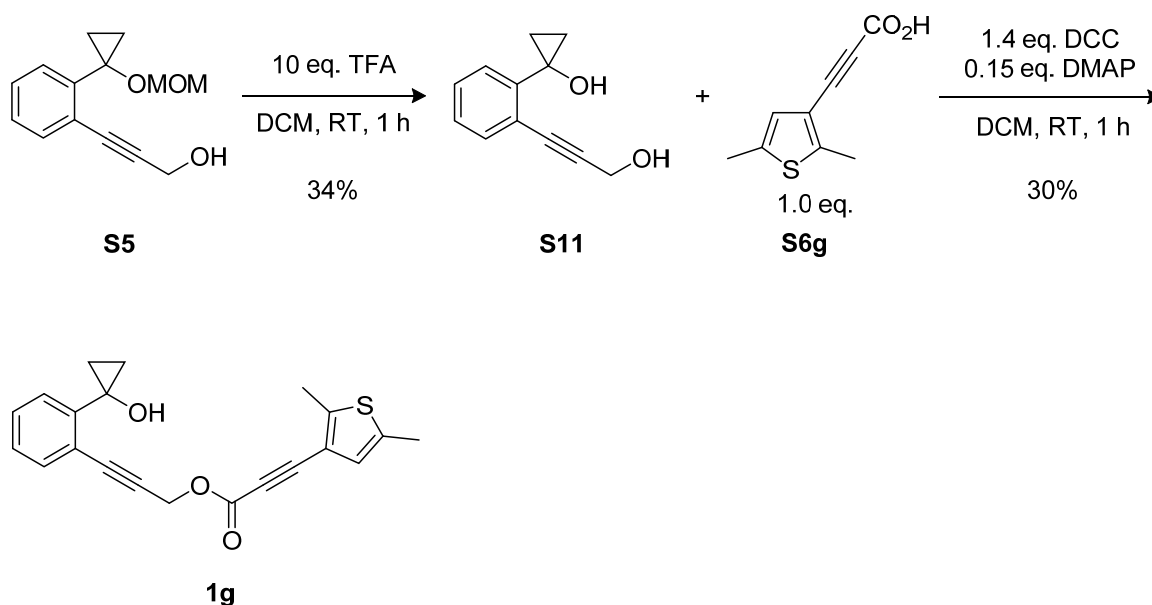

Synthesis and characterization of **S11**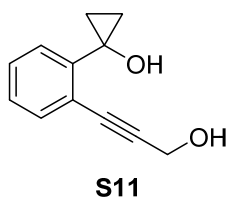

To a 50 mL flask was added **S5** (682 mg, 2.93 mmol) followed by degassed DCM (20 mL). TFA (2.20 mL, 29.3 mmol) was slowly added to the solution. After stirring at rt for 1 h under Ar atmosphere, the reaction mixture was diluted with water and extracted with EtOAc. The organic layer was washed with sat. aq. NaHCO<sub>3</sub> and brine, dried over MgSO<sub>4</sub>, and concentrated *in vacuo*. The residue was purified by silica gel column chromatography (Hexane/EtOAc = 5:1) to furnish **S11** (188 mg, 34%). **Analytical data for S11:** brown solid (mp 81.3–83.1 °C); <sup>1</sup>H-NMR (400 MHz, CDCl<sub>3</sub>) δ 7.48 (d, *J* = 7.3 Hz, 1H), 7.35 (d, *J* = 7.8 Hz, 1H), 7.32–7.25 (m, 2H), 4.57 (d, *J* = 5.9 Hz, 2H), 3.19 (s, 1H), 1.83 (t, *J* = 5.9 Hz, 1H), 1.20 (t, *J* = 6.2 Hz, 2H), 1.01 (t, *J* = 6.2 Hz, 2H); <sup>13</sup>C-NMR (101 MHz, CDCl<sub>3</sub>) δ 144.0, 132.8, 128.6, 128.4, 127.8, 123.5, 92.8, 84.0, 57.1, 51.3, 14.1; IR (KBr) 3307 cm<sup>-1</sup>; HRMS (DART) *m/z* [M+ H]<sup>+</sup> calcd for C<sub>12</sub>H<sub>12</sub>O<sub>2</sub>•H 189.0916, found 189.0903

Synthesis and characterization of **1g**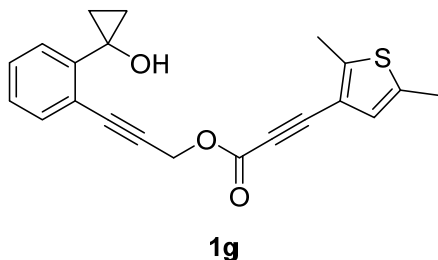

To a 30 mL flask was charged with **S11** (157 mg, 0.840 mmol), **S6g** (151 mg, 0.840 mmol) and DMAP (15.4 mg, 0.130 mmol). To the mixture was added a DCM (8 mL) solution of DCC (193 mg, 0.935 mmol) at 0 °C, and the resulting solution was stirred at rt for 1 h. The reaction mixture was filtered through a pad of Celite® with EtOAc. The filtrate was washed with water, sat. aq. NaHCO<sub>3</sub> and brine. The solution was dried over MgSO<sub>4</sub>, and concentrated *in vacuo*. The residue was purified by silica gel column chromatography (Hexane/EtOAc = 10:1) to furnish **1g** (89.4 mg, 30%). **Analytical data for 1g:** <sup>1</sup>H-NMR (400 MHz, CDCl<sub>3</sub>) δ 7.48 (dd, *J* = 7.3, 1.4 Hz, 1H), 7.36 (dd, *J* = 7.3, 1.4 Hz, 1H), 7.31 (dt, *J* = 7.3, 1.4 Hz, 1H), 7.25 (dt, *J* = 7.3, 1.4 Hz, 1H), 6.70 (s, 1H), 5.06 (s, 2H), 3.39 (br s, 1H), 2.53 (s, 3H), 2.38 (s, 3H), 1.22 (dd, *J* = 7.1, 5.3 Hz, 2H), 0.99 (dd, *J* = 7.1, 5.3 Hz, 2H); <sup>13</sup>C-NMR (101 MHz, CDCl<sub>3</sub>) δ 154.0, 148.9, 145.1, 136.9, 132.9, 129.2, 128.2, 127.7, 127.3, 122.3, 87.7, 85.9, 83.8, 82.4, 56.9, 54.2, 15.2, 14.7, 14.4; IR (neat) 3535, 3406, 2210, 1709 cm<sup>-1</sup>; HRMS (DART) *m/z* [M+ H]<sup>+</sup> calcd for C<sub>21</sub>H<sub>18</sub>O<sub>3</sub>S•H 351.1055, found 351.1035

## Synthesis of 1m

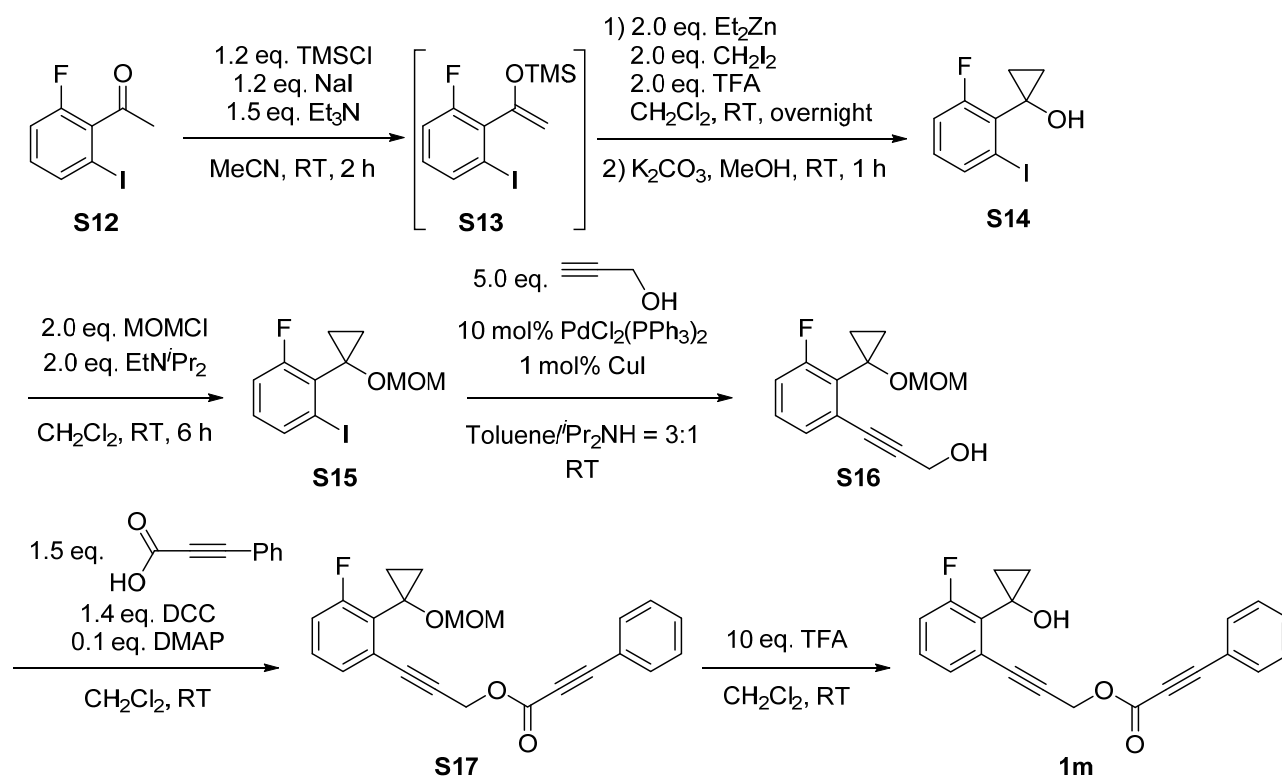

## Synthesis and characterization of S14

This compound was prepared in the same manner as described for **S3** using **S12**<sup>16</sup> instead of **S1** in 61% yield as a pale-yellow solid. **Analytical data for S14:** pale-yellow solid (mp 82.3–84.4 °C); <sup>1</sup>H-NMR (400 MHz, CDCl<sub>3</sub>) δ 7.66 (d, *J* = 7.8 Hz, 1H), 7.08–7.03 (m, 1H), 6.99–6.94 (m, 1H), 2.83 (br s, 1H), 1.44–1.32 (m, 2H), 1.09–0.97 (m, 2H); <sup>13</sup>C-NMR (101 MHz, CDCl<sub>3</sub>) δ 161.1 (d, *J* = 256.1 Hz), 135.4 (d, *J* = 2.9 Hz), 131.3 (d, *J* = 13.5 Hz), 130.8 (d, *J* = 8.6 Hz), 116.4 (d, *J* = 23.1 Hz), 101.5, 55.3, 16.6 (d, *J* = 4.7 Hz, 2C); <sup>19</sup>F NMR (376 MHz, CDCl<sub>3</sub>): δ –112.3; IR (KBr) 3402 cm<sup>–1</sup>; HRMS (DART) *m/z* [M+NH<sub>4</sub>]<sup>+</sup> calcd for C<sub>9</sub>H<sub>8</sub>FIO•NH<sub>4</sub> 295.9948, found 295.9948.

## Synthesis and characterization of S15

This compound was prepared in the same manner as described for **S4** using **S14** instead of **S3** in 91% yield as a yellow oil. **Analytical data for S15:** <sup>1</sup>H-NMR (400 MHz, CDCl<sub>3</sub>) δ 7.70–7.68 (m, 1H), 7.06–7.01 (m, 1H), 6.98–6.93 (m, 1H), 4.74 (s, 2H), 3.12 (s, 3H), 1.44–1.42 (m, 2H), 1.05–1.02 (m, 2H); <sup>13</sup>C-NMR (101 MHz, CDCl<sub>3</sub>) δ 161.4 (d, *J* = 254.2 Hz), 135.7 (d, *J* = 3.8 Hz), 130.7 (d, *J* = 8.7 Hz), 130.2 (d, *J* = 13.5 Hz), 115.8 (d, *J* = 24.0 Hz), 102.2, 96.0, 59.4, 55.6, 15.5 (2C); <sup>19</sup>F NMR (376 MHz, CDCl<sub>3</sub>) δ –110.6; IR (neat) 1562, 1440 cm<sup>–1</sup>; HRMS (DART) *m/z* [M+NH<sub>4</sub>]<sup>+</sup> calcd for C<sub>11</sub>H<sub>12</sub>FIO<sub>2</sub>•NH<sub>4</sub> 340.0210, found 340.0201.

## Synthesis and characterization of S16

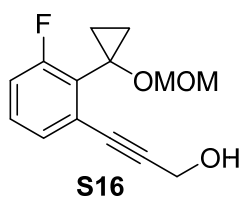

This compound was prepared in the same manner as described for **S5** using **S15** instead of **S4** in 59% yield as a brown oil. **Analytical data for S16:**  $^1\text{H-NMR}$  (400 MHz,  $\text{CDCl}_3$ )  $\delta$  7.27–7.19 (m, 2H), 7.06–7.02 (m, 1H), 4.78 (s, 2H), 4.50 (d,  $J = 5.5$  Hz, 2H), 3.29 (t,  $J = 5.5$  Hz, 1H), 3.23 (s, 3H), 1.39–1.35 (m, 2H), 1.06–1.02 (m, 2H);  $^{13}\text{C-NMR}$  (101 MHz,  $\text{CDCl}_3$ )  $\delta$  162.3 (d,  $J = 251.4$  Hz), 129.5 (d,  $J = 10.6$  Hz), 128.9 (d,  $J = 14.4$  Hz), 127.8 (d,  $J = 2.9$  Hz), 126.3 (d,  $J = 4.7$  Hz), 116.1 (d,  $J = 23.1$  Hz), 95.0, 93.4, 83.7 (d,  $J = 3.8$  Hz), 55.3, 55.2, 51.4, 13.7 (d,  $J = 2.8$  Hz, 2C);  $^{19}\text{F}$  NMR (376 MHz,  $\text{CDCl}_3$ )  $\delta$  –114.1; IR (neat) 3417  $\text{cm}^{-1}$ ; HRMS (DART)  $m/z$   $[\text{M}+\text{NH}_4]^+$  calcd for  $\text{C}_{14}\text{H}_{15}\text{FO}_3\cdot\text{NH}_4$  268.1349, found 268.1327.

## Synthesis and characterization of S17

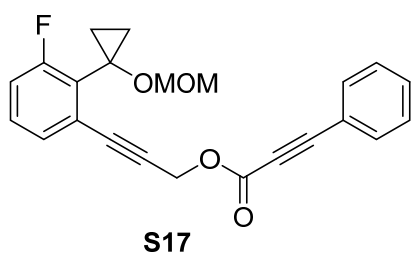

This compound was prepared in the same manner as described for **S7a** using **S16** instead of **S5** in 79% yield as an orange gum. **Analytical data for S17:**  $^1\text{H-NMR}$  (400 MHz,  $\text{CDCl}_3$ )  $\delta$  7.62–7.59 (m, 2H), 7.49–7.45 (m, 1H), 7.41–7.37 (m, 2H), 7.29–7.21 (m, 2H), 7.08–7.03 (m, 1H), 5.11 (s, 2H), 4.76 (s, 2H), 3.13 (s, 3H), 1.38–1.34 (m, 2H), 1.06–1.03 (m, 2H);  $^{13}\text{C-NMR}$  (101 MHz,  $\text{CDCl}_3$ )  $\delta$  162.1 (d,  $J = 251.3$  Hz), 153.2, 133.1 (2C),

130.9, 129.6 (d,  $J = 14.4$  Hz), 129.4 (d,  $J = 9.6$  Hz), 128.7 (d,  $J = 3.9$  Hz), 128.6 (2C), 125.3 (d,  $J = 4.8$  Hz), 119.3, 116.5 (d,  $J = 23.1$  Hz, 2C), 95.7, 87.4, 87.3, 85.0 (d,  $J = 3.8$  Hz), 79.9, 55.6, 55.3, 54.1, 13.8 (d,  $J = 2.8$  Hz);  $^{19}\text{F}$  NMR (376 MHz,  $\text{CDCl}_3$ )  $\delta$  –114.6; IR (neat) 2222, 1715  $\text{cm}^{-1}$ ; HRMS (DART)  $m/z$   $[\text{M}+\text{NH}_4]^+$  calcd for  $\text{C}_{23}\text{H}_{19}\text{FO}_4\cdot\text{NH}_4$  396.1611, found 396.1640.

## Synthesis and characterization of 1m

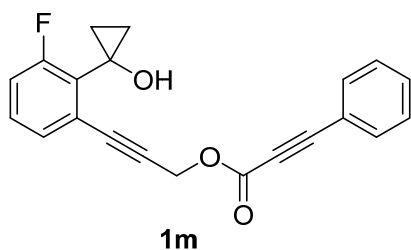

This compound was prepared in the same manner as described for **1a** using **S17** instead of **S7a** in 69% yield as an orange gum. **Analytical data for 1m:**  $^1\text{H-NMR}$  (400 MHz,  $\text{CDCl}_3$ )  $\delta$  7.61–7.59 (m, 2H), 7.49–7.45 (m, 1H), 7.38 (t,  $J = 7.5$  Hz, 2H), 7.28–7.19 (m, 2H), 7.08–7.03 (m, 1H), 5.09 (s, 2H), 2.99 (s, 1H), 1.30–1.27 (m, 2H), 1.07–1.03 (m, 2H);  $^{13}\text{C-NMR}$  (101 MHz,  $\text{CDCl}_3$ )  $\delta$  161.2 (d,  $J = 250.4$  Hz), 153.4, 133.1 (2C), 131.3

(d,  $J = 14.4$  Hz), 130.9, 129.3 (d,  $J = 9.6$  Hz), 128.7 (d,  $J = 3.9$  Hz), 128.6 (2C), 124.5 (d,  $J = 5.8$  Hz), 119.2, 117.0 (d,  $J = 23.1$  Hz), 87.80, 87.77, 84.8 (d,  $J = 4.8$  Hz), 79.8, 54.1, 51.0 (d,  $J = 2.8$  Hz), 15.1 (d,  $J = 3.8$  Hz, 2C);  $^{19}\text{F}$  NMR (376 MHz,  $\text{CDCl}_3$ )  $\delta$  –115.8; IR (neat) 3399, 2221, 1713  $\text{cm}^{-1}$ ; HRMS (DART)  $m/z$   $[\text{M}+\text{NH}_4]^+$  calcd for  $\text{C}_{21}\text{H}_{15}\text{FO}_3\cdot\text{NH}_4$  352.1349, found 352.1361.

## Synthesis of 1n

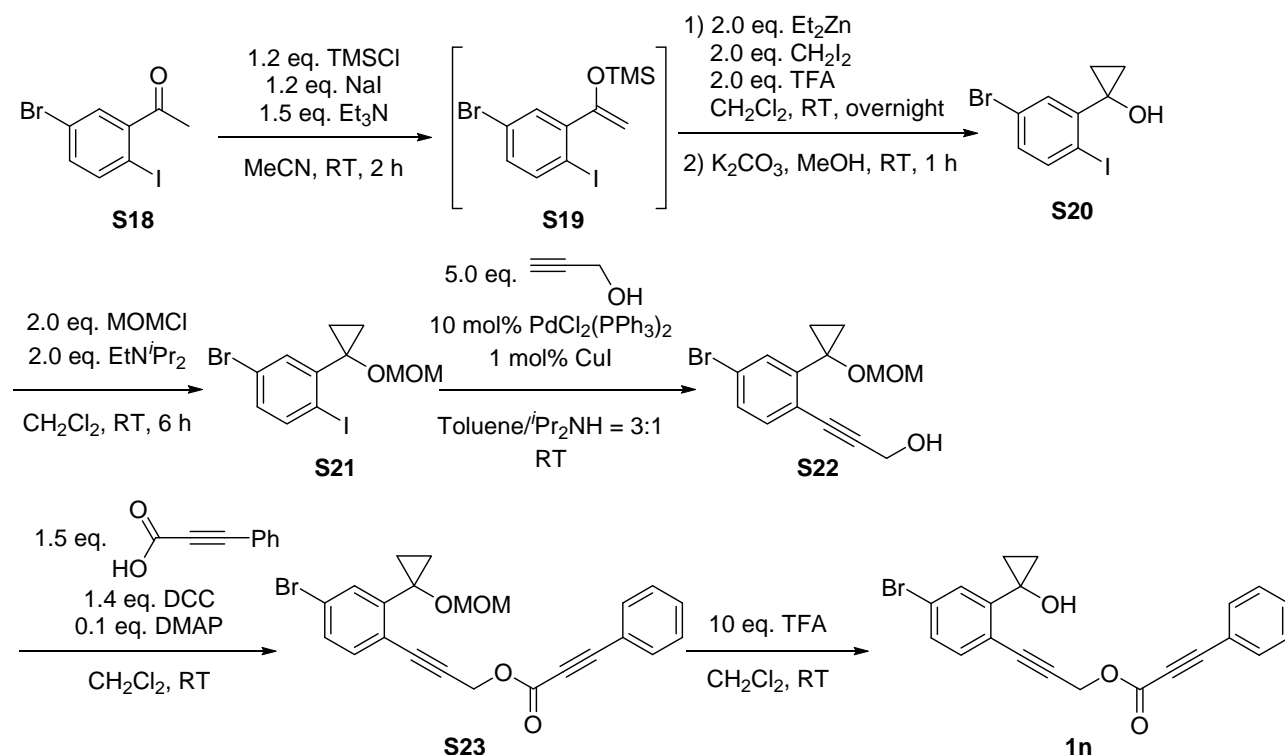

## Synthesis and characterization of S20

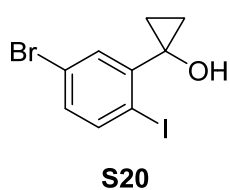

This compound was prepared in the same manner as described for **S3** using **S18**<sup>16</sup> instead of **S1** in 57% yield as a yellow solid. **Analytical data for S20:** yellow solid (mp 85.4–87.2 °C); <sup>1</sup>H-NMR (400 MHz, CDCl<sub>3</sub>) δ 7.69 (d, *J* = 8.2 Hz, 1H), 7.48 (d, *J* = 2.3 Hz, 1H), 7.13 (dd, *J* = 8.2, 2.3 Hz, 1H), 3.04 (s, 1H), 1.29 (dd, *J* = 7.3, 5.5 Hz, 2H), 0.97 (dd, *J* = 7.3, 5.5 Hz, 2H); <sup>13</sup>C-NMR (101 MHz, CDCl<sub>3</sub>) δ 145.7, 140.8, 133.9, 132.6, 122.4,

98.6, 60.5, 15.5 (2C); IR (KBr) 3195 cm<sup>-1</sup>; HRMS (DART) *m/z* [M–OH]<sup>+</sup> calcd for C<sub>9</sub>H<sub>7</sub><sup>81</sup>BrI 322.8755, found 322.8752.

## Synthesis and characterization of S21

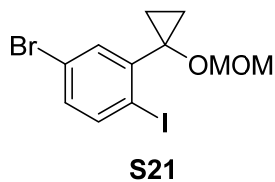

This compound was prepared in the same manner as described for **S4** using **S20** instead of **S3** in 88% yield as a yellow oil. **Analytical data for S21:** <sup>1</sup>H-NMR (400 MHz, CDCl<sub>3</sub>) δ 7.73 (d, *J* = 8.2 Hz, 1H), 7.46 (d, *J* = 2.7 Hz, 1H), 7.12 (dd, *J* = 8.2, 2.7 Hz, 1H), 4.60 (s, 2H), 3.16 (s, 3H), 1.34 (dd, *J* = 7.6, 5.7 Hz, 2H), 0.96 (dd, *J* = 7.6, 5.7 Hz, 2H); <sup>13</sup>C-NMR (101 MHz, CDCl<sub>3</sub>) δ 144.0, 141.1, 134.8, 132.4, 121.7, 99.1, 95.2, 64.5, 55.7, 13.9

(2C); IR (neat) 2945, 1442 cm<sup>-1</sup>; HRMS (DART) *m/z* [M+NH<sub>4</sub>]<sup>+</sup> calcd for C<sub>11</sub>H<sub>12</sub>BrIO<sub>2</sub>•NH<sub>4</sub> 399.9409, found 399.9434.

## Synthesis and characterization of S22

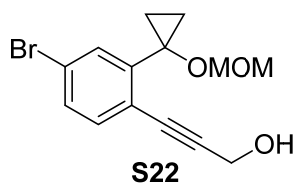**S22**

This compound was prepared in the same manner as described for **S5** using **S22** instead of **S4** in 45% yield as a brown oil. **Analytical data for S22:**  $^1\text{H-NMR}$  (400

MHz,  $\text{CDCl}_3$ )  $\delta$  7.60 (d,  $J = 1.8$  Hz, 1H), 7.39 (dd,  $J = 8.2, 1.8$  Hz, 1H), 7.28 (d,  $J = 8.2$  Hz, 1H), 4.68 (s, 2H), 4.49 (d,  $J = 4.6$  Hz, 2H), 3.22 (s, 3H), 3.07 (t,  $J = 4.6$

Hz, 1H), 1.29 (dd,  $J = 7.3, 6.0$  Hz, 2H), 1.00 (dd,  $J = 7.3, 6.0$  Hz, 2H);  $^{13}\text{C-NMR}$  (101 MHz,  $\text{CDCl}_3$ )  $\delta$  143.6, 133.9, 133.6, 131.1, 123.2, 122.1, 94.8, 93.5, 83.5, 60.9, 55.5, 51.5, 13.1 (2C); IR (neat)  $3409\text{ cm}^{-1}$ ; HRMS (FAB)  $m/z$   $[\text{M}+\text{Na}]^+$  calcd for  $\text{C}_{14}\text{H}_{15}\text{BrO}_3\cdot\text{Na}$  333.0102, found 333.0099

## Synthesis and characterization of S23

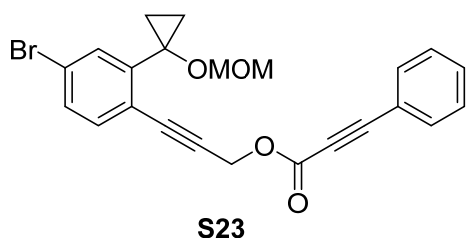**S23**

This compound was prepared in the same manner as described for **S7a** using **S22** instead of **S5** in 81% yield as an orange gum.

**Analytical data for S23:**  $^1\text{H-NMR}$  (400 MHz,  $\text{CDCl}_3$ )  $\delta$  7.60–7.58 (m, 3H), 7.48–7.44 (m, 1H), 7.40–7.33 (m, 4H), 5.10 (s, 2H), 4.65 (s, 2H), 3.17 (s, 3H), 1.29 (dd,  $J = 7.3, 5.5$  Hz, 2H), 0.99 (dd,  $J = 7.3, 5.5$  Hz, 2H);  $^{13}\text{C-NMR}$  (101 MHz,  $\text{CDCl}_3$ )  $\delta$  153.1, 144.2, 134.2,

133.5, 133.0 (2C), 130.84, 130.79, 128.5 (2C), 122.5, 122.2, 119.2, 95.2, 87.6, 87.3, 84.9, 79.9, 61.0, 55.5, 54.1, 12.9 (2C); IR (neat)  $2220, 1714\text{ cm}^{-1}$ ; HRMS (DART)  $m/z$   $[\text{M}+\text{NH}_4]^+$  calcd for  $\text{C}_{23}\text{H}_{19}\text{BrO}_4\cdot\text{NH}_4$  456.0811, found 456.0819.

## Synthesis and characterization of 1n

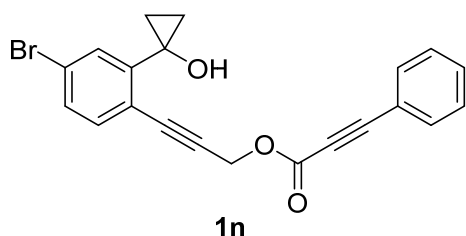**1n**

This compound was prepared in the same manner as described for **1a** using **S23** instead of **S7a** in 69% yield as an orange gum.

**Analytical data for 1n:**  $^1\text{H-NMR}$  (400 MHz,  $\text{CDCl}_3$ )  $\delta$  7.59–7.57 (m, 2H), 7.50 (d,  $J = 2.3$  Hz, 1H), 7.47–7.43 (m, 1H), 7.38–7.30 (m, 4H), 5.05 (s, 2H), 3.54 (br s, 1H), 1.27–1.16 (m, 2H), 1.04–0.96 (m, 2H);  $^{13}\text{C-NMR}$  (101 MHz,  $\text{CDCl}_3$ )  $\delta$  153.4, 146.7, 134.1, 133.0 (2C),

131.4, 130.9, 130.6, 128.5 (2C), 123.1, 121.0, 119.0, 88.2, 87.8, 84.9, 79.7, 56.3, 54.1, 14.3 (2C); IR (neat)  $3398, 2220, 1714\text{ cm}^{-1}$ ; HRMS (ESI)  $m/z$   $[\text{M}+\text{Na}]^+$  calcd for  $\text{C}_{21}\text{H}_{15}\text{BrO}_3\cdot\text{Na}$  417.0102, found 417.0090.

Synthesis of **1o**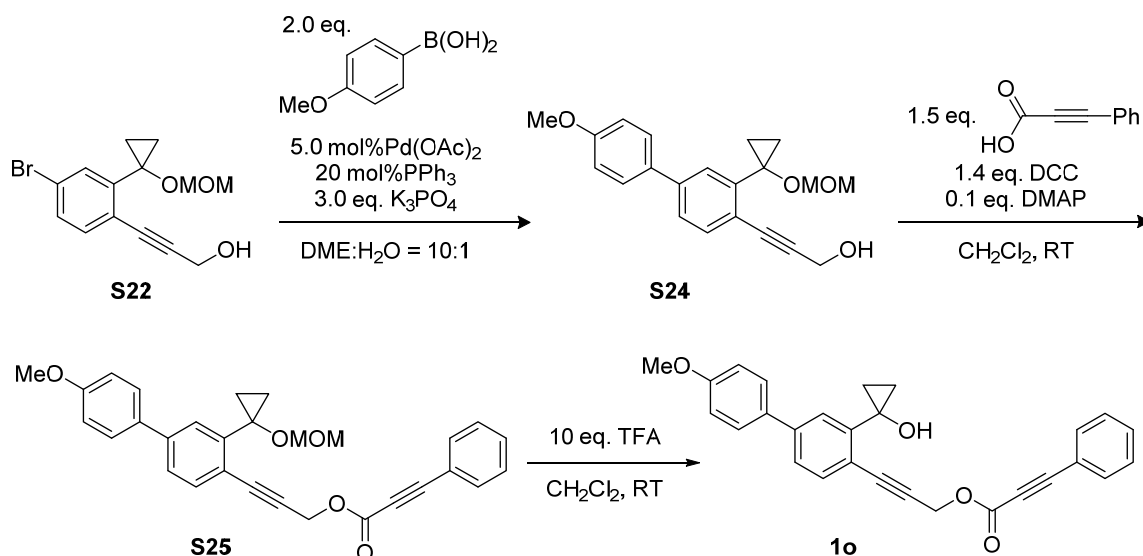Synthesis and characterization of **S24**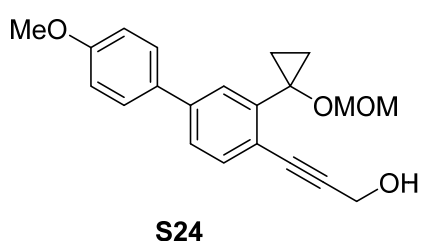

To a solution of **S22** (156 mg, 0.500 mmol) and 4-methoxyphenylboronic acid (152 mg, 1.00 mmol) in DME (3.0 mL) and H<sub>2</sub>O (0.30 mL) was added Pd(OAc)<sub>2</sub> (5.61 mg, 0.0250 mmol), PPh<sub>3</sub> (26.2 mg, 0.100 mmol) and K<sub>3</sub>PO<sub>4</sub> (318 mg, 1.50 mmol). Then the resulting solution was stirred at 60 °C for 4 h. After that, the reaction mixture was diluted with water and extracted with Et<sub>2</sub>O. The organic

layer was washed with brine, dried over MgSO<sub>4</sub>, and concentrated *in vacuo*. The residue was purified by silica gel column chromatography (Hexane/EtOAc = 5:1) to furnish **S24** (120 mg, 72%) as a black gum. **Analytical data for S24:** <sup>1</sup>H-NMR (400 MHz, CDCl<sub>3</sub>) δ 7.66 (d, *J* = 1.2 Hz, 1H), 7.52 (dd, *J* = 10.8, 2.0 Hz, 2H), 7.48-7.42 (m, 2H), 6.97 (dd, *J* = 10.8, 2.0 Hz, 2H), 4.73 (s, 2H), 4.53 (d, *J* = 3.6 Hz, 2H), 3.84 (s, 3H), 3.37 (br s, 1H), 3.25 (s, 3H), 1.33 (dd, *J* = 7.2, 5.6 Hz, 2H), 1.05 (dd, *J* = 7.2, 5.6 Hz, 2H); <sup>13</sup>C-NMR (101 MHz, CHCl<sub>3</sub>) δ 159.6, 141.9, 140.7, 132.9, 132.5, 129.3, 128.2, 126.1, 122.6, 114.4, 94.8, 92.9, 84.5, 61.4, 55.6, 55.4, 51.7, 13.1 (2C); IR (neat) 3403 cm<sup>-1</sup>; HRMS (ESI) *m/z* [M+ NH<sub>4</sub>]<sup>+</sup> calcd for C<sub>21</sub>H<sub>22</sub>O<sub>4</sub>•Na 361.1416, found 361.1387.

**Synthesis and characterization of S25**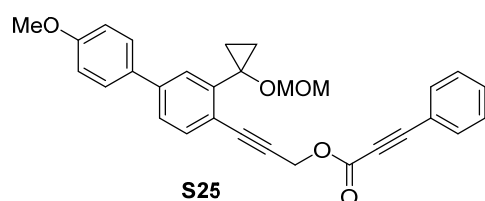

This compound was prepared in the same manner as described for **S7a** using **S24** instead of **S5** in 91% yield as an orange gum.

**Analytical data for S25:**  $^1\text{H-NMR}$  (400 MHz,  $\text{CDCl}_3$ )  $\delta$  7.66 (d,  $J$  = 1.6 Hz, 1H), 7.59 (dt,  $J$  = 6.8, 1.6 Hz, 2H), 7.55-7.51 (m, 3H), 7.47-7.42 (m, 2H), 7.38-7.34 (m, 2H), 6.97 (dt,  $J$  = 9.6, 2.4 Hz, 2H),

5.14 (s, 2H), 4.70 (s, 2H), 3.83 (s, 3H), 3.20 (s, 3H), 1.33 (dd,  $J$  = 7.2, 5.6 Hz, 2H), 1.05 (dd,  $J$  = 7.2, 5.6 Hz, 2H);  $^{13}\text{C-NMR}$  (101 MHz,  $\text{CDCl}_3$ )  $\delta$  159.7, 153.4, 142.5, 141.0, 133.7, 133.2 (2C), 132.5, 131.0, 129.0, 128.7 (2C), 128.2 (2C), 125.9, 121.6, 119.5, 114.4 (2C), 95.2, 87.4, 87.0, 86.2, 80.2, 61.6, 55.7, 55.4, 54.5, 13.1 (2C); IR (neat) 2220, 1712  $\text{cm}^{-1}$ ; HRMS (ESI)  $m/z$   $[\text{M}+\text{Na}]^+$  calcd for  $\text{C}_{30}\text{H}_{26}\text{O}_5\cdot\text{Na}$  489.1678, found 489.1692.

**Synthesis and characterization of 1o**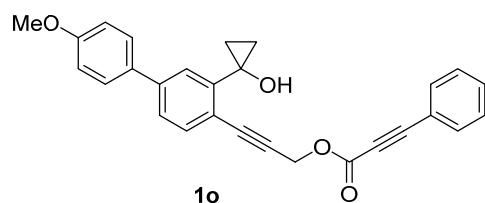

This compound was prepared in the same manner as described for **1a** using **S25** instead of **S7a** in 66% yield as an orange gum.

**Analytical data for 1o:**  $^1\text{H-NMR}$  (400 MHz,  $\text{CDCl}_3$ )  $\delta$  7.60 (dd,  $J$  = 8.0, 1.6 Hz, 2H), 7.56 (d,  $J$  = 1.6 Hz, 1H), 7.53-7.50 (m, 3H), 7.46-7.42 (m, 2H), 7.40-7.36 (m, 2H), 6.97 (dd,  $J$  = 6.8, 2.4 Hz,

2H), 5.10 (s, 2H), 3.84 (s, 3H), 3.43 (br s, 1H), 1.26 (dd,  $J$  = 7.2, 5.2 Hz, 2H), 1.04 (dd,  $J$  = 7.2, 5.2 Hz, 2H);  $^{13}\text{C-NMR}$  (101 MHz,  $\text{CDCl}_3$ )  $\delta$  159.7, 153.7, 145.4, 141.7, 133.4, 133.3 (2C), 132.6, 131.1, 128.7 (2C), 128.3 (2C), 126.5, 125.8, 120.3, 119.4, 114.4 (2C), 87.9, 87.7, 86.2, 80.0, 57.1, 55.5, 54.5, 14.5 (2C); IR (neat) 3427, 2221, 1712  $\text{cm}^{-1}$ ; HRMS (ESI)  $m/z$   $[\text{M}+\text{Na}]^+$  calcd for  $\text{C}_{28}\text{H}_{22}\text{O}_4\cdot\text{Na}$  445.1416, found 445.1395.



## Synthesis of 1p

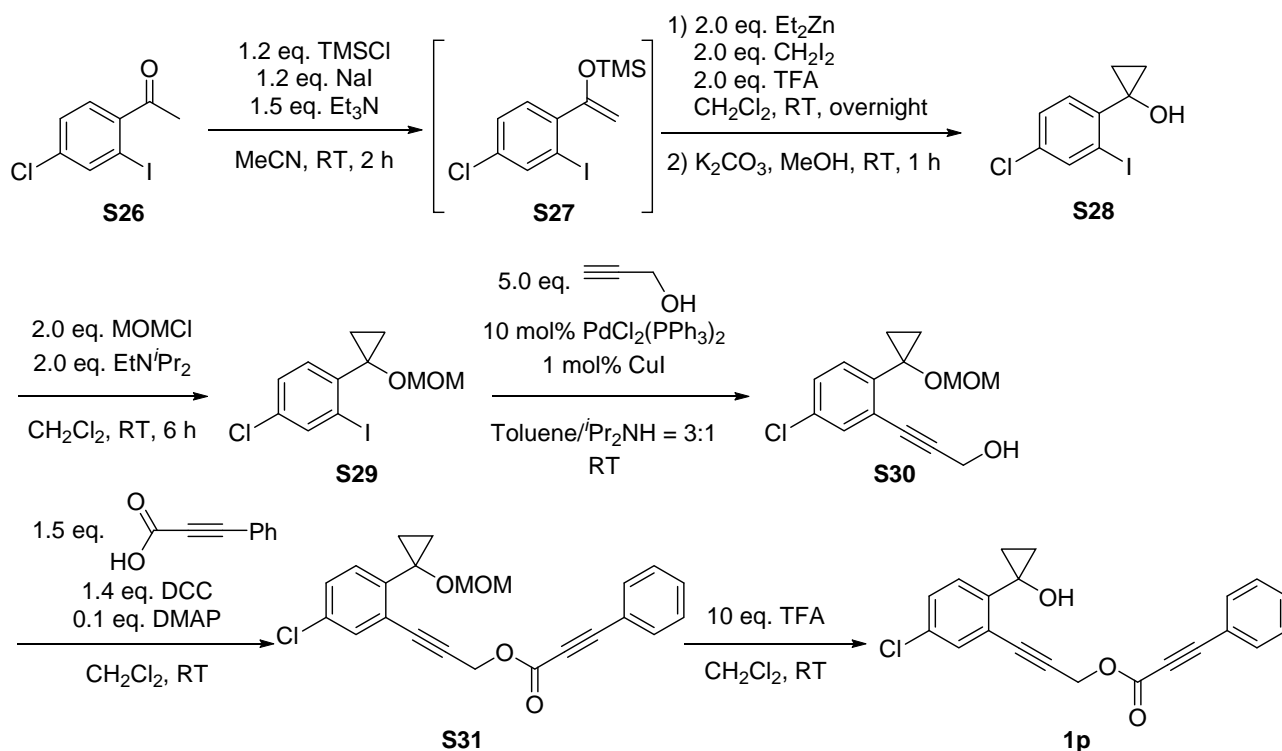

## Synthesis and characterization of S28

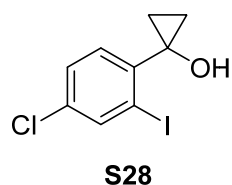

This compound was prepared in the same manner as described for **S3** using **S26**<sup>17</sup> instead of **S1** in 45% yield as a yellow solid. **Analytical data for S28:** <sup>1</sup>H-NMR (400 MHz, CDCl<sub>3</sub>)  $\delta$  7.83 (d,  $J$  = 1.8 Hz, 1H), 7.27–7.22 (m, 2H), 3.15 (s, 1H), 1.25 (dd,  $J$  = 7.3, 5.5 Hz, 2H), 0.92 (dd,  $J$  = 7.3, 5.5 Hz, 2H); <sup>13</sup>C-NMR (101 MHz, CDCl<sub>3</sub>)  $\delta$  142.3, 138.7, 134.2, 131.4, 128.2, 100.7, 60.1, 15.5 (2C); IR (KBr) 3242 cm<sup>-1</sup>; HRMS (DART)  $m/z$

[M–OH]<sup>+</sup> calcd for C<sub>9</sub>H<sub>7</sub>ClI 276.9281, found 276.9251.

## Synthesis and characterization of S29

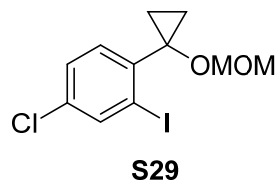

This compound was prepared in the same manner as described for **S4** using **S28** instead of **S3** in 98% yield as a yellow oil. **Analytical data for S29:** <sup>1</sup>H-NMR (400 MHz, CDCl<sub>3</sub>)  $\delta$  7.90 (d,  $J$  = 1.8 Hz, 1H), 7.29–7.25 (m, 2H), 4.60 (s, 2H), 3.16 (s, 3H), 1.35–1.32 (m, 2H), 0.96–0.93 (m, 2H); <sup>13</sup>C-NMR (101 MHz, CDCl<sub>3</sub>)  $\delta$  140.7, 139.2, 134.3, 132.6, 127.7, 101.3, 95.2, 64.4, 55.8, 14.0 (2C); IR (neat) 2947 cm<sup>-1</sup>; HRMS (DART)  $m/z$

[M+NH<sub>4</sub>]<sup>+</sup> calcd for C<sub>11</sub>H<sub>12</sub>ClIO<sub>2</sub>•NH<sub>4</sub> 355.9914, found 355.9929.

## Synthesis and characterization of S30

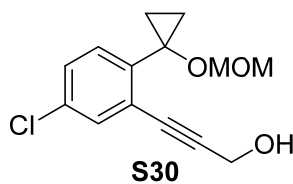

This compound was prepared in the same manner as described for **S5** using **S29** instead of **S4** in 45% yield as a brown oil. **Analytical data for S30:**  $^1\text{H-NMR}$  (400 MHz,  $\text{CDCl}_3$ )  $\delta$  7.41–7.38 (m, 2H), 7.28–7.25 (m, 1H), 4.67 (s, 2H), 4.51 (d,  $J$  = 5.5 Hz, 2H), 3.21 (s, 3H), 2.97 (t,  $J$  = 5.5 Hz, 1H), 1.28 (dd,  $J$  = 7.3, 5.5 Hz, 2H), 0.97 (dd,  $J$  = 7.3, 5.5 Hz, 2H);  $^{13}\text{C-NMR}$  (101 MHz,  $\text{CDCl}_3$ )  $\delta$  140.2, 133.6, 132.3, 131.9, 128.4, 125.9, 94.7, 93.6, 83.2, 60.6, 55.5, 51.4, 13.1 (2C); IR (neat) 3411  $\text{cm}^{-1}$ ; HRMS (DART)  $m/z$   $[\text{M}+\text{NH}_4]^+$  calcd for  $\text{C}_{14}\text{H}_{15}\text{ClO}_3 \cdot \text{NH}_4$  284.1054, found 284.1025.

## Synthesis and characterization of S31

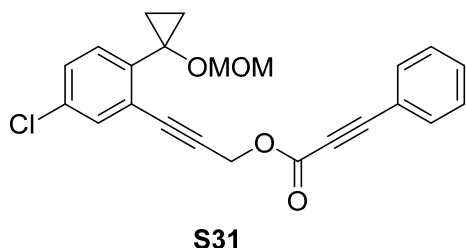

This compound was prepared in the same manner as described for **S7a** using **S30** instead of **S5** in 82% yield as an orange gum. **Analytical data for S31:**  $^1\text{H-NMR}$  (400 MHz,  $\text{CDCl}_3$ )  $\delta$  7.62–7.59 (m, 2H), 7.49–7.45 (m, 2H), 7.41–7.36 (m, 3H), 7.28–7.26 (m, 1H), 5.11 (s, 2H), 4.64 (s, 2H), 3.15 (s, 3H), 1.28 (dd,  $J$  = 7.6, 5.7 Hz, 2H), 0.97 (dd,  $J$  = 7.6, 5.7 Hz, 2H);  $^{13}\text{C-NMR}$  (101 MHz,  $\text{CDCl}_3$ )  $\delta$  153.2, 140.8, 133.4, 133.1 (2C), 132.6, 131.8, 130.9, 128.7, 128.6 (2C), 125.0, 119.3, 95.2, 87.7, 87.4, 84.6, 80.0, 60.8, 55.5, 54.0, 13.0 (2C); IR (neat) 2220, 1716  $\text{cm}^{-1}$ ; HRMS (ESI)  $m/z$   $[\text{M}+\text{Na}]^+$  calcd for  $\text{C}_{23}\text{H}_{19}\text{ClO}_4 \cdot \text{Na}$  417.0870, found 417.0861.

## Synthesis and characterization of 1p

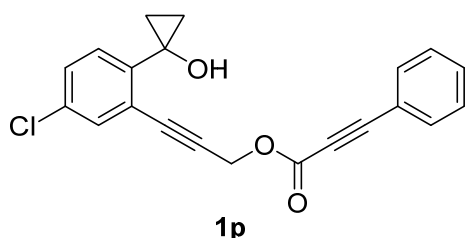

This compound was prepared in the same manner as described for **1a** using **S31** instead of **S7a** in 65% yield as an orange gum. **Analytical data for 1p:**  $^1\text{H-NMR}$  (400 MHz,  $\text{CDCl}_3$ )  $\delta$  7.61–7.59 (m, 2H), 7.49–7.45 (m, 2H), 7.39 (t,  $J$  = 7.6 Hz, 2H), 7.31–7.25 (m, 2H), 5.07 (s, 2H), 3.34 (br s, 1H), 1.22 (dd,  $J$  = 7.6, 5.3 Hz, 2H), 0.96 (dd,  $J$  = 7.6, 5.3 Hz, 2H);  $^{13}\text{C-NMR}$  (101 MHz,  $\text{CDCl}_3$ )  $\delta$  153.5, 143.4, 133.2, 133.1 (2C), 132.5, 131.0, 129.5, 129.2, 128.6 (2C), 123.8, 119.1, 88.4, 88.0, 84.6, 79.8, 56.2, 54.0, 14.4 (2C); IR (neat) 3403, 2220, 1712  $\text{cm}^{-1}$ ; HRMS (DART)  $m/z$   $[\text{M}+\text{NH}_4]^+$  calcd for  $\text{C}_{21}\text{H}_{15}\text{ClO}_3 \cdot \text{NH}_4$  368.1054, found 368.1077.

## Synthesis of 1q

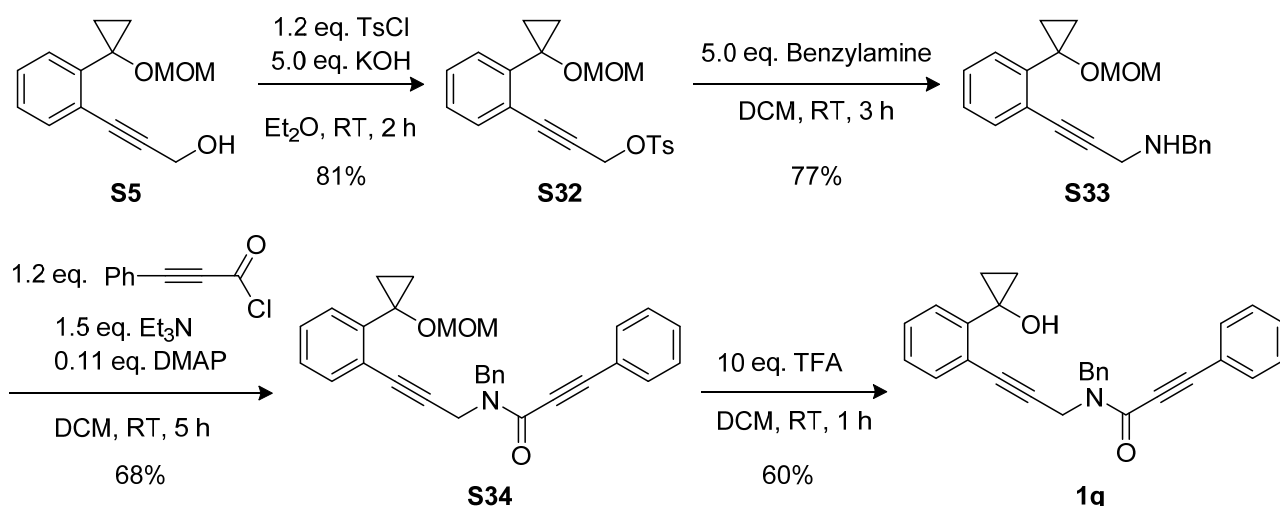

## Synthesis and characterization of S32

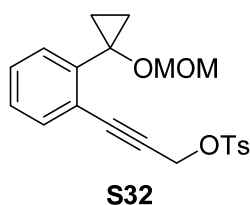

To a dry Et<sub>2</sub>O solution (10 mL) of **S5** (1.16 g, 5.00 mmol) and *p*-toluenesulfonyl chloride (1.20 g, 6.00 mmol) was added KOH (1.43 g, 25 mmol) at 0 °C, and the resulting mixture was stirred at rt for 2 h. The reaction was quenched with water and extracted with Et<sub>2</sub>O. The organic layer was washed with brine, dried over MgSO<sub>4</sub>, and concentrated *in vacuo*. The residue was purified by a silica gel column chromatography (Hexane/EtOAc = 10:1) to furnish **S32** (1.57 g, 81%) as a yellow oil. **Analytical data for S32:** <sup>1</sup>H-NMR (400 MHz, CDCl<sub>3</sub>) δ 7.86 (d, *J* = 8.7 Hz, 2H), 7.41 (d, *J* = 7.8 Hz, 1H), 7.32 (d, *J* = 8.7 Hz, 2H), 7.30–7.20 (m, 3H), 5.01 (s, 2H), 4.58 (s, 2H), 3.12 (s, 3H), 2.41 (s, 3H), 1.20 (dd, *J* = 7.3, 5.5 Hz, 2H), 0.91 (dd, *J* = 7.3, 5.5 Hz, 2H); <sup>13</sup>C-NMR (101 MHz, CDCl<sub>3</sub>) δ 145.1, 142.1, 133.4, 133.2, 130.6, 129.9, 128.9, 128.2, 127.8, 123.0, 95.1, 87.7, 85.0, 61.4, 58.9, 55.6, 21.7, 12.9; IR (neat) 1367, 1176, 1032 cm<sup>-1</sup>; HRMS (DART) *m/z* [M+NH<sub>4</sub>]<sup>+</sup> calcd for C<sub>21</sub>H<sub>22</sub>O<sub>5</sub>S•NH<sub>4</sub> 404.1532, found 404.1521.

## Synthesis and characterization of S33

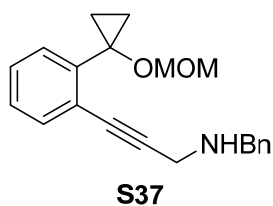

To a stirred solution of **S32** (1.14 g, 2.94 mmol) in DCM (15 mL) was added benzylamine (1.6 mL, 15.0 mmol) at 0 °C. The mixture was stirred at rt for 3 h, and the solvent was removed *in vacuo*. The reaction mixture was filtered through a pad of Celite<sup>®</sup> with EtOAc. The filtrate was dried over MgSO<sub>4</sub>, and concentrated *in vacuo*.

The residue was purified by silica gel column chromatography (Hexane/EtOAc = 10:1) to furnish **S33** (746 mg, 77%) as a yellow oil. **Analytical data for S33:** <sup>1</sup>H-NMR (400 MHz, CDCl<sub>3</sub>) δ 7.48–7.39 (m, 4H), 7.34 (t, *J* = 7.6 Hz, 2H), 7.28–7.25 (m, 3H), 4.66 (s, 2H), 4.01 (s, 2H), 3.73 (s, 2H), 3.17 (s, 3H), 1.27 (dd, *J* = 7.3, 5.5 Hz, 2H), 1.01 (dd, *J* = 7.3, 5.5 Hz, 2H); <sup>13</sup>C-NMR (101 MHz, CDCl<sub>3</sub>) δ 141.5, 139.9, 133.1, 130.7, 128.6, 128.5, 127.9, 127.8, 127.2, 124.9, 95.1, 92.5, 82.4, 61.6, 55.6, 52.5, 38.6, 13.0; IR (neat) 3319, 1153, 1032 cm<sup>-1</sup>; HRMS (DART) *m/z* [M+H]<sup>+</sup> calcd for C<sub>21</sub>H<sub>23</sub>NO<sub>2</sub>•H 322.1807, found 322.1791.

Synthesis and characterization of **S34**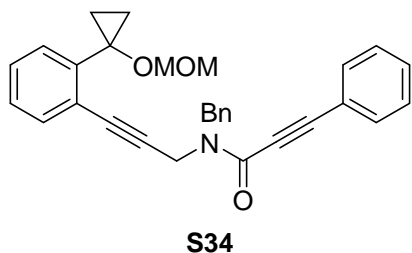

To a 30 mL flask was added **S33** (953 mg, 2.96 mmol) followed by dry DCM (5.0 mL), Et<sub>3</sub>N (610  $\mu$ L, 4.43 mmol), and DMAP (38.6 mg, 0.340 mmol). 3-Phenyl-2-propynoyl chloride<sup>18</sup> (583 mg, 3.54 mmol) was added slowly at 0 °C. After stirring for 5 h at rt, the reaction was quenched with water and extracted with DCM. The organic layer was washed with brine, dried over MgSO<sub>4</sub>, and concentrated *in vacuo*. The residue was purified

by silica gel column chromatography (Hexane/EtOAc = 10:1) to furnish **S34** (930 mg, 68%) as an orange gum. **S34** was analyzed as a mixture of rotamers (major/minor = 3:2). **Analytical data for S34:** <sup>1</sup>H-NMR (400 MHz, CDCl<sub>3</sub>) **major**  $\delta$  7.55–7.52 (m, 2H), 7.46–7.23 (m, 12H), 5.14 (s, 2H), 4.66 (s, 2H), 4.49 (s, 2H), 3.18 (s, 3H), 1.29–1.25 (m, 2H), 1.02–0.97 (m, 2H); **minor**  $\delta$  7.61–7.58 (m, 2H), 7.46–7.23 (m, 12H), 4.93 (s, 2H), 4.63 (s, 2H), 4.62 (s, 2H), 3.14 (s, 3H), 1.29–1.25 (m, 2H), 1.02–0.97 (m, 2H); <sup>13</sup>C-NMR (101 MHz, CDCl<sub>3</sub>) **major**  $\delta$  154.3, 142.0, 136.1, 133.1, 132.6, 130.48, 130.34, 128.8, 128.7, 128.2, 128.1, 127.9, 124.2, 120.38, 95.2, 91.0, 87.9, 83.1, 81.6, 61.6, 55.63, 51.4, 33.5, 12.9; **minor**  $\delta$  154.5, 142.2, 136.2, 133.0, 132.6, 130.50, 130.32, 129.0, 128.8, 128.4, 128.2, 127.9, 123.9, 120.43, 95.2, 91.3, 87.8, 83.8, 81.3, 61.6, 55.57, 46.7, 38.8, 12.9; IR (neat) 1631 cm<sup>-1</sup>; HRMS (DART)  $m/z$  [M+ H]<sup>+</sup> calcd for C<sub>30</sub>H<sub>27</sub>NO<sub>3</sub>•H 450.2069, found 450.2076.

Synthesis and characterization of **1q**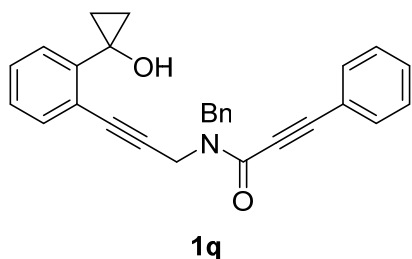

To a 50 mL flask was added **S34** (439 mg, 0.97 mmol) followed by degassed DCM (12 mL). TFA (0.700 mL, 9.70 mmol) was added slowly, and the flask was flushed with Ar. After stirring at rt for 1 h, the reaction mixture was diluted with water and extracted with EtOAc. The organic layer was washed with sat. aq. NaHCO<sub>3</sub> and brine, dried over MgSO<sub>4</sub>, and concentrated *in vacuo*. The residue was purified by silica gel column

chromatography (Hexane/EtOAc = 10:1) to furnish **1q** (238 mg, 60%) as an orange gum. **1q** was analyzed as a mixture of rotamers (major/minor = 2:1). **Analytical data for 1q:** <sup>1</sup>H-NMR (400 MHz, CDCl<sub>3</sub>) **major**  $\delta$  7.52–7.50 (m, 2H), 7.45–7.20 (m, 12H), 5.05 (s, 2H), 4.40 (s, 2H), 3.49 (br s, 1H), 1.21 (dd,  $J$  = 7.3, 5.0 Hz, 2H), 0.98 (dd,  $J$  = 7.3, 5.0 Hz, 2H); **minor**  $\delta$  7.59–7.56 (m, 2H), 7.45–7.20 (m, 12H), 4.87 (s, 2H), 4.62 (s, 2H), 2.92 (br s, 1H), 1.15 (dd,  $J$  = 7.3, 5.5 Hz, 2H), 0.97 (dd,  $J$  = 7.3, 5.5 Hz, 2H); <sup>13</sup>C-NMR (101 MHz, CDCl<sub>3</sub>) **major**  $\delta$  154.6, 144.8, 135.6, 132.7, 132.5, 130.3, 128.9, 128.8, 128.5, 128.2, 128.0, 127.7, 127.5, 122.7, 120.0, 91.1, 88.6, 82.6, 81.1, 56.7, 52.5, 34.4, 14.2; **minor**  $\delta$  154.3, 144.3, 135.8, 133.0, 132.5, 130.3, 128.9, 128.6, 128.5, 128.2, 127.9, 127.7, 127.6, 122.4, 120.0, 91.5, 88.4, 83.4, 81.0, 57.0, 47.1, 38.6, 14.2; IR (neat) 3548, 2214, 1621 cm<sup>-1</sup>; HRMS (DART)  $m/z$  [M+ H]<sup>+</sup> calcd for C<sub>28</sub>H<sub>23</sub>NO<sub>2</sub>•H 406.1807, found 406.1805.

## Synthesis of 1r

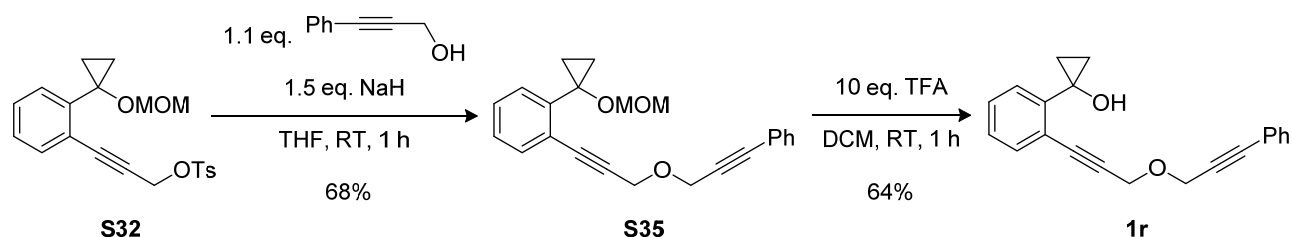

## Synthesis and characterization of S35

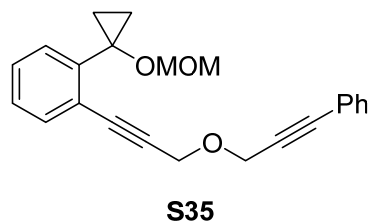

To a solution of 3-phenyl-2-propyn-1-ol (264 mg, 2.00 mmol) in dry THF (10 mL) was added NaH (60% dispersion in mineral oil, 121 mg, 3.00 mmol) at 0 °C under an Ar atmosphere. The reaction mixture was stirred at 0 °C for 1 h. To this reaction mixture was added a THF (5.0 mL) solution of **S32** (822 mg, 2.13 mmol), and the mixture was stirred for 1 h at rt. The reaction was

quenched with water. The aqueous phase was extracted with EtOAc. The combined organic layer was washed with brine and dried over MgSO<sub>4</sub>. After concentration *in vacuo*, the obtained crude product was purified by silica gel column chromatography (hexane/EtOAc = 10:1) to afford **S35** (470 mg, 68%) as a yellow oil.

**Analytical data for S35:** <sup>1</sup>H-NMR (400 MHz, CDCl<sub>3</sub>) δ 7.50–7.42 (m, 4H), 7.33–7.23 (m, 5H), 4.65 (s, 2H), 4.63 (s, 2H), 4.62 (s, 2H), 3.17 (s, 3H), 1.29 (dd, *J* = 7.1, 5.7 Hz, 2H), 1.01 (dd, *J* = 7.1, 5.7 Hz, 2H); <sup>13</sup>C-NMR (101 MHz, CDCl<sub>3</sub>) δ 142.0, 133.1, 131.9, 130.5, 128.6, 128.4, 128.3, 127.9, 124.2, 122.7, 95.2, 89.2, 86.8, 85.7, 84.8, 61.6, 57.5, 57.2, 55.6, 12.9; IR (neat) 1230, 1153 cm<sup>-1</sup>; HRMS (DART) *m/z* [M– MOMOH]<sup>+</sup> calcd for C<sub>21</sub>H<sub>17</sub>O 285.1279, found 285.1292

## Synthesis and characterization of 1r

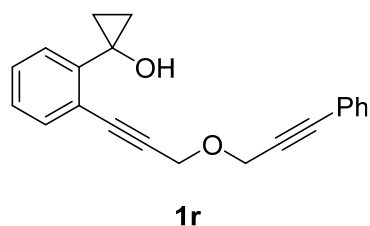

To a 50 mL flask was added **S35** (468 mg, 1.35 mmol) followed by degassed DCM (13 mL). TFA (1.00 mL, 13.5 mmol) was slowly added to the solution. After stirring at rt for 1 h under Ar atmosphere, the reaction mixture was diluted with water and extracted with EtOAc. The organic layer was washed with sat. aq. NaHCO<sub>3</sub> and brine, dried over MgSO<sub>4</sub>, and concentrated *in vacuo*.

The residue was purified by silica gel column chromatography (Hexane/EtOAc = 10:1) to furnish **1r** (261 mg, 64%) as a yellow gum. **Analytical data for 1r:** <sup>1</sup>H-NMR (400 MHz, CDCl<sub>3</sub>) δ 7.50 (dd, *J* = 7.1, 1.1 Hz, 1H), 7.48–7.44 (m, 2H), 7.37–7.29 (m, 5H), 7.25 (dt, *J* = 7.4, 1.7 Hz, 1H), 4.63 (s, 2H), 4.59 (s, 2H), 3.18 (s, 1H), 1.22 (dd, *J* = 7.3, 5.0 Hz, 2H), 1.02 (dd, *J* = 7.3, 5.0 Hz, 2H); <sup>13</sup>C-NMR (101 MHz, CDCl<sub>3</sub>) δ 144.5, 133.1, 131.9, 128.9, 128.7, 128.4, 128.1, 127.8, 122.7, 122.5, 89.9, 87.2, 85.5, 84.2, 57.5, 57.4, 57.2, 14.4; IR (neat) 3413, 1225 cm<sup>-1</sup>; HRMS (DART) *m/z* [M– H<sub>2</sub>O]<sup>+</sup> calcd for C<sub>21</sub>H<sub>17</sub>O 285.1279, found 285.1289

Synthesis of **1s**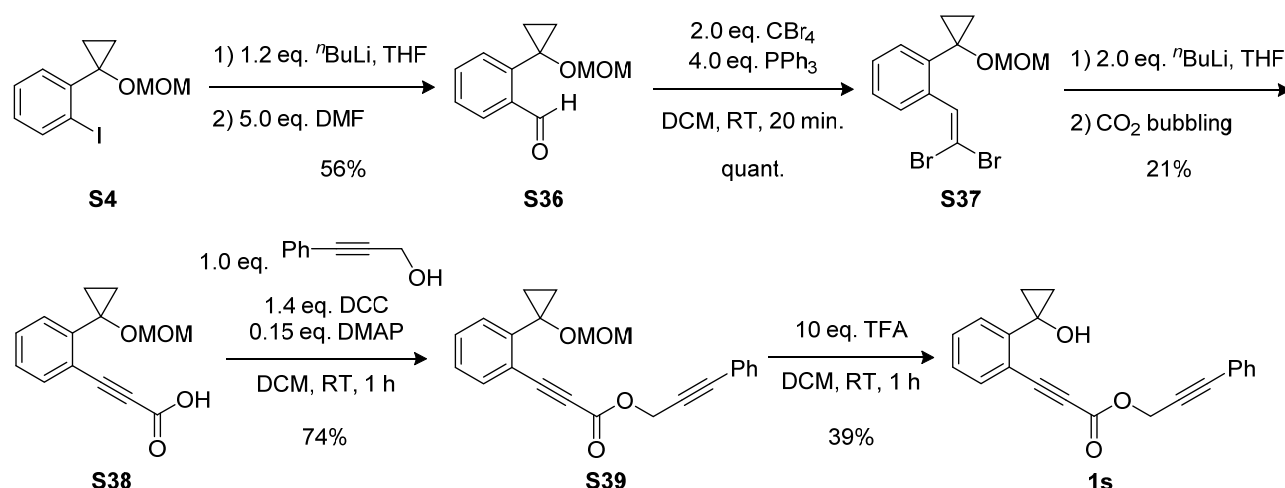Synthesis and characterization of **S36**

**S36**

A solution of **S4** (2.97 g, 9.76 mmol) in THF (20 mL) was cooled under Ar atmosphere to  $-78^\circ\text{C}$ . A solution of  $n\text{BuLi}$  (7.46 mL, 1.60 M in hexane) was added and the mixture was stirred for 1 h. To the resulting mixture was added DMF (3.58 mL, 4.90 mmol) at  $-78^\circ\text{C}$ , and the mixture was stirred for 1 h. The reaction mixture was quenched by water and extracted with EtOAc. The organic layer was washed with brine, dried over  $\text{MgSO}_4$ , and concentrated *in vacuo*. The residue was purified by silica gel column chromatography (Hexane/EtOAc = 20:1) to furnish **S36** (1.21 g, 56%) as an orange liquid. **Analytical data for S36:**  $^1\text{H-NMR}$  (400 MHz,  $\text{CDCl}_3$ )  $\delta$  10.88 (s, 1H), 7.97 (dd,  $J = 7.5, 1.6$  Hz, 1H), 7.55–7.51 (m, 1H), 7.46–7.42 (m, 2H), 4.60 (s, 2H), 3.11 (s, 3H), 1.36 (dd,  $J = 7.1, 5.3$  Hz, 2H), 1.08 (dd,  $J = 7.1, 5.3$  Hz, 2H);  $^{13}\text{C-NMR}$  (101 MHz,  $\text{CDCl}_3$ )  $\delta$  193.0, 142.8, 135.3, 133.5, 129.3, 128.6, 127.8, 95.4, 59.7, 55.9, 12.8; IR (neat) 1693, 1032  $\text{cm}^{-1}$ ; HRMS (DART)  $m/z$   $[\text{M}+\text{NH}_4]^+$  calcd for  $\text{C}_{12}\text{H}_{14}\text{O}_3\cdot\text{NH}_4$  224.1287, found 224.1276

Synthesis and characterization of **S37**

**S37**

To a solution of  $\text{PPh}_3$  (2.67 g, 10.2 mmol) in DCM (12 mL) was added  $\text{CBr}_4$  (1.76 g, 5.08 mmol) and **S36** (559 mg, 2.54 mmol) at  $0^\circ\text{C}$ . The reaction mixture was stirred at rt for 20 min. The reaction was quenched with water. The aqueous phase was extracted with DCM. The combined organic layer was washed with sat. aq.  $\text{NaHCO}_3$  and brine, dried over  $\text{MgSO}_4$  and concentrated to ca. 5 mL. The solution was poured slowly into hexane (40 mL). The resulting suspension was filtrated and the filtrate was concentrated. The resulting suspension was filtrated, concentrated, and purified by silica gel column chromatography (hexane was used as an eluent) to afford **S37** (827 mg, quant.) as a yellow liquid. **Analytical data for S37:**  $^1\text{H-NMR}$  (400 MHz,  $\text{CDCl}_3$ )  $\delta$  7.98 (s, 1H), 7.64 (dd,  $J = 7.1, 2.1$  Hz, 1H), 7.37–7.27 (m, 3H), 4.55 (s, 2H), 3.18 (s, 3H), 1.22 (dd,  $J = 7.1, 5.3$  Hz, 2H), 0.91 (dd,  $J = 7.1, 5.3$  Hz, 2H);  $^{13}\text{C-NMR}$  (101 MHz,  $\text{CDCl}_3$ )  $\delta$  137.8, 136.9,

136.7, 129.7, 129.3, 128.1, 128.0, 95.0, 90.3, 60.8, 55.9, 12.4; IR (neat) 1032  $\text{cm}^{-1}$ ; HRMS (DART)  $m/z$   $[\text{M}+\text{NH}_4]^+$  calcd for  $\text{C}_{13}\text{H}_{14}\text{Br}_2\text{O}_2\cdot\text{NH}_4$  377.9704, found 377.9717

### Synthesis and characterization of S38

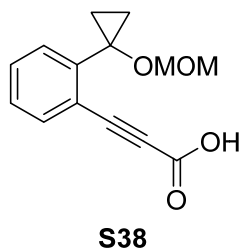

A solution of **S37** (635 mg, 2.00 mmol) in THF (19 mL) was cooled under Ar atmosphere to  $-78^\circ\text{C}$ . A solution of  $n\text{BuLi}$  (2.84 mL, 1.60 M in hexane) was added and the mixture was stirred for 1 h. The mixture was warmed to  $-40^\circ\text{C}$  and  $\text{CO}_2$  gas bubbled into the solution for 1 h. The reaction mixture was quenched by the slow addition of 2.0 M aqueous HCl and extracted with EtOAc. The organic layer was washed with brine, dried over  $\text{MgSO}_4$ , and concentrated *in vacuo*. The crude product was recrystallized

from toluene and hexane at rt, affording pure **S38** (105 mg, 21%) as a white powder (mp  $81.9\text{--}83.0^\circ\text{C}$ ).

**Analytical data for S38:**  $^1\text{H}$ -NMR (400 MHz,  $\text{CDCl}_3$ )  $\delta$  7.60 (dd,  $J = 7.6, 1.2$  Hz, 1H), 7.58 (dd,  $J = 7.6, 1.2$  Hz, 1H), 7.48 (dt,  $J = 7.6, 1.2$  Hz, 1H), 7.36 (dt,  $J = 7.6, 1.2$  Hz, 1H), 4.77 (s, 2H), 3.34 (s, 3H), 1.36 (dd,  $J = 7.2, 6.0$  Hz, 2H), 1.01 (dd,  $J = 7.2, 6.0$  Hz, 2H);  $^{13}\text{C}$ -NMR (101 MHz,  $\text{CDCl}_3$ )  $\delta$  155.3, 143.5, 133.9, 131.3, 130.9, 128.5, 121.2, 94.8, 86.4, 84.9, 61.2, 55.7, 13.0; IR (KBr) 2943, 2210, 1678  $\text{cm}^{-1}$ ; HRMS (DART)  $m/z$   $[\text{M}+\text{NH}_4]^+$  calcd for  $\text{C}_{14}\text{H}_{14}\text{O}_4\cdot\text{NH}_4$  264.1236, found 264.1214

### Synthesis and characterization of S39

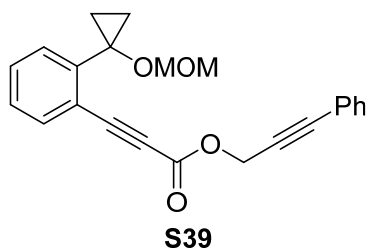

To a 20 mL flask was charged with **S38** (105 mg, 0.420 mmol), 3-phenyl-2-propyn-1-ol (55.5 mg, 0.420 mmol) and DMAP (5.13 mg, 0.042 mmol). To the mixture was added a DCM (4 mL) solution of DCC (122 mg, 0.590 mmol) at  $0^\circ\text{C}$ , and the resulting solution was stirred at rt for 1 h. The reaction mixture was filtered through a pad of Celite<sup>®</sup> with EtOAc. The filtrate was washed with water, sat. aq.  $\text{NaHCO}_3$  and brine. The solution was dried over

$\text{MgSO}_4$ , and concentrated *in vacuo*. The residue was purified by silica gel column chromatography (Hexane/EtOAc = 20:1) to furnish **S39** (115 mg, 74%) as a light-yellow gum. **Analytical data for S39:**  $^1\text{H}$ -NMR (400 MHz,  $\text{CDCl}_3$ )  $\delta$  7.62 (d,  $J = 7.3$  Hz, 1H), 7.49–7.47 (m, 3H), 7.43–7.39 (m, 1H), 7.35–7.29 (m, 4H), 5.07 (s, 2H), 4.66 (s, 2H), 3.14 (s, 3H), 1.34 (dd,  $J = 7.1, 5.7$  Hz, 2H), 1.03 (dd,  $J = 7.1, 5.7$  Hz, 2H);  $^{13}\text{C}$ -NMR (101 MHz,  $\text{CDCl}_3$ )  $\delta$  153.5, 144.2, 134.3, 132.0, 130.6, 130.5, 129.0, 128.4, 128.0, 122.1, 121.0, 95.4, 87.2, 86.3, 84.3, 82.4, 61.4, 55.6, 54.2, 13.1; IR (neat) 2220, 1712, 1171  $\text{cm}^{-1}$ ; HRMS (DART)  $m/z$   $[\text{M}+\text{NH}_4]^+$  calcd for  $\text{C}_{23}\text{H}_{20}\text{O}_4\cdot\text{NH}_4$  378.1705, found 378.1717

Synthesis and characterization of **1s**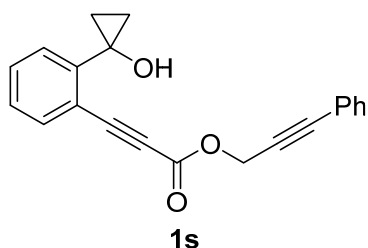

To a 20 mL flask was added **S39** (115 mg, 0.31 mmol) followed by degassed DCM (4 mL). TFA (0.240 mL, 3.10 mmol) was slowly added to the solution. After stirring at rt for 1 h under Ar atmosphere, the reaction mixture was diluted with water and extracted with EtOAc. The organic layer was washed with sat. aq. NaHCO<sub>3</sub> and brine, dried over MgSO<sub>4</sub>, and concentrated *in vacuo*. The residue was purified by silica gel column chromatography

(Hexane/EtOAc = 10:1) to furnish **1s** (238 mg, 60%) as a light-yellow gum. **Analytical data for 1s:** <sup>1</sup>H-NMR (400 MHz, CDCl<sub>3</sub>) δ 7.64 (dd, *J* = 7.6, 0.8 Hz, 1H), 7.49–7.43 (m, 4H), 7.34–7.31 (m, 4H), 5.08 (s, 2H), 2.94 (s, 1H), 1.29 (dd, *J* = 7.3, 5.5 Hz, 2H), 1.05 (dd, *J* = 7.3, 5.5 Hz, 2H); <sup>13</sup>C-NMR (101 MHz, CDCl<sub>3</sub>) δ 153.3, 146.5, 134.4, 132.1, 131.2, 129.0, 128.8, 128.4, 128.0, 122.0, 119.8, 87.4, 86.1, 84.9, 82.1, 56.9, 54.4, 14.7; IR (neat) 3398, 2216, 1712, 1173 cm<sup>-1</sup>; HRMS (DART) *m/z* [M+ H]<sup>+</sup> calcd for C<sub>21</sub>H<sub>16</sub>O<sub>3</sub>•H 317.1178, found 317.1175

Synthesis of **6**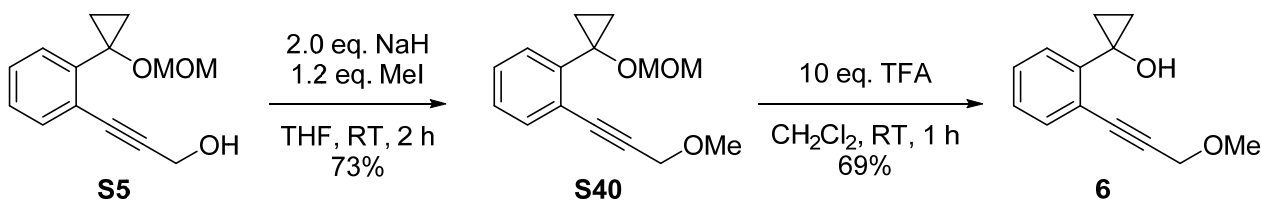Synthesis and characterization of **S40**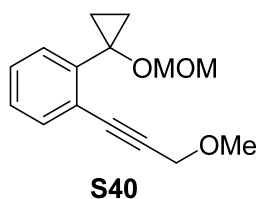

To a solution of **S5** (348 mg, 1.50 mmol) in dry THF (5 mL) was added NaH (60% dispersion in mineral oil, 122 mg, 3.00 mmol) at 0 °C under an Ar atmosphere. The reaction mixture was stirred at rt for 1 h. To this reaction mixture was added iodomethane (112 μL, 1.80 mmol) and the mixture was stirred at rt for 2 h. The reaction was quenched with water. The aqueous phase was extracted with EtOAc. The

combined organic layer was washed with brine and dried over MgSO<sub>4</sub>, and concentrated *in vacuo*. The crude product was purified by silica gel column chromatography (Hexane/EtOAc = 10:1) to afford **S40** (268 mg, 73%) as a yellow oil. **Analytical data for S40:** <sup>1</sup>H-NMR (400 MHz, CDCl<sub>3</sub>) δ 7.48 (dd, *J* = 7.1, 2.1 Hz, 1H), 7.43 (dd, *J* = 7.3, 1.4 Hz, 1H), 7.31–7.23 (m, 2H), 4.64 (s, 2H), 4.40 (s, 2H), 3.49 (s, 3H), 3.17 (s, 3H), 1.26 (dd, *J* = 7.2, 5.6 Hz, 2H), 1.00 (dd, *J* = 7.2, 5.6 Hz, 2H); <sup>13</sup>C-NMR (101 MHz, CDCl<sub>3</sub>) δ 141.8, 133.1, 130.6, 128.1, 127.8, 124.3, 95.1, 89.7, 85.1, 61.5, 60.6, 57.6, 55.5, 12.9; IR (neat) 1034 cm<sup>-1</sup>; HRMS (DART) *m/z* [M+ NH<sub>4</sub>]<sup>+</sup> calcd for C<sub>15</sub>H<sub>18</sub>O<sub>3</sub>•NH<sub>4</sub> 264.1600, found 264.1600



Synthesis and characterization of **6**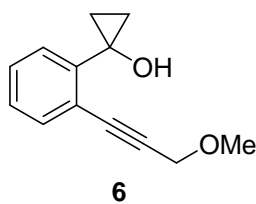

To a 50 mL flask was added **S40** (268 mg, 1.10 mmol) followed by degassed DCM (10 mL). TFA (770  $\mu$ L, 11.0 mmol) was slowly added to the solution. After being stirred at rt for 1 h under Ar atmosphere, the reaction was diluted with water and extracted with EtOAc. The organic layer was washed with sat. aq.  $\text{NaHCO}_3$  and brine, dried over  $\text{MgSO}_4$ , and concentrated. The residue was purified by silica gel column

chromatography (Hexane/EtOAc = 10:1) to furnish **6** (154 mg, 69%) as a yellow liquid. **Analytical data for 6:**  $^1\text{H}$ -NMR (400 MHz,  $\text{CDCl}_3$ )  $\delta$  7.48 (dd,  $J$  = 7.5, 1.6 Hz, 1H), 7.35 (dd,  $J$  = 7.5, 1.6 Hz, 1H), 7.29 (dt,  $J$  = 7.5, 1.6 Hz, 1H), 7.24 (dt,  $J$  = 7.5, 1.6 Hz, 1H), 4.39 (s, 2H), 3.47 (s, 3H), 1.19 (dd,  $J$  = 7.1, 5.3 Hz, 2H), 1.00 (dd,  $J$  = 7.1, 5.3 Hz, 2H);  $^{13}\text{C}$ -NMR (101 MHz,  $\text{CDCl}_3$ )  $\delta$  144.4, 133.0, 128.8, 128.0, 127.7, 122.8, 90.5, 85.0, 60.6, 57.9, 57.1, 14.3; IR (neat) 3411, 1095  $\text{cm}^{-1}$ ; HRMS (DART)  $m/z$   $[\text{M} + \text{NH}_4]^+$  calcd for  $\text{C}_{13}\text{H}_{14}\text{O}_2 \cdot \text{NH}_4$  220.1338, found 220.1318

4. Representative Procedure for the Rhodium-Catalyzed Cycloisomerization of **1**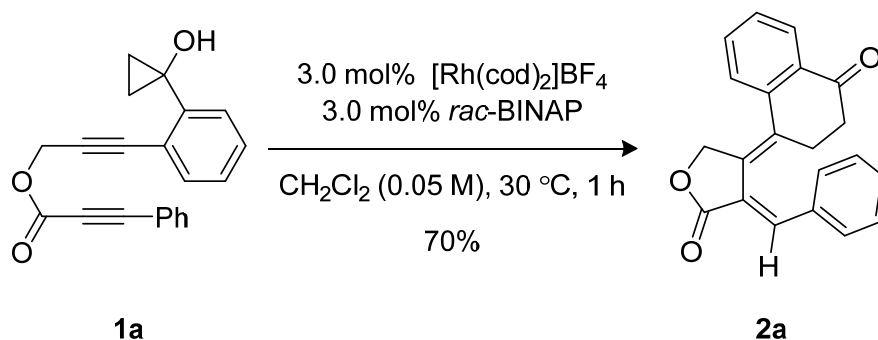

$[\text{Rh}(\text{cod})_2]\text{BF}_4$  (1.21 mg, 0.00300 mmol) and *rac*-BINAP (1.88 mg, 0.00300 mmol) were dissolved in degassed DCM (1.0 mL) and the mixture was stirred at 30  $^\circ\text{C}$  for 10 min under Ar atmosphere. The reaction tube was evacuated and refilled with  $\text{H}_2$  using a balloon, which was repeated 3 times. After stirring at 30  $^\circ\text{C}$  for 1 h under  $\text{H}_2$  atmosphere, the reaction tube was evacuated and refilled with Ar using a balloon, which was repeated 3 times. To the resulting mixture was added a DCM (1.0 mL) solution of **1a** (31.6 mg, 0.100 mmol). After stirring at 30  $^\circ\text{C}$  for 1 h, the resulting solution was concentrated *in vacuo*. The crude was then purified by silica gel column chromatography (Hexane/EtOAc = 10:1) to give **2a** (22.1 mg, 70%) as a yellow solid (mp 246.5–248.3  $^\circ\text{C}$ ).

## 5. Characterization of Exocyclic Dienes 2 and 3

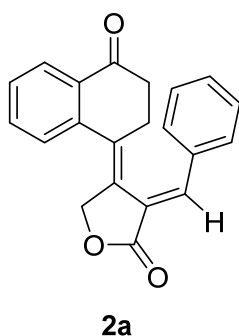

Recrystallization from isopropanol at rt afforded pure **2a** as a yellow crystal. **Analytical data for 2a:**  $^1\text{H-NMR}$  (400 MHz,  $\text{CDCl}_3$ )  $\delta$  8.12 (d,  $J = 7.8$  Hz, 1H), 7.68 (s, 1H), 7.65 (t,  $J = 7.8$  Hz, 1H), 7.55–7.50 (m, 3H), 7.41–7.36 (m, 3H), 7.22 (d,  $J = 7.8$  Hz, 1H), 5.23 (s, 2H), 2.60 (t,  $J = 6.9$  Hz, 2H), 2.42 (t,  $J = 6.9$  Hz, 2H);  $^{13}\text{C-NMR}$  (101 MHz,  $\text{CDCl}_3$ )  $\delta$  196.4, 171.0, 139.5, 137.5, 136.1, 134.9, 133.7, 132.2, 130.5, 130.0, 129.8, 128.9, 128.04, 127.96, 123.6, 70.5, 38.9, 32.7; IR (KBr) 1763, 1687  $\text{cm}^{-1}$ ; HRMS (DART)  $m/z$   $[\text{M}^+ \text{NH}_4]^+$  calcd for  $\text{C}_{21}\text{H}_{16}\text{O}_3 \cdot \text{NH}_4$  334.1443, found 334.1414

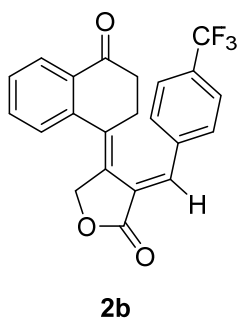

According to the representative procedure, yellow solid (mp 168.6–169.8  $^\circ\text{C}$ ) was obtained (68% yield). **Analytical data for 2b:**  $^1\text{H-NMR}$  (400 MHz,  $\text{CDCl}_3$ )  $\delta$  8.14 (d,  $J = 7.8$  Hz, 1H), 7.68–7.65 (m, 6H), 7.54 (t,  $J = 7.8$  Hz, 1H), 7.22 (d,  $J = 7.8$  Hz, 1H), 5.22 (s, 2H), 2.62 (t,  $J = 6.9$  Hz, 2H), 2.37 (t,  $J = 6.6$  Hz, 2H);  $^{13}\text{C-NMR}$  (101 MHz,  $\text{CDCl}_3$ )  $\delta$  195.9, 170.4, 139.0, 138.2, 137.4, 135.1, 133.8, 132.3, 130.2, 129.9, 128.2, 128.1, 128.0, 125.9, 125.9, 125.9, 125.8, 70.5, 38.7, 32.7;  $^{19}\text{F-NMR}$  (376 MHz,  $\text{CDCl}_3$ )  $\delta$  –63.9; IR (KBr) 1766, 1689  $\text{cm}^{-1}$ ; HRMS (DART)  $m/z$   $[\text{M}^+ \text{H}]^+$  calcd for  $\text{C}_{22}\text{H}_{15}\text{F}_3\text{O}_3 \cdot \text{H}$  385.1052, found 385.1031

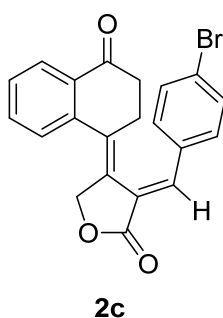

According to the representative procedure, yellow solid (mp 163.0–164.5  $^\circ\text{C}$ ) was obtained (61% yield). **Analytical data for 2c:**  $^1\text{H-NMR}$  (400 MHz,  $\text{CDCl}_3$ )  $\delta$  8.14 (dd,  $J = 7.6, 1.2$  Hz, 1H), 7.65 (dt,  $J = 7.6, 1.2$  Hz, 1H), 7.60 (s, 1H), 7.55–7.51 (m, 3H), 7.40 (d,  $J = 8.7$  Hz, 2H), 7.20 (d,  $J = 7.3$  Hz, 1H), 5.19 (s, 2H), 2.62 (t,  $J = 6.6$  Hz, 2H), 2.41 (t,  $J = 6.6$  Hz, 2H);  $^{13}\text{C-NMR}$  (101 MHz,  $\text{CDCl}_3$ )  $\delta$  196.1, 170.7, 139.2, 136.5, 135.9, 133.8, 133.8, 132.2, 131.3, 130.0, 128.6, 128.1, 128.0, 124.8, 124.2, 70.4, 38.8, 32.8; IR (KBr) 1761, 1689  $\text{cm}^{-1}$ ; HRMS (DART)  $m/z$   $[\text{M}^+ \text{H}]^+$  calcd for  $\text{C}_{21}\text{H}_{15}\text{BrO}_3 \cdot \text{H}$  395.0283, found 395.0275

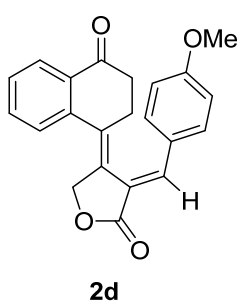

According to the representative procedure, yellow solid (mp 179.3–180.9  $^\circ\text{C}$ ) was obtained (46% yield). **Analytical data for 2d:**  $^1\text{H-NMR}$  (400 MHz,  $\text{CDCl}_3$ )  $\delta$  8.13 (dd,  $J = 7.8, 0.9$  Hz, 1H), 7.65 (dt,  $J = 7.8, 0.9$  Hz, 1H), 7.63 (s, 1H), 7.53–7.49 (m, 3H), 7.21 (d,  $J = 7.8$  Hz, 1H), 6.90 (d,  $J = 8.7$  Hz, 2H), 5.17 (s, 2H), 3.84 (s, 3H), 2.62 (t,  $J = 6.6$  Hz, 2H), 2.50 (t,  $J = 6.6$  Hz, 2H);  $^{13}\text{C-NMR}$  (101 MHz,  $\text{CDCl}_3$ )  $\delta$  196.6, 171.4, 161.4, 139.7, 137.4, 135.1, 133.7, 132.2, 132.1, 129.6, 128.00, 127.96, 127.4, 121.0, 114.3, 70.4, 55.5, 39.0, 32.8; IR (KBr) 1745, 1675  $\text{cm}^{-1}$ ; HRMS (DART)  $m/z$   $[\text{M}^+ \text{H}]^+$  calcd for  $\text{C}_{22}\text{H}_{18}\text{O}_4 \cdot \text{H}$  347.1283, found 347.1269

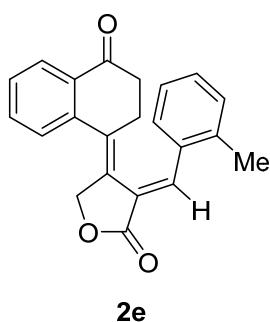

The reaction was performed at 30 °C for 2 h. Yellow solid (mp 186.5–188.0 °C) was obtained (53% yield). Recrystallization from isopropanol at rt afforded pure **2e** as a yellow crystal. **Analytical data for 2e:**  $^1\text{H-NMR}$  (400 MHz,  $\text{CDCl}_3$ )  $\delta$  8.10 (dd,  $J = 7.8, 1.4$  Hz, 1H), 7.85 (s, 1H), 7.63 (dt,  $J = 7.8, 1.4$  Hz, 1H), 7.52–7.47 (m, 2H), 7.29–7.25 (m, 2H), 7.20 (d,  $J = 7.3$  Hz, 1H), 7.11 (t,  $J = 7.3$  Hz, 1H), 5.21 (s, 2H), 2.57 (t,  $J = 6.9$  Hz, 2H), 2.46 (s, 3H), 2.24 (t,  $J = 6.9$  Hz, 2H);  $^{13}\text{C-NMR}$  (101 MHz,  $\text{CDCl}_3$ )  $\delta$  196.4, 171.0, 139.5, 138.6, 136.2, 135.5, 134.3, 133.7, 132.2, 131.1, 130.3, 129.7, 128.5, 128.0, 127.9, 127.6, 126.1, 124.4, 70.4, 38.8, 31.9, 20.2; IR (KBr) 1749, 1678  $\text{cm}^{-1}$ ; HRMS (DART)  $m/z$   $[\text{M} + \text{NH}_4]^+$  calcd for  $\text{C}_{22}\text{H}_{18}\text{O}_3 \cdot \text{NH}_4$  348.1600, found 368.1598

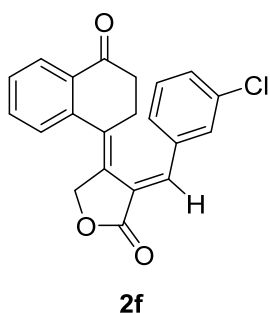

According to the representative procedure, yellow solid (mp 175.2–176.5 °C) was obtained (85% yield). **Analytical data for 2f:**  $^1\text{H-NMR}$  (400 MHz,  $\text{CDCl}_3$ )  $\delta$  8.14 (dd,  $J = 7.6, 1.2$  Hz, 1H), 7.66 (dt,  $J = 7.6, 1.2$  Hz, 1H), 7.60 (s, 1H), 7.54 (dt,  $J = 7.6, 1.2$  Hz, 1H), 7.50 (s, 1H), 7.44–7.41 (m, 1H), 7.34–7.33 (m, 2H), 7.22 (d,  $J = 6.9$  Hz, 1H), 5.19 (s, 2H), 2.62 (t,  $J = 6.9$  Hz, 2H), 2.41 (t,  $J = 6.6$  Hz, 2H);  $^{13}\text{C-NMR}$  (101 MHz,  $\text{CDCl}_3$ )  $\delta$  196.1, 170.6, 139.2, 136.9, 136.7, 135.5, 134.9, 133.8, 132.3, 130.4, 130.1, 130.1, 129.6, 128.4, 128.1, 128.0, 127.9, 124.9, 70.5, 38.8, 32.7; IR (KBr) 1753, 1684  $\text{cm}^{-1}$ ; HRMS (DART)  $m/z$   $[\text{M} + \text{NH}_4]^+$  calcd for  $\text{C}_{21}\text{H}_{15}\text{O}_3\text{Cl} \cdot \text{NH}_4$  368.1054, found 368.1074

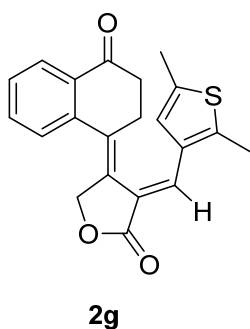

According to the representative procedure, brown solid (mp 175.4–175.9 °C) was obtained (55% yield). **Analytical data for 2g:**  $^1\text{H-NMR}$  (400 MHz,  $\text{CDCl}_3$ )  $\delta$  8.14 (dd,  $J = 7.8, 1.4$  Hz, 1H), 7.64 (dt,  $J = 7.8, 1.4$  Hz, 1H), 7.57 (s, 1H), 7.51 (t,  $J = 7.8$  Hz, 1H), 7.20 (d,  $J = 7.8$  Hz, 1H), 6.77 (s, 1H), 5.12 (s, 2H), 2.64 (t,  $J = 6.2$  Hz, 2H), 2.56 (t,  $J = 6.2$  Hz, 2H), 2.53 (s, 3H), 2.33 (s, 3H);  $^{13}\text{C-NMR}$  (101 MHz,  $\text{CDCl}_3$ )  $\delta$  196.7, 171.6, 144.8, 139.9, 136.4, 135.6, 133.7, 132.8, 132.2, 130.1, 129.8, 129.5, 127.9, 124.1, 120.8, 70.4, 39.2, 32.2, 15.3, 14.0; IR (KBr) 1757, 1681  $\text{cm}^{-1}$ ; HRMS (DART)  $m/z$   $[\text{M} + \text{H}]^+$  calcd for  $\text{C}_{21}\text{H}_{18}\text{O}_3\text{S} \cdot \text{H}$  351.1055, found 351.1051

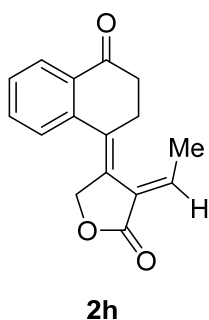

According to the representative procedure, white solid (mp 173.8–174.9 °C) was obtained (62% yield). **Analytical data for 2h:**  $^1\text{H-NMR}$  (400 MHz,  $\text{CDCl}_3$ )  $\delta$  8.14 (dd,  $J = 7.8, 1.4$  Hz, 1H), 7.61 (dt,  $J = 7.8, 1.4$  Hz, 1H), 7.50 (t,  $J = 7.8$  Hz, 1H), 7.12 (d,  $J = 7.8$  Hz, 1H), 6.93 (q,  $J = 7.5$  Hz, 1H), 5.05 (s, 2H), 2.86 (t,  $J = 6.2$  Hz, 2H), 2.77 (t,  $J = 6.2$  Hz, 2H), 2.02 (d,  $J = 7.5$  Hz, 3H);  $^{13}\text{C-NMR}$  (101 MHz,  $\text{CDCl}_3$ )  $\delta$  196.4, 170.2, 139.6, 137.3, 134.1, 133.7, 132.1, 129.6, 128.7, 128.0, 128.0, 127.9, 70.6, 39.4, 31.9, 18.3; IR (KBr) 1762, 1693  $\text{cm}^{-1}$ ; HRMS (DART)  $m/z$   $[\text{M} + \text{NH}_4]^+$  calcd for  $\text{C}_{16}\text{H}_{14}\text{O}_3 \cdot \text{NH}_4$  272.1287, found 272.1268

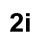

The reaction was performed using [Rh(cod)<sub>2</sub>]BF<sub>4</sub> (10 mol%) and *rac*-BINAP (10 mol%) at 50 °C in DCE and white solid (mp 166.7–167.3 °C) was obtained (56% yield). Recrystallization from isopropanol at rt afforded pure **2j** as a colorless crystal. **Analytical data for 2j:** <sup>1</sup>H-NMR (400 MHz, CDCl<sub>3</sub>) δ 8.12 (d, *J* = 7.6 Hz, 1H), 7.60 (t, *J* = 7.6 Hz, 1H), 7.50 (t, *J* = 7.6 Hz, 1H), 7.07 (d, *J* = 7.6 Hz, 1H), 6.82 (s, 1H), 4.94 (s, 2H), 3.02 (t, *J* = 6.6 Hz, 2H), 2.77 (t, *J* = 6.6 Hz, 2H), 1.24 (s, 9H); <sup>13</sup>C-NMR (101 MHz, CDCl<sub>3</sub>) δ 196.2, 170.7, 152.2, 139.7, 136.9, 133.7, 132.0, 129.7, 129.2, 128.1, 127.9, 122.7, 70.4, 39.5, 35.5, 17.0; IR (KBr) 1765, 1684 cm<sup>-1</sup>; HRMS (DART) *m/z* [M+H]<sup>+</sup> calcd for C<sub>19</sub>H<sub>20</sub>O<sub>3</sub>•H 297.1491, found 297.1491.

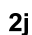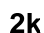

The reaction was performed using  $[\text{Rh}(\text{cod})_2]\text{BF}_4$  (10 mol%) and *rac*-BINAP (10 mol%) at 60 °C in DCE and orange solid (mp 275.3–278.1 °C) was obtained (46% yield). **Analytical data for 2k:**  $^1\text{H}$ -NMR (400 MHz,  $\text{CDCl}_3$ )  $\delta$  8.13 (dd,  $J = 7.6, 1.4$  Hz, 1H), 7.60 (dt,  $J = 7.6, 1.4$  Hz, 1H), 7.50 (t,  $J = 7.6$  Hz, 1H), 7.07 (d,  $J = 7.6$  Hz, 1H), 6.62 (s, 1H), 4.94 (s, 2H), 3.04 (t,  $J = 6.2$  Hz, 2H), 2.78 (d,  $J = 6.2$  Hz, 2H), 2.02 (br s, 3H), 1.82 (br s, 6H), 1.74 (br d,  $J = 12.4$  Hz, 3H), 1.67 (br d,  $J = 12.4$  Hz, 3H);  $^{13}\text{C}$ -NMR (101 MHz,  $\text{CDCl}_3$ )  $\delta$  196.3, 170.8, 151.8, 139.8, 136.8, 133.7, 132.0, 130.0, 129.6, 128.2, 127.8, 122.5, 70.4, 40.2, 39.5, 37.9, 36.4, 33.4, 27.9; IR (KBr) 3427, 2906, 1765, 1712  $\text{cm}^{-1}$ ; HRMS (DART)  $m/z$   $[\text{M}+\text{NH}_4]^+$  calcd for  $\text{C}_{25}\text{H}_{26}\text{O}_3 \cdot \text{NH}_4$  392.2226, found 392.2206

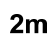

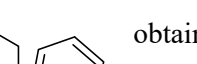

According to the representative procedure, pale-yellow solid (mp 194.4–195.8 °C) was obtained (62% yield). **Analytical data for 2m:** <sup>1</sup>H-NMR (400 MHz, CDCl<sub>3</sub>) δ 7.70 (s, 1H), 7.63–7.58 (m, 1H), 7.55–7.52 (m, 2H), 7.41–7.38 (m, 3H), 7.20 (ddd, *J* = 11.0, 8.2, 0.9 Hz, 1H), 7.02 (d, *J* = 7.8 Hz, 1H), 5.15 (s, 2H), 2.58 (t, *J* = 6.9 Hz, 2H), 2.39 (t, *J* = 6.9 Hz, 2H); <sup>13</sup>C-NMR (101 MHz, CDCl<sub>3</sub>) δ 194.1, 170.6, 162.2 (d, *J* = 269.7 Hz), 141.6, 138.1, 135.4 (d, *J* = 2.9 Hz), 134.7, 134.6, 130.6, 129.9 (2C), 129.7, 128.8 (2C), 123.8 (d, *J* = 3.8 Hz), 123.3, 120.5 (d, *J* = 4.7 Hz), 118.3 (d, *J* = 23.1 Hz), 70.2, 39.7, 32.2; <sup>19</sup>F-NMR (376 MHz, CDCl<sub>3</sub>) δ –110.8; IR (KBr) 1752, 1678 cm<sup>–1</sup>; HRMS (DART) *m/z* [M+NH<sub>4</sub>]<sup>+</sup> calcd for C<sub>21</sub>H<sub>15</sub>FO<sub>3</sub>•NH<sub>4</sub> 352.1349, found 352.1367

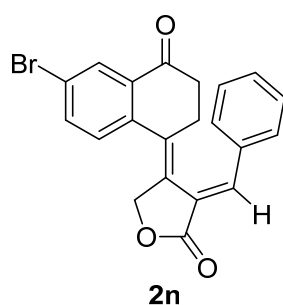

According to the representative procedure, yellow solid (mp 199.8–201.2 °C) was obtained (40% yield). **Analytical data for 2n:**  $^1\text{H-NMR}$  (400 MHz,  $\text{CDCl}_3$ )  $\delta$  8.24 (d,  $J = 2.3$  Hz, 1H), 7.76 (dd,  $J = 8.2, 2.3$  Hz, 1H), 7.71 (s, 1H), 7.53–7.51 (m, 2H), 7.41–7.38 (m, 3H), 7.08 (d,  $J = 8.2$  Hz, 1H), 5.16 (s, 2H), 2.59 (t,  $J = 6.9$  Hz, 2H), 2.40 (t,  $J = 6.9$  Hz, 2H);  $^{13}\text{C-NMR}$  (101 MHz,  $\text{CDCl}_3$ )  $\delta$  195.0, 170.6, 138.0, 136.4, 134.74, 134.69, 133.3, 130.9, 130.6, 129.9, 129.4, 128.8, 124.1, 123.3, 70.1, 38.6, 32.3; IR (KBr) 1759, 1680  $\text{cm}^{-1}$ ; HRMS (ESI)  $m/z$   $[\text{M}+\text{Na}]^+$  calcd for  $\text{C}_{21}\text{H}_{15}\text{BrO}_3 \cdot \text{Na}$  417.0102, found 417.0099.

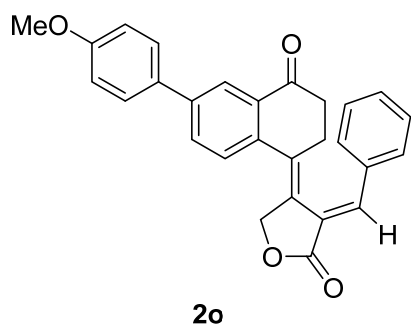**2o**

According to the representative procedure, orange solid (mp 212.3–214.0 °C) was obtained (59% yield). **Analytical data for 2o:**  $^1\text{H-NMR}$  (400 MHz,  $\text{CDCl}_3$ )  $\delta$  8.33 (d,  $J = 2.2$  Hz, 1H), 7.84 (dd,  $J = 8.4, 2.2$  Hz, 1H), 7.69 (s, 1H), 7.63–7.61 (m, 2H), 7.56–7.54 (m, 2H), 7.39–7.38 (m, 3H), 7.28–7.26 (m, 1H), 7.02 (d,  $J = 8.5$  Hz, 2H), 5.24 (s, 2H), 3.88 (s, 3H), 2.63 (t,  $J = 6.9$  Hz, 2H), 2.43 (t,  $J = 6.9$  Hz, 2H);  $^{13}\text{C-NMR}$  (101 MHz,  $\text{CDCl}_3$ )  $\delta$  196.5, 171.0, 160.0, 142.1, 137.4, 137.2, 135.7, 134.9,

132.4, 131.4, 131.3, 130.4, 129.9, 128.8, 128.6, 128.5, 128.1, 125.4, 123.6, 114.5, 70.4, 55.4, 38.9, 32.6; IR (KBr) 1765, 1681  $\text{cm}^{-1}$ ; HRMS (ESI)  $m/z$   $[\text{M}+\text{Na}]^+$  calcd for  $\text{C}_{28}\text{H}_{22}\text{O}_4 \cdot \text{Na}$  445.1416, found 445.1398

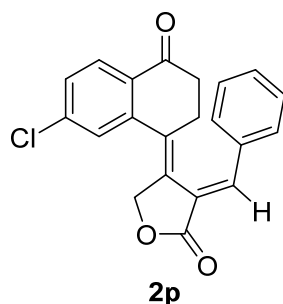**2p**

According to the representative procedure, yellow solid (mp 188.0–189.5 °C) was obtained (72% yield). **Analytical data for 2p:**  $^1\text{H-NMR}$  (400 MHz,  $\text{CDCl}_3$ )  $\delta$  8.06 (d,  $J = 8.2$  Hz, 1H), 7.72 (s, 1H), 7.54–7.52 (m, 2H), 7.47 (dd,  $J = 8.2, 1.8$  Hz, 1H), 7.41–7.39 (m, 3H), 7.19 (d,  $J = 1.8$  Hz, 1H), 5.21 (s, 2H), 2.59 (t,  $J = 6.6$  Hz, 2H), 2.40 (t,  $J = 6.6$  Hz, 2H);  $^{13}\text{C-NMR}$  (101 MHz,  $\text{CDCl}_3$ )  $\delta$  195.2, 170.5, 140.7, 140.1, 138.3, 134.7, 134.6, 130.7, 130.4, 130.0, 129.9, 129.8, 129.5, 128.9, 127.6, 123.2, 77.3, 77.0, 76.7, 70.0, 38.6, 32.5; IR (KBr) 1763, 1689  $\text{cm}^{-1}$ ; HRMS (DART)  $m/z$

$[\text{M}+\text{H}]^+$  calcd for  $\text{C}_{21}\text{H}_{15}\text{ClO}_3 \cdot \text{H}$  351.0788, found 351.0789

Rhodium-Catalyzed Cycloisomerization of **1q**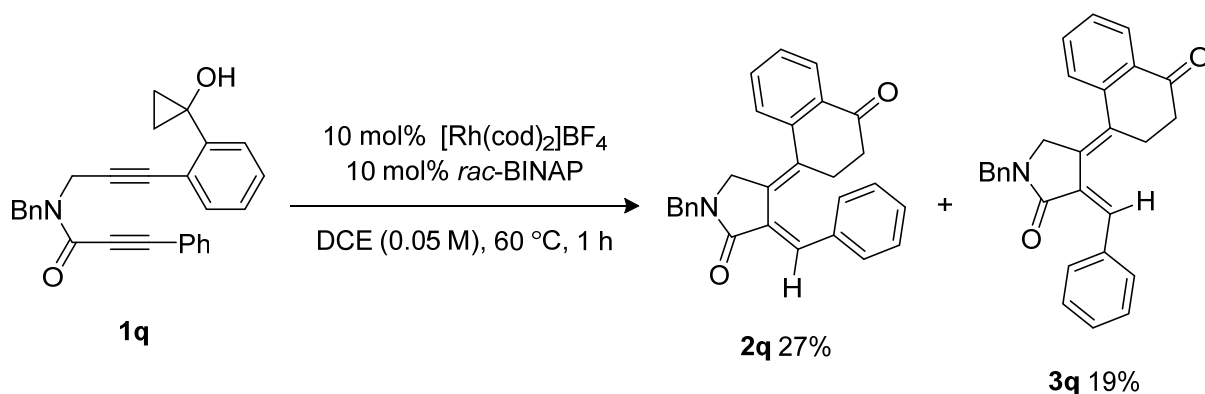

$[\text{Rh}(\text{cod})_2]\text{BF}_4$  (4.07 mg, 0.0100 mmol) and *rac*-BINAP (6.23 mg, 0.0100 mmol) were dissolved in degassed DCE (1.0 mL) and the mixture was stirred at 30 °C for 10 min under Ar atmosphere. The reaction tube was evacuated and refilled with  $\text{H}_2$  using a balloon, which was repeated 3 times. After stirring at 30 °C for 1 h under  $\text{H}_2$  atmosphere, the reaction tube was evacuated and refilled with Ar using a balloon, which was repeated 3 times. To the resulting mixture was added a DCE (1.0 mL) solution of **1q** (40.6 mg, 0.100 mmol). After stirring at 60 °C for 1 h, the resulting solution was concentrated *in vacuo*. The crude product was then purified by silica gel column chromatography (Hexane/EtOAc = 10:1) to give **2q** (11.0 mg, 27%) and **3q** (7.70 mg, 19%).

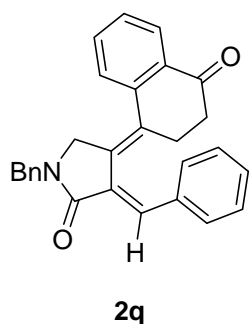

**Analytical data for 2q:** yellow solid (mp 169.9–170.9 °C);  $^1\text{H}$ -NMR (400 MHz,  $\text{CDCl}_3$ )  $\delta$  8.07 (dd,  $J = 7.6, 1.2$  Hz, 1H), 7.58 (s, 1H), 7.56 (dt,  $J = 7.6, 1.2$  Hz, 1H), 7.51 (d,  $J = 7.6$  Hz, 2H), 7.44 (t,  $J = 7.6$  Hz, 1H), 7.37–7.28 (m, 9H), 4.67 (s, 2H), 4.22 (s, 2H), 2.55 (t,  $J = 6.6$  Hz, 2H), 2.41 (t,  $J = 6.6$  Hz, 2H);  $^{13}\text{C}$ -NMR (101 MHz,  $\text{CDCl}_3$ )  $\delta$  197.0, 168.6, 140.4, 136.2, 136.0, 134.6, 133.5, 132.6, 132.2, 130.0, 129.6, 129.3, 129.1, 129.0, 128.7, 128.3, 128.1, 127.9, 127.7, 51.5, 47.1, 39.0, 32.4; IR (KBr) 1691, 1619  $\text{cm}^{-1}$ ; HRMS (DART)  $m/z$   $[\text{M} + \text{H}]^+$  calcd for  $\text{C}_{28}\text{H}_{23}\text{NO}_2 \cdot \text{H}$  406.1807, found

406.1808

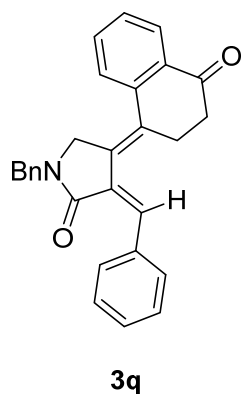

**Analytical data for 3q:** yellow solid (mp 175.6–179.4 °C);  $^1\text{H}$ -NMR (400 MHz,  $\text{CDCl}_3$ )  $\delta$  8.08 (dd,  $J = 7.6, 1.4$  Hz, 1H), 8.02 (d,  $J = 6.8$  Hz, 2H), 7.51 (dt,  $J = 7.6, 1.4$  Hz, 1H), 7.43–7.21 (m, 10H), 7.10 (s, 1H), 4.58 (s, 2H), 4.18 (s, 2H), 3.32 (t,  $J = 6.6$  Hz, 2H), 2.74 (t,  $J = 6.6$  Hz, 2H);  $^{13}\text{C}$ -NMR (101 MHz,  $\text{CDCl}_3$ )  $\delta$  197.0, 168.6, 140.4, 136.2, 136.0, 134.6, 133.5, 132.6, 132.2, 130.0, 129.6, 129.3, 129.1, 129.0, 128.7, 128.3, 128.1, 127.9, 127.7, 51.5, 47.1, 39.0, 32.4; IR (KBr) 1691, 1619  $\text{cm}^{-1}$ ; HRMS (DART)  $m/z$   $[\text{M} + \text{H}]^+$  calcd for  $\text{C}_{28}\text{H}_{23}\text{NO}_2 \cdot \text{H}$  406.1807, found 406.1793

Rhodium-Catalyzed Cycloisomerization of **1r**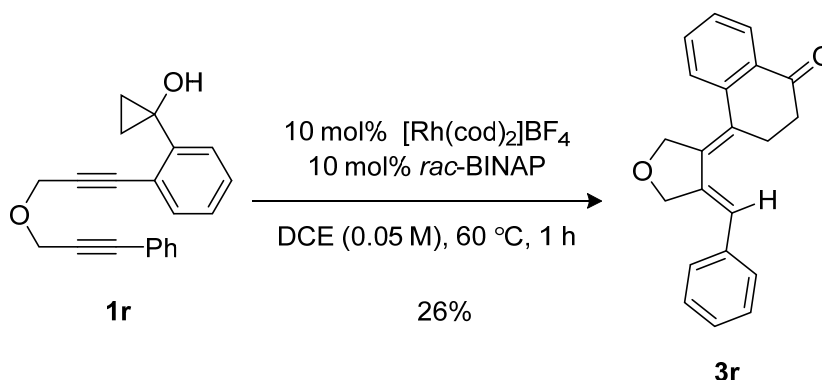

$[\text{Rh}(\text{cod})_2]\text{BF}_4$  (4.07 mg, 0.0100 mmol) and *rac*-BINAP (6.23 mg, 0.0100 mmol) were dissolved in degassed DCE (1.0 mL) and the mixture was stirred at 30 °C for 10 min under Ar atmosphere. The reaction tube was evacuated and refilled with  $\text{H}_2$  using a balloon, which was repeated 3 times. After stirring at 30 °C for 1 h under  $\text{H}_2$  atmosphere, the reaction tube was evacuated and refilled with Ar using a balloon, which was repeated 3 times. To the resulting mixture was added a DCE (1.0 mL) solution of **1r** (30.2 mg, 0.100 mmol). After stirring at 60 °C for 1 h, the resulting solution was concentrated *in vacuo*. The crude product was then purified by silica gel column chromatography (Hexane/EtOAc = 10:1) to give **3r** (7.86 mg, 26%).

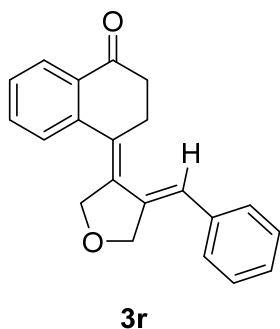

**Analytical data for 3r:** white solid (mp 119.0–122.4 °C);  $^1\text{H}$ -NMR (400 MHz,  $\text{CDCl}_3$ )  $\delta$  8.10 (dd,  $J = 7.8, 1.6$  Hz, 1H), 7.56 (dt,  $J = 7.8, 1.6$  Hz, 1H), 7.44–7.39 (m, 3H), 7.32–7.24 (m, 3H), 7.08 (d,  $J = 7.8$  Hz, 1H), 6.87 (t,  $J = 2.7$  Hz, 1H), 4.82 (d,  $J = 2.7$  Hz, 2H), 4.66 (s, 2H), 3.38 (t,  $J = 6.9$  Hz, 2H), 2.80 (t,  $J = 6.9$  Hz, 2H);  $^{13}\text{C}$ -NMR (101 MHz,  $\text{CDCl}_3$ ) 197.3, 142.2, 138.8, 137.7, 136.6, 133.4, 131.7, 130.3, 128.8, 128.4, 128.3, 127.8, 127.4, 127.0, 70.9, 70.0, 39.5, 30.3; IR (KBr) 1680  $\text{cm}^{-1}$ ; HRMS (DART)  $m/z$   $[\text{M} + \text{H}]^+$  calcd for  $\text{C}_{21}\text{H}_{18}\text{O}_2$  303.1385, found 303.1397

Rhodium-Catalyzed Cycloisomerization of **1s**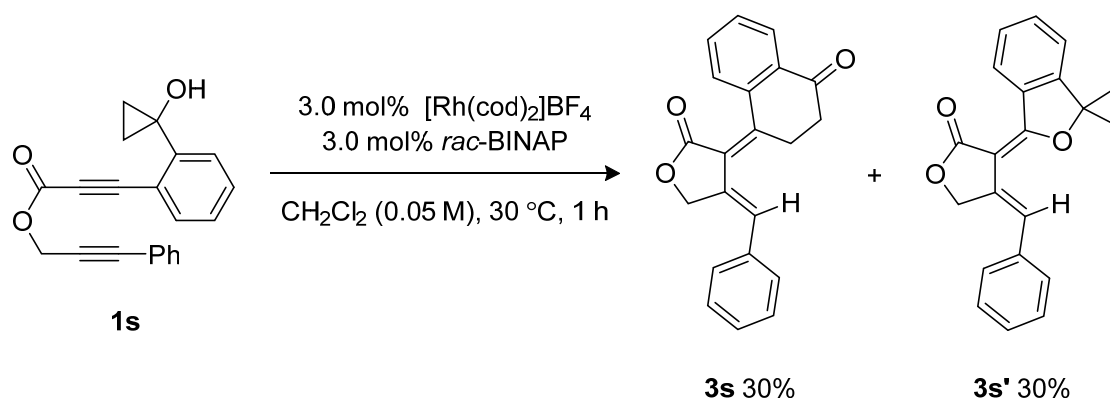

$[\text{Rh}(\text{cod})_2]\text{BF}_4$  (1.21 mg, 0.00300 mmol) and *rac*-BINAP (1.88 mg, 0.00300 mmol) were dissolved in degassed DCM (1.0 mL) and the mixture was stirred at 30 °C for 10 min under Ar atmosphere. The reaction tube was evacuated and refilled with  $\text{H}_2$  using a balloon, which was repeated 3 times. After stirring at 30 °C for 1 h under  $\text{H}_2$  atmosphere, the reaction tube was evacuated and refilled with Ar using a balloon, which was repeated 3 times. To the resulting mixture was added a DCM (1.0 mL) solution of **1s** (31.6 mg, 0.100 mmol). After stirring at 30 °C for 1 h, the resulting solution was concentrated *in vacuo*. The crude product was then purified by silica gel column chromatography (Hexane/EtOAc = 10:1) to give **3s** (9.16 mg, 30%) and **3s'** (9.23 mg, 30%).

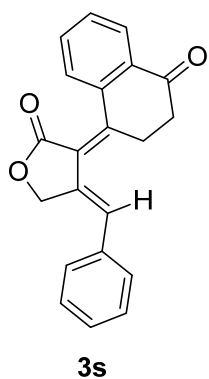

Recrystallization from hexane and EtOAc at rt afforded pure **3s** as a yellow crystal. **Analytical data for 3o:** yellow solid (mp 170.8–172.3 °C);  $^1\text{H}$ -NMR (400 MHz,  $\text{CDCl}_3$ )  $\delta$  8.08–8.06 (m, 1H), 7.88–7.86 (m, 1H), 7.60–7.53 (m, 2H), 7.44 (t,  $J$  = 7.6 Hz, 2H), 7.38–7.34 (m, 1H), 7.23 (d,  $J$  = 7.6 Hz, 2H), 6.98 (t,  $J$  = 2.3 Hz, 1H), 5.20 (d,  $J$  = 2.3 Hz, 2H), 3.46 (t,  $J$  = 6.9 Hz, 2H), 2.84 (t,  $J$  = 6.9 Hz, 2H);  $^{13}\text{C}$ -NMR (101 MHz,  $\text{CDCl}_3$ )  $\delta$  196.0, 167.5, 150.2, 137.9, 135.3, 134.7, 132.3, 132.1, 131.9, 131.1, 129.2, 129.0, 128.8, 128.6, 126.5, 123.1, 68.9, 38.7, 33.7; IR (KBr) 1751, 1681  $\text{cm}^{-1}$ ; HRMS (DART)  $m/z$   $[\text{M} + \text{H}]^+$  calcd for  $\text{C}_{21}\text{H}_{16}\text{O}_3 \cdot \text{H}$  317.1178, found 317.1170

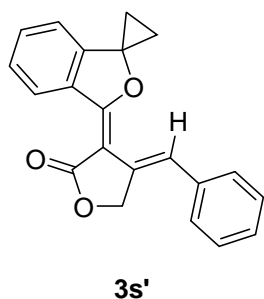

**Analytical data for 3s':** orange solid (mp 199.2–200.0 °C);  $^1\text{H}$ -NMR (400 MHz,  $\text{CDCl}_3$ )  $\delta$  9.48 (dd,  $J$  = 7.1, 1.6 Hz, 1H), 7.54–7.47 (m, 2H), 7.40–7.36 (m, 2H), 7.30 (t,  $J$  = 2.3 Hz, 1H), 7.25–7.18 (m, 3H), 7.02–7.00 (m, 1H), 5.23 (d,  $J$  = 2.3 Hz, 2H), 1.89 (dd,  $J$  = 8.2, 6.0 Hz, 2H), 1.47 (dd,  $J$  = 8.2, 6.0 Hz, 2H);  $^{13}\text{C}$ -NMR (101 MHz,  $\text{CDCl}_3$ )  $\delta$  171.6, 166.8, 146.4, 137.7, 134.9, 131.9, 131.9, 129.0, 128.8, 128.4, 126.8, 121.7, 116.7, 100.5, 72.1, 69.9, 15.9; IR (KBr) 1732, 1570  $\text{cm}^{-1}$ ; HRMS (DART)  $m/z$   $[\text{M} + \text{H}]^+$  calcd for  $\text{C}_{21}\text{H}_{16}\text{O}_3 \cdot \text{H}$  317.1178, found 317.1167



## 6. Determination of Structures of 2q, 3q, 3r, and 3s'

The structure of **2q** was assigned by NOESY experiments. The arrows shown below indicate the observed cross peaks.

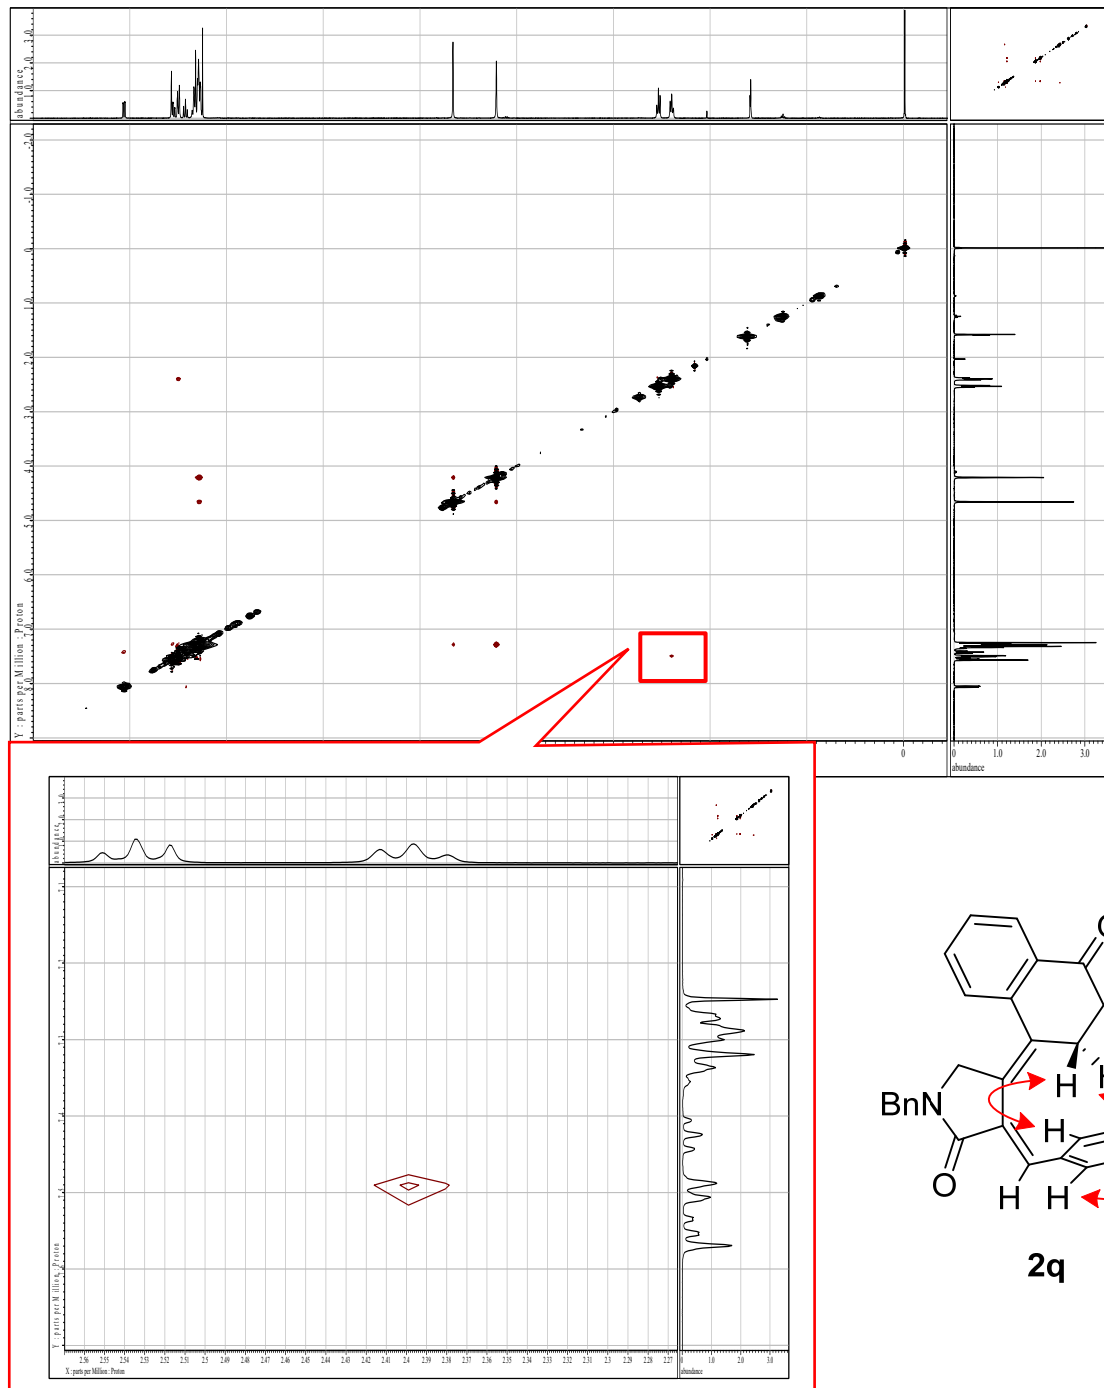

The structure of **3q** was assigned by NOESY experiments. The arrow shown below indicate the observed cross peaks.

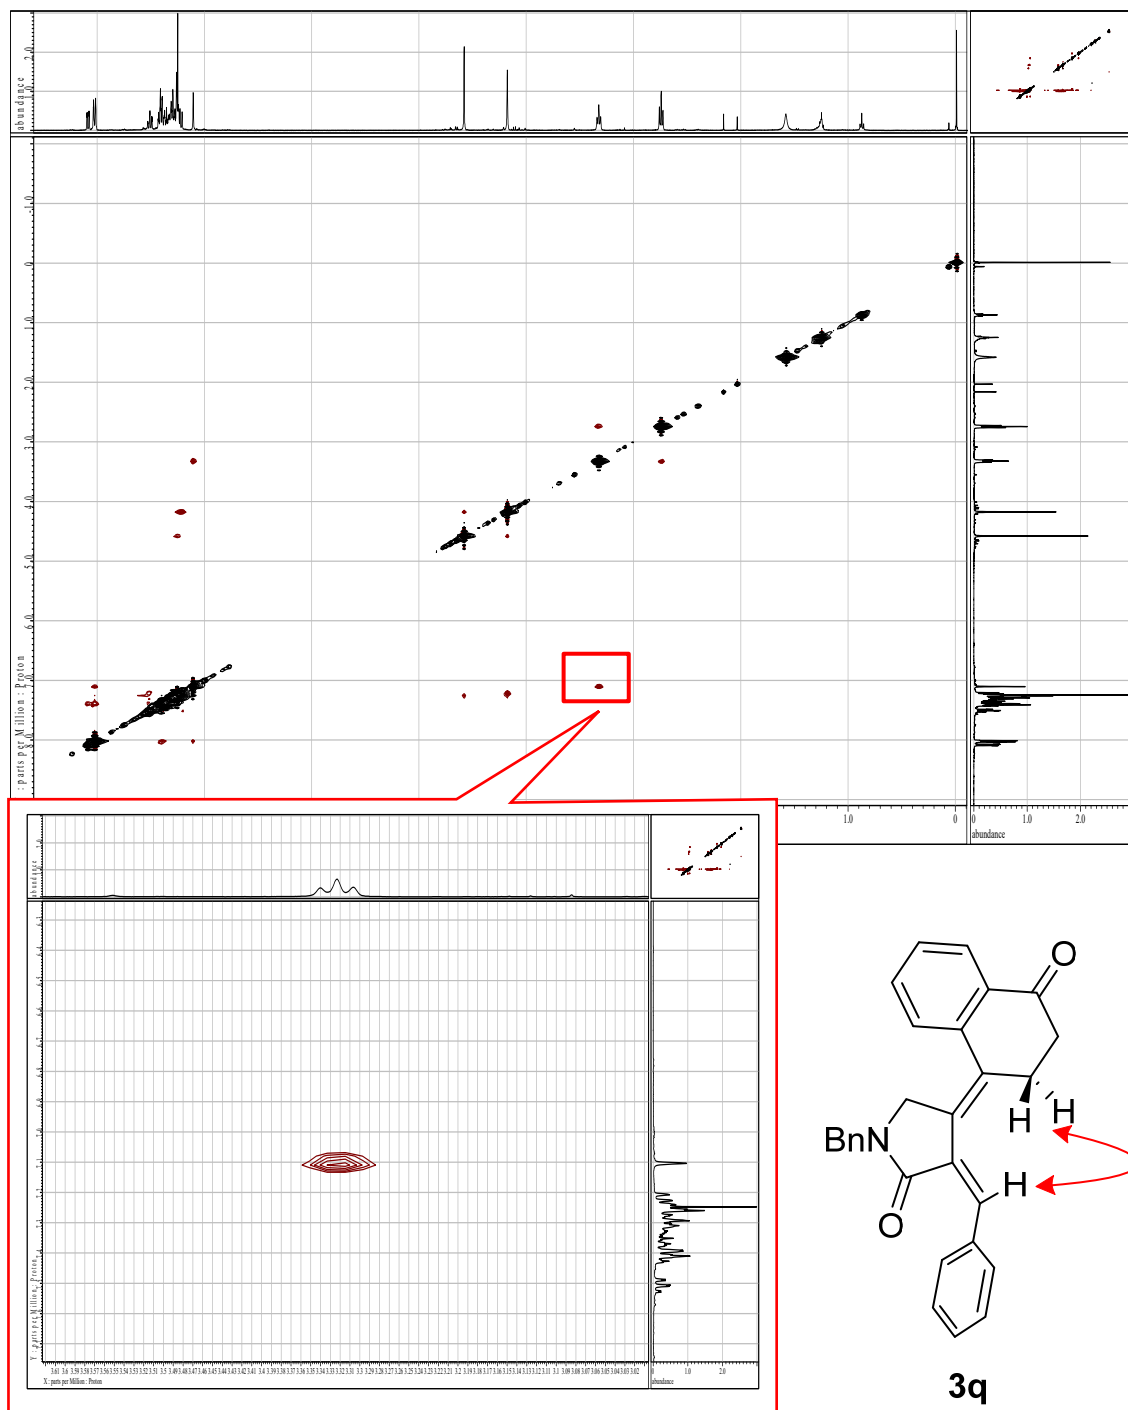

The structure of **3r** was assigned by NOESY experiments. The arrow shown below indicate the observed cross peaks.

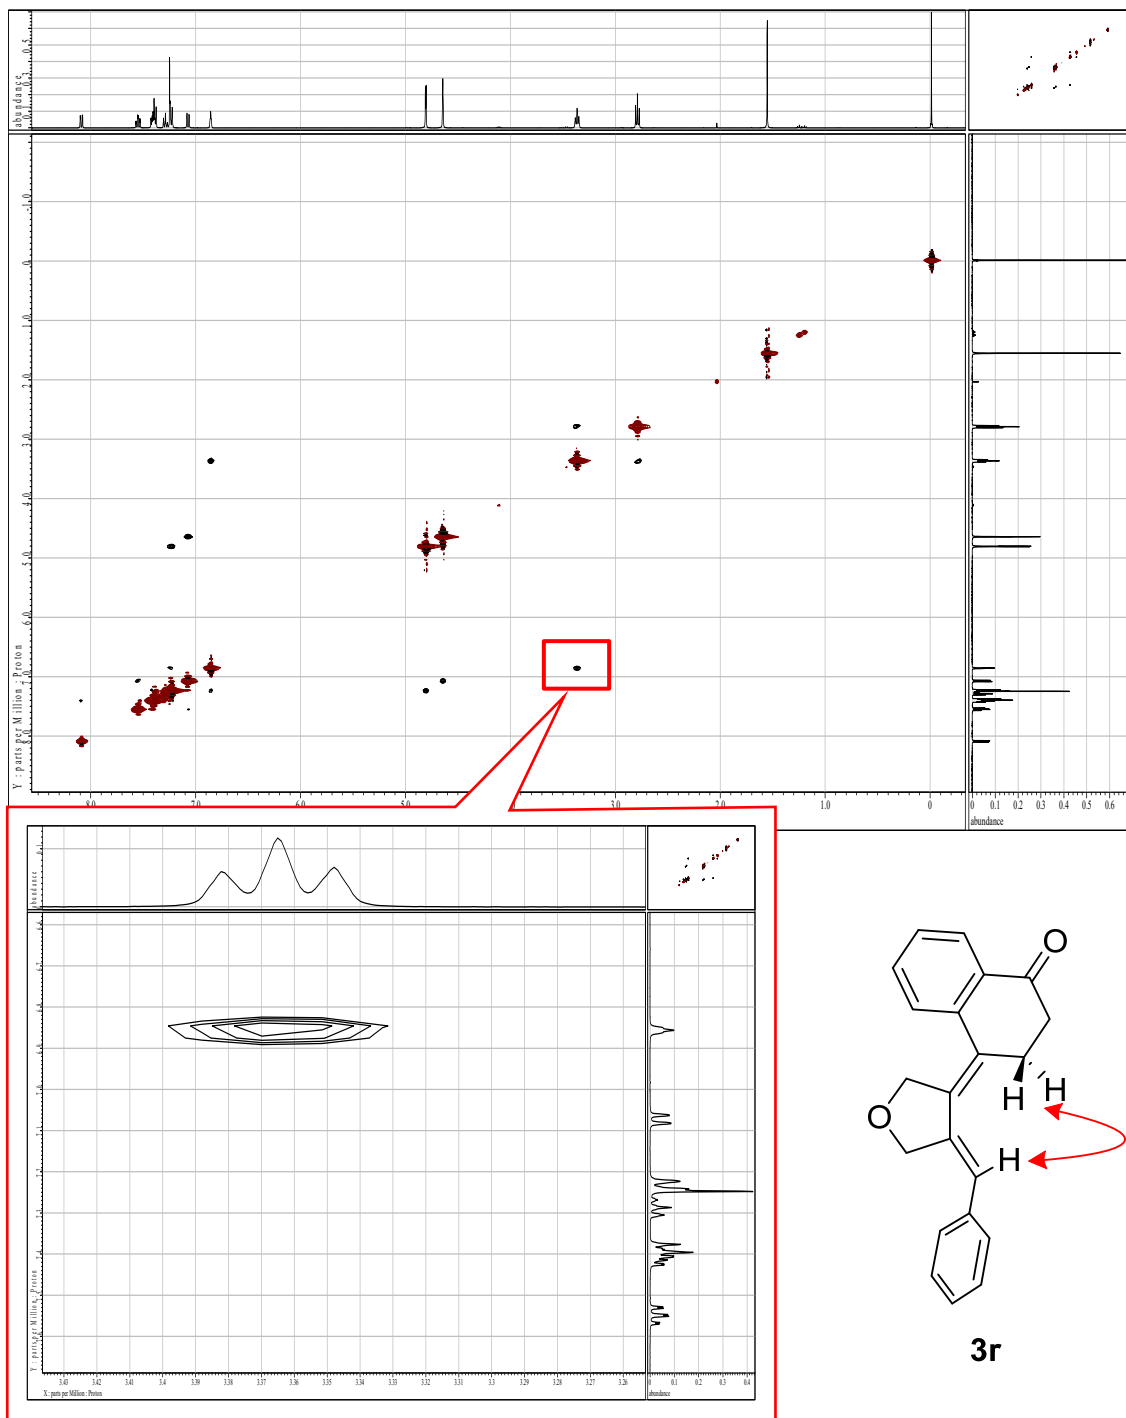

The structure of **3s'** was assigned by NOESY experiments. The arrows shown below indicate the observed cross peaks.

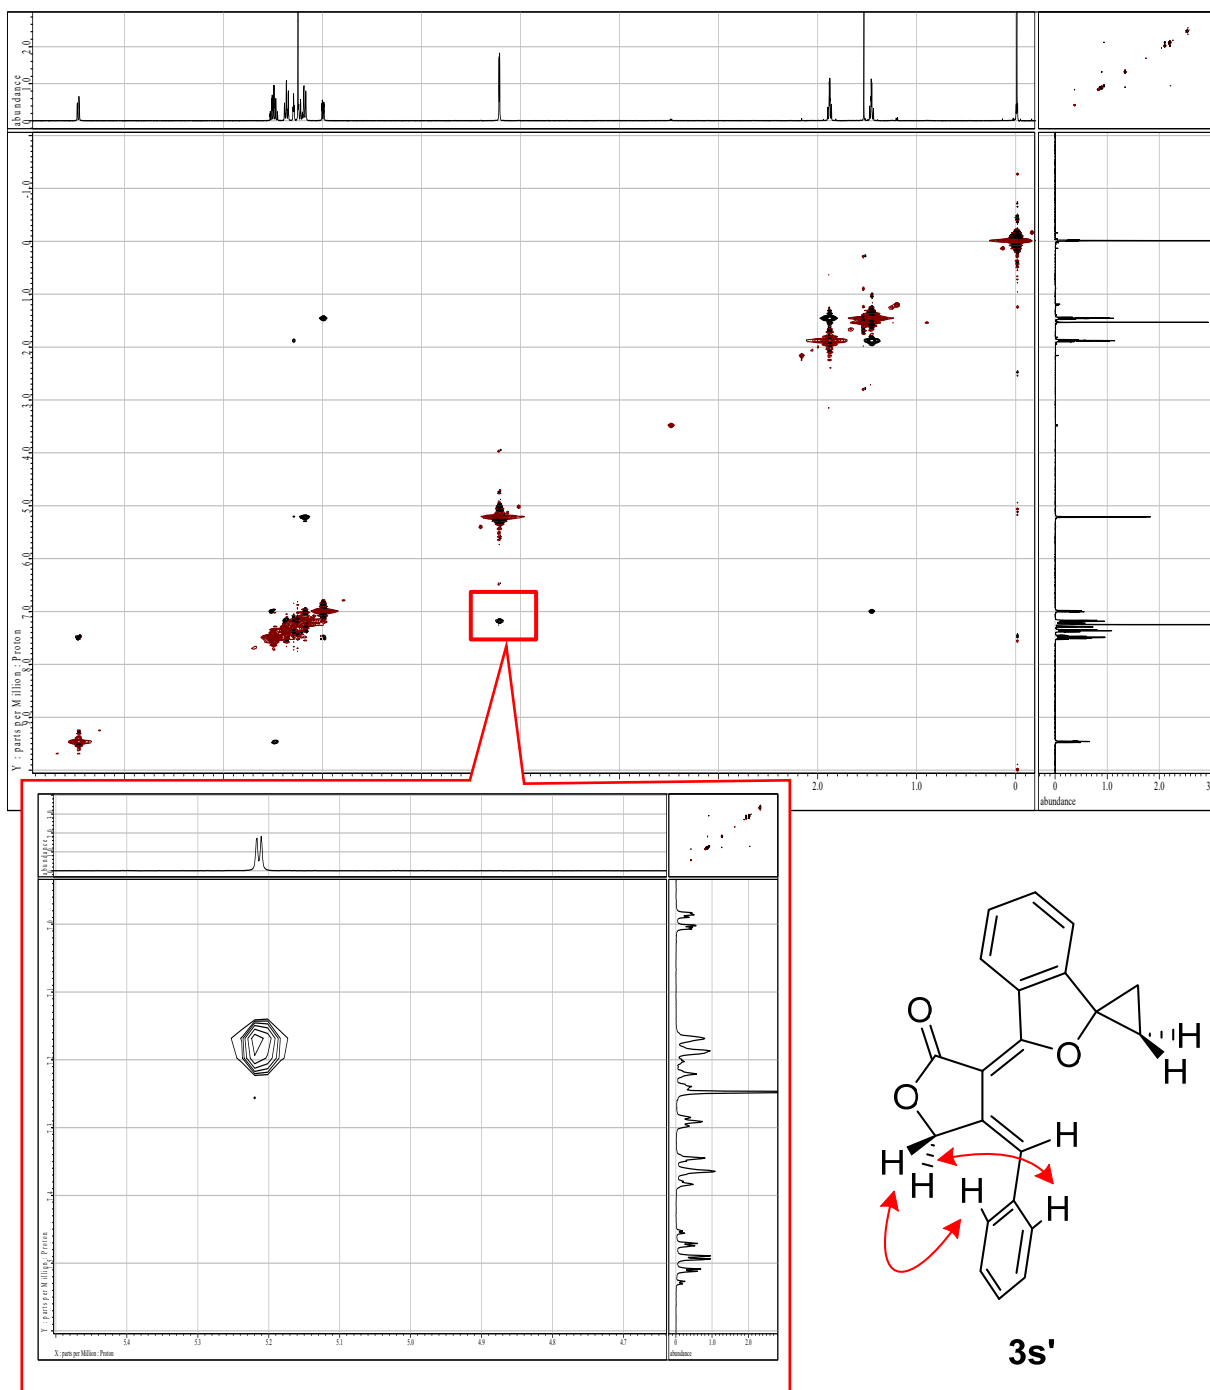

## 7. Control Experiments

### Ring-Opening Reaction of Phenylcyclopropanol **4**

Phenylcyclopropanol **4** was prepared according to the previous report<sup>19</sup>. Characterization of **5** was identical to the previous reports<sup>20</sup>.

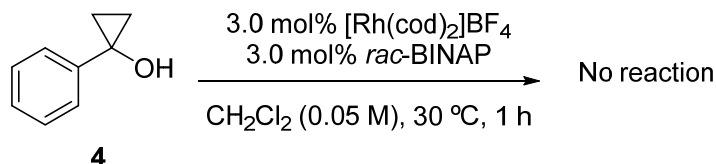

[Rh(cod)<sub>2</sub>]BF<sub>4</sub> (1.21 mg, 0.00300 mmol) and *rac*-BINAP (1.88 mg, 0.00300 mmol) were dissolved in degassed DCM (1.0 mL) and the mixture was stirred at 30 °C for 10 min under Ar atmosphere. The reaction tube was evacuated and refilled with H<sub>2</sub> using a balloon, which was repeated 3 times. After stirring at 30 °C for 1 h under H<sub>2</sub> atmosphere, the reaction tube was evacuated and refilled with Ar using a balloon, which was repeated 3 times. To the resulting mixture was added a DCM (1.0 mL) solution of **4** (13.4 mg, 0.100 mmol). After stirring at 30 °C for 1 h, the resulting solution was concentrated *in vacuo*. The crude material was then purified by silica gel column chromatography (Hexane/EtOAc = 4:1) to recover starting material **4** (12.4 mg, RSM 92%).

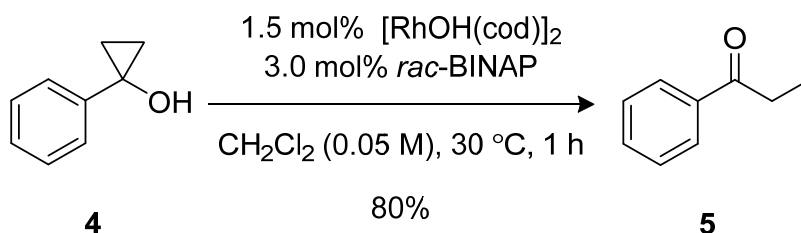

[RhOH(cod)]<sub>2</sub> (1.21 mg, 0.00300 mmol), *rac*-BINAP (1.88 mg, 0.00300 mmol) and **4** (13.4 mg, 0.100 mmol) were dissolved in degassed DCM (2.0 mL). After stirring at 30 °C for 1 h, the resulting solution was concentrated *in vacuo*. The crude material was then purified by silica gel column chromatography (Hexane/EtOAc = 10:1) to give **5** (10.6 mg, 80%).

### Reaction of Alkyne substrate **6**

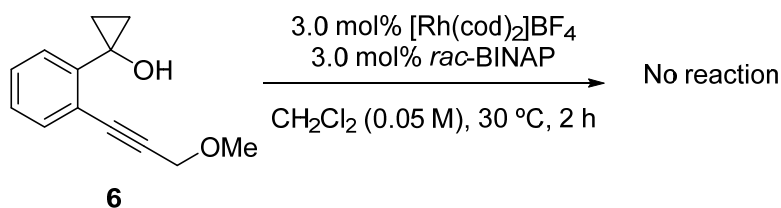

[Rh(cod)<sub>2</sub>]BF<sub>4</sub> (1.21 mg, 0.00300 mmol) and *rac*-BINAP (1.88 mg, 0.00300 mmol) were dissolved in degassed DCM (1.0 mL) and the mixture was stirred at 30 °C for 10 min under Ar atmosphere. The reaction tube was evacuated and refilled with H<sub>2</sub> using a balloon, which was repeated 3 times. After stirring at 30 °C for 1 h under H<sub>2</sub> atmosphere, the reaction tube was evacuated and refilled with Ar using a balloon, which was repeated

3 times. To the resulting mixture was added a DCM (1.0 mL) solution of **6** (20.2 mg, 0.100 mmol). After stirring at 30 °C for 2 h, the resulting solution was concentrated. The crude was then purified by a silica gel column chromatography (Hexane/EtOAc = 10:1) to recover starting material **6**.

#### Rhodium-Catalyzed Cycloisomerization of **1h** in the presence of Phenylacetylene

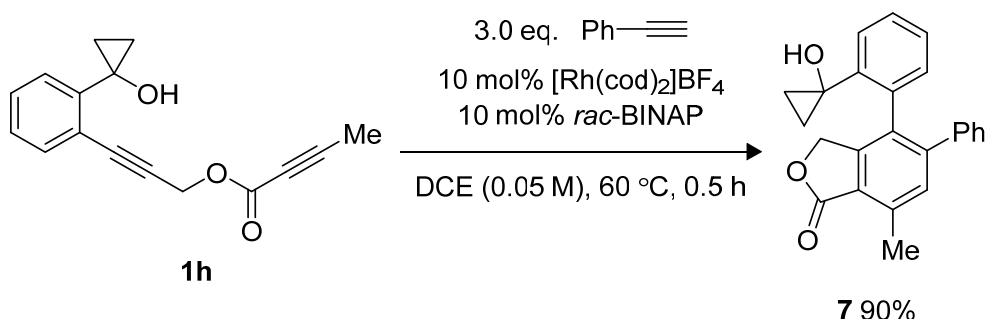

[Rh(cod)<sub>2</sub>]BF<sub>4</sub> (4.07 mg, 0.0100 mmol) and *rac*-BINAP (6.23 mg, 0.0100 mmol) were dissolved in degassed DCE (1.0 mL) and the mixture was stirred at 30 °C for 10 min under Ar atmosphere. The reaction tube was evacuated and refilled with H<sub>2</sub> using a balloon, which was repeated 3 times. After stirring at 30 °C for 1 h under H<sub>2</sub> atmosphere, the reaction tube was evacuated and refilled with Ar using a balloon, which was repeated 3 times. To the resulting mixture was added a DCE (1.0 mL) solution of **1h** (31.6 mg, 0.100 mmol) and phenylacetylene (32.0 μL, 0.300 mmol). After stirring at 60 °C for 0.5 h, the resulting solution was concentrated *in vacuo*. The crude material was then purified by silica gel column chromatography (Hexane/EtOAc = 10:1) to give **7** (32.2 mg, 90%). Recrystallization from hexane and EtOAc at rt afforded pure **7** as a colorless crystal. **Analytical data for 7:** colorless crystal (mp 170.6–172.0 °C); <sup>1</sup>H-NMR (400 MHz, CDCl<sub>3</sub>) δ 7.47-7.44 (m, 2H), 7.39-7.36 (m, 2H), 7.31-7.29 (m, 1H), 7.27-7.22 (m, 5H), 5.11 (d, *J* = 15.6 Hz, 1H), 4.74 (d, *J* = 15.6 Hz, 1H), 2.80 (s, 3H), 1.09 (s, 1H), 0.80-0.75 (m, 1H), 0.61-0.56 (m, 1H), 0.28-0.24 (m, 2H); <sup>13</sup>C-NMR (101 MHz, CDCl<sub>3</sub>) δ 171.3, 147.4, 145.3, 139.5, 139.4, 135.2, 132.9, 132.3, 131.5, 130.8, 129.8, 128.7, 128.5, 128.1, 127.9, 122.5, 69.0, 56.3, 17.3, 15.1, 14.5; IR (KBr) 3464, 1720 cm<sup>-1</sup>; HRMS (DART) *m/z* [M+ H]<sup>+</sup> calcd for C<sub>24</sub>H<sub>20</sub>O<sub>3</sub>•H 357.1491, found 357.1486

### 8. Variable-Temperature $^1\text{H}$ NMR Spectroscopy of **2j**

Exocyclic dienes **2** have fluxional nature. Helical isomerization process (Figure S1) can be monitored by variable-temperature NMR study in  $\text{CD}_2\text{Cl}_2$ . The methylene protons ( $\text{H}_\text{A}$  and  $\text{H}_\text{B}$ ) of **2j** are enantiotopic, appearing as a sharp singlet peak at 22  $^\circ\text{C}$  (Figure S2). As the temperature decreases, the protons gradually appear as two doublets, and become diastereotopic below  $-60$   $^\circ\text{C}$ . This implies the two isomers are in rapid equilibrium at 22  $^\circ\text{C}$ , but are distinguished each other below  $-60$   $^\circ\text{C}$  in the NMR time scale.

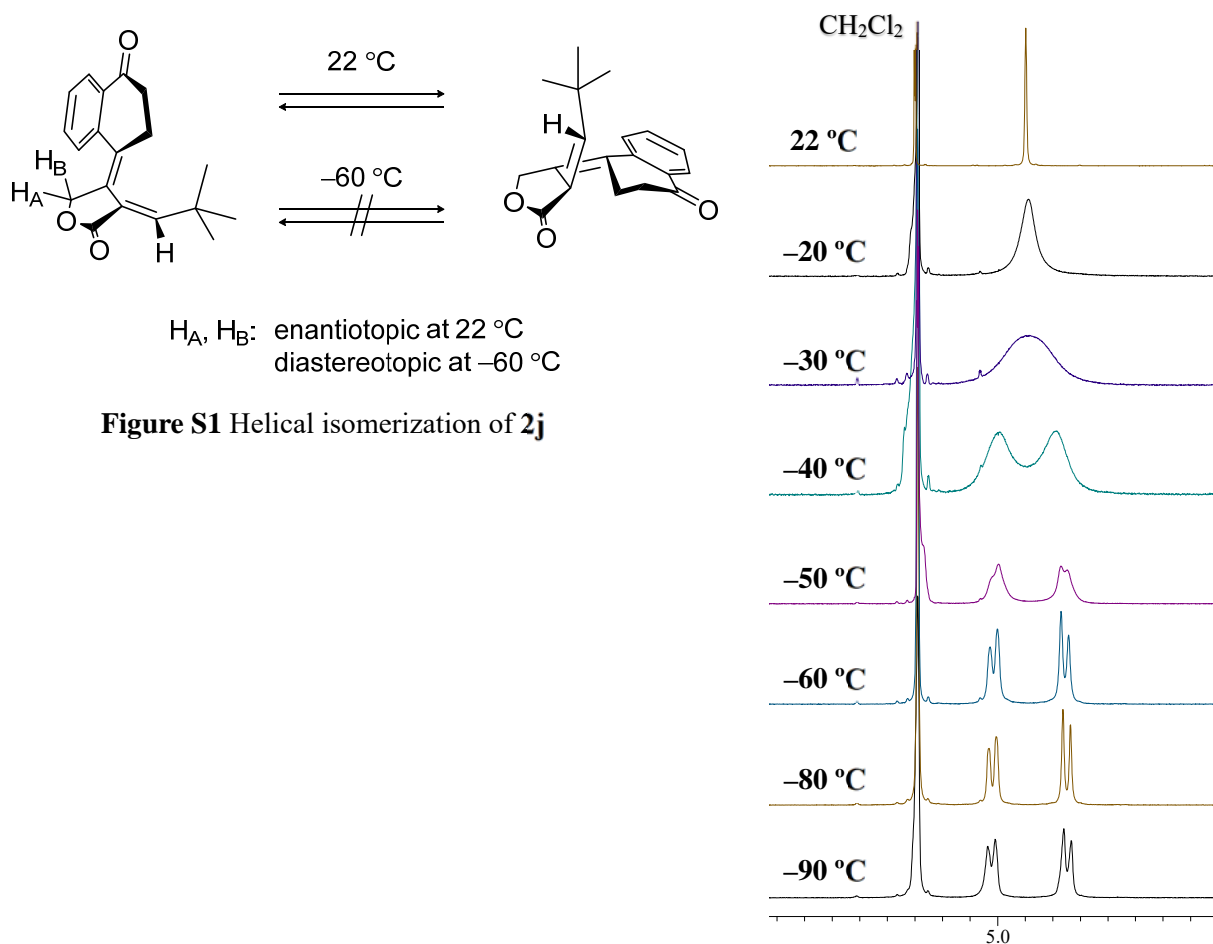

**Figure S2** Variable-temperature  $^1\text{H}$  NMR behavior of **2j** (only  $\text{H}_\text{A}$  and  $\text{H}_\text{B}$  shown)

## 9. X-Ray Diffraction Analysis of 2a

A single crystal of **2a** was mounted on a glass fiber, and diffraction data were collected in  $\theta$  ranges specified in Table S4 at 123 K on a Rigaku R-Axis Rapid diffractometer with graphite monochromatized Cu-K $\alpha$  radiation ( $\lambda = 1.54187$  Å). The Lorentz polarization absorption correction was applied. The structure was solved by direct methods and refined by the full-matrix least-squares on  $F^2$ . All non-hydrogen atoms were refined with anisotropic displacement parameters. All hydrogen atoms were refined using the riding model. Final refinement details are compiled in Table S4. The supplementary crystallographic data for this paper (CCDC2007772) can also be obtained free of charge via [www.ccdc.cam.ac.uk/conts/retrieving.html](http://www.ccdc.cam.ac.uk/conts/retrieving.html) (or from the Cambridge Crystallographic Data Centre, 12, Union Road, Cambridge CB2 1EZ, UK; fax: +44 1223 336033; or [deposit@ccdc.cam.ac.uk](mailto:deposit@ccdc.cam.ac.uk))

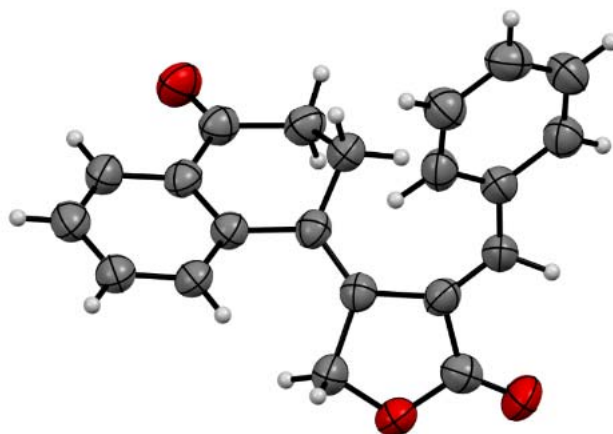

**Figure S3** ORTEP plot of **2a**.

**Table S4** Selected crystallographic data and collection parameters for **2a**.

|                                 |                                                |                                                |                                                                                                                     |
|---------------------------------|------------------------------------------------|------------------------------------------------|---------------------------------------------------------------------------------------------------------------------|
| formula                         | C <sub>21</sub> H <sub>16</sub> O <sub>3</sub> | crystal size, mm                               | 0.60 x 0.30 x 0.10                                                                                                  |
| FW                              | 316.36                                         | maximum 2 $\theta$ , deg                       | 136.4                                                                                                               |
| crystal system                  | orthorhombic                                   | reflections collected                          | 62519                                                                                                               |
| space group                     | Pbca (#61)                                     | independent reflections [ $R(\text{int})$ ]    | 5578 [ $R(\text{int}) = 0.1638$ ]                                                                                   |
| $a$ , Å                         | 8.8744(6)                                      | max. and min. transmission                     | 0.929/0.601                                                                                                         |
| $b$ , Å                         | 11.4021(7)                                     | goodness-of-fit on $F^2$                       | 1.069                                                                                                               |
| $c$ , Å                         | 60.208(4)                                      | $R_1$ [ $I > 2\sigma(I)$ ]                     | 0.1092                                                                                                              |
| volume, Å <sup>3</sup>          | 6092.2(7)                                      | $R$ , $wR_2$ (all data)                        | 0.1600, 0.3326                                                                                                      |
| $Z$                             | 16                                             | Weighting scheme                               | $R_1 = \Sigma   F_o  -  F_c   / \Sigma  F_o $<br>$wR_2 = [ \Sigma (w(F_o^2 - F_c^2)^2) / \Sigma w(F_o^2)^2 ]^{1/2}$ |
| $D$ (calcd), Mg m <sup>-3</sup> | 1.380                                          | largest diff. peak and hole, e Å <sup>-3</sup> | 0.61 and -0.61                                                                                                      |
| $\mu$ , cm <sup>-1</sup>        | 7.395                                          |                                                |                                                                                                                     |
| $F(000)$                        | 2656.00                                        |                                                |                                                                                                                     |



### X-Ray Diffraction Analysis of 2e

A single crystal of **2e** was mounted on a glass fiber, and diffraction data were collected in  $\theta$  ranges specified in Table S5 at 123 K on a Rigaku R-Axis Rapid diffractometer with graphite monochromatized Cu-K $\alpha$  radiation ( $\lambda = 1.54187$  Å). The Lorentz polarization absorption correction was applied. The structure was solved by direct methods and refined by the full-matrix least-squares on  $F^2$ . All non-hydrogen atoms were refined with anisotropic displacement parameters. All hydrogen atoms were refined using the riding model. Final refinement details are compiled in Table S5. The supplementary crystallographic data for this paper (CCDC2007776) can also be obtained free of charge via [www.ccdc.cam.ac.uk/conts/retrieving.html](http://www.ccdc.cam.ac.uk/conts/retrieving.html) (or from the Cambridge Crystallographic Data Centre, 12, Union Road, Cambridge CB2 1EZ, UK; fax: +44 1223 336033; or [deposit@ccdc.cam.ac.uk](mailto:deposit@ccdc.cam.ac.uk))

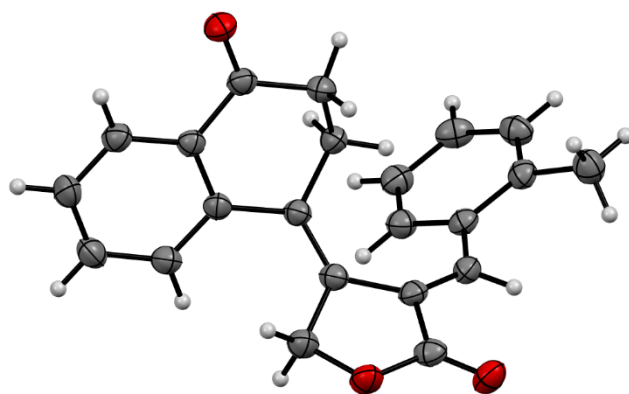

Figure S4 ORTEP plot of **2e**.

Table S5 Selected crystallographic data and collection parameters for **2e**.

|                                 |                                                |                                                |                                                                                                                     |
|---------------------------------|------------------------------------------------|------------------------------------------------|---------------------------------------------------------------------------------------------------------------------|
| formula                         | C <sub>22</sub> H <sub>18</sub> O <sub>3</sub> | crystal size, mm                               | 0.20 x 0.20 x 0.20                                                                                                  |
| FW                              | 330.38                                         | maximum 2 $\theta$ , deg                       | 136.4                                                                                                               |
| crystal system                  | monoclinic                                     | reflections collected                          | 17148                                                                                                               |
| space group                     | P2 <sub>1</sub> /c (#14)                       | independent reflections [ $R(\text{int})$ ]    | 3013 [ $R(\text{int}) = 0.1009$ ]                                                                                   |
| $a$ , Å                         | 15.8736(5)                                     | max. and min. transmission                     | 0.406/0.868                                                                                                         |
| $b$ , Å                         | 9.6592(3)                                      | goodness-of-fit on $F^2$                       | 1.268                                                                                                               |
| $c$ , Å                         | 10.7426(3)                                     | $R_1$ [ $I > 2\sigma(I)$ ]                     | 0.0773                                                                                                              |
| volume, Å <sup>3</sup>          | 1644.14(9)                                     | $R$ , $wR_2$ (all data)                        | 0.1118, 0.3302                                                                                                      |
| $Z$                             | 4                                              | Weighting scheme                               | $R_1 = \Sigma   F_o  -  F_c   / \Sigma  F_o $<br>$wR_2 = [ \Sigma (w(F_o^2 - F_c^2)^2) / \Sigma w(F_o^2)^2 ]^{1/2}$ |
| $D$ (calcd), Mg m <sup>-3</sup> | 1.335                                          | largest diff. peak and hole, e Å <sup>-3</sup> | 0.48 and -0.49                                                                                                      |
| $\mu$ , cm <sup>-1</sup>        | 7.073                                          |                                                |                                                                                                                     |
| $F(000)$                        | 696.00                                         |                                                |                                                                                                                     |

### X-Ray Diffraction Analysis of 2j

A single crystal of **2j** was mounted on a glass fiber, and diffraction data were collected in  $\theta$  ranges specified in Table S6 at 123 K on a Rigaku R-Axis Rapid diffractometer with graphite monochromatized Cu-K $\alpha$  radiation ( $\lambda = 1.54187$  Å). The Lorentz polarization absorption correction was applied. The structure was solved by direct methods and refined by the full-matrix least-squares on  $F^2$ . All non-hydrogen atoms were refined with anisotropic displacement parameters. All hydrogen atoms were refined using the riding model. Final refinement details are compiled in Table S6. The supplementary crystallographic data for this paper (CCDC2007773) can also be obtained free of charge via [www.ccdc.cam.ac.uk/conts/retrieving.html](http://www.ccdc.cam.ac.uk/conts/retrieving.html) (or from the Cambridge Crystallographic Data Centre, 12, Union Road, Cambridge CB2 1EZ, UK; fax: +44 1223 336033; or [deposit@ccdc.cam.ac.uk](mailto:deposit@ccdc.cam.ac.uk))

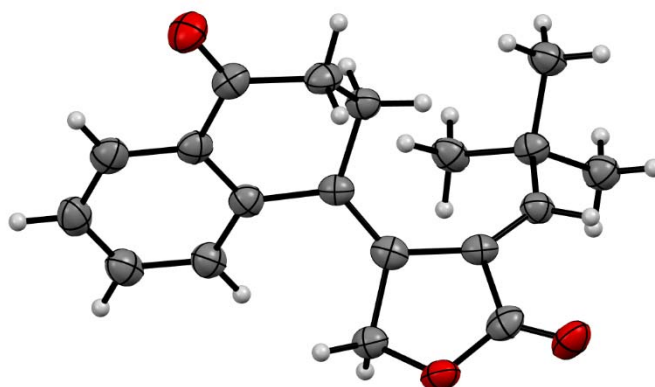

Figure S5 ORTEP plot of **2j**.

Table S6 Selected crystallographic data and collection parameters for **2j**.

|                                 |                                                |                                                |                                                                                                                     |
|---------------------------------|------------------------------------------------|------------------------------------------------|---------------------------------------------------------------------------------------------------------------------|
| formula                         | C <sub>19</sub> H <sub>20</sub> O <sub>3</sub> | crystal size, mm                               | 0.40 x 0.20 x 0.10                                                                                                  |
| FW                              | 296.37                                         | maximum 2 $\theta$ , deg                       | 136.4                                                                                                               |
| crystal system                  | monoclinic                                     | reflections collected                          | 8864                                                                                                                |
| space group                     | P2 <sub>1</sub> (#4)                           | independent reflections [ $R(\text{int})$ ]    | 2669 [ $R(\text{int}) = 0.0605$ ]                                                                                   |
| $a$ , Å                         | 8.6683(12)                                     | max. and min. transmission                     | 0.934/0.694                                                                                                         |
| $b$ , Å                         | 8.3860(10)                                     | goodness-of-fit on $F^2$                       | 1.174                                                                                                               |
| $c$ , Å                         | 11.3586(14)                                    | $R_1$ [ $I > 2\sigma(I)$ ]                     | 0.0386                                                                                                              |
| $\beta$ , deg                   | 110.379(8)                                     | $R$ , $wR_2$ (all data)                        | 0.0586, 0.1248                                                                                                      |
| volume, Å <sup>3</sup>          | 774.01(18)                                     | Weighting scheme                               | $R_1 = \Sigma   F_o  -  F_c   / \Sigma  F_o $<br>$wR_2 = [ \Sigma (w(F_o^2 - F_c^2)^2) / \Sigma w(F_o^2)^2 ]^{1/2}$ |
| $Z$                             | 2                                              |                                                |                                                                                                                     |
| $D$ (calcd), Mg m <sup>-3</sup> | 1.272                                          | largest diff. peak and hole, e Å <sup>-3</sup> | 0.23 and -0.24                                                                                                      |
| $\mu$ , cm <sup>-1</sup>        | 6.818                                          | flack parameter                                | -0.06(13)                                                                                                           |
| $F(000)$                        | 316.00                                         |                                                |                                                                                                                     |

### X-Ray Diffraction Analysis of 3s

A single crystal of **3o** was mounted on a glass fiber, and diffraction data were collected in  $\theta$  ranges specified in Table S7 at 123 K on a Rigaku R-Axis Rapid diffractometer with graphite monochromatized Cu-K $\alpha$  radiation ( $\lambda = 1.54187$  Å). The Lorentz polarization absorption correction was applied. The structure was solved by direct methods and refined by the full-matrix least-squares on  $F^2$ . All non-hydrogen atoms were refined with anisotropic displacement parameters. All hydrogen atoms were refined using the riding model. Final refinement details are compiled in Table S7. The supplementary crystallographic data for this paper (CCDC2007774) can also be obtained free of charge via [www.ccdc.cam.ac.uk/conts/retrieving.html](http://www.ccdc.cam.ac.uk/conts/retrieving.html) (or from the Cambridge Crystallographic Data Centre, 12, Union Road, Cambridge CB2 1EZ, UK; fax: +44 1223 336033; or [deposit@ccdc.cam.ac.uk](mailto:deposit@ccdc.cam.ac.uk))

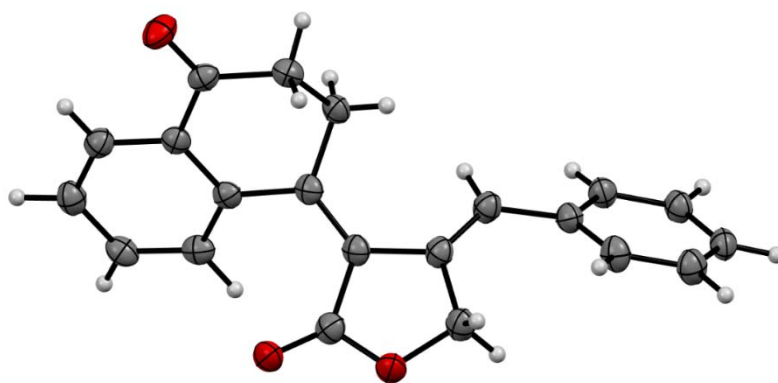

Figure S6 ORTEP plot of **3s**.

Table S7 Selected crystallographic data and collection parameters for **3s**.

|                                 |                                                |                                                |                                                                                                                     |
|---------------------------------|------------------------------------------------|------------------------------------------------|---------------------------------------------------------------------------------------------------------------------|
| formula                         | C <sub>21</sub> H <sub>16</sub> O <sub>3</sub> | crystal size, mm                               | 0.20 x 0.20 x 0.10                                                                                                  |
| FW                              | 316.36                                         | maximum 2 $\theta$ , deg                       | 136.4                                                                                                               |
| crystal system                  | monoclinic                                     | reflections collected                          | 8943                                                                                                                |
| space group                     | P2 <sub>1</sub> (#4)                           | independent reflections [ $R(\text{int})$ ]    | 2701 [ $R(\text{int}) = 0.0352$ ]                                                                                   |
| $a$ , Å                         | 9.6092(3)                                      | max. and min. transmission                     | 0.929/0.734                                                                                                         |
| $b$ , Å                         | 8.1201(3)                                      | goodness-of-fit on $F^2$                       | 1.076                                                                                                               |
| $c$ , Å                         | 10.9799(4)                                     | $R_1$ [ $I > 2\sigma(I)$ ]                     | 0.0317                                                                                                              |
| $\beta$ , deg                   | 116.4260(18)                                   | $R$ , $wR_2$ (all data)                        | 0.0333, 0.0822                                                                                                      |
| volume, Å <sup>3</sup>          | 767.22(4)                                      | Weighting scheme                               | $R_1 = \Sigma   F_o  -  F_c   / \Sigma  F_o $<br>$wR_2 = [ \Sigma (w(F_o^2 - F_c^2)^2) / \Sigma w(F_o^2)^2 ]^{1/2}$ |
| $Z$                             | 2                                              | largest diff. peak and hole, e Å <sup>-3</sup> | 0.19 and -0.21                                                                                                      |
| $D$ (calcd), Mg m <sup>-3</sup> | 1.369                                          | flack parameter                                | 0.05(8)                                                                                                             |
| $\mu$ , cm <sup>-1</sup>        | 7.340                                          |                                                |                                                                                                                     |
| $F(000)$                        | 332.00                                         |                                                |                                                                                                                     |

### X-Ray Diffraction Analysis of 7

A single crystal of **7** was mounted on a glass fiber, and diffraction data were collected in  $\theta$  ranges specified in Table S8 at 123 K on a Rigaku R-Axis Rapid diffractometer with graphite monochromatized Cu-K $\alpha$  radiation ( $\lambda = 1.54187$  Å). The Lorentz polarization absorption correction was applied. The structure was solved by direct methods and refined by the full-matrix least-squares on  $F^2$ . All non-hydrogen atoms were refined with anisotropic displacement parameters. All hydrogen atoms were refined using the riding model. Final refinement details are compiled in Table S8. The supplementary crystallographic data for this paper (CCDC2007775) can also be obtained free of charge via [www.ccdc.cam.ac.uk/conts/retrieving.html](http://www.ccdc.cam.ac.uk/conts/retrieving.html) (or from the Cambridge Crystallographic Data Centre, 12, Union Road, Cambridge CB2 1EZ, UK; fax: +44 1223 336033; or [deposit@ccdc.cam.ac.uk](mailto:deposit@ccdc.cam.ac.uk))

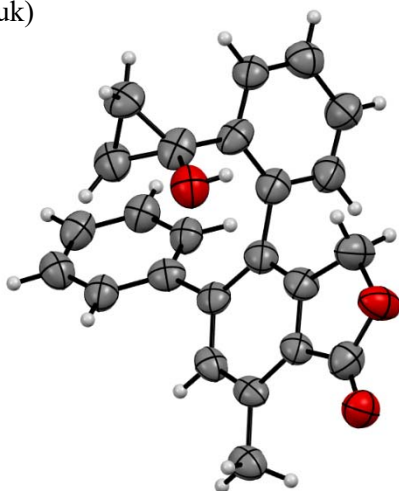

Figure S7 ORTEP plot of **7**.

Table S8 Selected crystallographic data and collection parameters for **7**.

|                                 |                                                |                                                |                                                                                                                     |
|---------------------------------|------------------------------------------------|------------------------------------------------|---------------------------------------------------------------------------------------------------------------------|
| formula                         | C <sub>24</sub> H <sub>20</sub> O <sub>3</sub> | crystal size, mm                               | 0.70 x 0.10 x 0.10                                                                                                  |
| FW                              | 356.42                                         | maximum 2 $\theta$ , deg                       | 136.5                                                                                                               |
| crystal system                  | monoclinic                                     | reflections collected                          | 19341                                                                                                               |
| space group                     | P2 <sub>1</sub> /n (#14)                       | independent reflections [ $R(\text{int})$ ]    | 3332 [ $R(\text{int}) = 0.1118$ ]                                                                                   |
| $a$ , Å                         | 13.0170(6)                                     | max. and min. transmission                     | 0.934/0.433                                                                                                         |
| $b$ , Å                         | 10.8103(5)                                     | goodness-of-fit on $F^2$                       | 0.881                                                                                                               |
| $c$ , Å                         | 13.8173(6)                                     | $R_1$ [ $I > 2\sigma(I)$ ]                     | 0.1038                                                                                                              |
| $\beta$ , deg                   | 110.376(2)                                     | $R$ , $wR_2$ (all data)                        | 0.1887, 0.3372                                                                                                      |
| volume, Å <sup>3</sup>          | 1822.68(15)                                    | Weighting scheme                               | $R_1 = \Sigma   F_o  -  F_c   / \Sigma  F_o $<br>$wR_2 = [ \Sigma (w(F_o^2 - F_c^2)^2) / \Sigma w(F_o^2)^2 ]^{1/2}$ |
| $Z$                             | 4                                              | largest diff. peak and hole, e Å <sup>-3</sup> | 0.33 and -0.44                                                                                                      |
| $D$ (calcd), Mg m <sup>-3</sup> | 1.299                                          |                                                |                                                                                                                     |
| $\mu$ , cm <sup>-1</sup>        | 6.777                                          |                                                |                                                                                                                     |
| $F(000)$                        | 752.00                                         |                                                |                                                                                                                     |

## 10. DFT Calculations

The Gaussian 16 program package was used for all calculations.<sup>21</sup> The geometries of the stationary points and transition states were fully optimized using the Becke's three-parameter hybrid density functional method (B3LYP),<sup>22</sup> with a  $[3s3p2d]$  contracted-valence basis set with the relativistic effective core potential of Hay and Wadt (LanL2DZ)<sup>23</sup> for Rh, and the 6-31G(d)<sup>24</sup> basis sets for other elements. The vibrational frequencies and the thermal correction to Gibbs free energy (TCGFE) including the zero-point energy were calculated at the same level of theory. The obtained structures were characterized by the number of imaginary frequencies (one or zero for the transition and ground states, respectively). The connectivity of each step was also confirmed using intrinsic reaction coordinate (IRC)<sup>25</sup> calculation from the transition states, followed by optimization of the resultant geometries. Single-point energies for geometries obtained using the above method were calculated at the same level of theory using a  $[6s5p3d]$  contracted-valence basis set with the Stuttgart-Dresden-Bonn energy-consistent pseudopotential (SDD)<sup>26</sup> for Rh, and the 6-311++G(d,p) basis sets<sup>27</sup> for other elements. The D3 version of Grimme's dispersion with Becke-Johnson damping<sup>28</sup> was used for empirical dispersion correction. To examine the solvent effect, the above single-point energy calculations were performed using the SMD model<sup>29</sup> with CH<sub>2</sub>Cl<sub>2</sub> as the solvent. CYLview (Ver. 1.0b)<sup>30</sup> was used for the visualization of the optimized structures.

**Table S9.** Summary of theoretical calculations.

| Model                  | TCGFE/au | SMD Energy/au | IF/cm <sup>-1</sup> |
|------------------------|----------|---------------|---------------------|
| <b>A</b>               | 0.834094 | -3525.768839  |                     |
| <b>TS<sub>AB</sub></b> | 0.839935 | -3525.770357  | 196.3824i           |
| <b>B</b>               | 0.842284 | -3525.820307  |                     |
| <b>TS<sub>BC</sub></b> | 0.843373 | -3525.804259  | 139.3597i           |
| <b>C</b>               | 0.846548 | -3525.837278  |                     |
| <b>TS<sub>CD</sub></b> | 0.845812 | -3525.804187  | 196.3342i           |
| <b>D</b>               | 0.848022 | -3525.838747  |                     |
| <b>TS<sub>DE</sub></b> | 0.847489 | -3525.812232  | 414.6393i           |
| <b>E</b>               | 0.841963 | -3525.853145  |                     |
| <b>F</b>               | 0.842689 | -3525.864414  |                     |
| <b>G</b>               | 0.845008 | -3525.874465  |                     |
| <b>H</b>               | 0.841103 | -3525.893471  |                     |
| <b>TS<sub>HI</sub></b> | 0.839893 | -3525.880753  | 713.8393i           |
| <b>I</b>               | 0.846142 | -3525.918818  |                     |
| <b>J</b>               | 0.867360 | -3602.346015  |                     |
| <b>TS<sub>JK</sub></b> | 0.863551 | -3602.300901  | 1196.9188i          |
| <b>K</b>               | 0.866285 | -3602.388430  |                     |

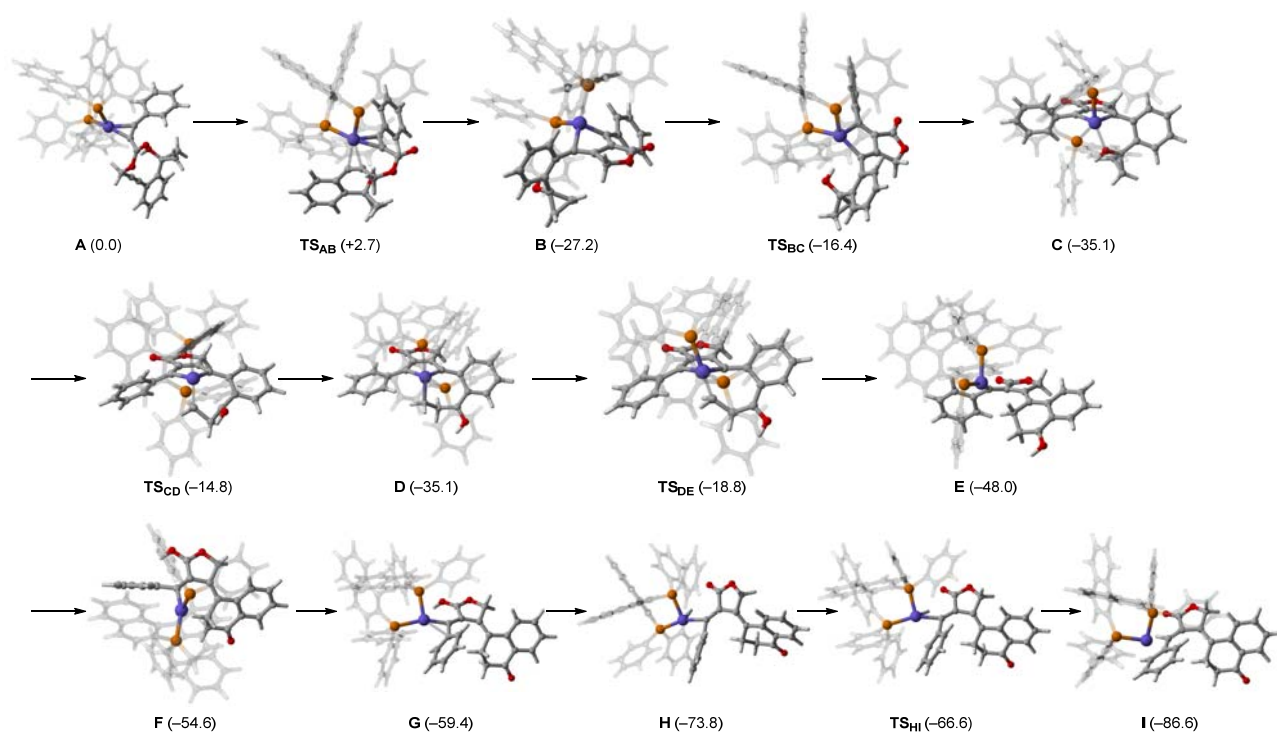

**Figure S8.** The overall process of the Rh-BINAP complex-catalyzed cycloisomerization reaction of **1a** with CYLview drawings.

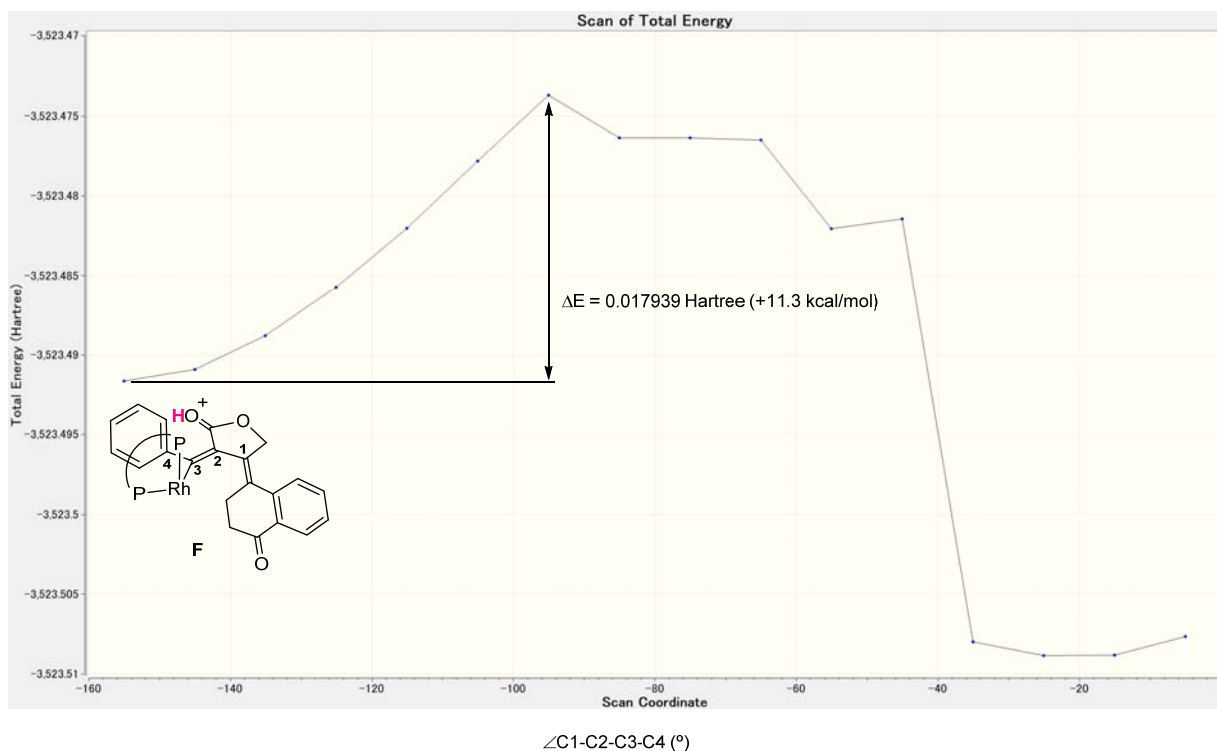

**Figure S9.** Energy-scan profile for the bond-rotation step (the *E/Z* isomerization process; **F**→**G**).

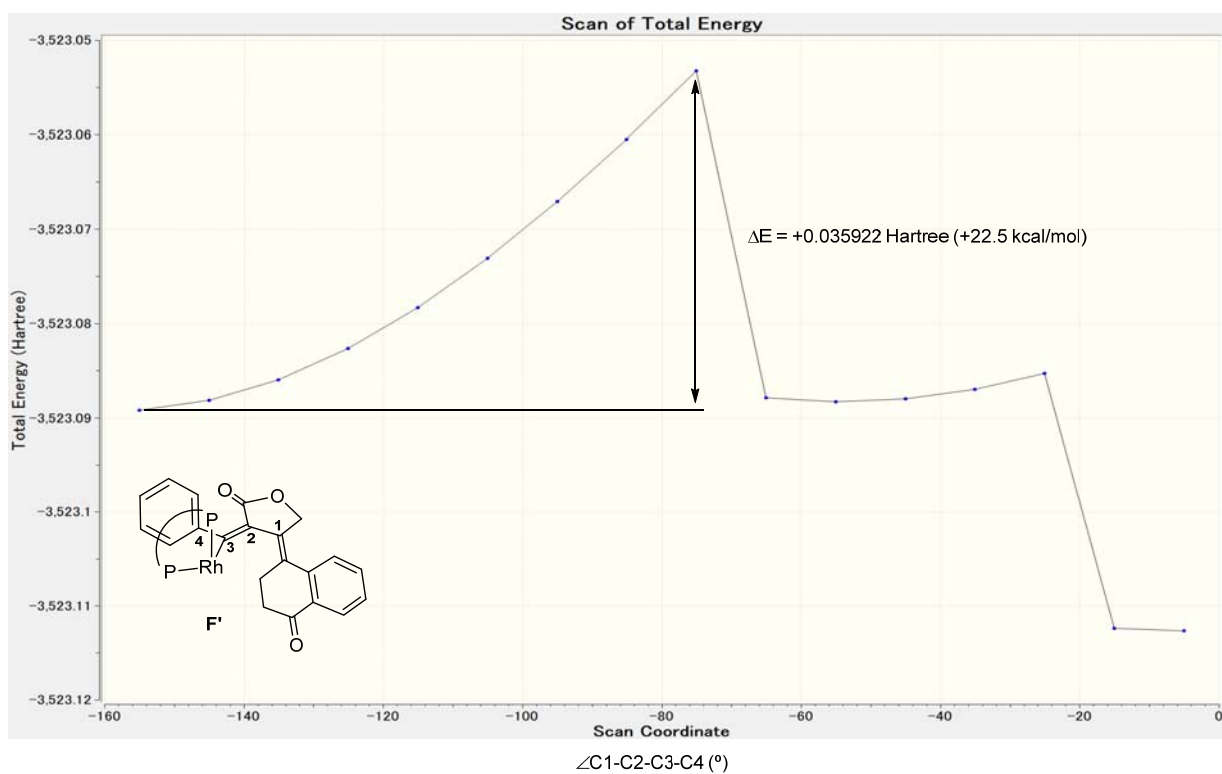

**Figure S10.** Energy-scan profile for the bond-rotation step without protonation.

We conducted a DFT calculation for the protodemetalation of complex **F** without *E/Z* isomerization. However, this process seemed to be difficult due to the long distance between the rhodium center and proton on the lactone carbonyl group. Therefore, we conducted the calculation with a water molecule as a proton-transfer agent (Figure S11). The result elucidated that the water-assisted protodemetalation (**J**→**K**) proceeds via **TS<sub>JK</sub>** with a barrier of 25.9 kcal/mol, indicating that this process is energetically unfavorable compared to the process (**F**→**I**) shown in Fig 1.

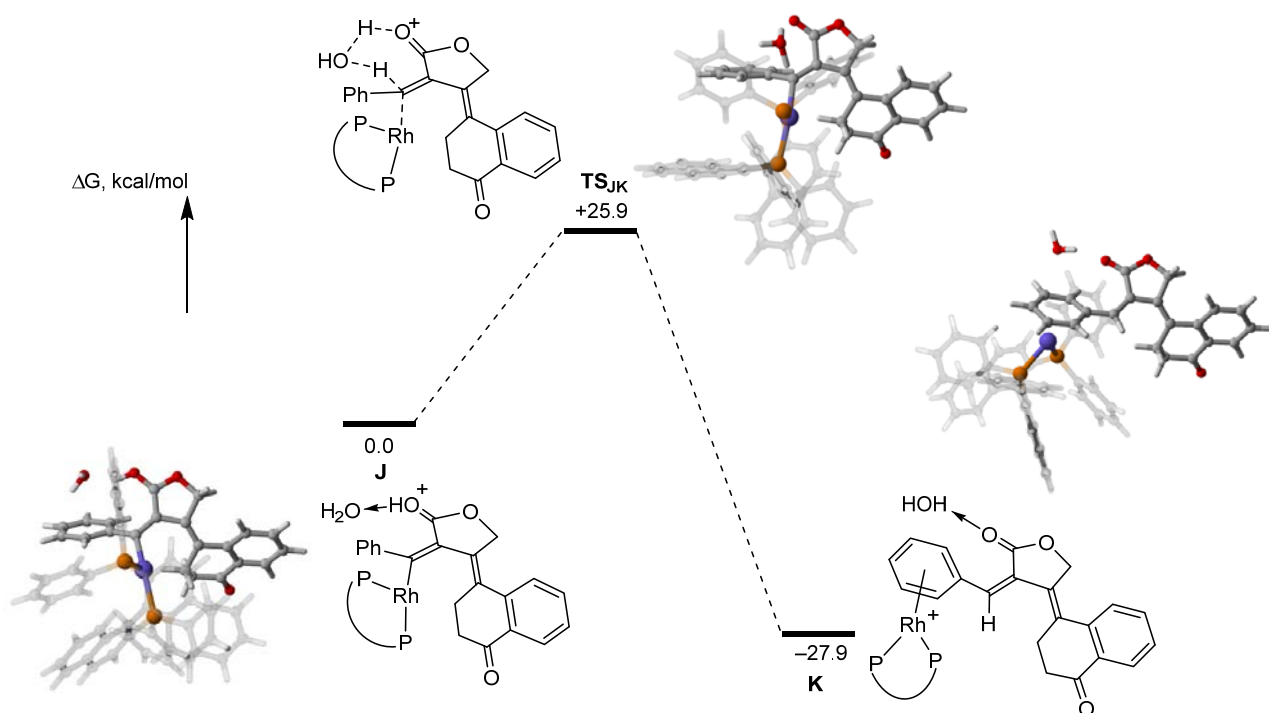

**Figure S11.** Gibbs free energy diagram for water-assisted protodemetalation without *E/Z* isomerization [SMD (CH<sub>2</sub>Cl<sub>2</sub>) B3LYP(GD3BJ)/6-311G++(d,p)-SDD//B3LYP/6-31G(d)-LanL2DZ].



To elucidate the effect of an amide tether moiety in the reaction of **1q**, we conducted energy-scan for the *E/Z*-isomerization of an amide-tethered 1,6-diyne substrate (Figure S12). Interestingly, the result suggests that the bond rotation proceeds via metallacyclopropene intermediate **M**. This intermediate **M** is generated from intermediate **L** with a barrier of 17.3 kcal/mol, which is 6 kcal/mol higher in energy compared to the case of ester-tethered 1,6-diyne substrate (11.3 kcal/mol). This result is consistent with the experimental result. Intermediate **M** successively evolves to **N** with a barrier of 15.0 kcal/mol.

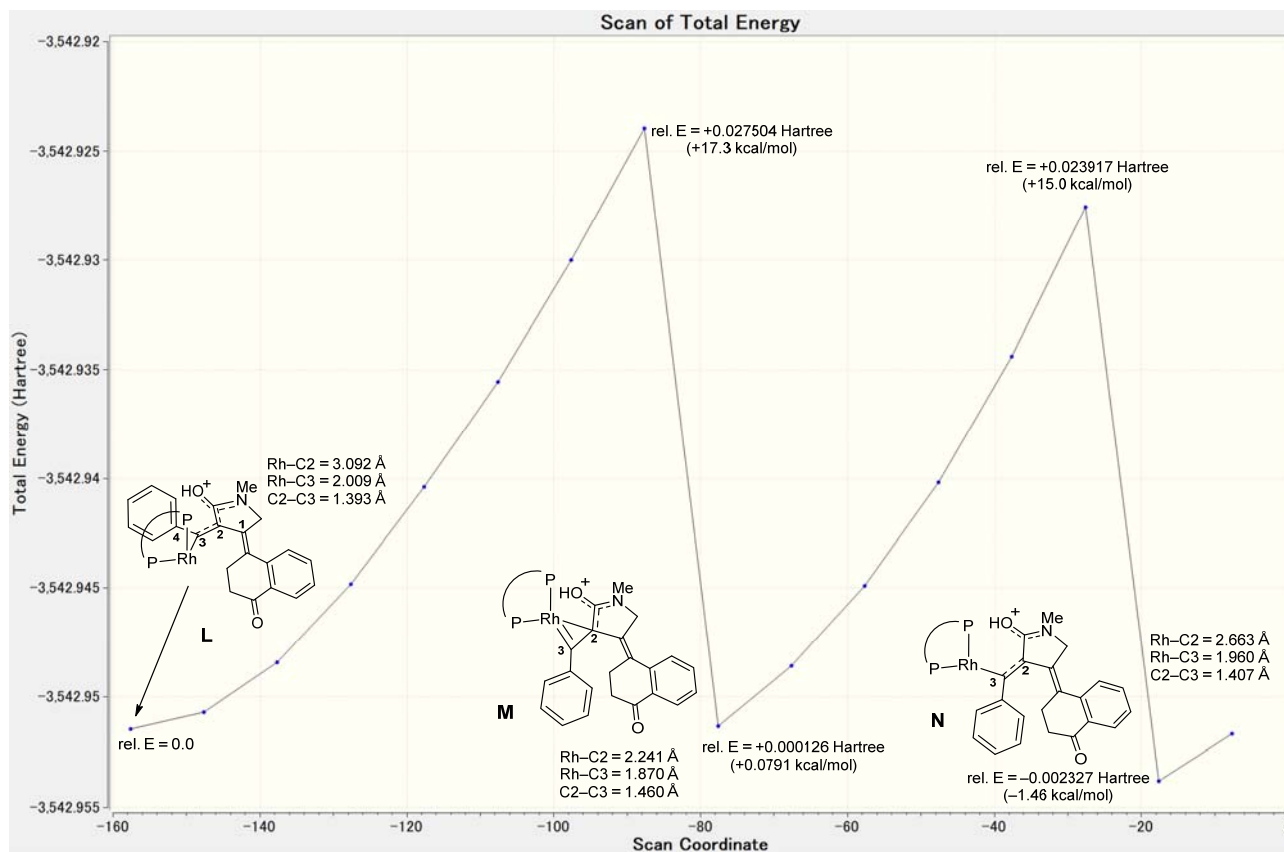

**Figure S12.** Energy-scan profile for the bond-rotation step in the reaction of an amide-tethered 1,6-diyne substrate.

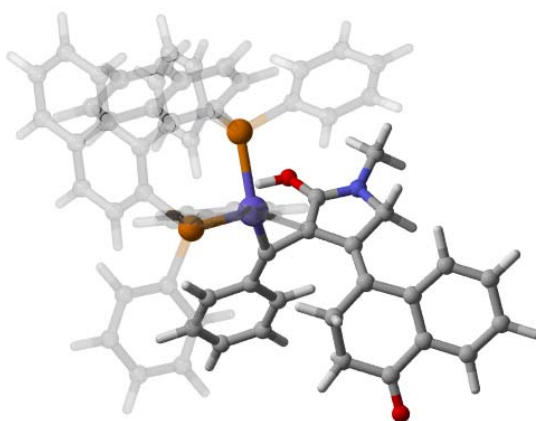

**Figure S13.** Structure of metallacyclopropene intermediate **M**.

## 11. References

- (1) R. Usón, L. A. Oro, J. A. Cabeza, *Inorg. Synth.* **1985**, 23, 126.
- (2) A. Mercier, W. C. Yeo, J. Chou, P. D. Chaudhuri, G. Bernardinelli, E. P. Kündig, *Chem. Commun.* **2009**, 5227.
- (3) D. Yang, Y. Long, J. Zhang, H. Zeng, S. Wang, C. Li, *Organometallics* **2010**, 29, 3477.
- (4) H. Qiu, Y. Inoue, S. Che, *Angew. Chem. Int. Ed.* **2009**, 48, 3069-3072.
- (5) H. S. Oskooie, M. M. Heravi, F. K. Behbahani, *Molecules* **2007**, 12, 1438.
- (6) L. Zheng, B. Zhou, H. Jin, T. Li, Y. Liu, *Org. Lett.* **2018**, 20, 7053.
- (7) P. Cazeau, F. Duboudin, F. Moulines, O. Babot, J. Dunogues, *Tetrahedron* **1987**, 43, 2075.
- (8) Z. Lou, S. Zhang, C. Chen, X. Pang, M. Li, L. Wen, *Adv. Synth. Catal.* **2014**, 356, 153.
- (9) Q. Feng, K. Yanga, Q. Song, *Chem. Commun.* **2015**, 51, 15394.
- (10) L. Yang, H. Li, Y. Du, K. Cheng, C. Qi, *Adv. Synth. Catal.* **2019**, 361, 5030.
- (11) A. Verma, R. J. Grams, B. P. Rastatter, W. L. Santo, *Tetrahedron*, **2019**, 75, 2113.
- (12) S. Gupta, Y. Lin, Y. Xia, D. J. Winka, D. Lee, *Chem. Sci.* **2019**, 10, 2212.
- (13) W. A. Chalifoux, M. J. Ferguson, R. McDonald, F. Melin, L. Echegoven, R. R. Tykwinski, *J. Phys. Org. Chem.* **2012**, 25, 69.
- (14) N. Ando, A. Fukazawa, T. Kushida, Y. Shiota, S. Itoyama, K. Yoshizawa, Y. Matsui, Y. Kuramoto, H. Ikeda, S. Yamaguchi, *Angew. Chem. Int. Ed.* **2017**, 56, 12210.
- (15) P. Dallemagne, L. P. Khanh, A. Alsaïdi, O. Renault, I. Varlet, V. Collot, R. Bureau, S. Rault, *Bioorg. Med. Chem.* **2002**, 10, 2185.
- (16) X. Hu, Y. Dong, G. Liu, *Mol. Divers.* **2015**, 19, 695.
- (17) Z. Wu, D. Ma, B. Zhou, X. Ji, X. Ma, X. Wang, Y. Zhang, *Angew. Chem. Int. Ed.* **2017**, 56, 12288.
- (18) J. Cao, K. Sun, S. Dong, T. Lu, Y. Dong, D. Du, *Org. Lett.* **2017**, 19, 6724.
- (19) J. C. Lorenz, J. Long, Z. Yang, S. Xue, Y. Xie, Y. Shi, *J. Org. Chem.* **2004**, 69, 327.
- (20) C. -B. Bo, Q. Bu, X. Li, G. Ma, D. Wei, C. Guo, B. Dai, N. Liu, *J. Org. Chem.* **2020**, 85, 4324.
- (21) Gaussian 16, Revision B.01, M. J. Frisch, G. W. Trucks, H. B. Schlegel, G. E. Scuseria, M. A. Robb, J. R. Cheeseman, G. Scalmani, V. Barone, G. A. Petersson, H. Nakatsuji, X. Li, M. Caricato, A. V. Marenich, J. Bloino, B. G. Janesko, R. Gomperts, B. Mennucci, H. P. Hratchian, J. V. Ortiz, A. F. Izmaylov, J. L. Sonnenberg, D. Williams-Young, F. Ding, F. Lipparini, F. Egidi, J. Goings, B. Peng, A. Petrone, T. Henderson, D. Ranasinghe, V. G. Zakrzewski, J. Gao, N. Rega, G. Zheng, W. Liang, M. Hada, M. Ehara, K. Toyota, R. Fukuda, J. Hasegawa, M. Ishida, T. Nakajima, Y. Honda, O. Kitao, H. Nakai, T. Vreven, K. Throssell, J. A. Montgomery, Jr., J. E. Peralta, F. Ogliaro, M. J. Bearpark, J. J. Heyd, E. N. Brothers, K. N. Kudin, V. N. Staroverov, T. A. Keith, R. Kobayashi, J. Normand, K. Raghavachari, A. P. Rendell, J. C. Burant, S. S. Iyengar, J. Tomasi, M. Cossi, J. M. Millam, M. Klene, C. Adamo, R. Cammi, J. W. Ochterski, R. L. Martin, K. Morokuma, O. Farkas, J. B. Foresman, and D. J. Fox, Gaussian, Inc., Wallingford CT, 2016.
- (22) (a) W. Kohn, A. D. Becke, R. G. Parr, *J. Phys. Chem.* **1996**, 100, 12974-12980. (b) P. J. Stephen, F. J. Devlin, C. F. Chabalowski, M. Frisch, *J. Phys. Chem.* **1994**, 98, 11623-11627. (c) A. D. Becke, *J. Chem. Phys.* **1993**, 98, 5648-5652. (d) C. Lee, W. Yang, R. G. Parr, *Phys. Rev. B* **1988**, 37, 785-789.
- (23) (a) P. J. Hay, W. R. Wadt, *J. Chem. Phys.* **1985**, 82, 299-310.
- (24) (a) W. J. Hehre, R. Ditchfield, J. A. Pople, *J. Chem. Phys.* **1972**, 56, 2257-2261. (b) P. C. Hariharan, J. A. Pople, *Theor. Chim. Acta* **1973**, 28, 213-222. (c) M. M. Fracal, W. J. Pietro, W. J. Hehre, J. S. Binkley, M. S. Gordon, D. J. DeFrees, J. A. Pople, *J. Chem. Phys.* **1982**, 77, 3654-3665.
- (25) (a) K. Fukui, *Acc. Chem. Res.* **1981**, 14, 363-368. (b) C. Gonzalez, H. B. Schlegel, *J. Chem. Phys.* **1989**, 90, 2154-2161. (c) C. Gonzalez, H. B. Schlegel, *J. Phys. Chem.* **1990**, 94, 5523-5527.
- (26) D. Andrae, U. Häussermann, M. Dolg, H. Stoll, H. Preuß, *Theor. Chim. Acta* **1990**, 77, 123-141.

- (27) (a) R. Krishnan, J. S. Binkley, R. Seeger, J. A. Pople, *J. Chem. Phys.* **1980**, 72, 650-654. (b) A. D. McLean, G. S. Chandler, *J. Chem. Phys.* **1980**, 72, 5639-5648. (c) M. J. Frisch, J. A. Pople, J. S. Binkley, *J. Chem. Phys.* **1984**, 80, 3265-3269. (d) T. Clark, J. Chandrasekhar, G. W. Spitznagel, P. v. R. Schleyer, *J. Comp. Chem.* **1983**, 4, 294-301.
- (28) S. Grimme, S. Ehrlich, L. Goerigk, *J. Comp. Chem.* **2011**, 32, 1456-1465.
- (29) V. Marenich, C. J. Cramer, D. G. Truhlar, *J. Phys. Chem. B* **2009**, 113, 6378-6396.
- (30) CYLview, 1.0b; Legault, C. Y., Université de Sherbrooke, 2009 (<http://www.cylview.org>).

## 12. NMR Spectra

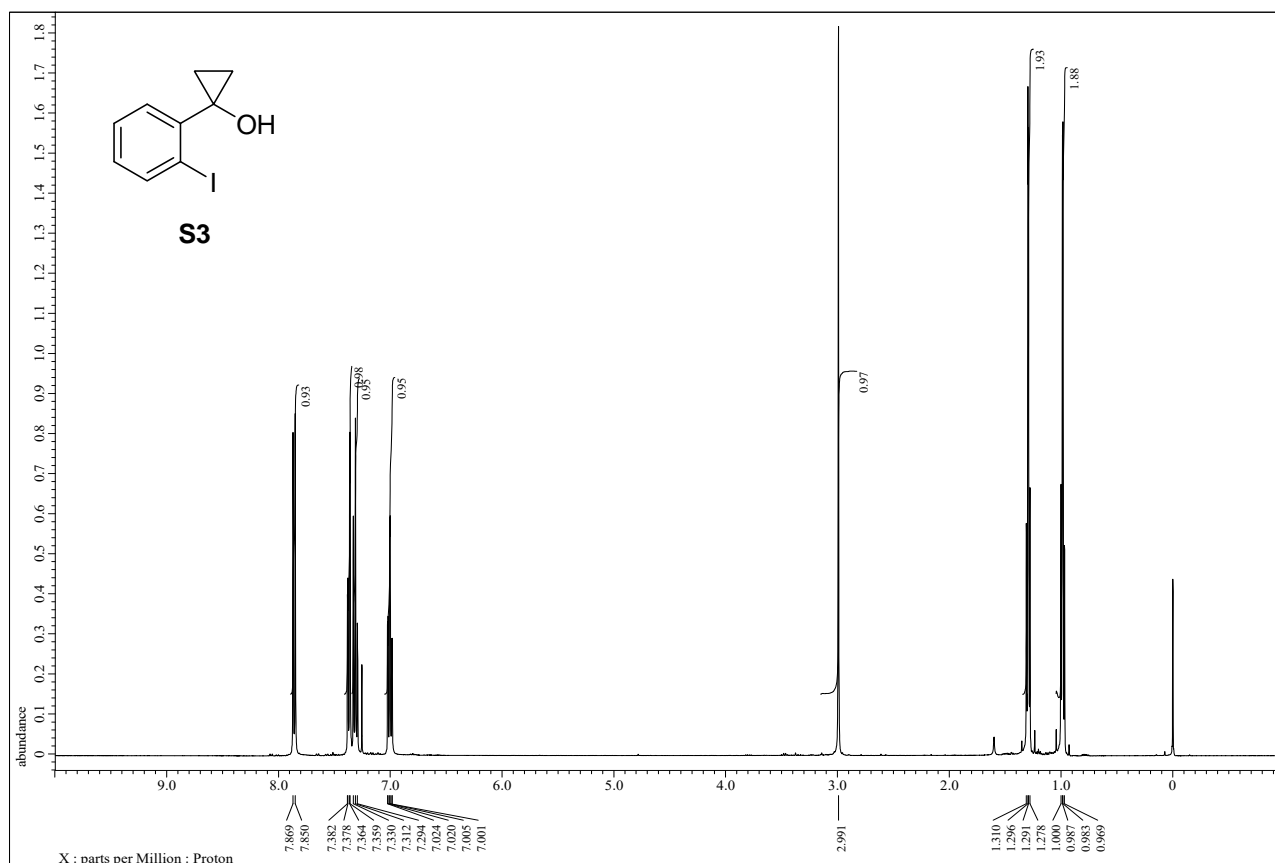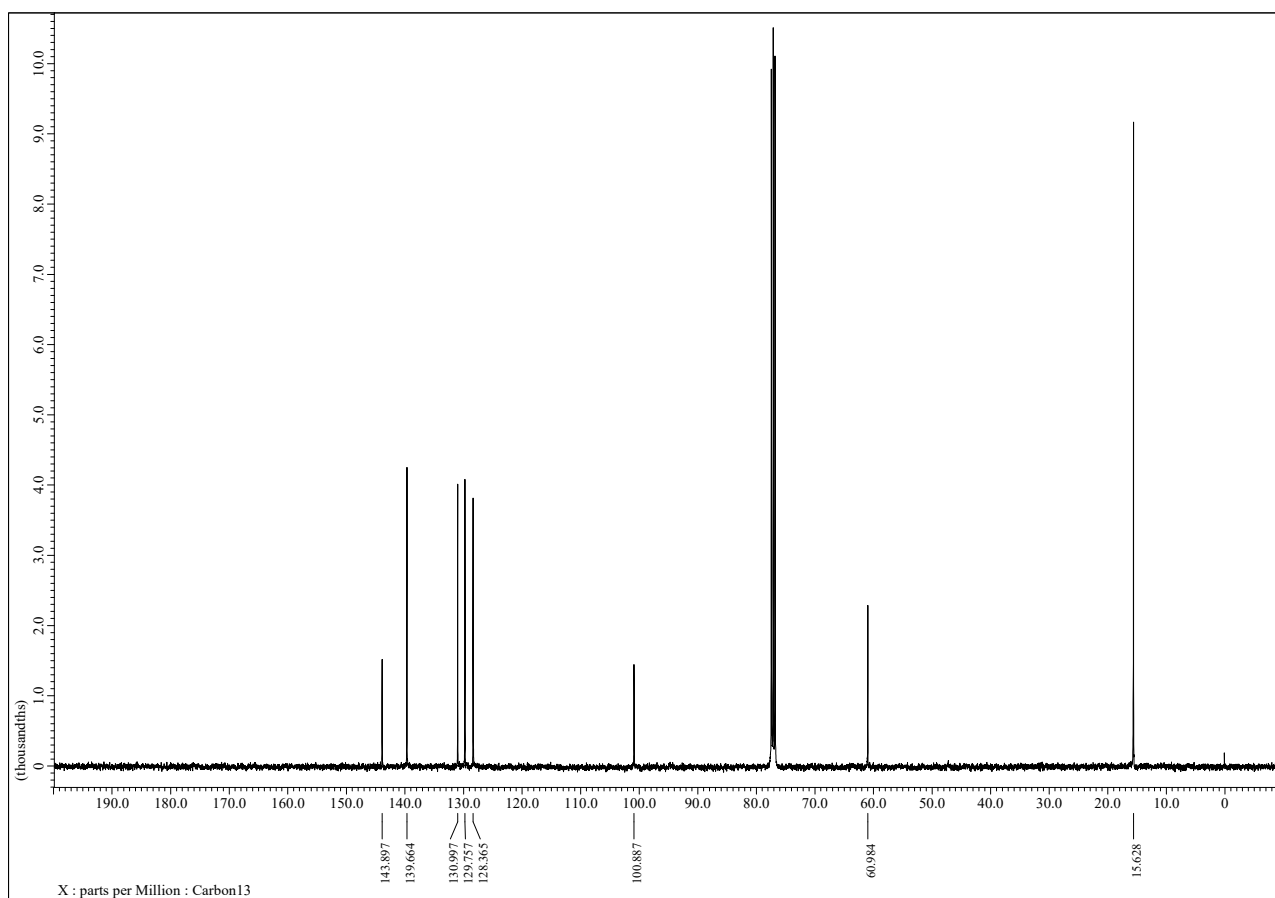

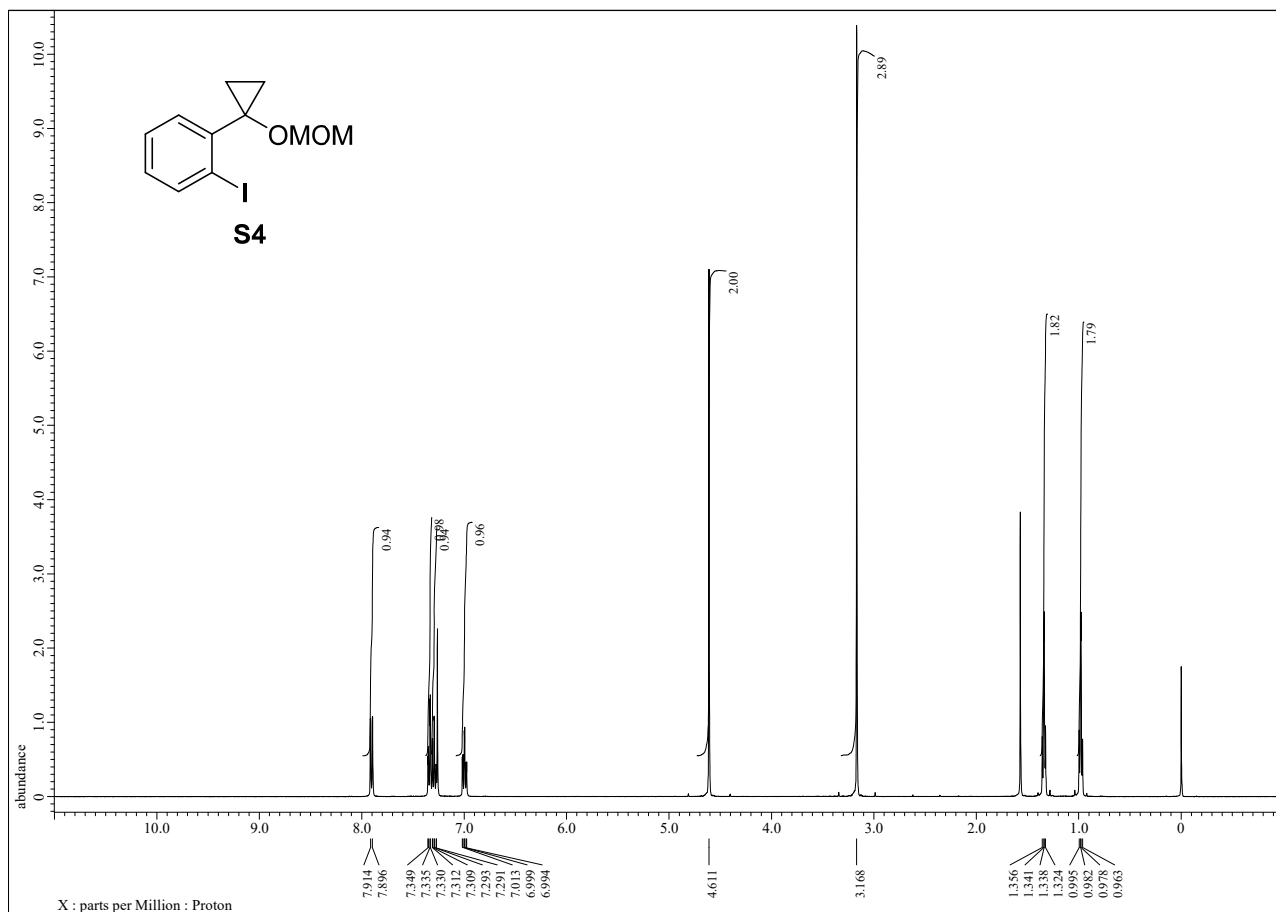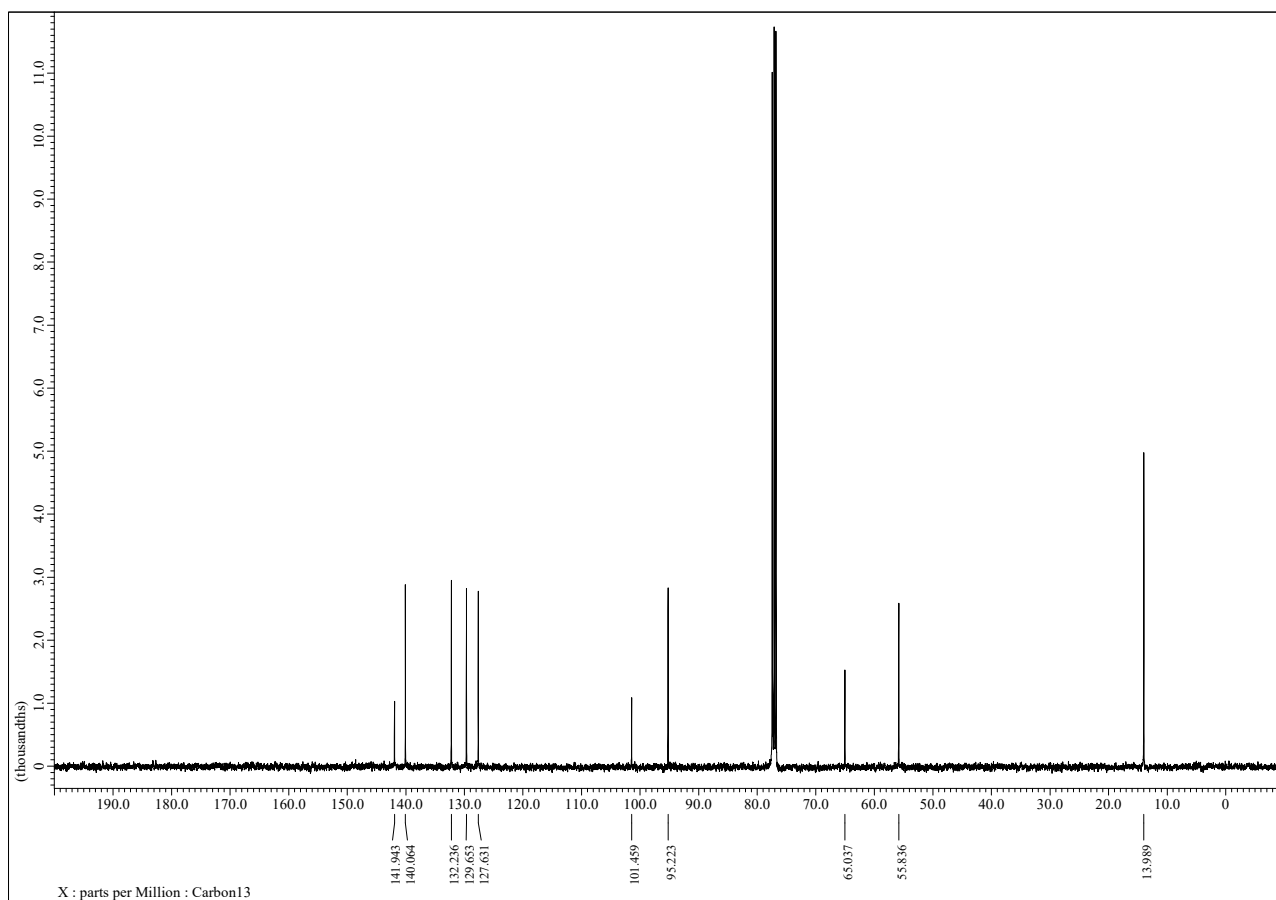

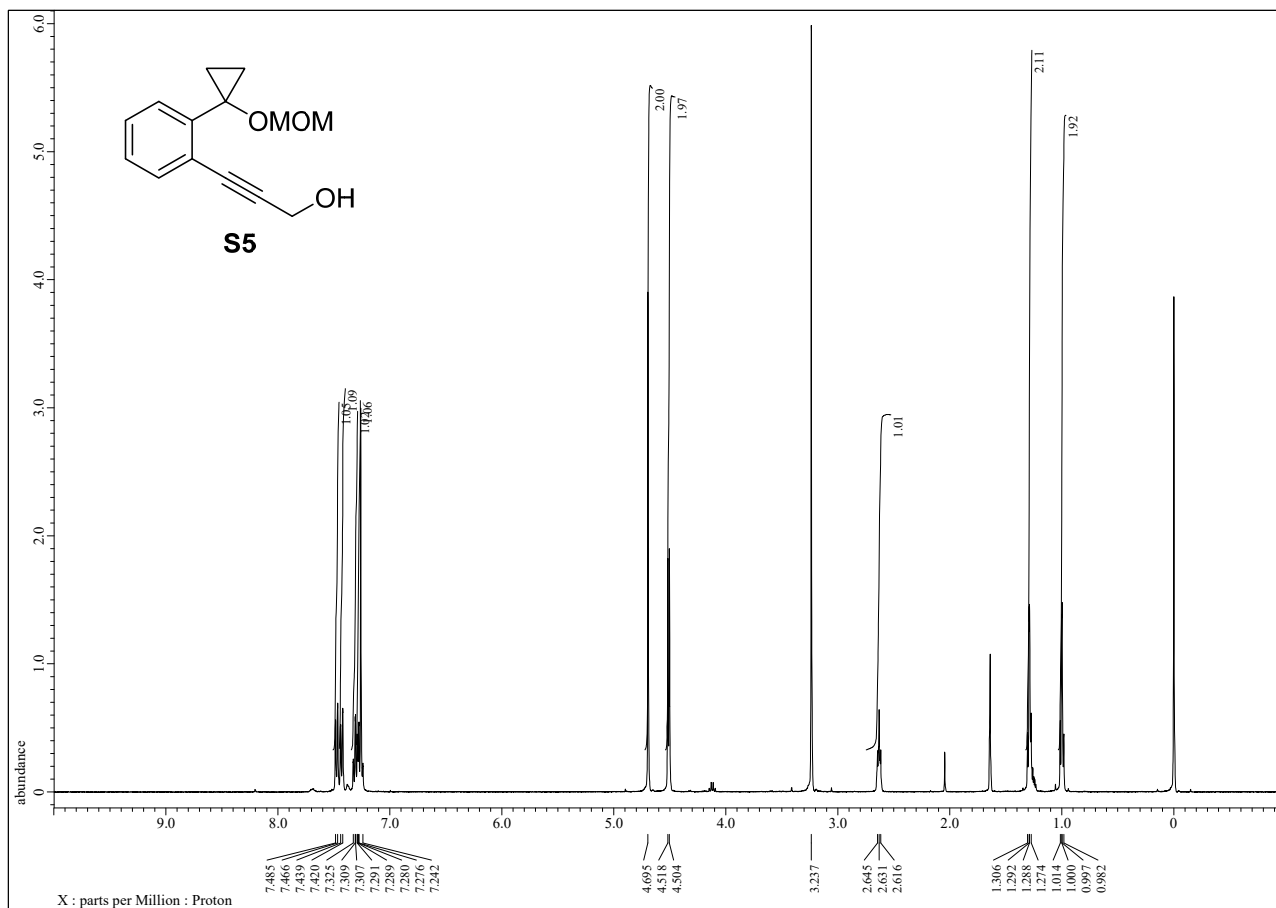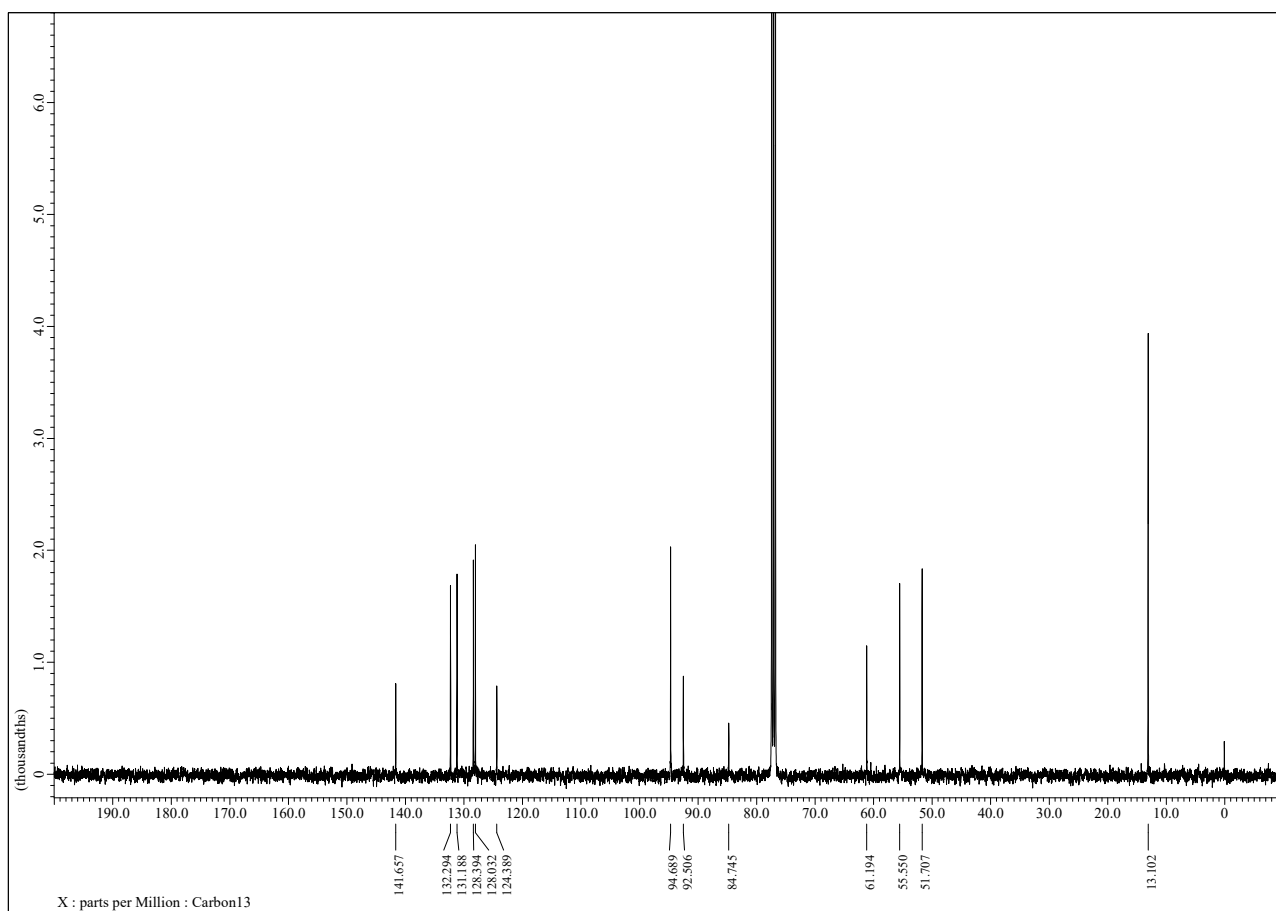

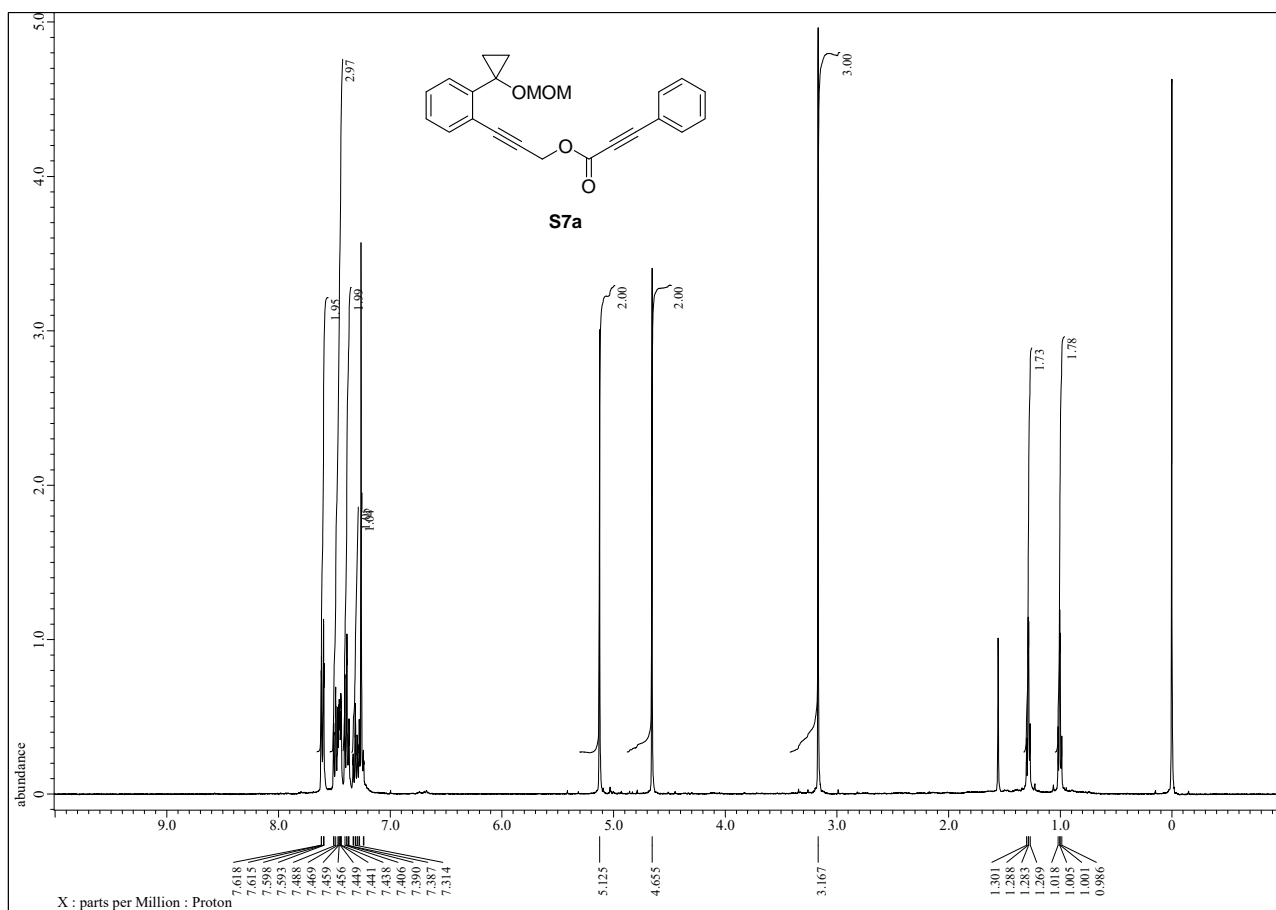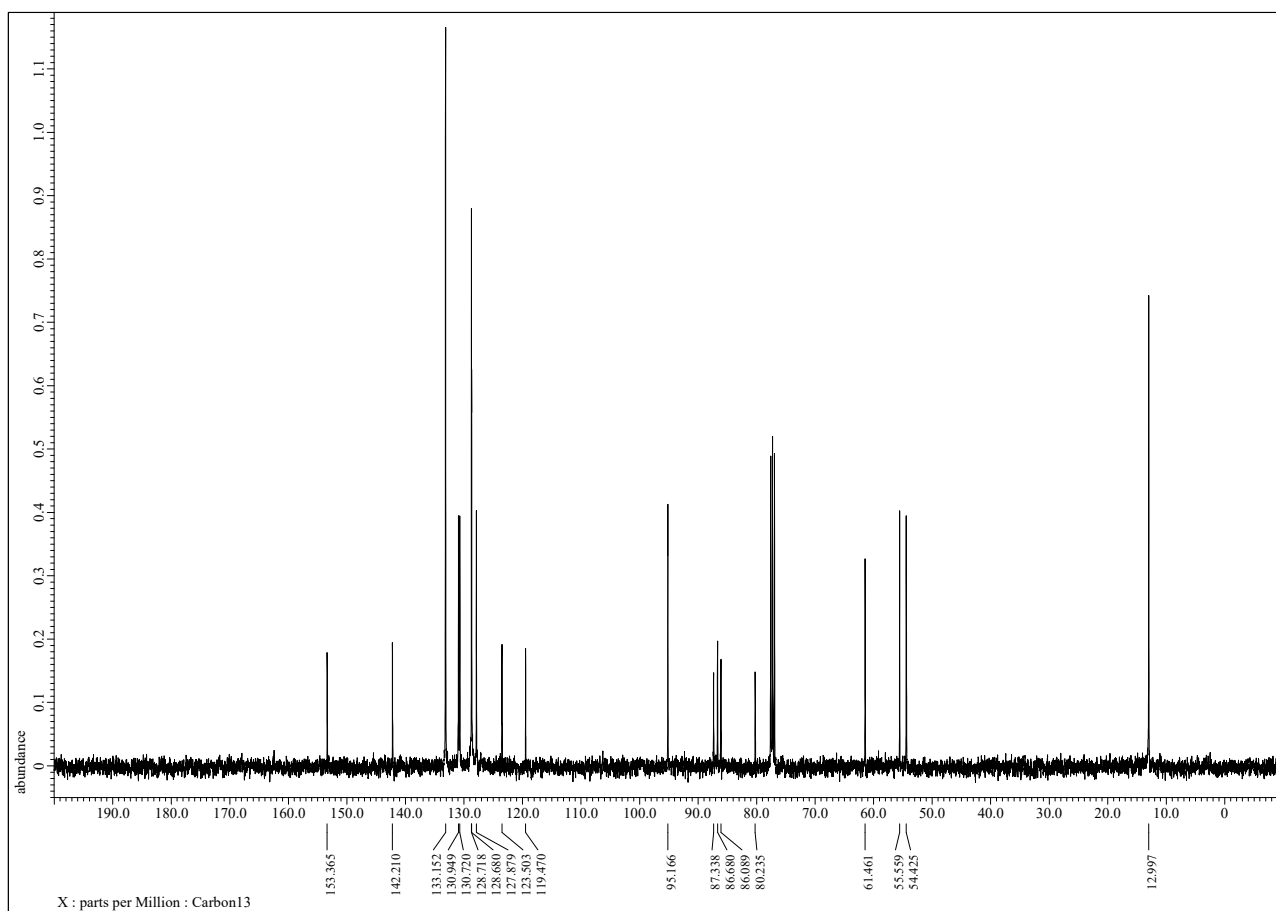

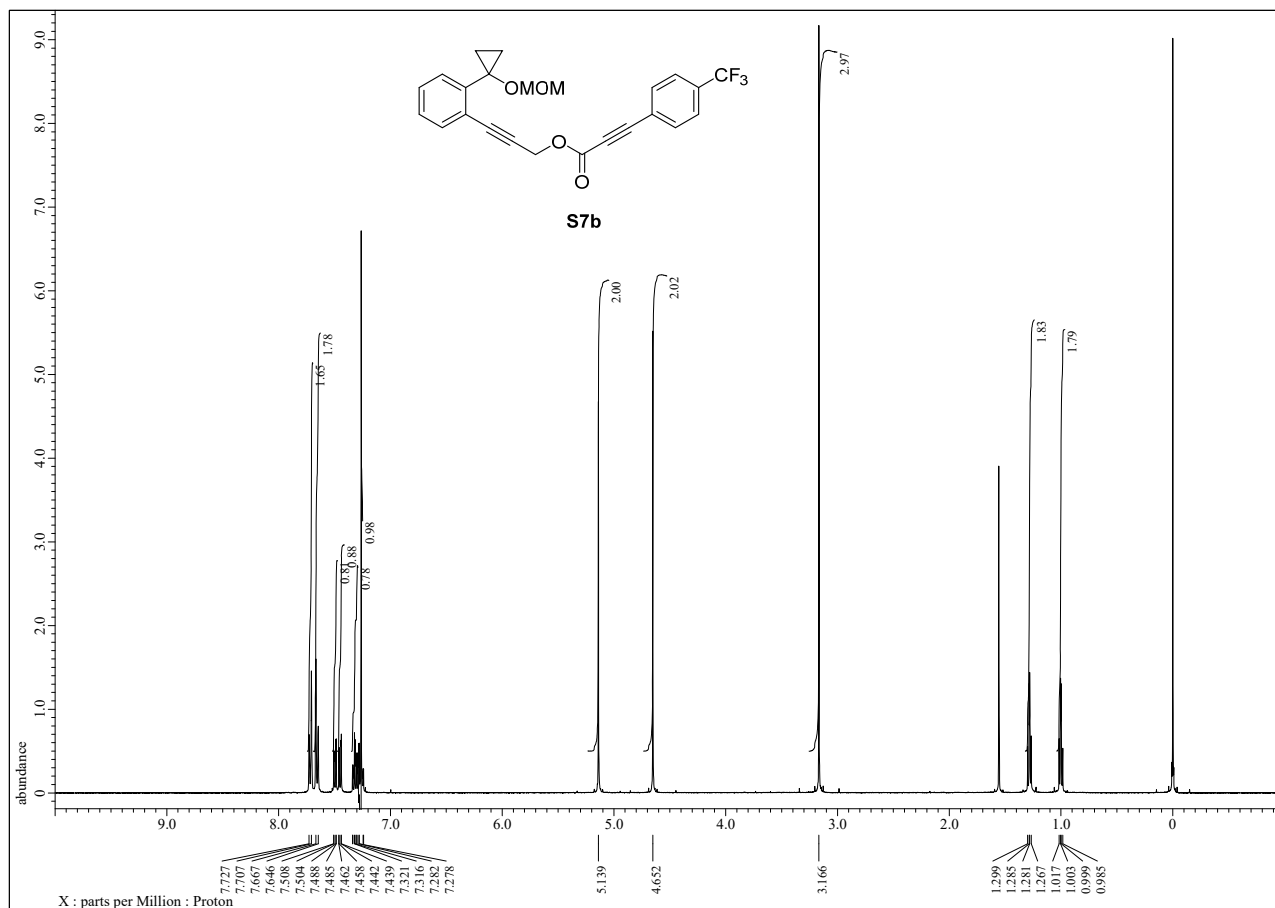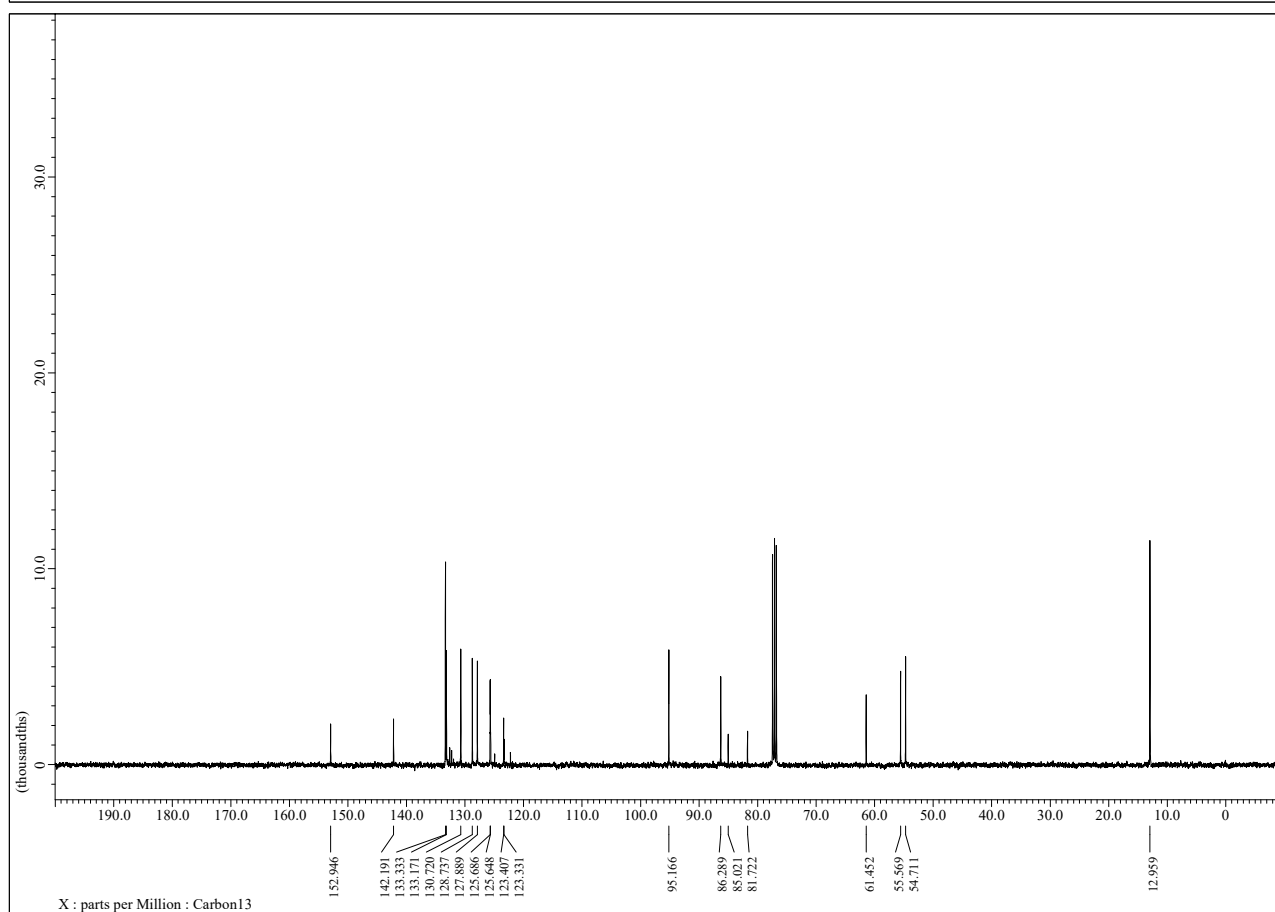



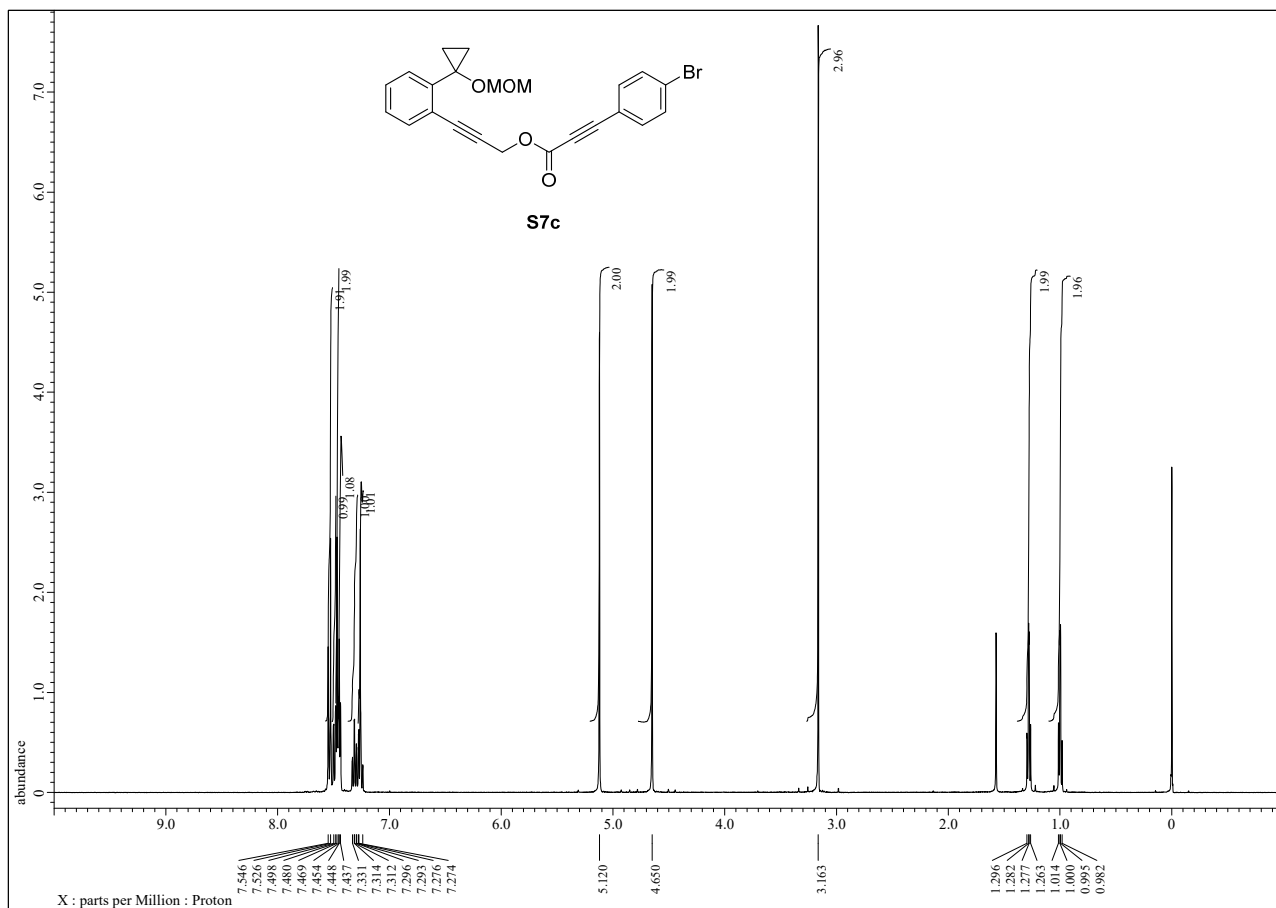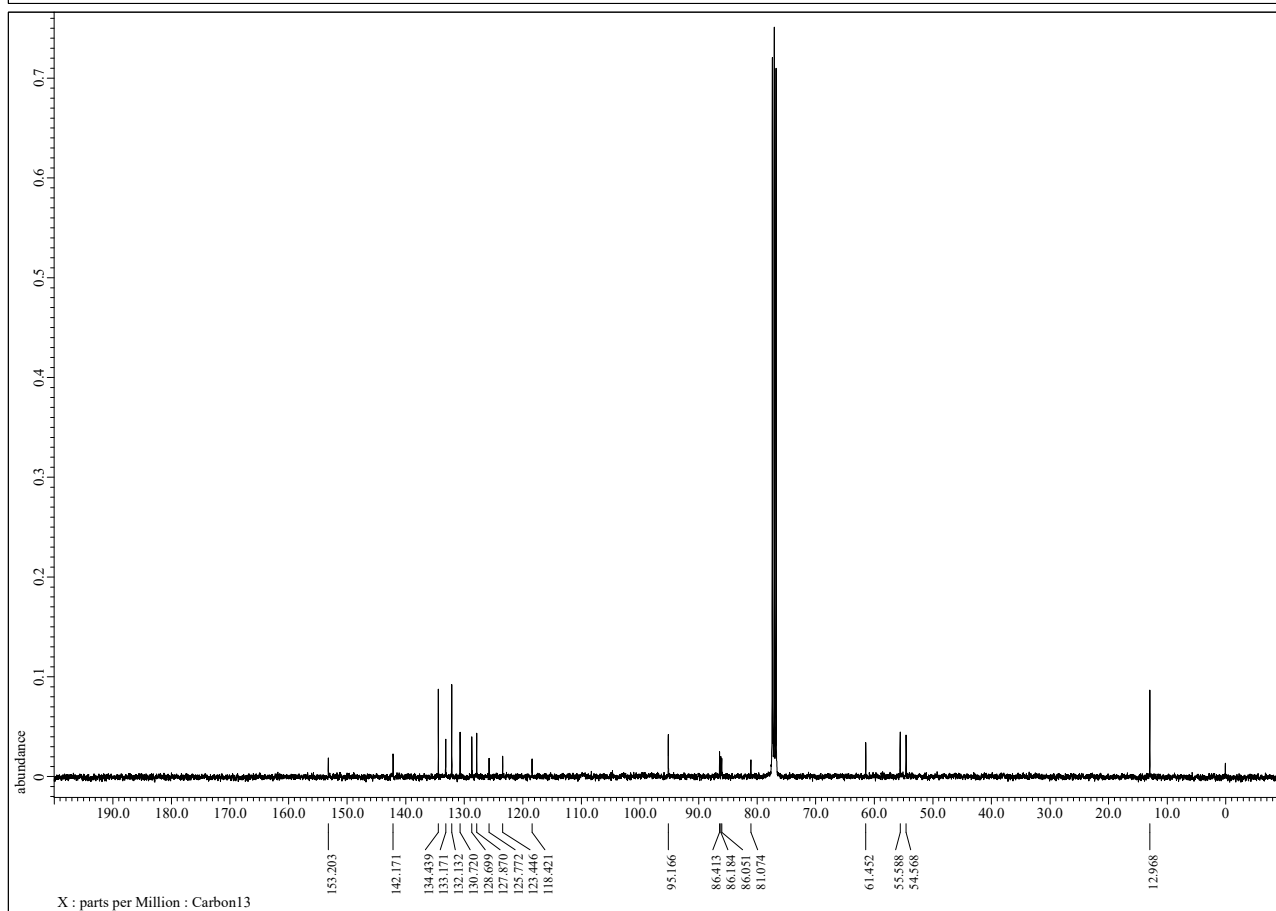

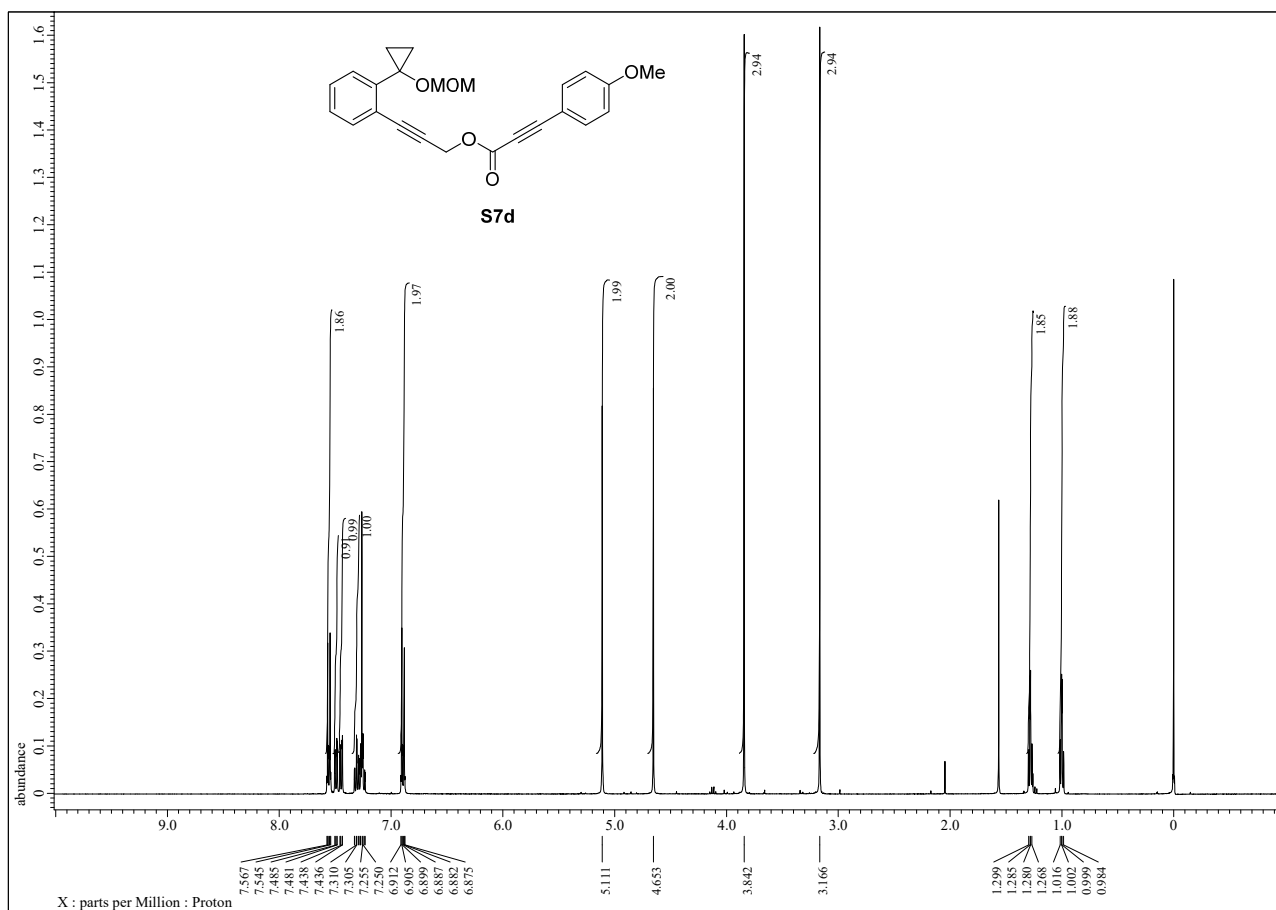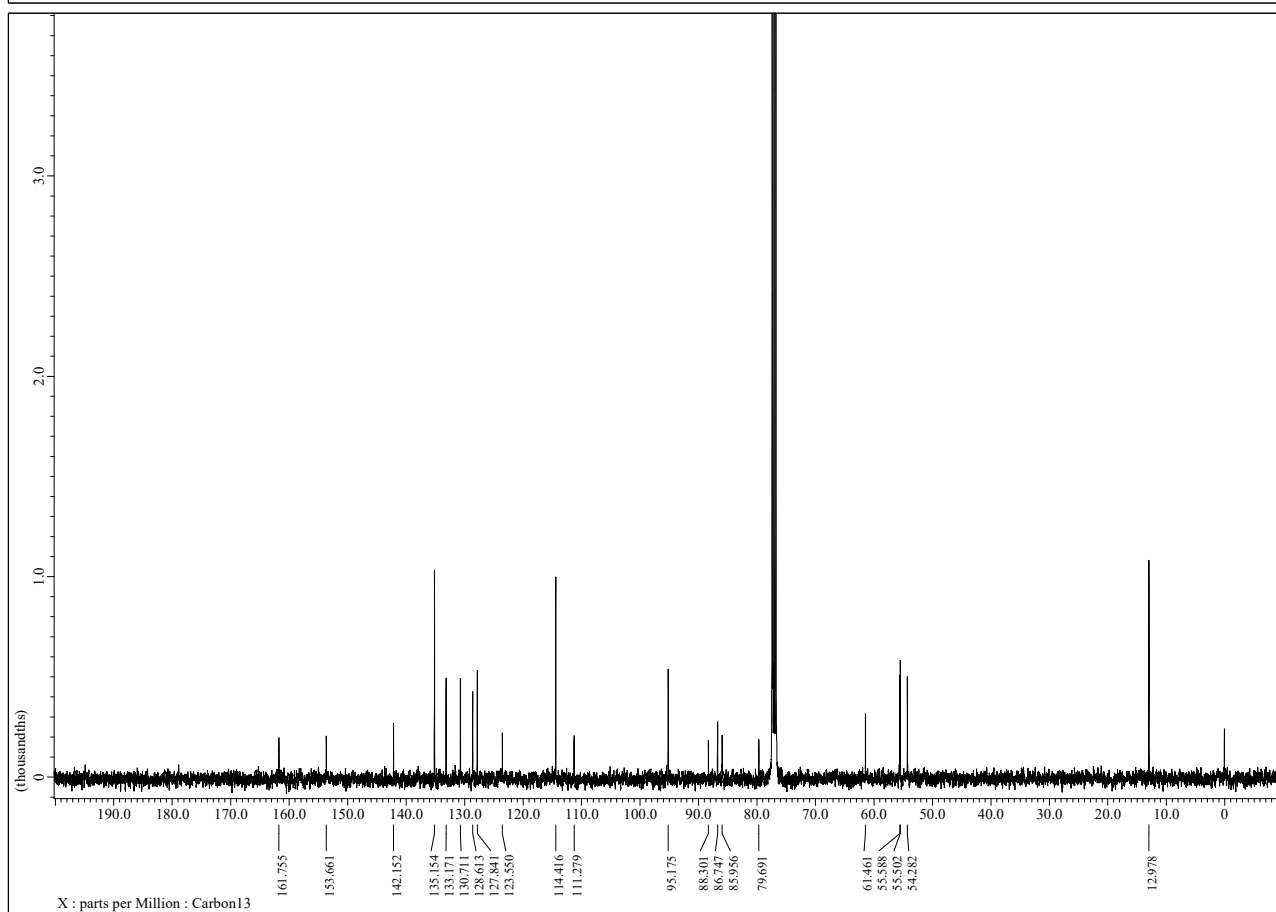

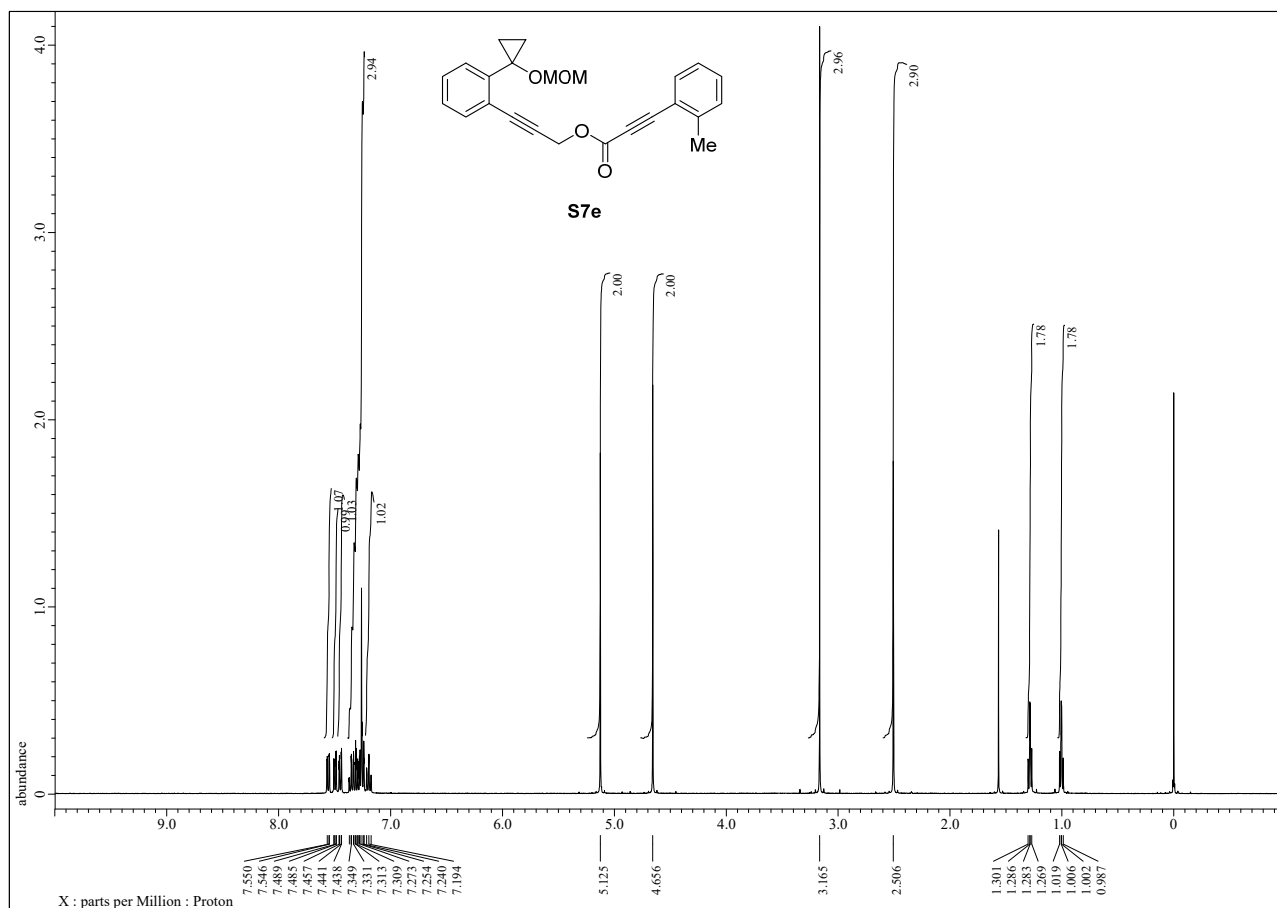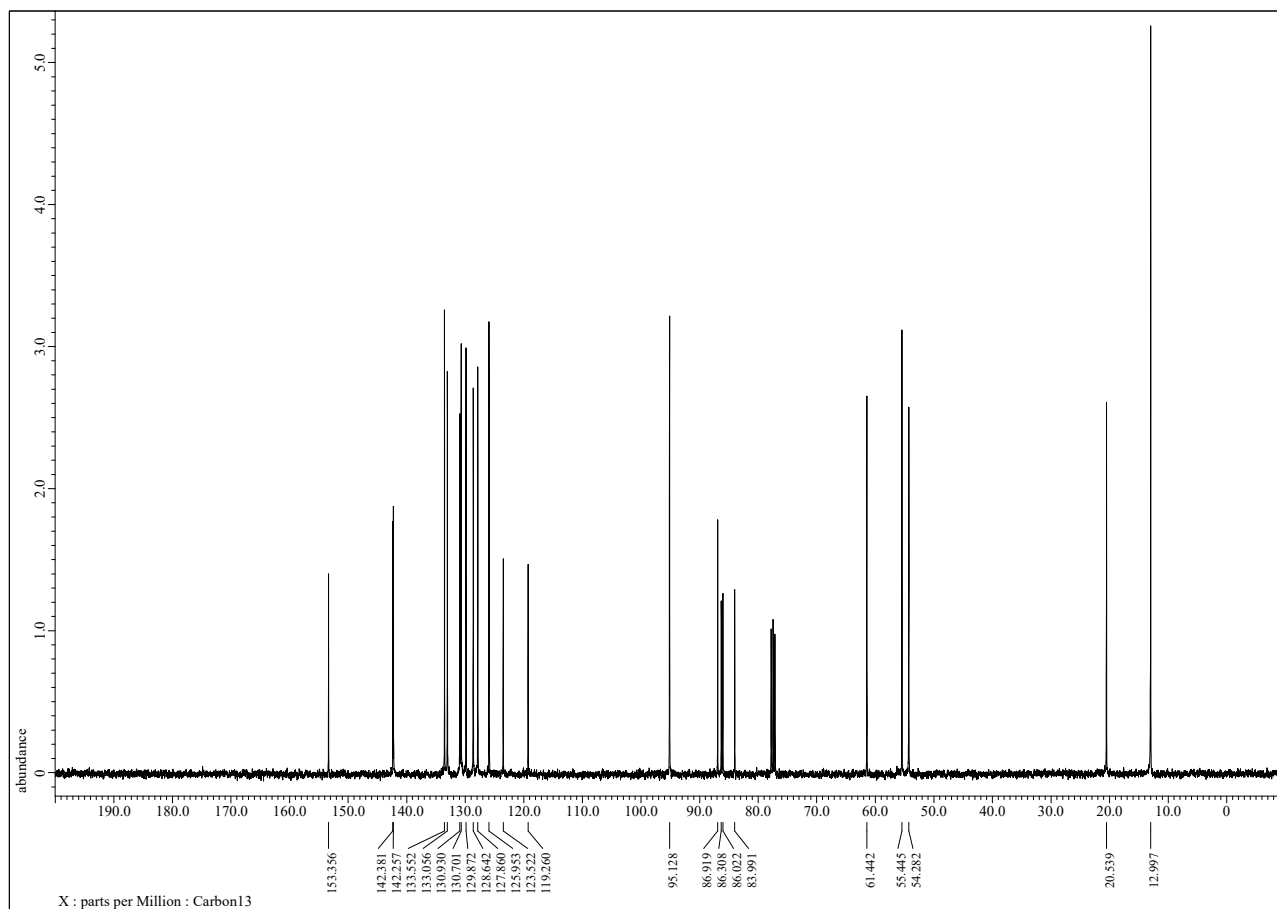

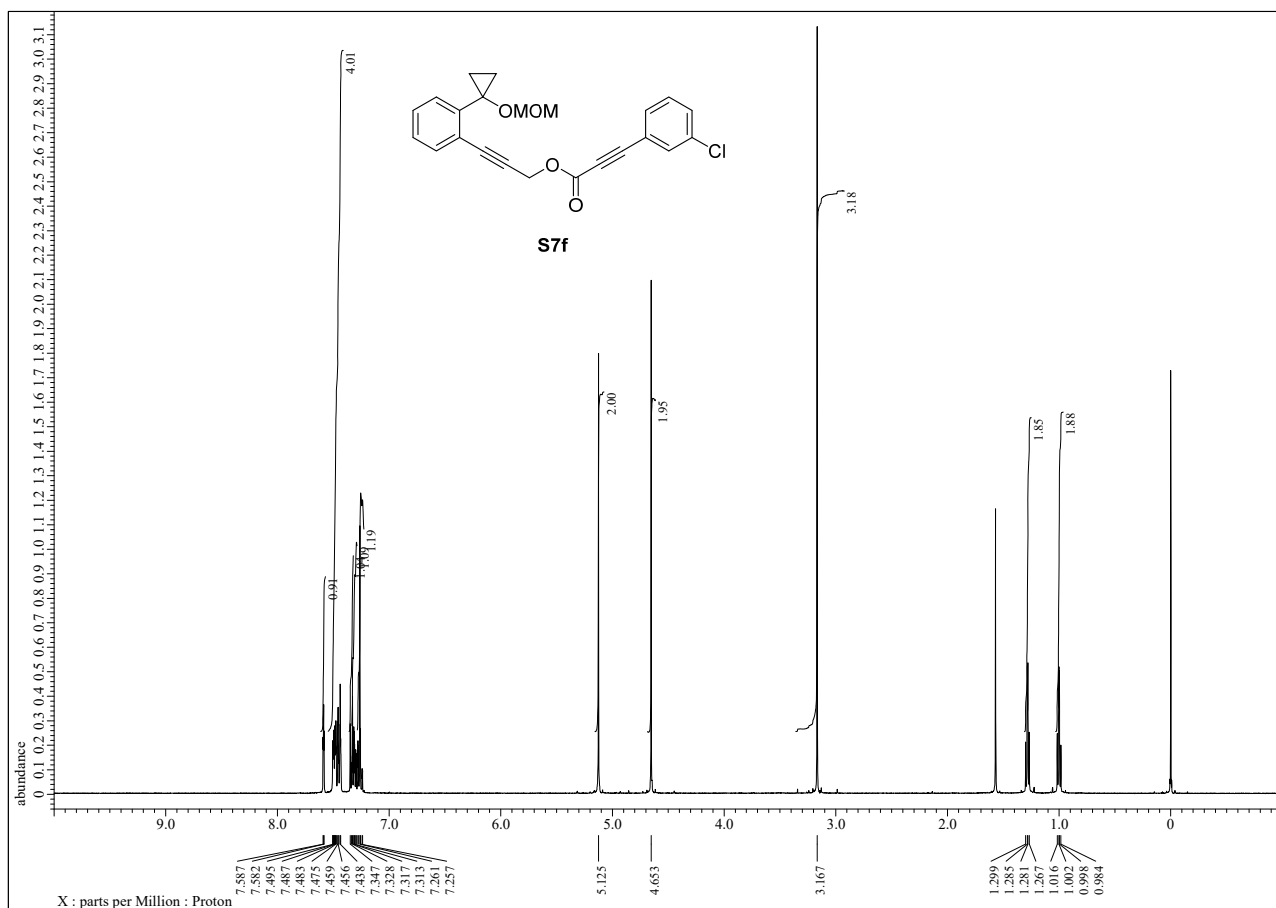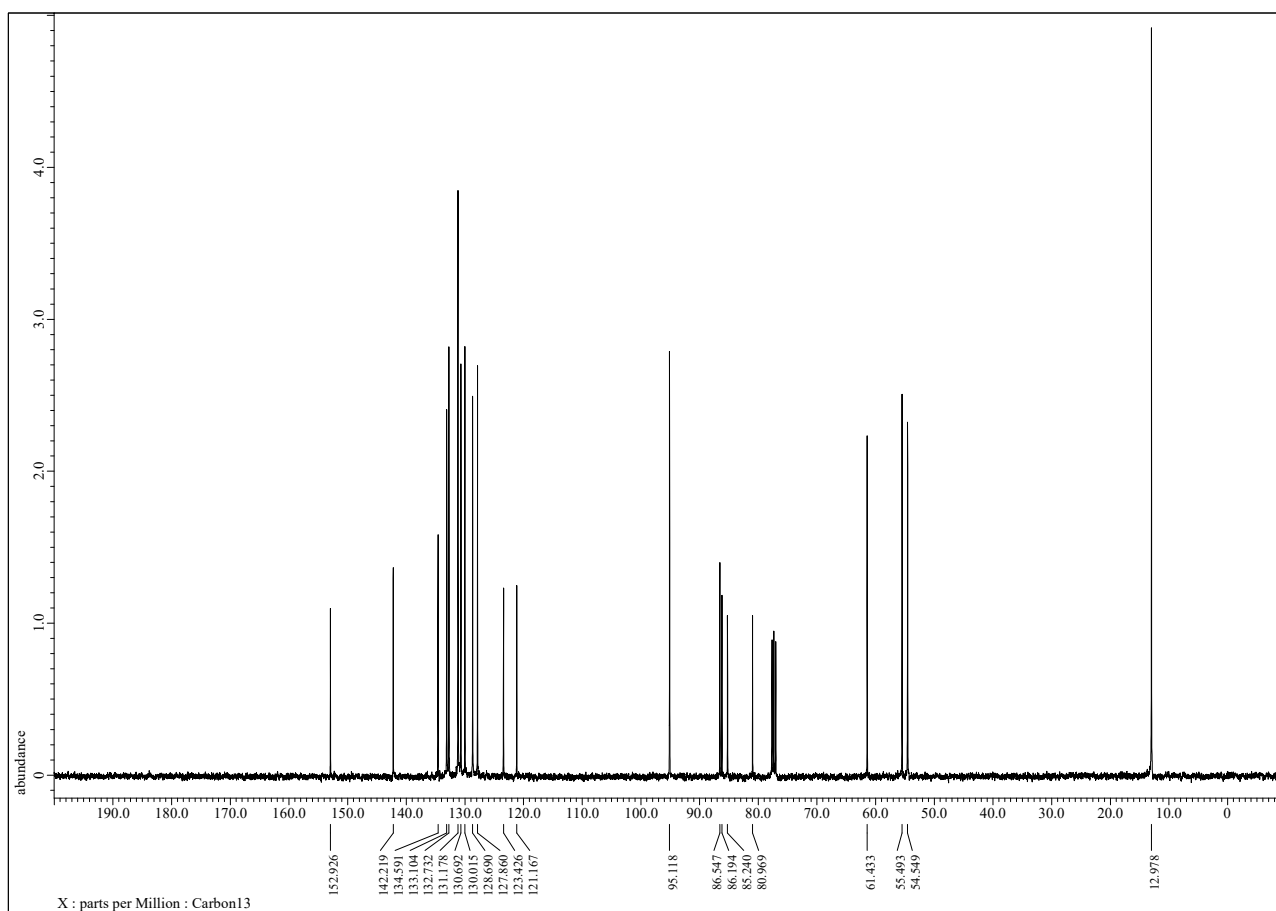

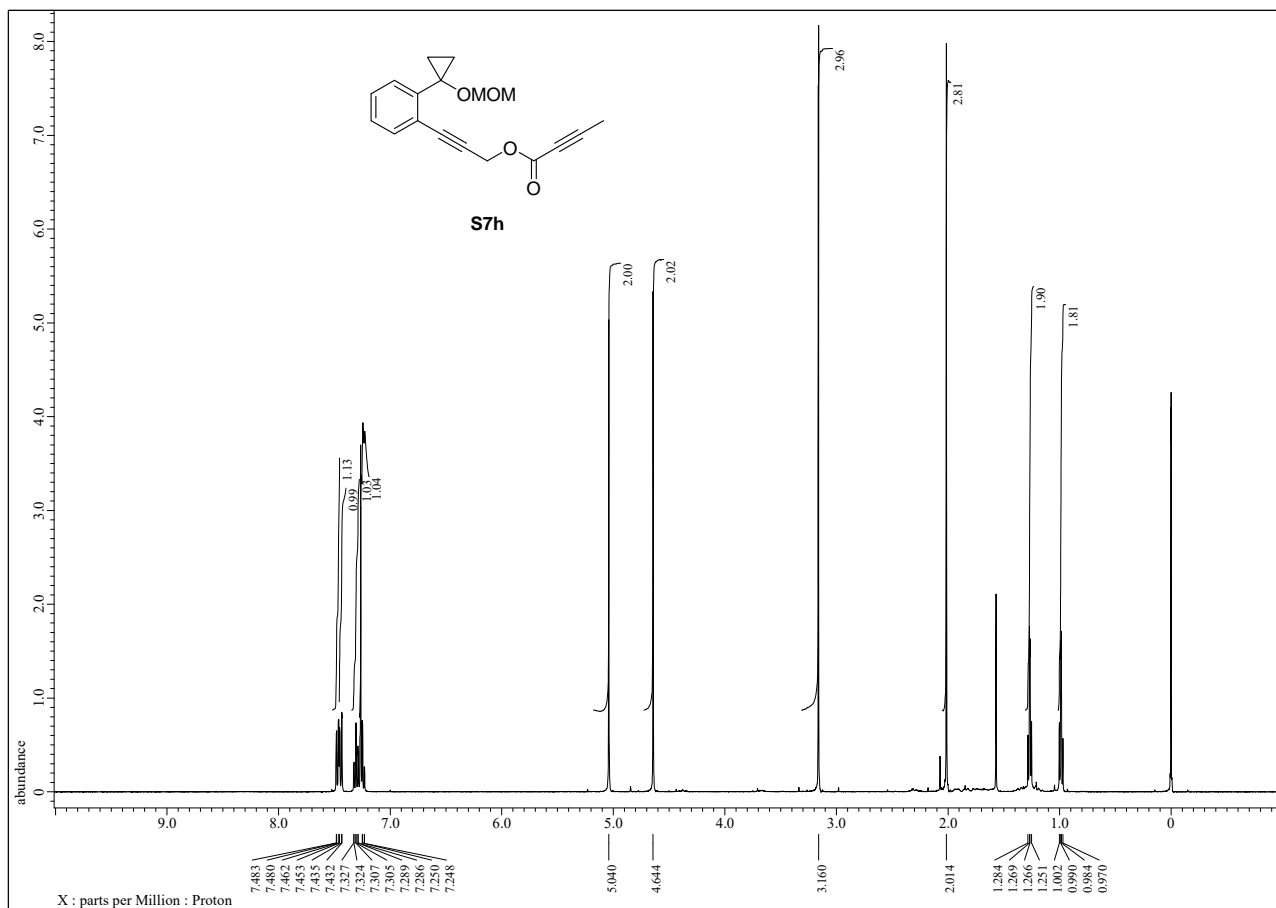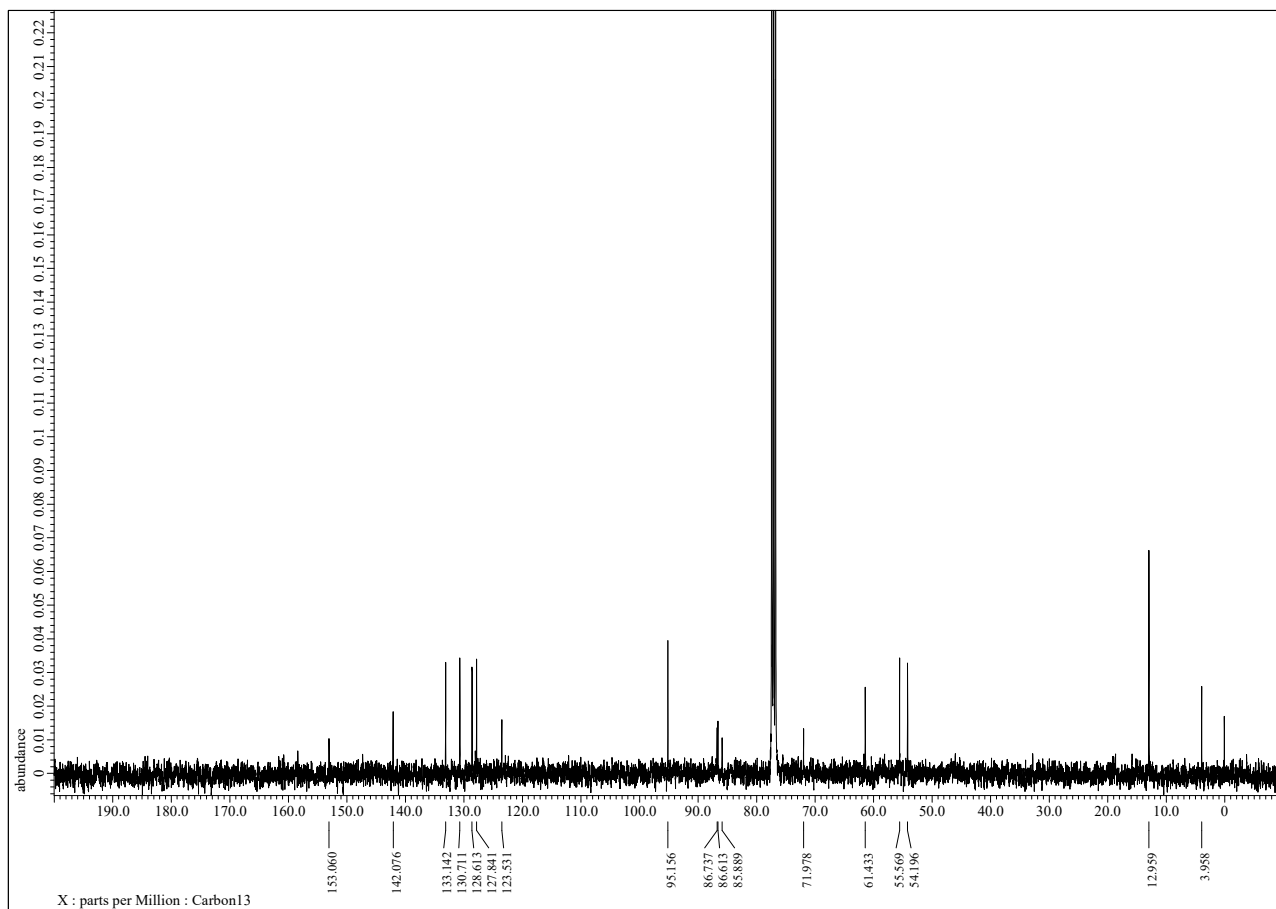

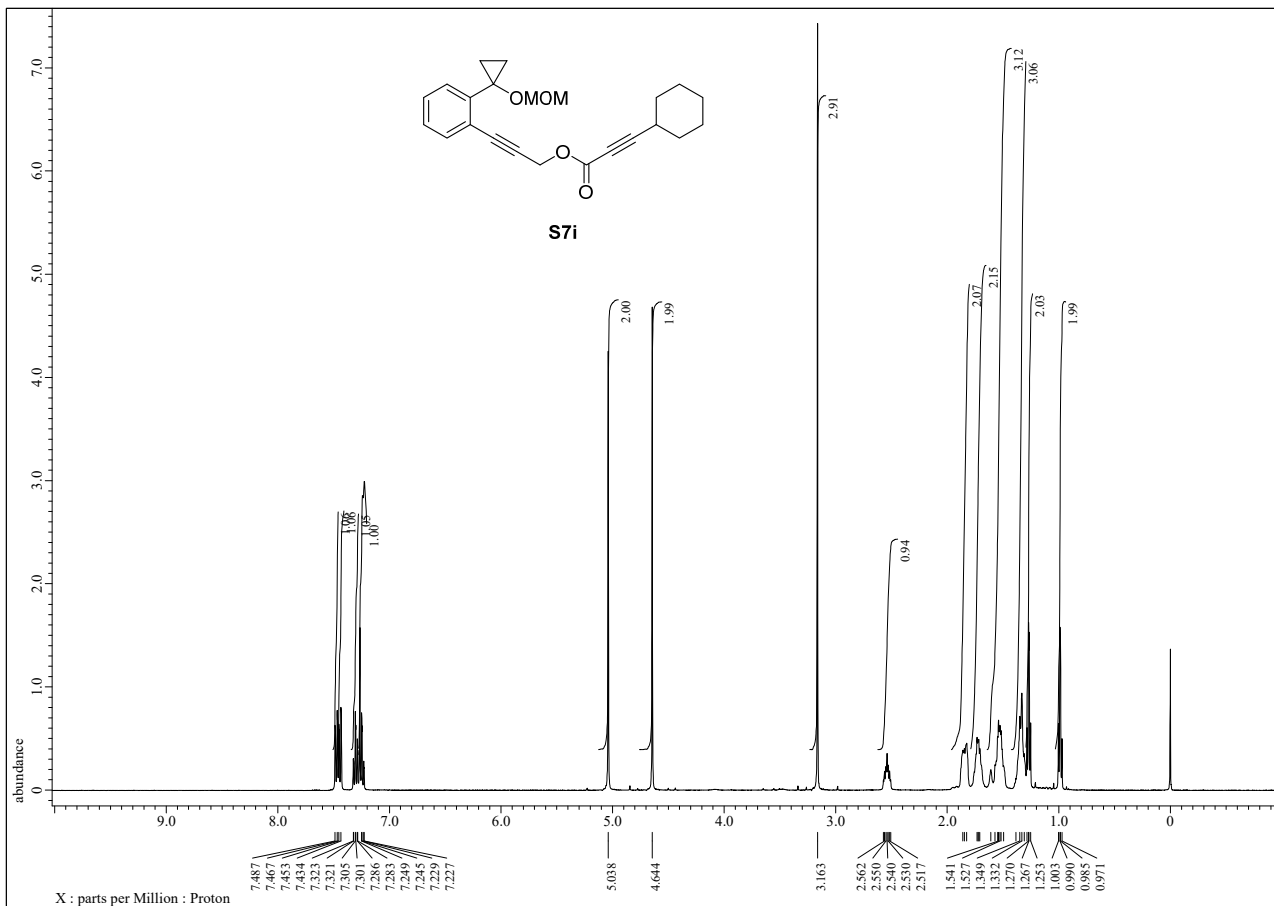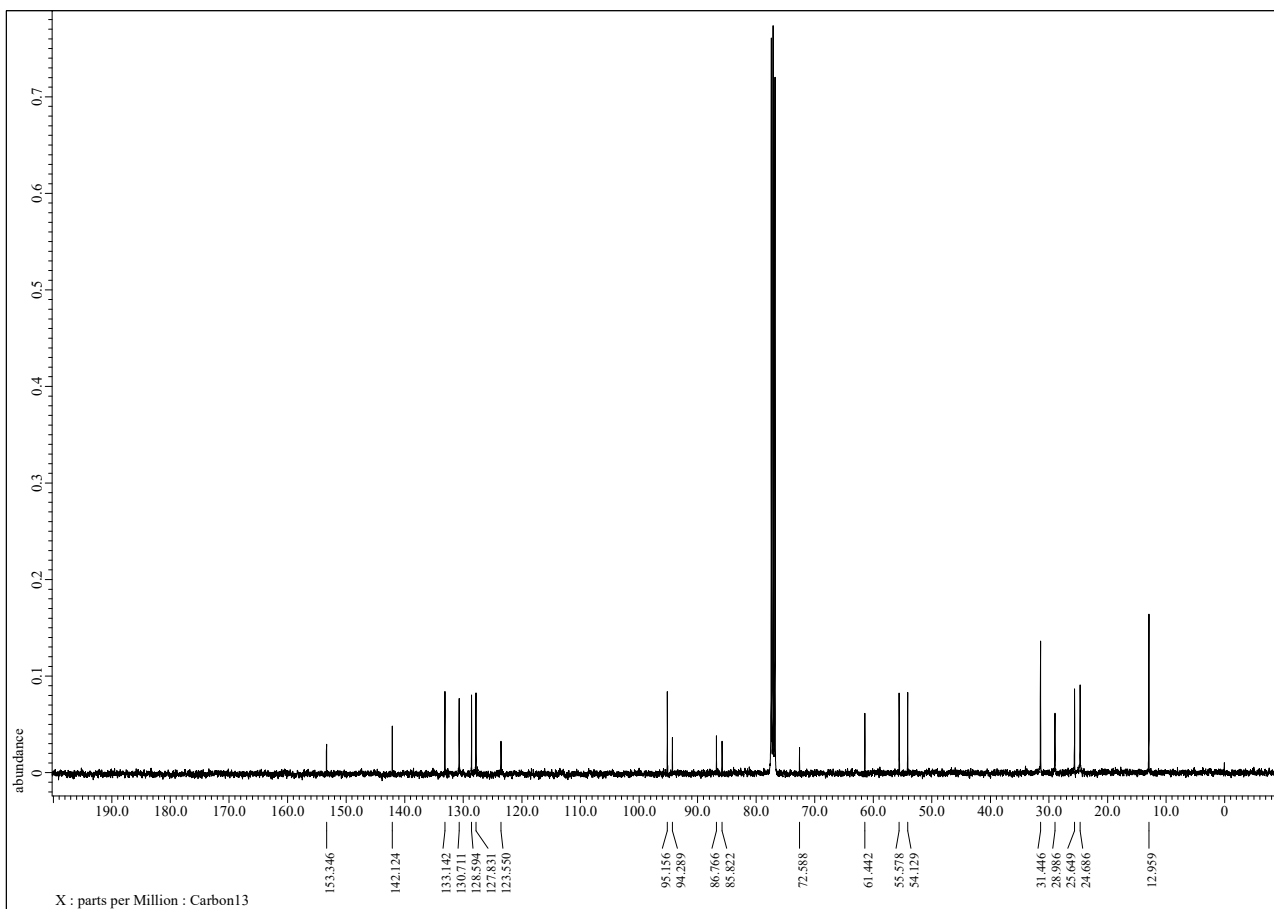

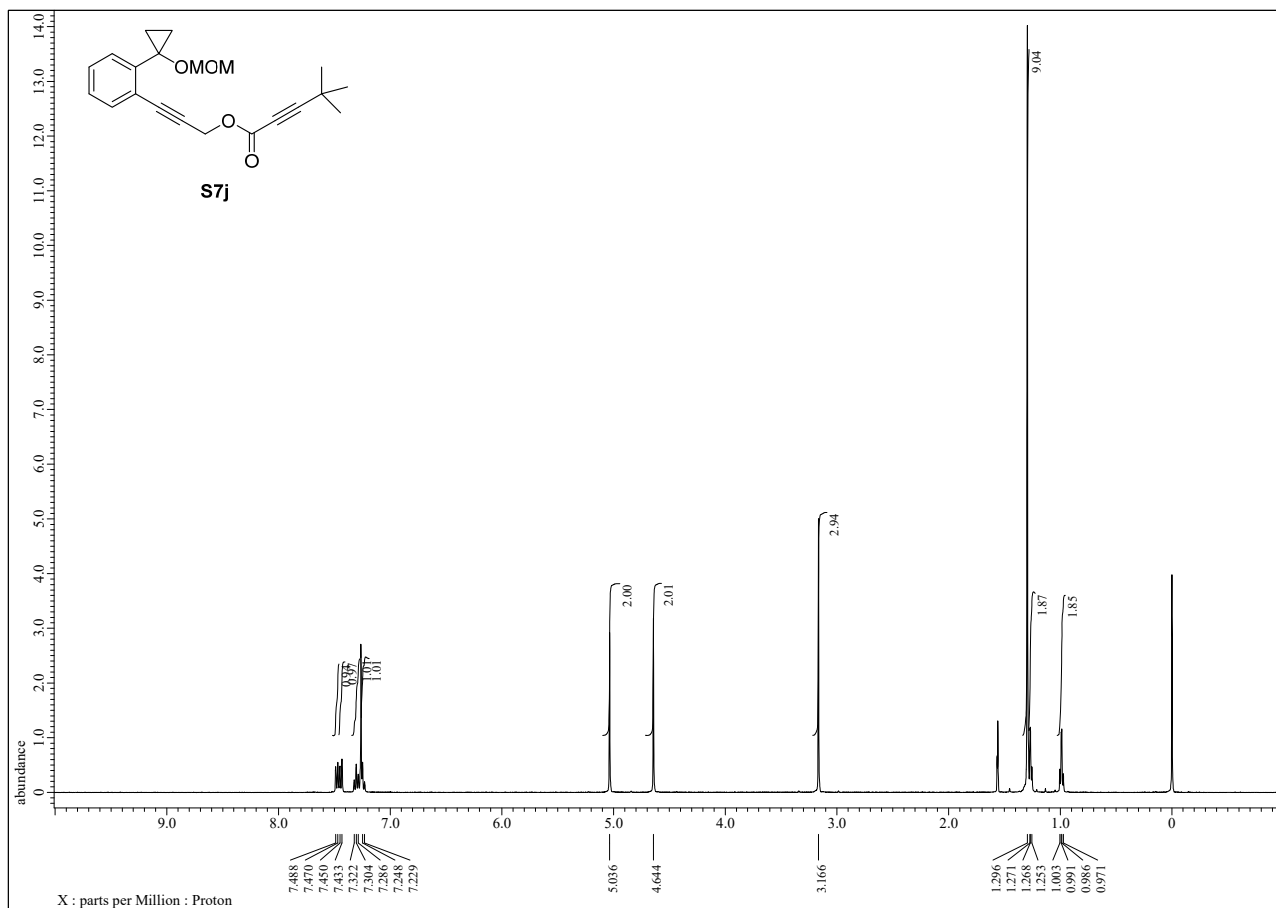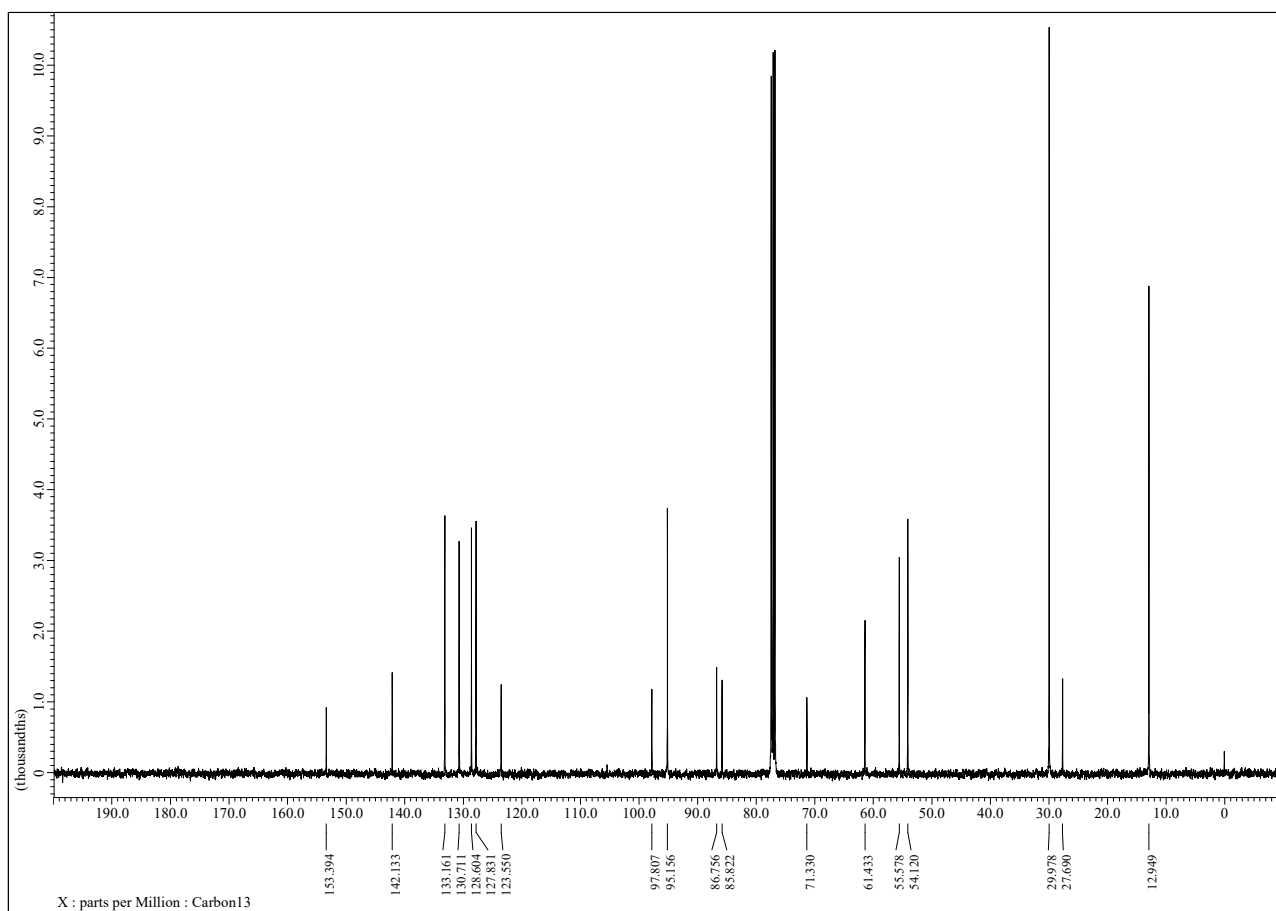

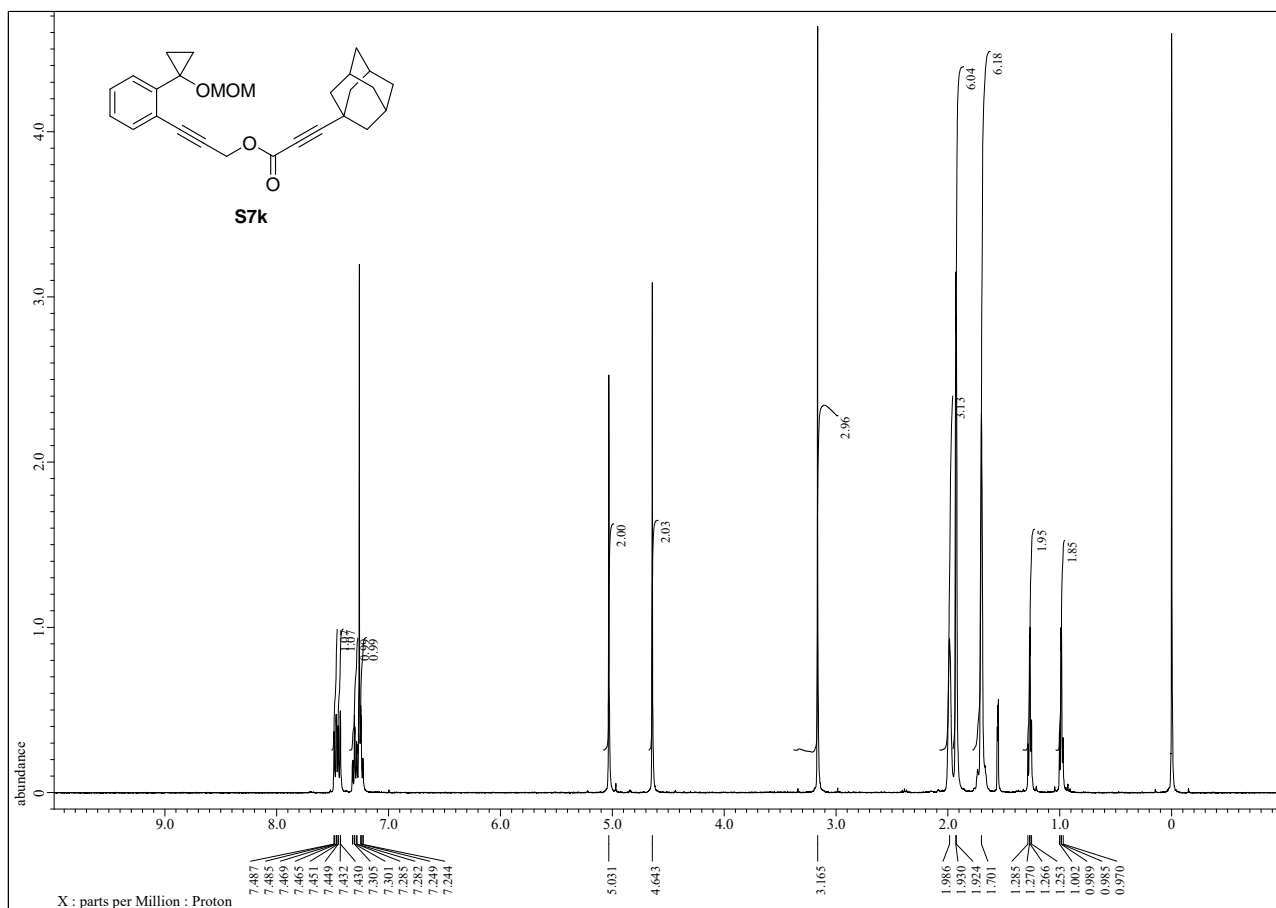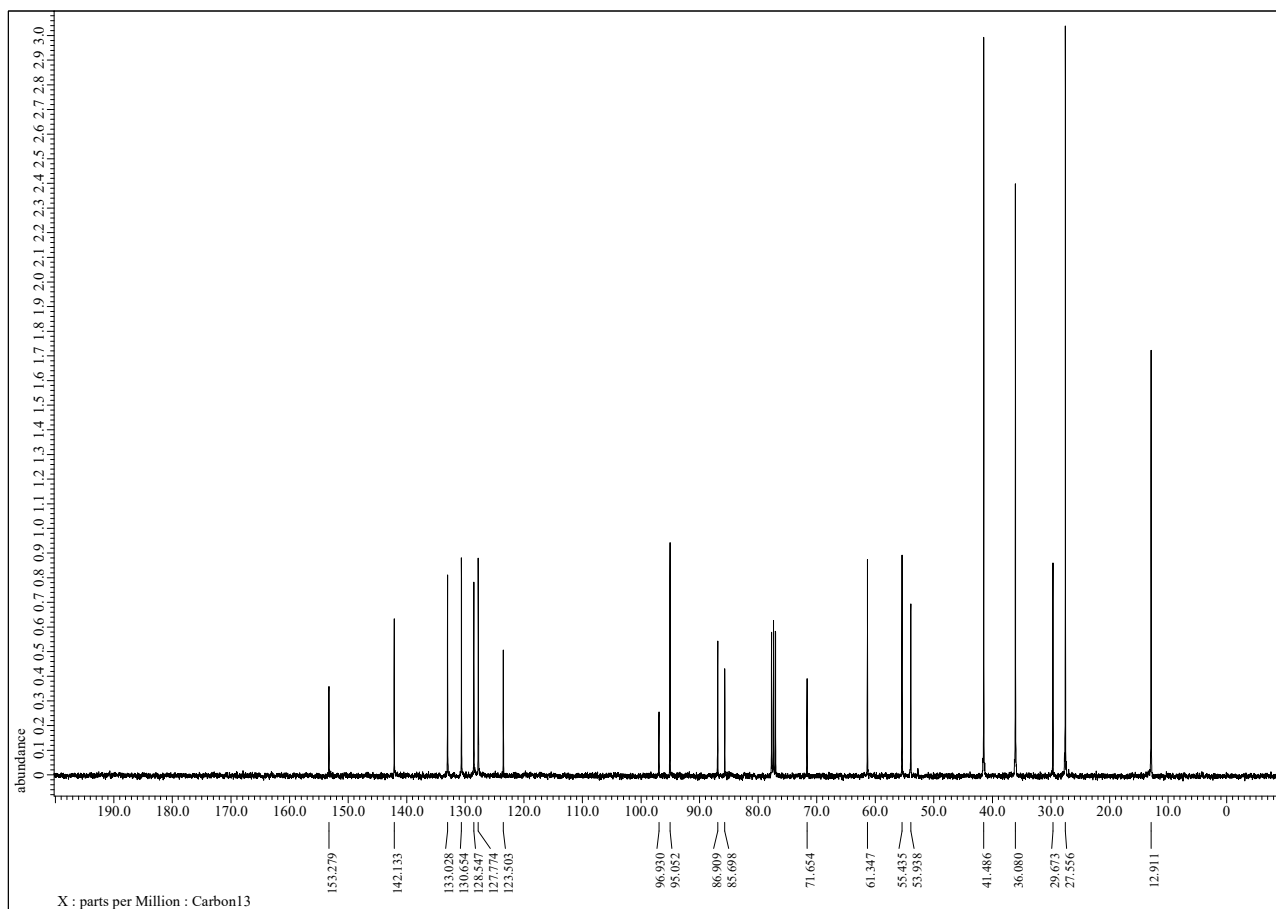



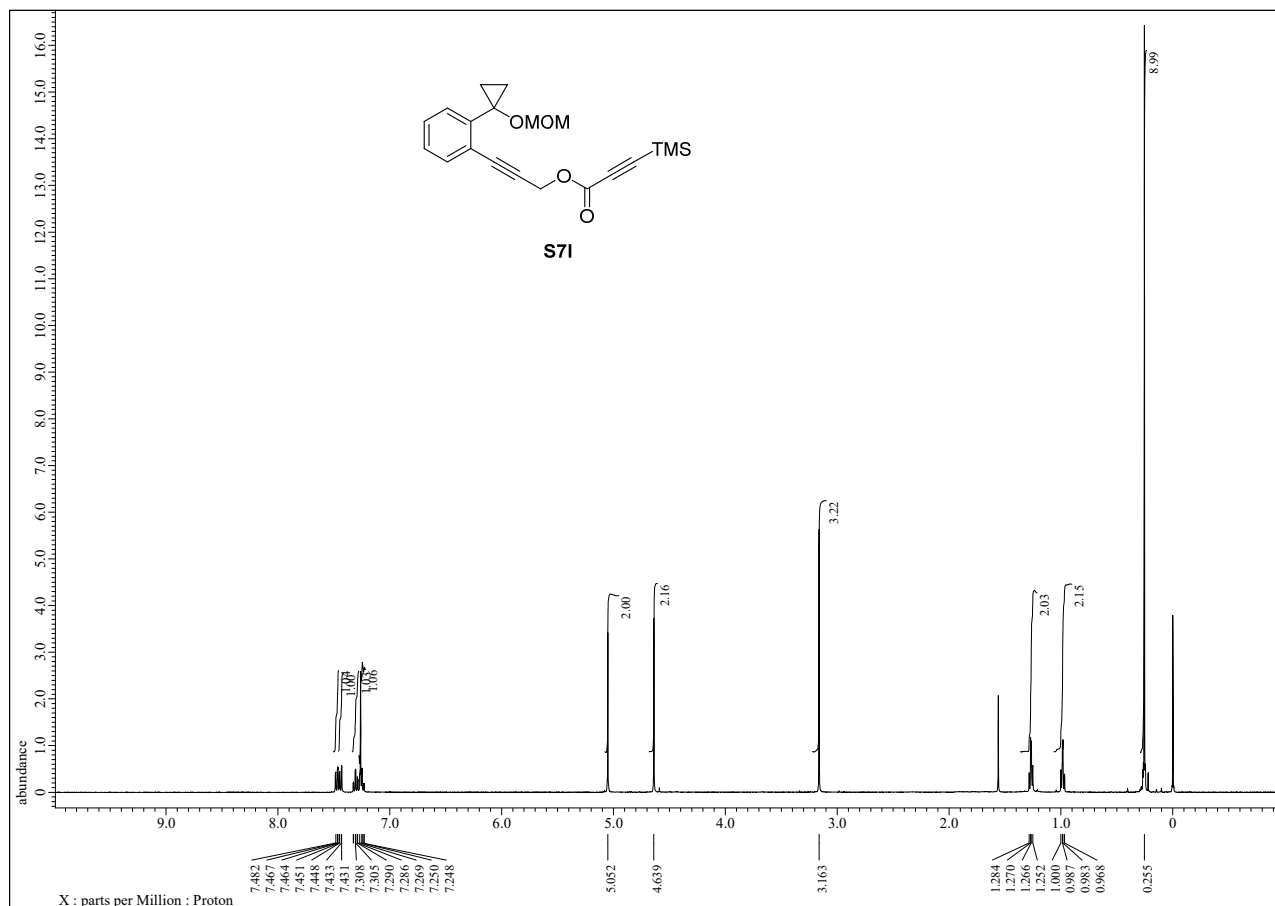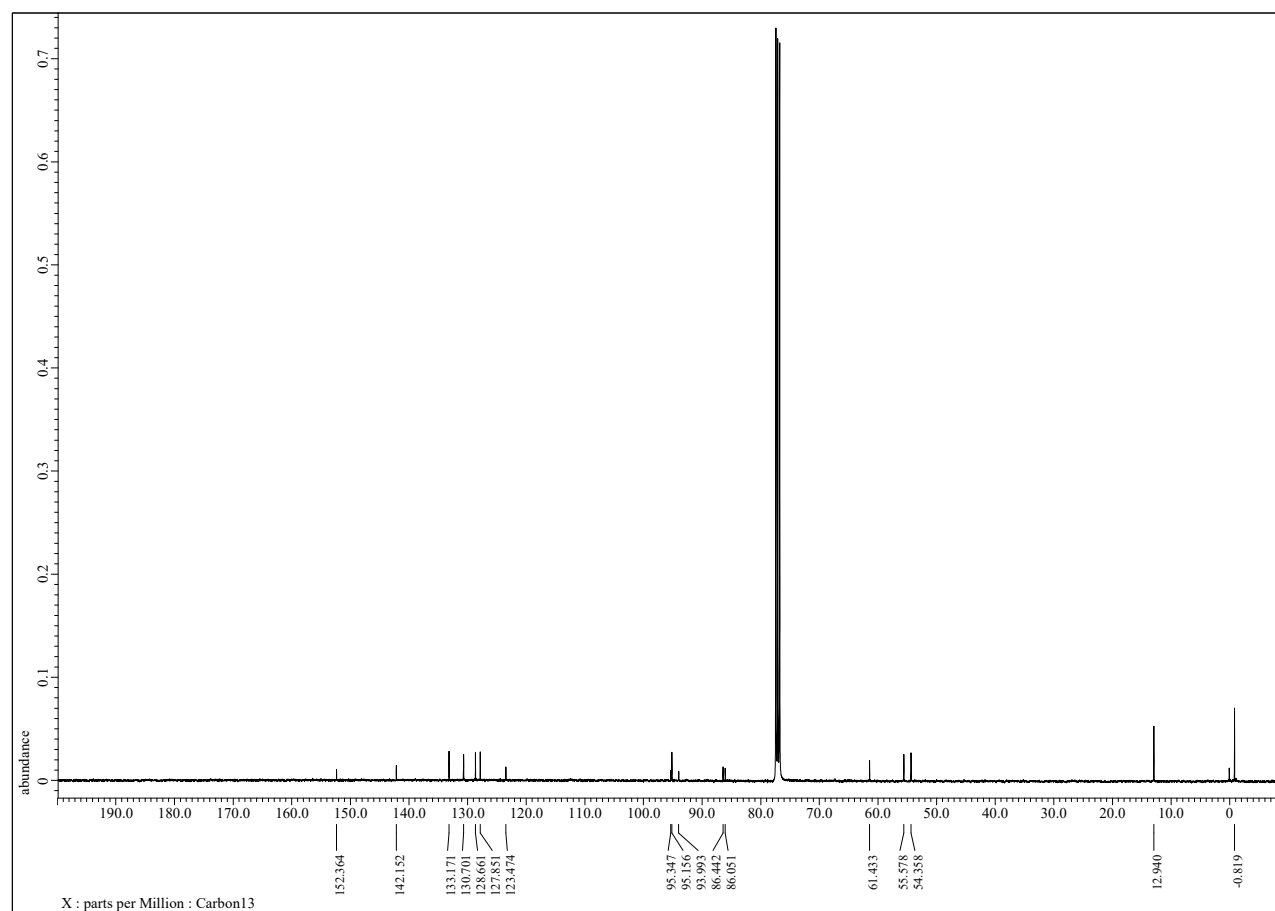

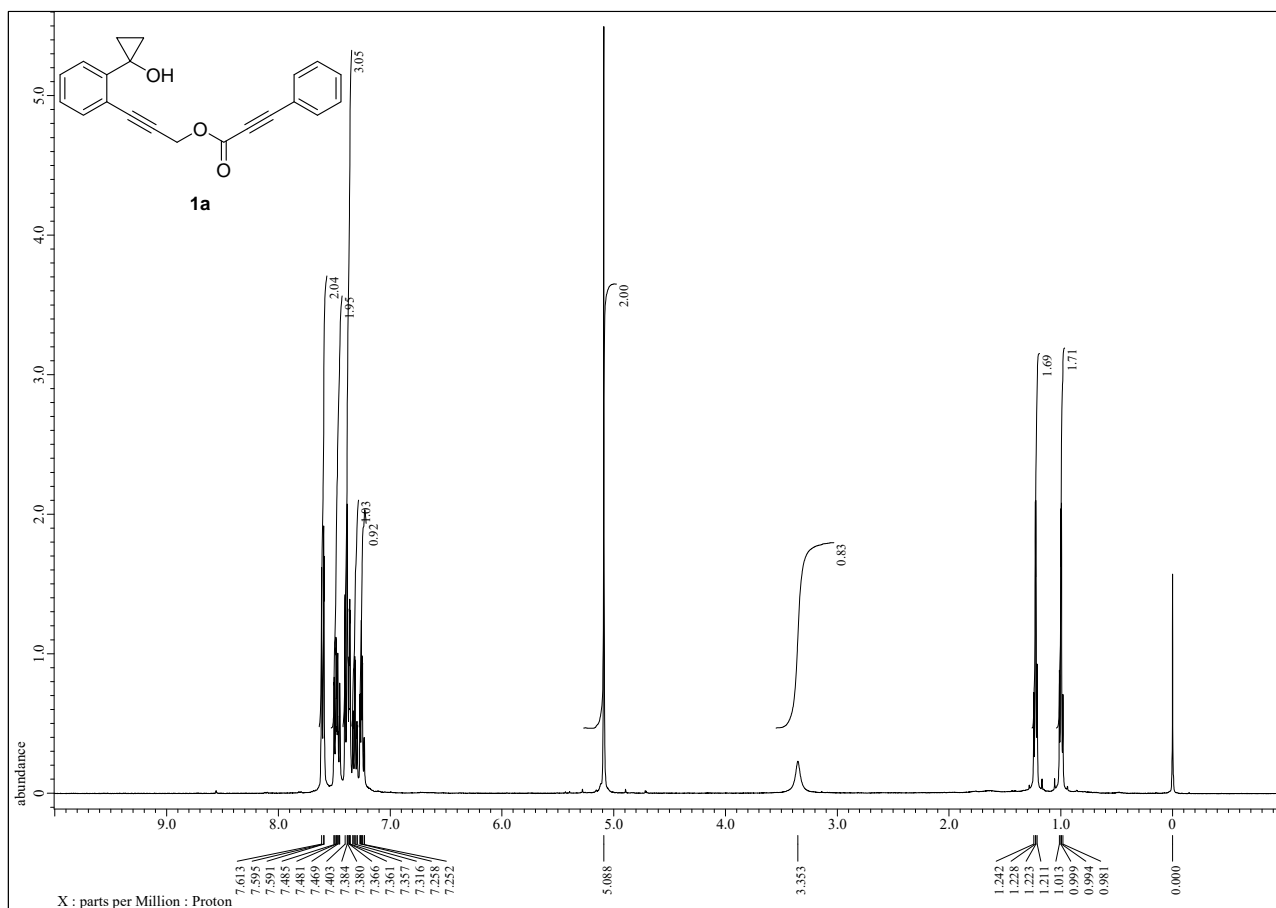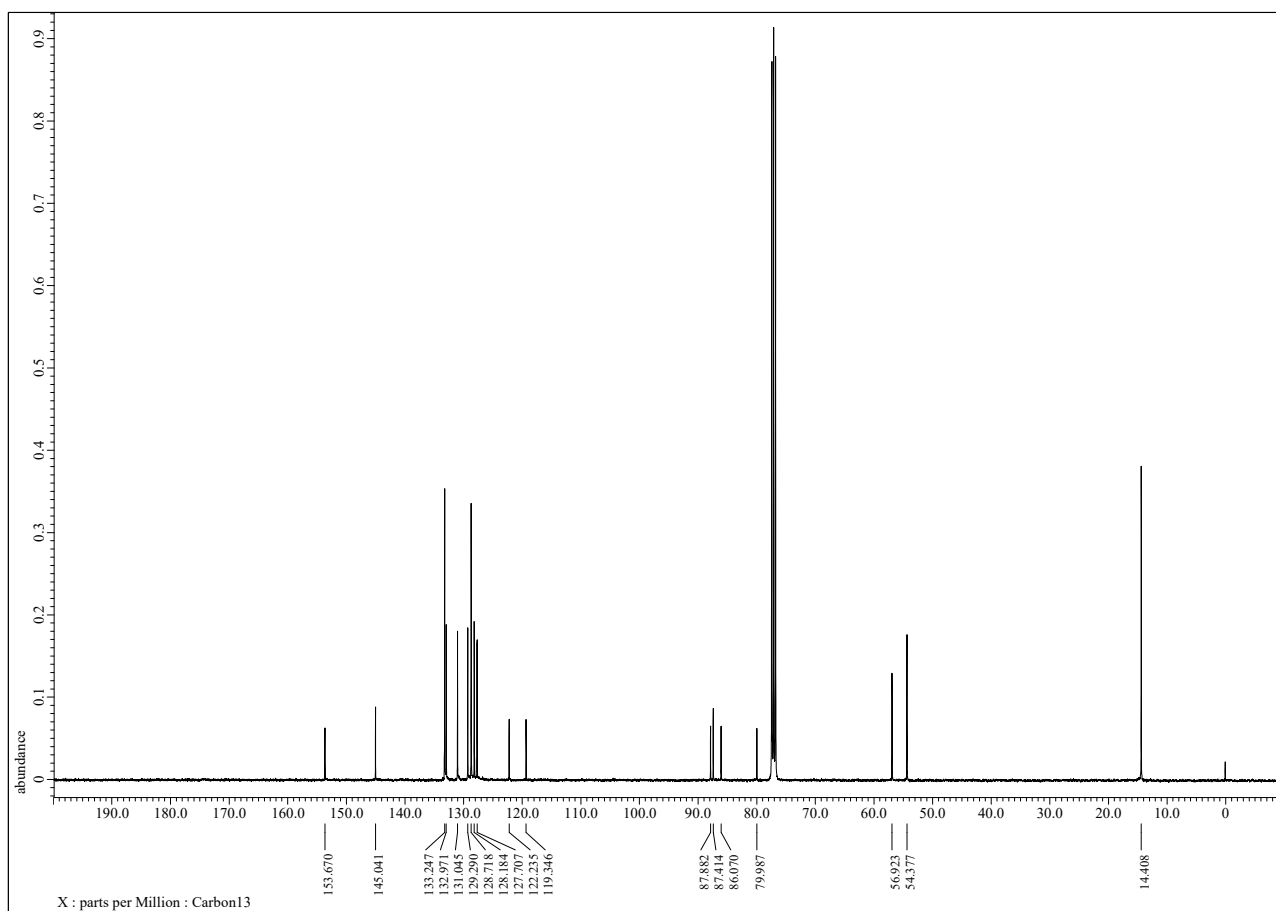

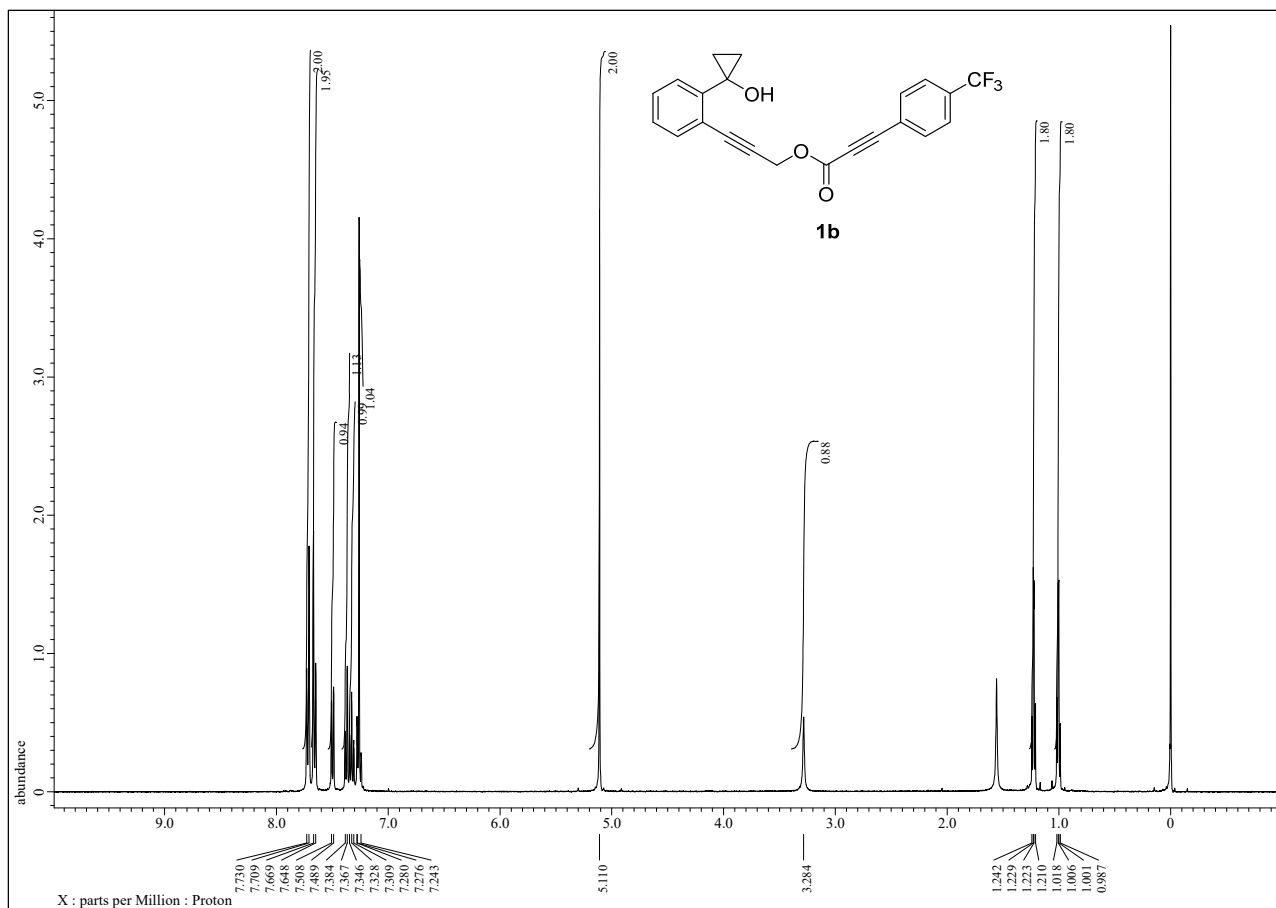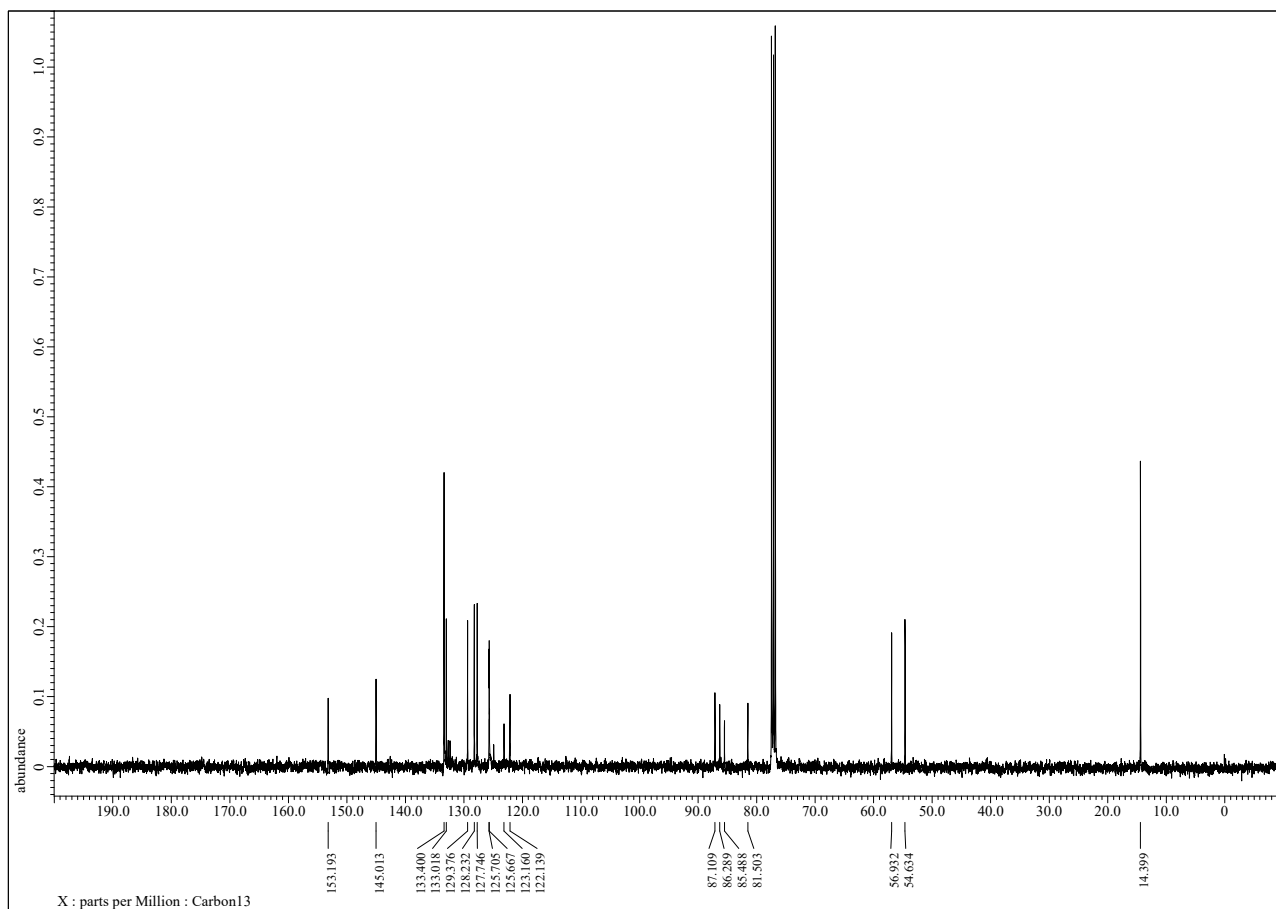

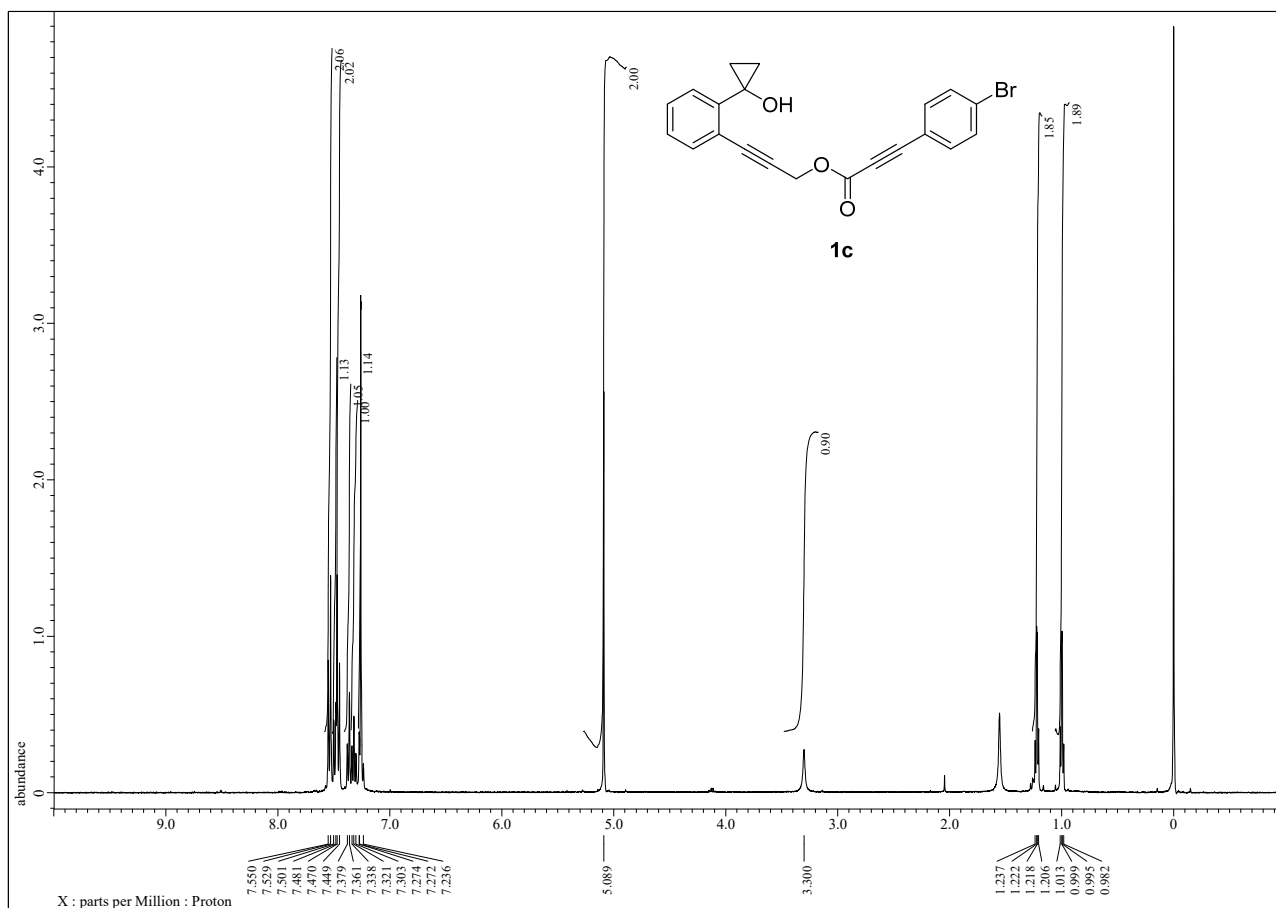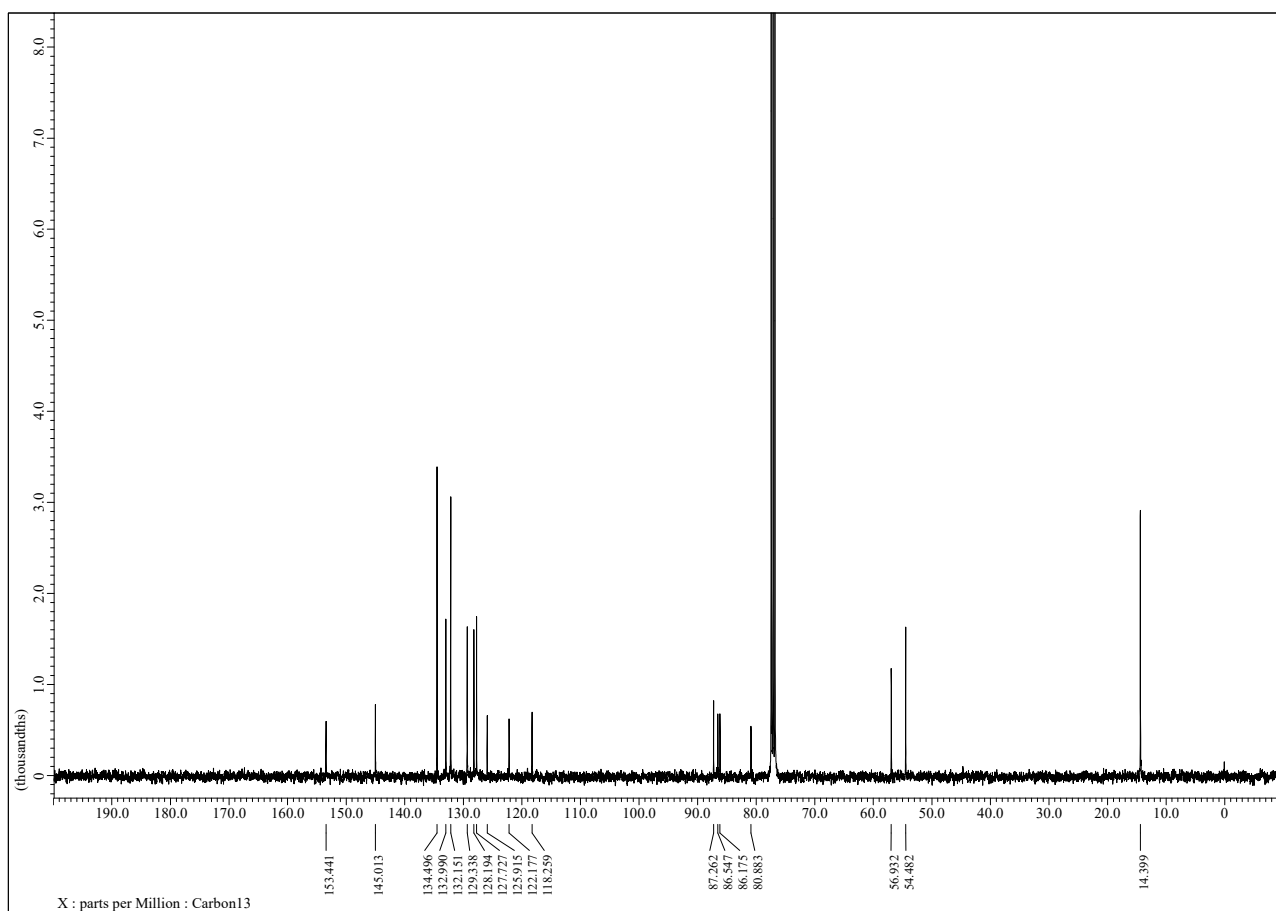

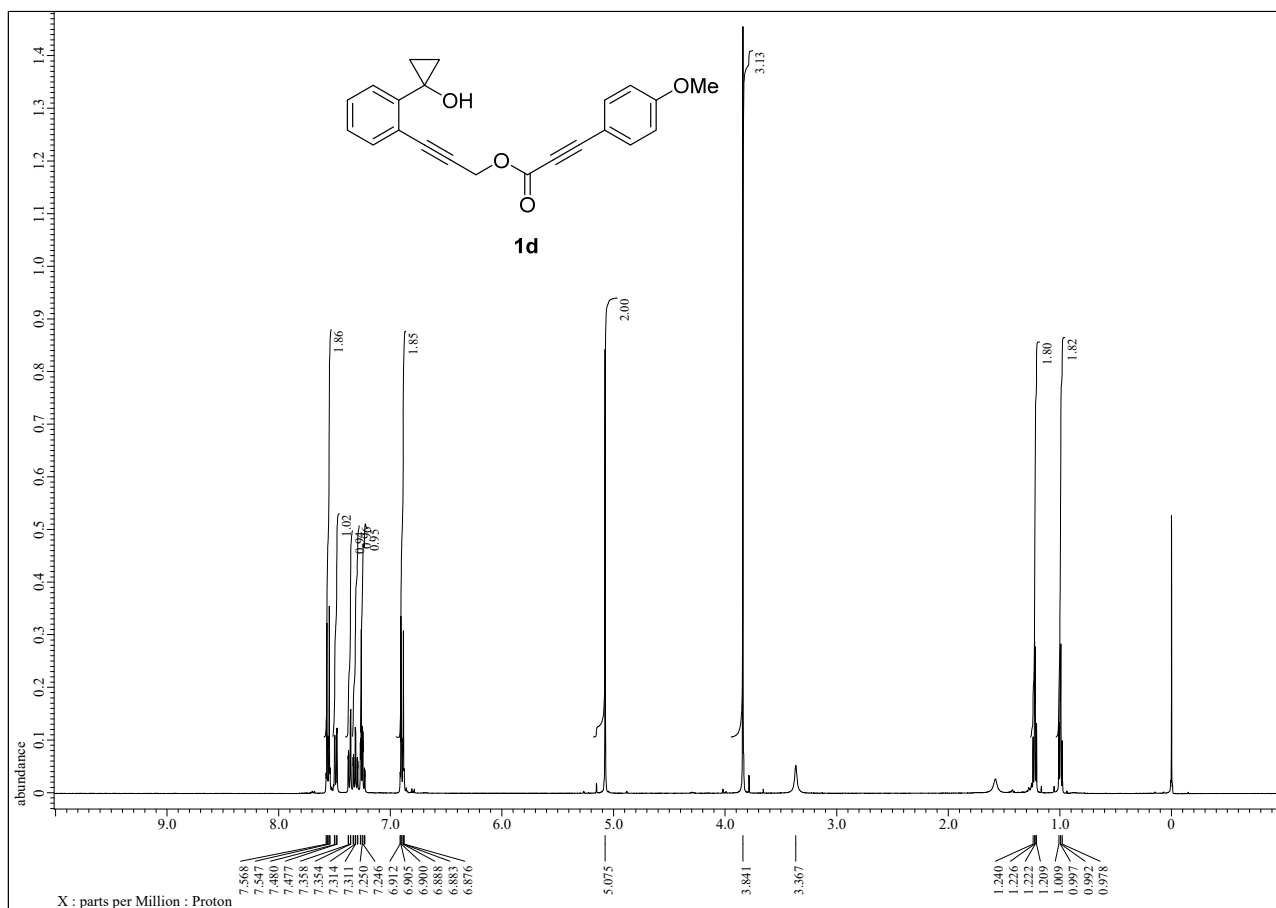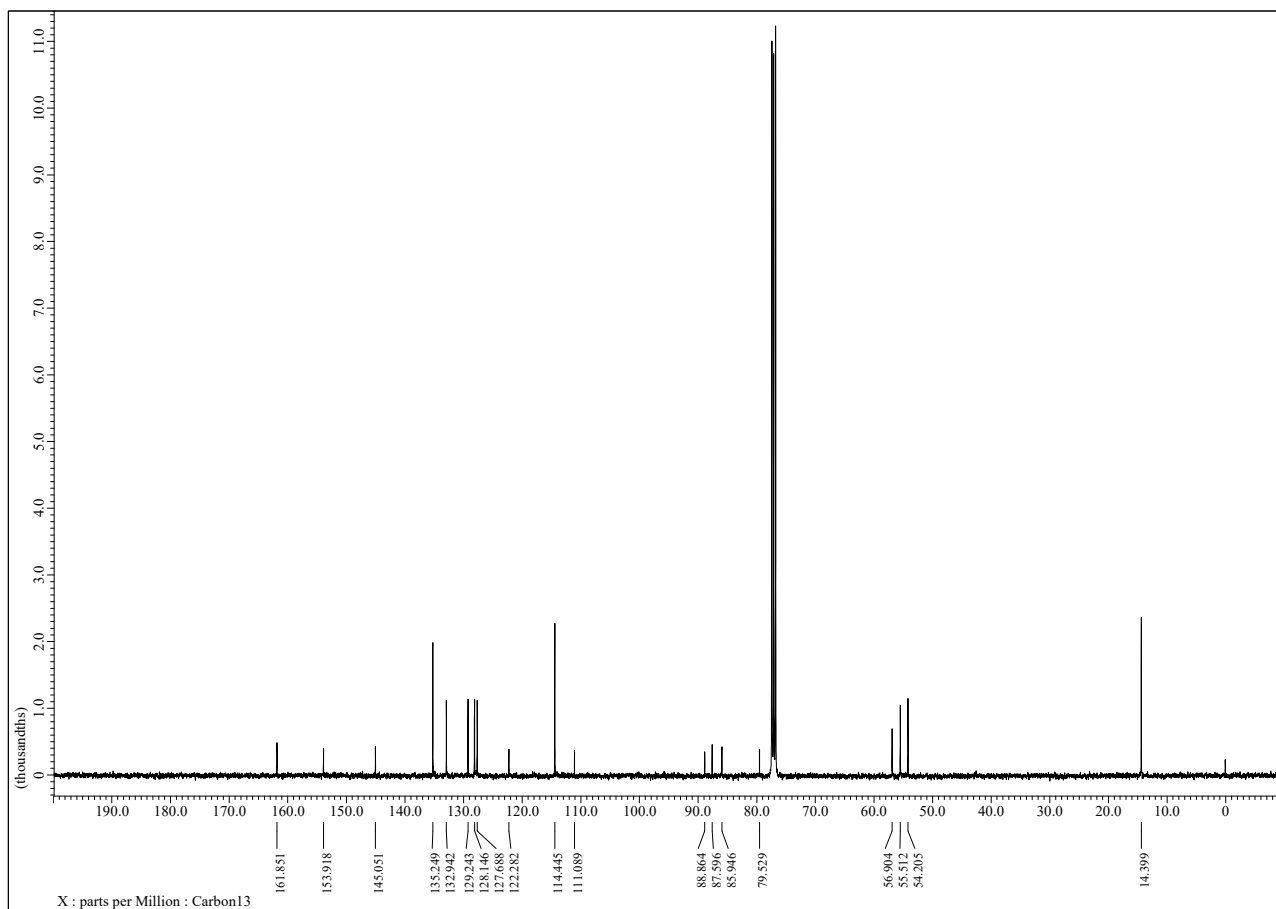

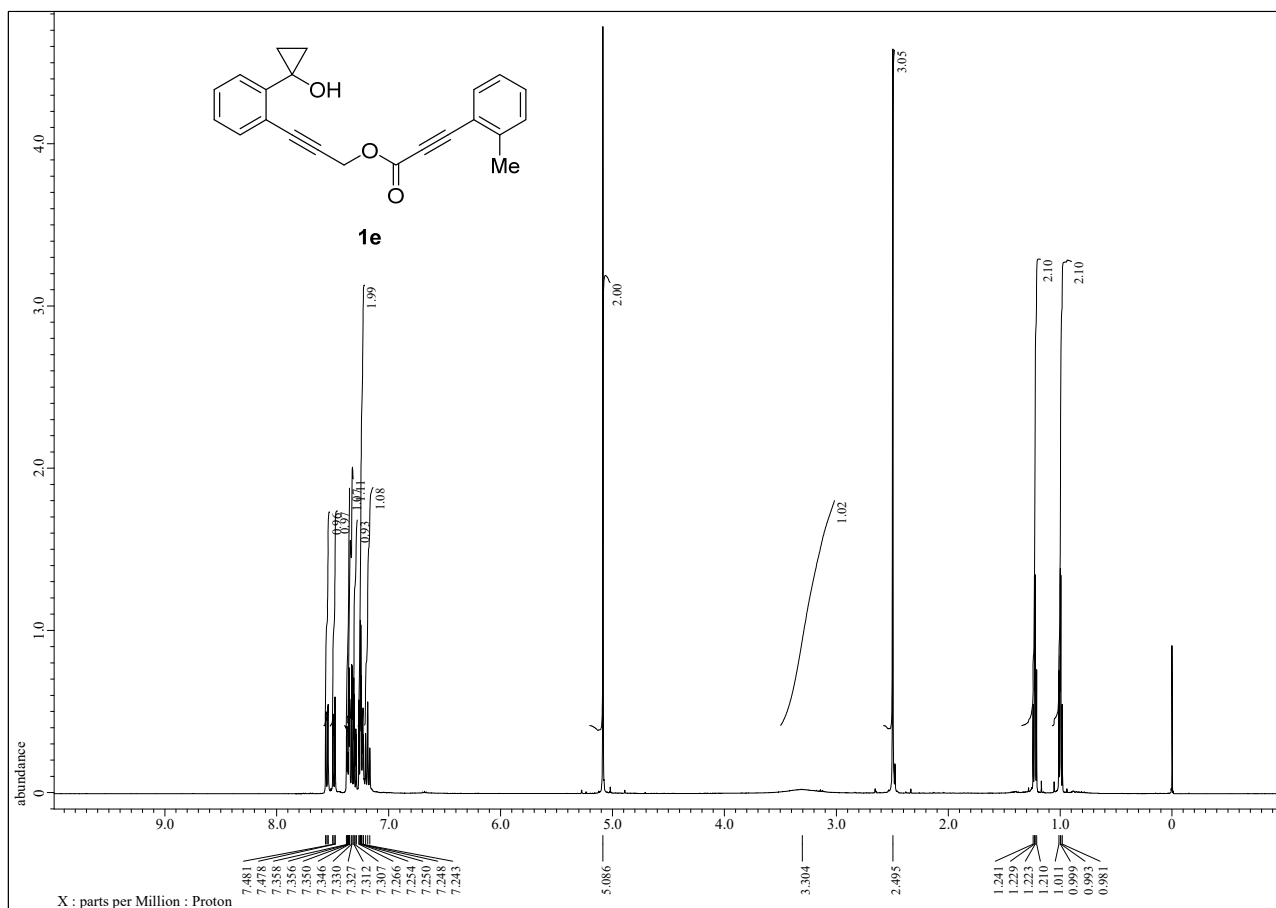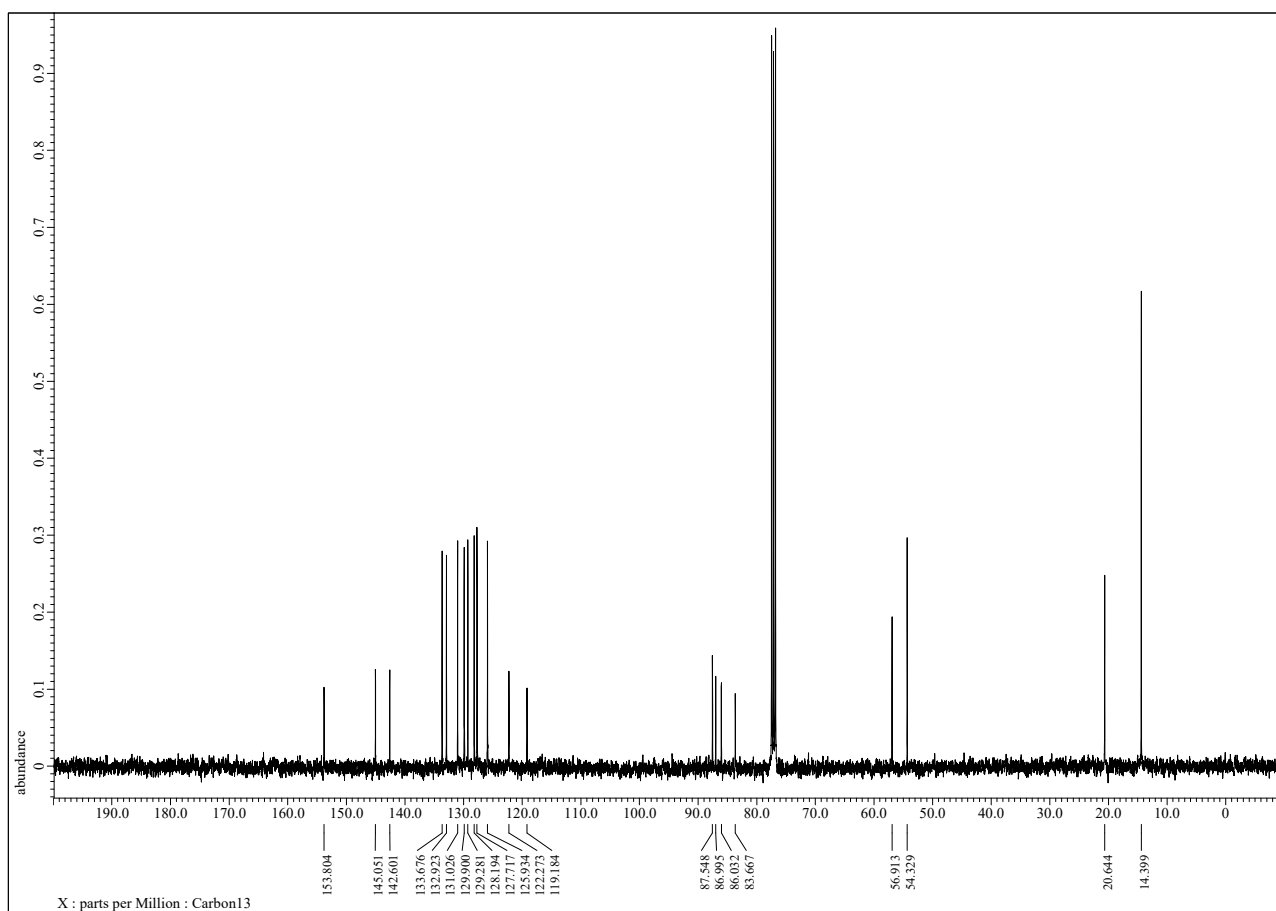

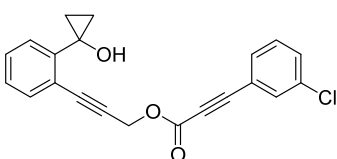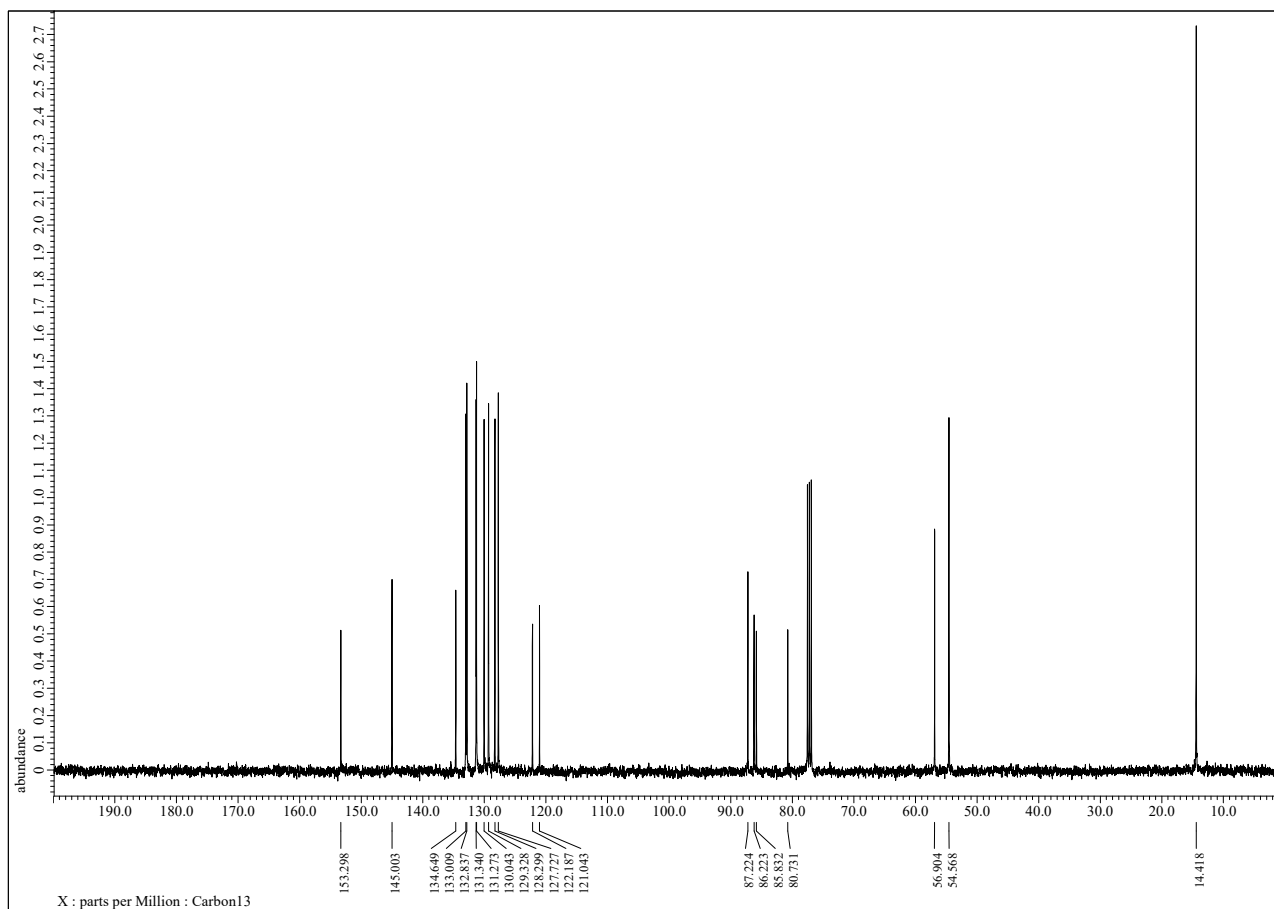

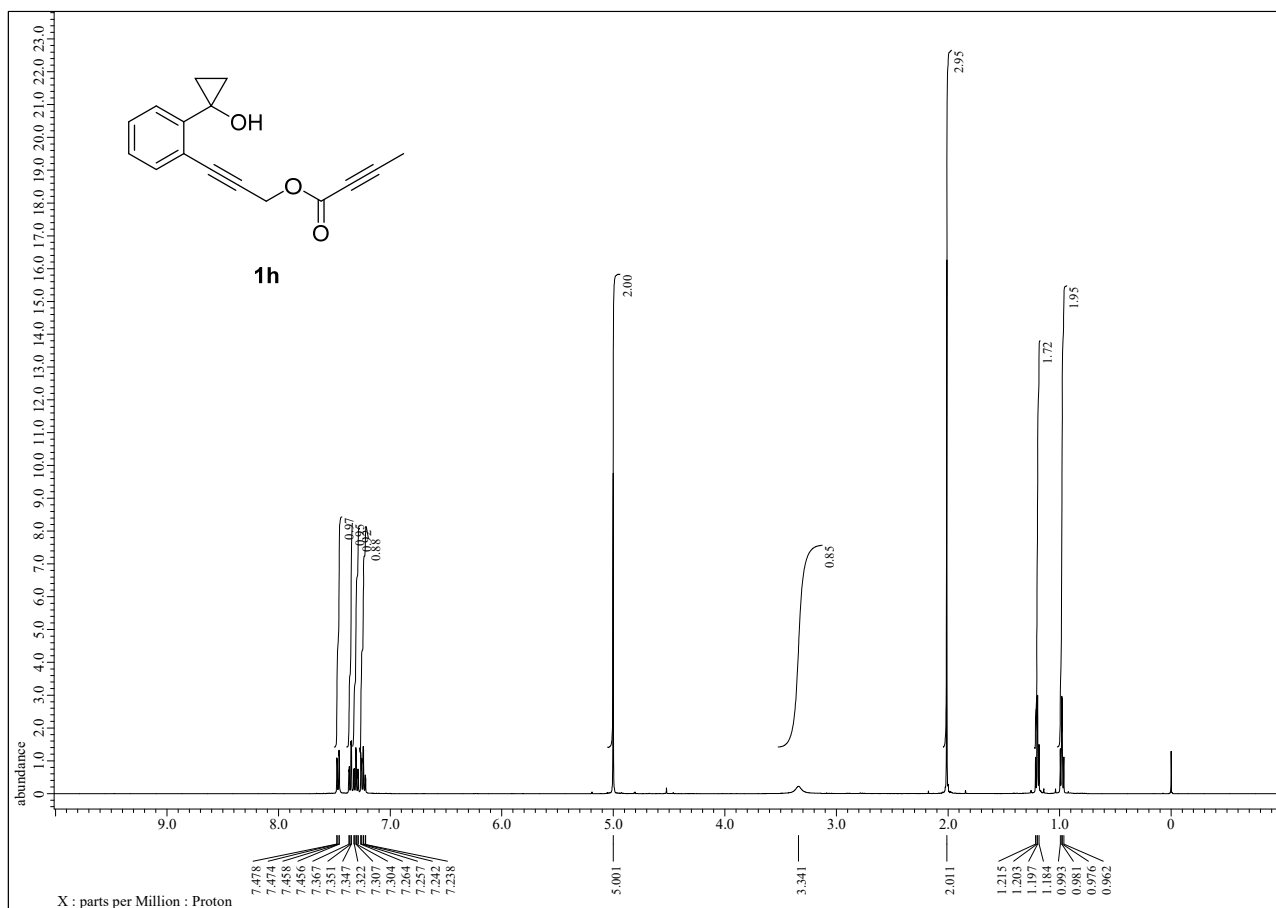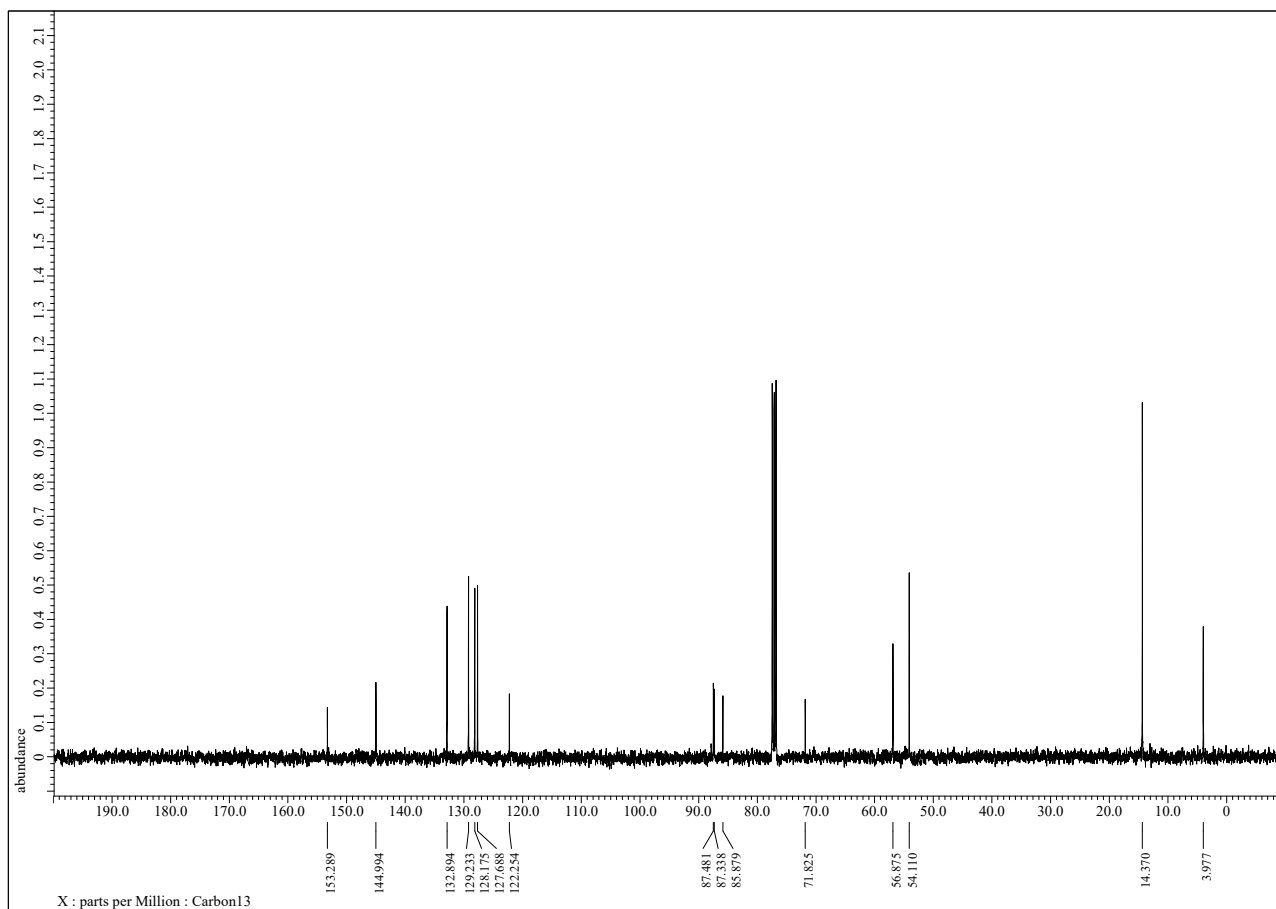



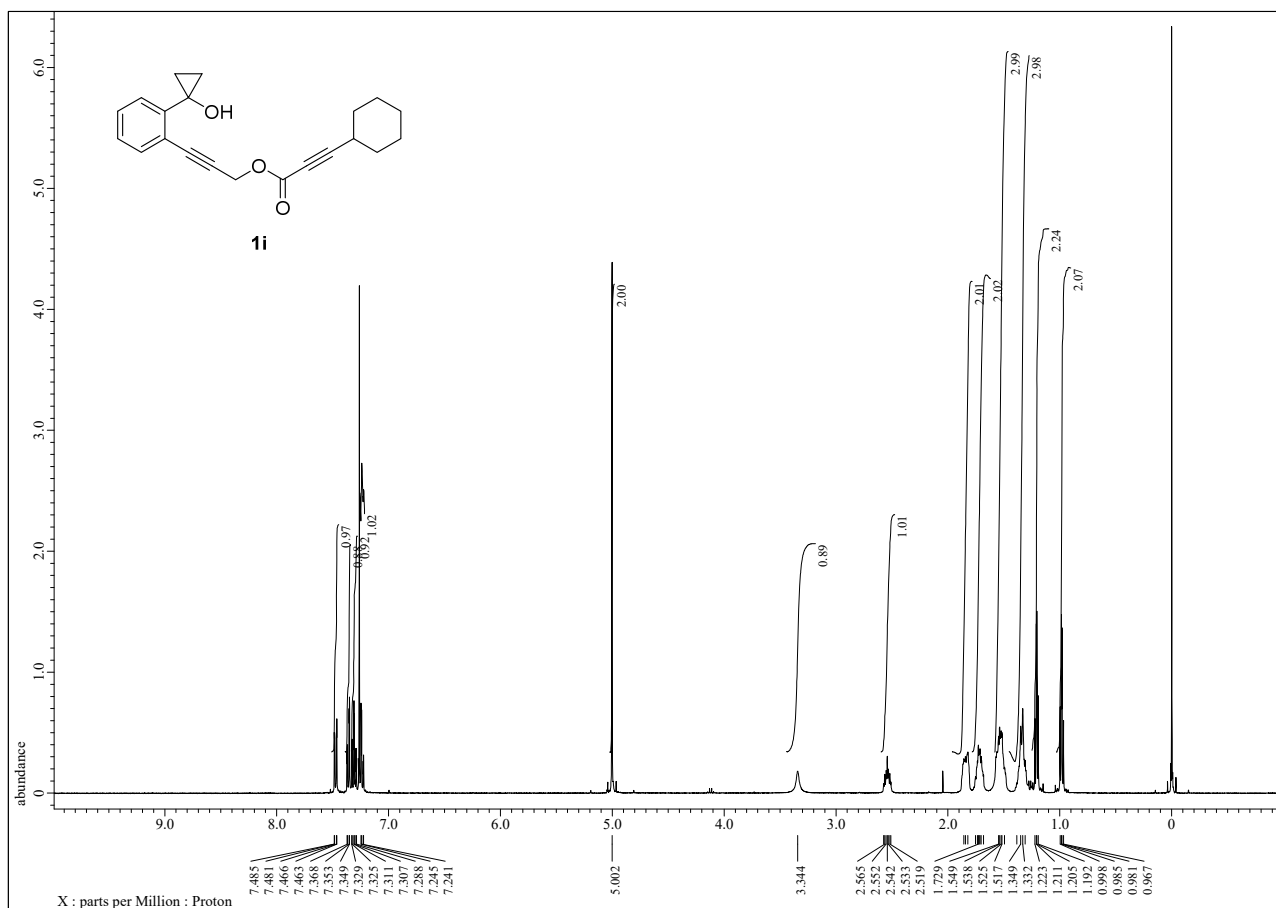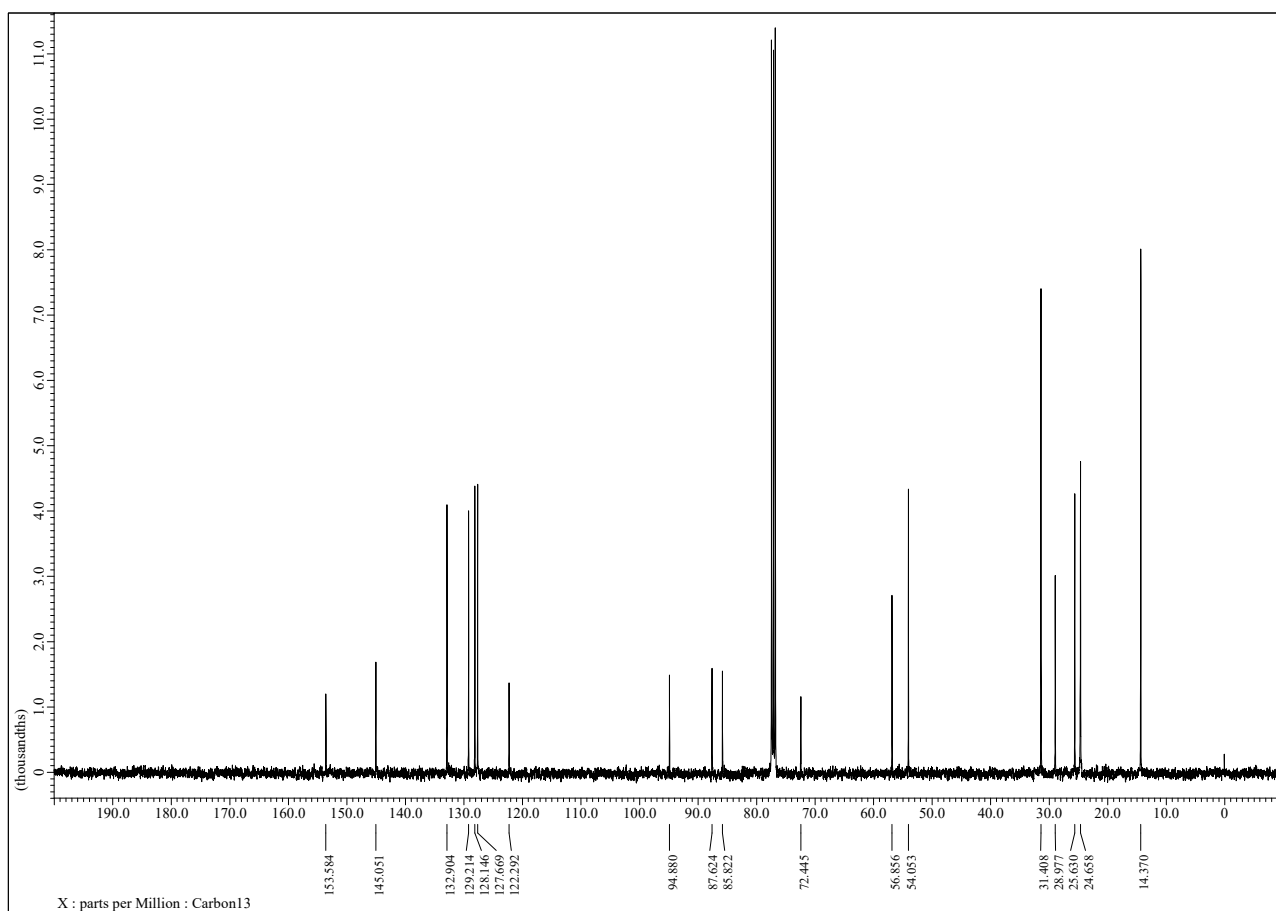

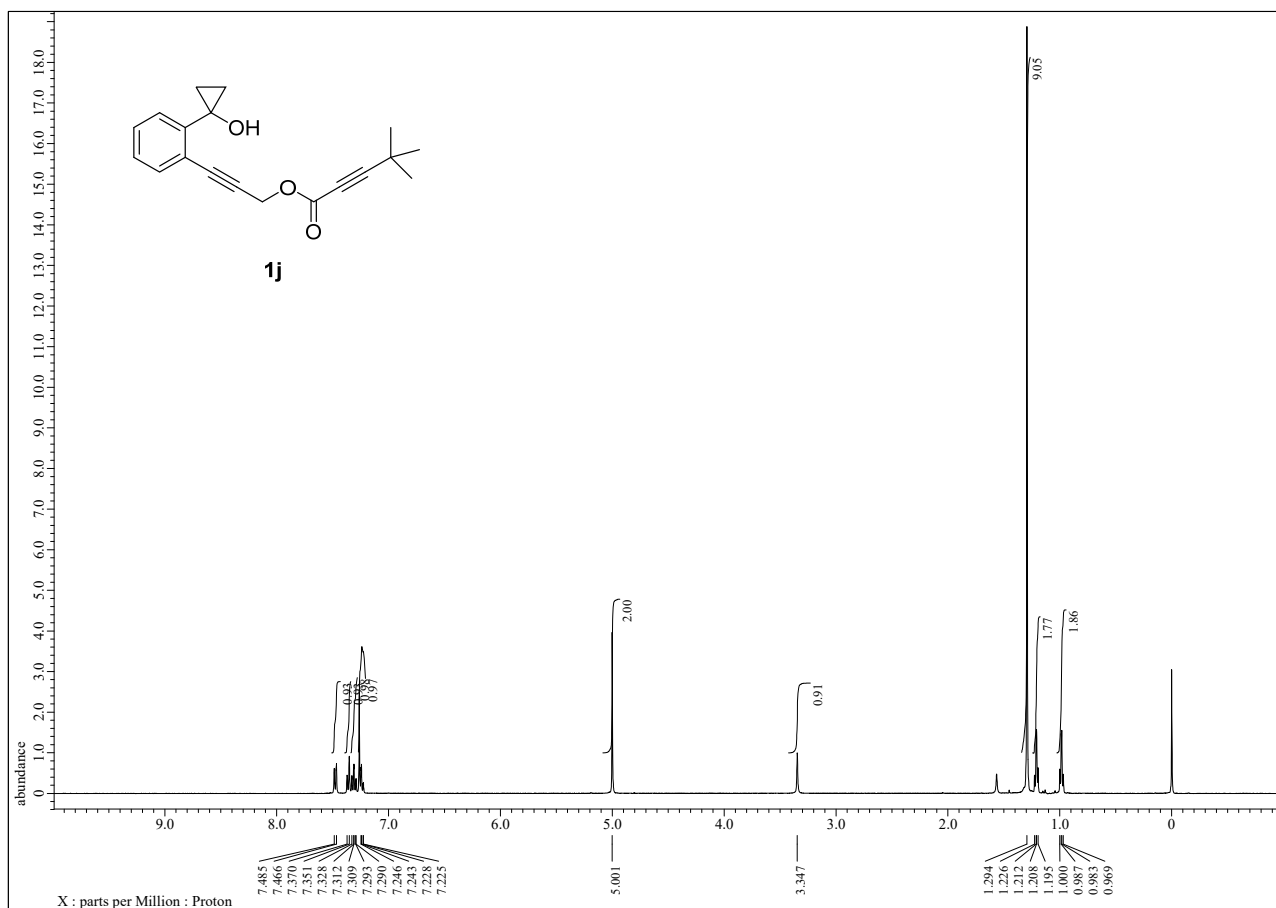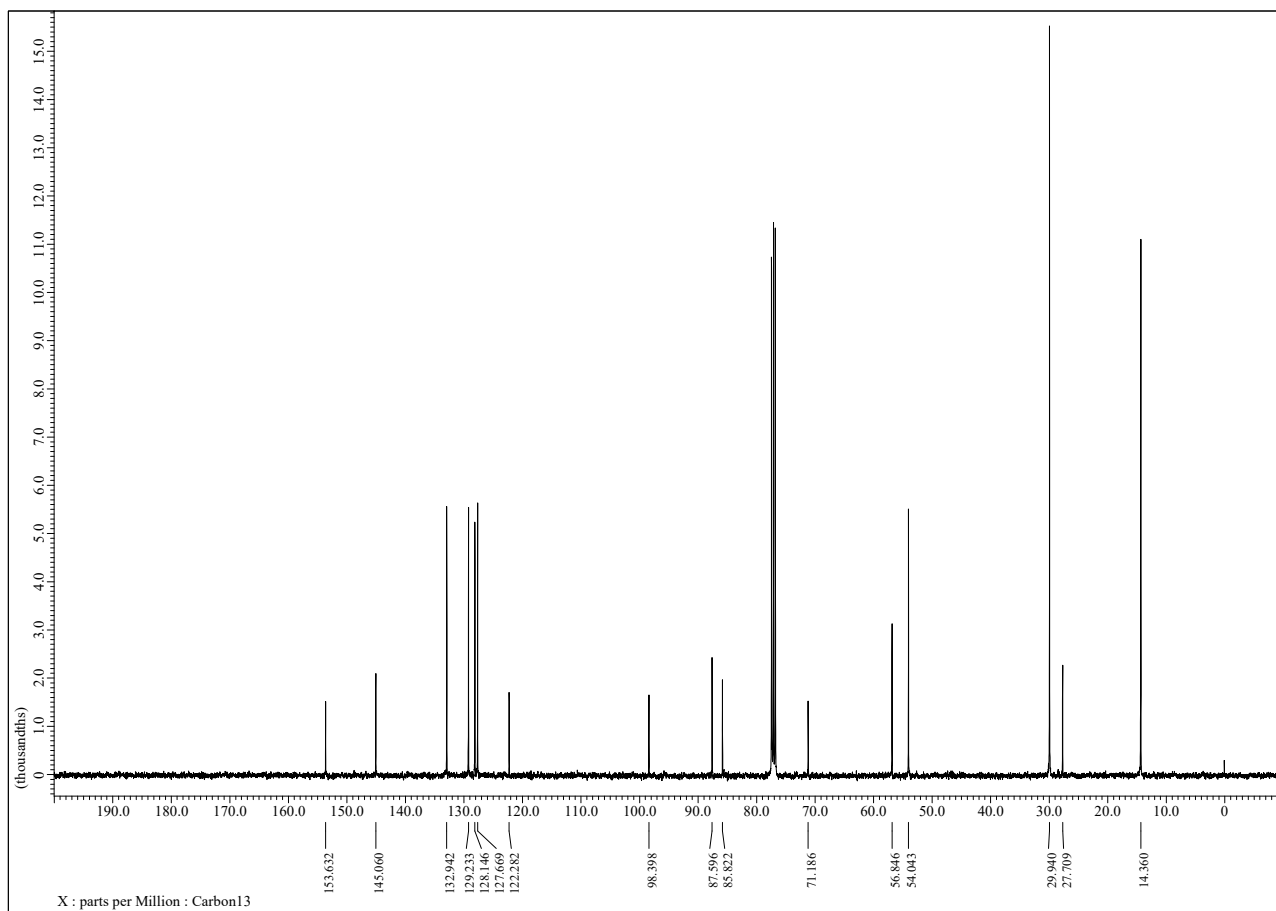

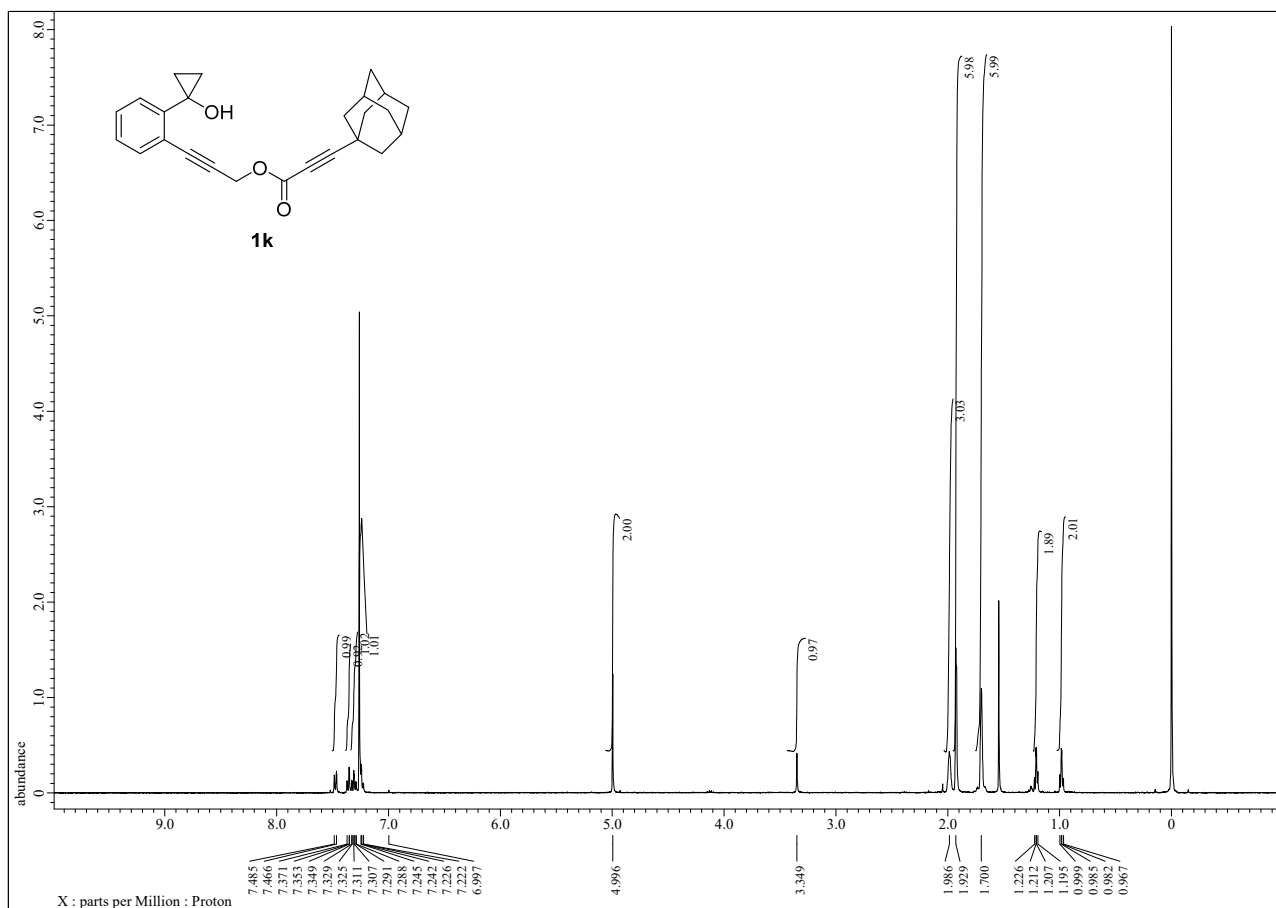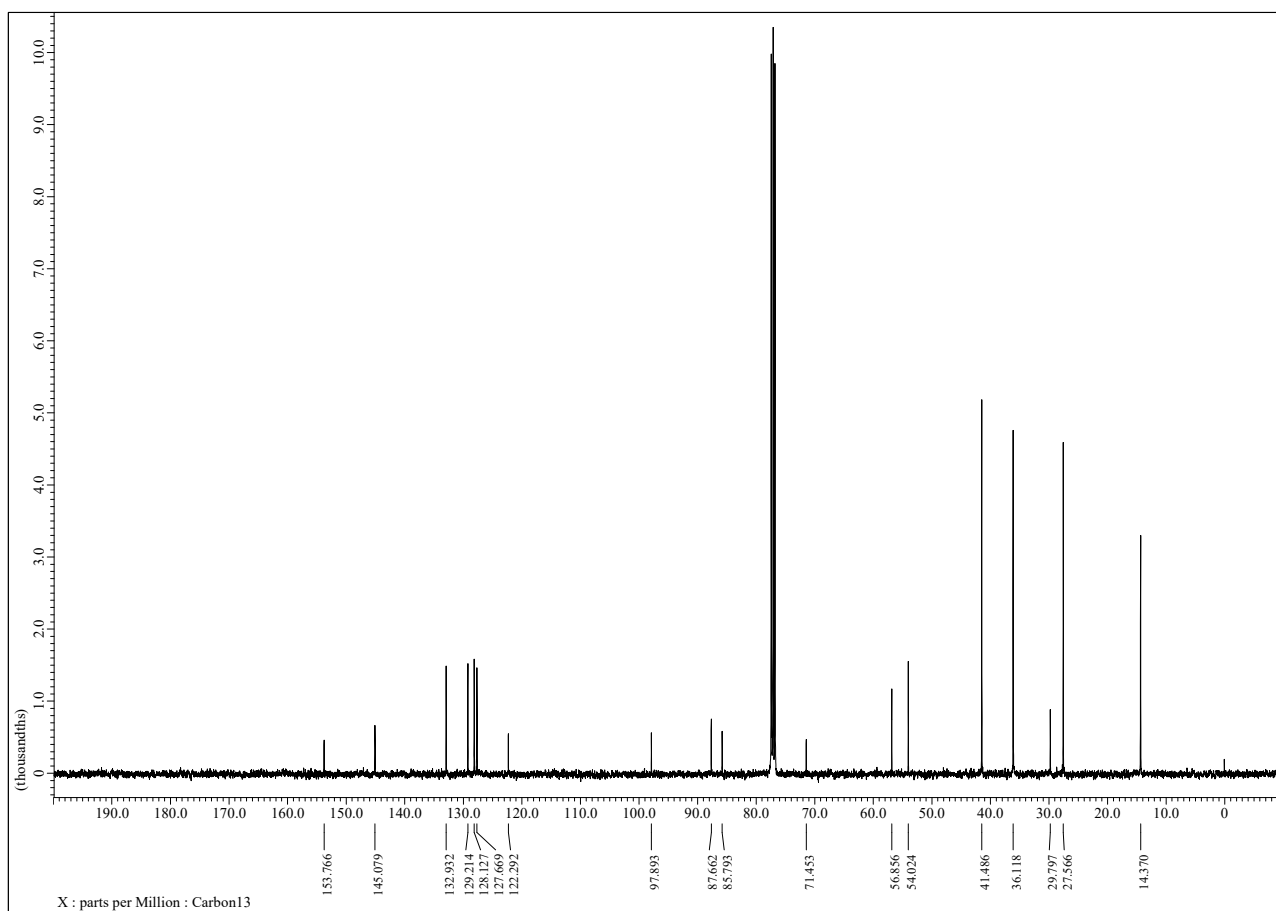

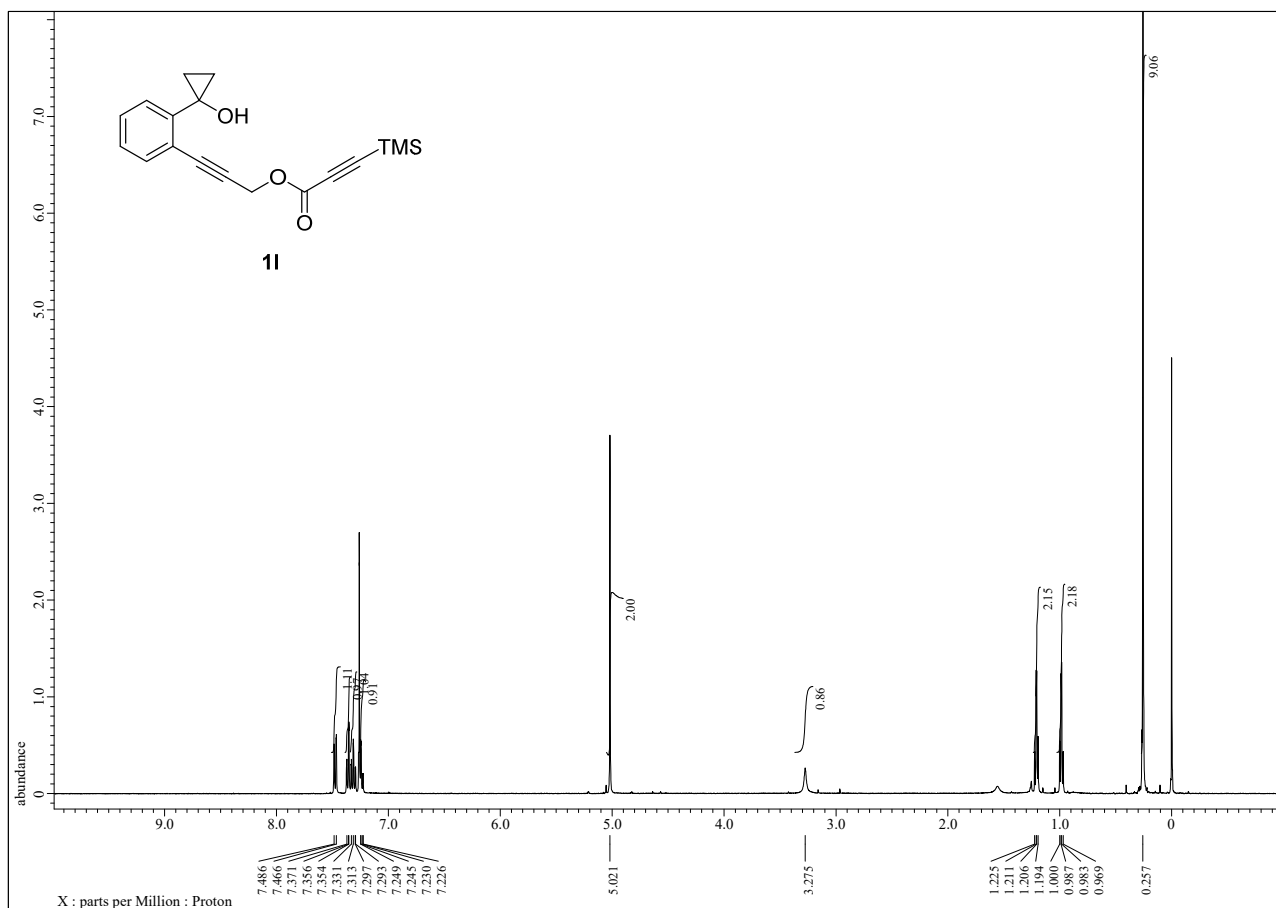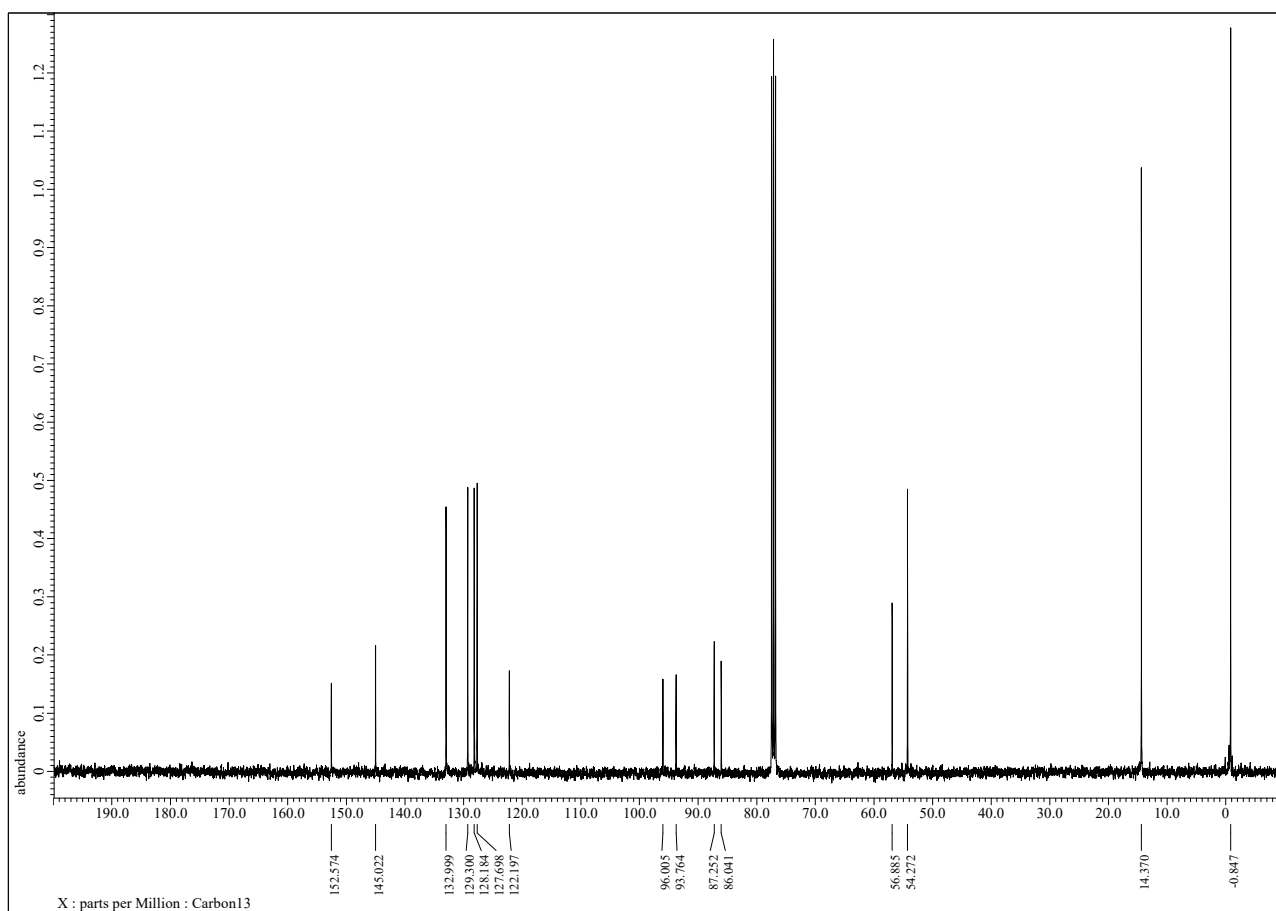

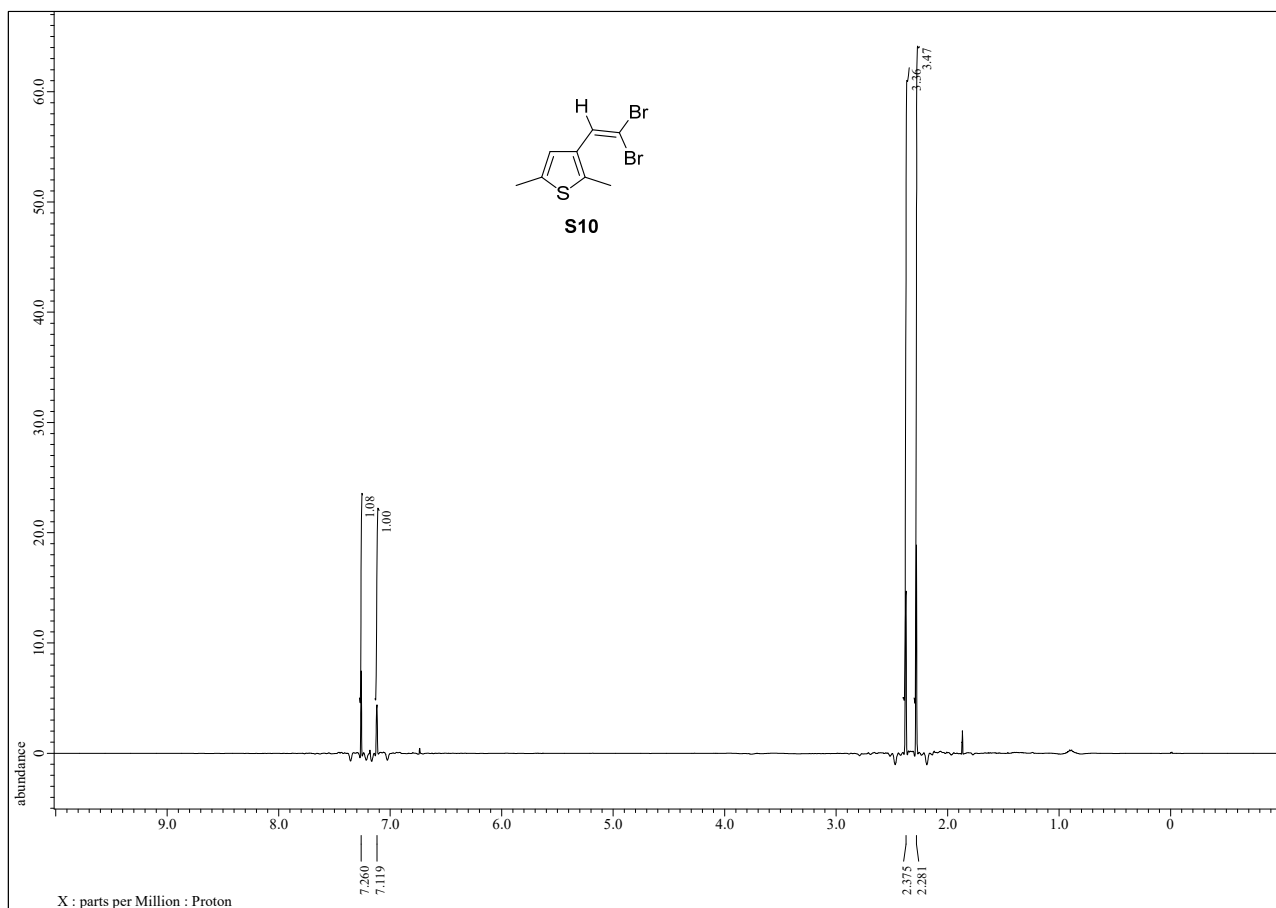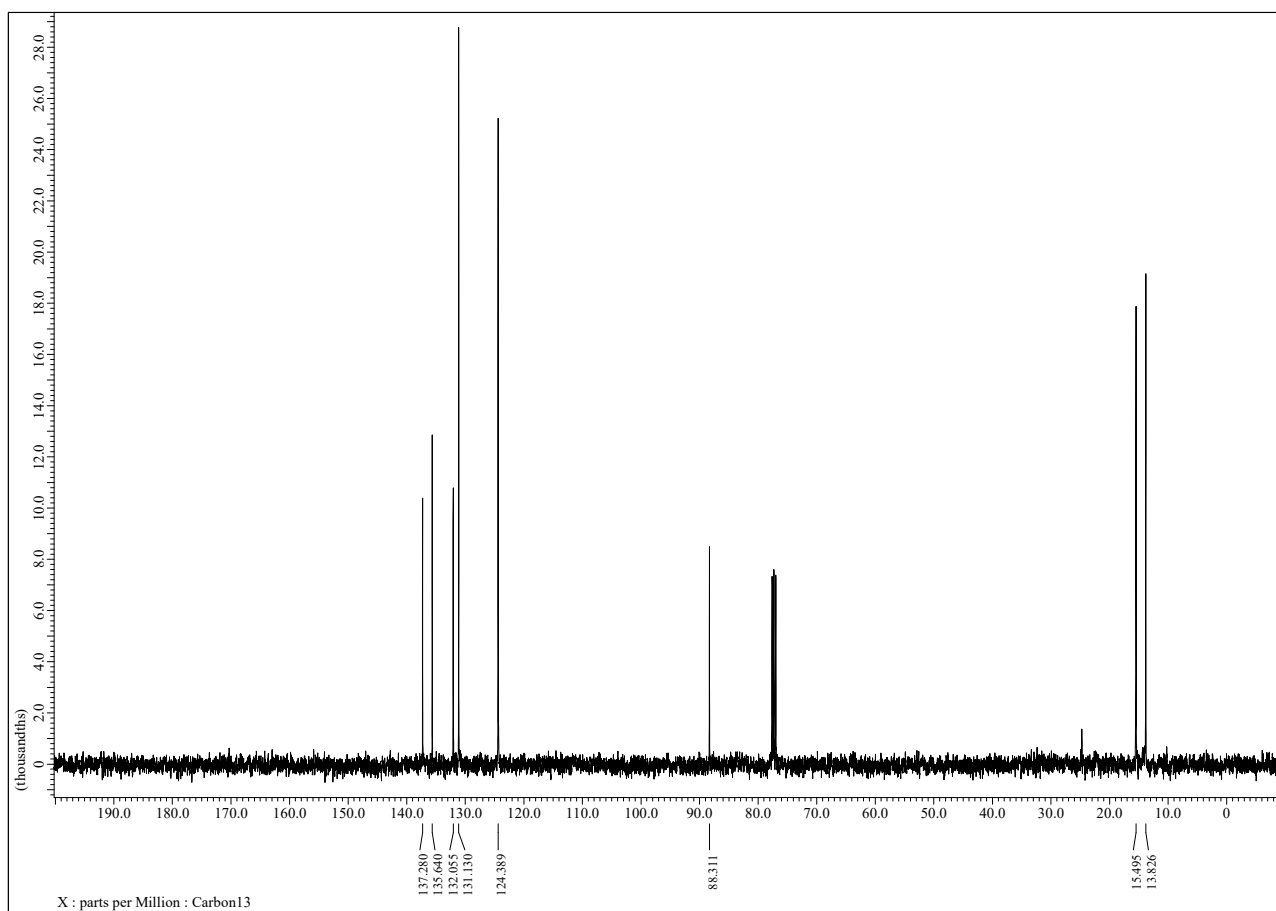

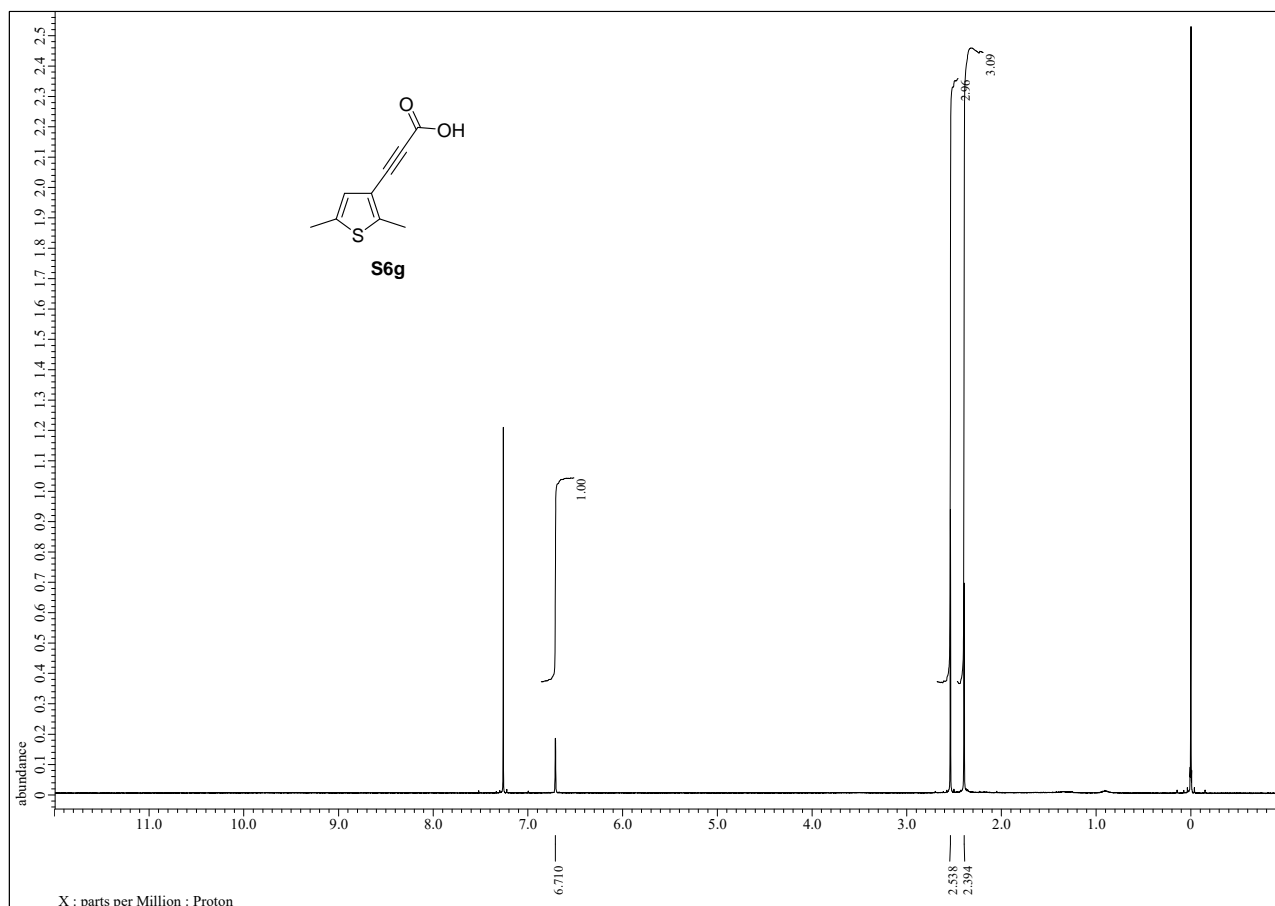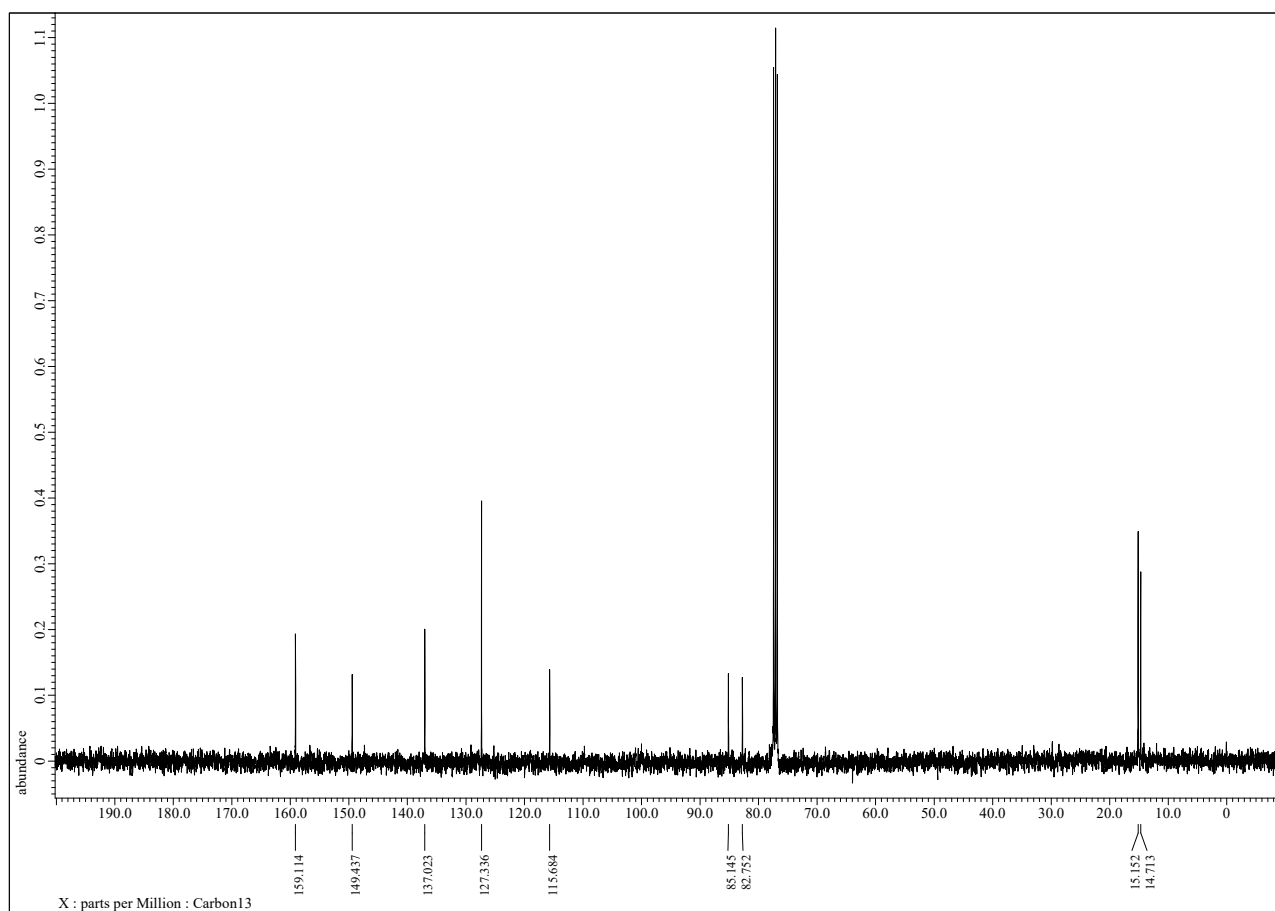

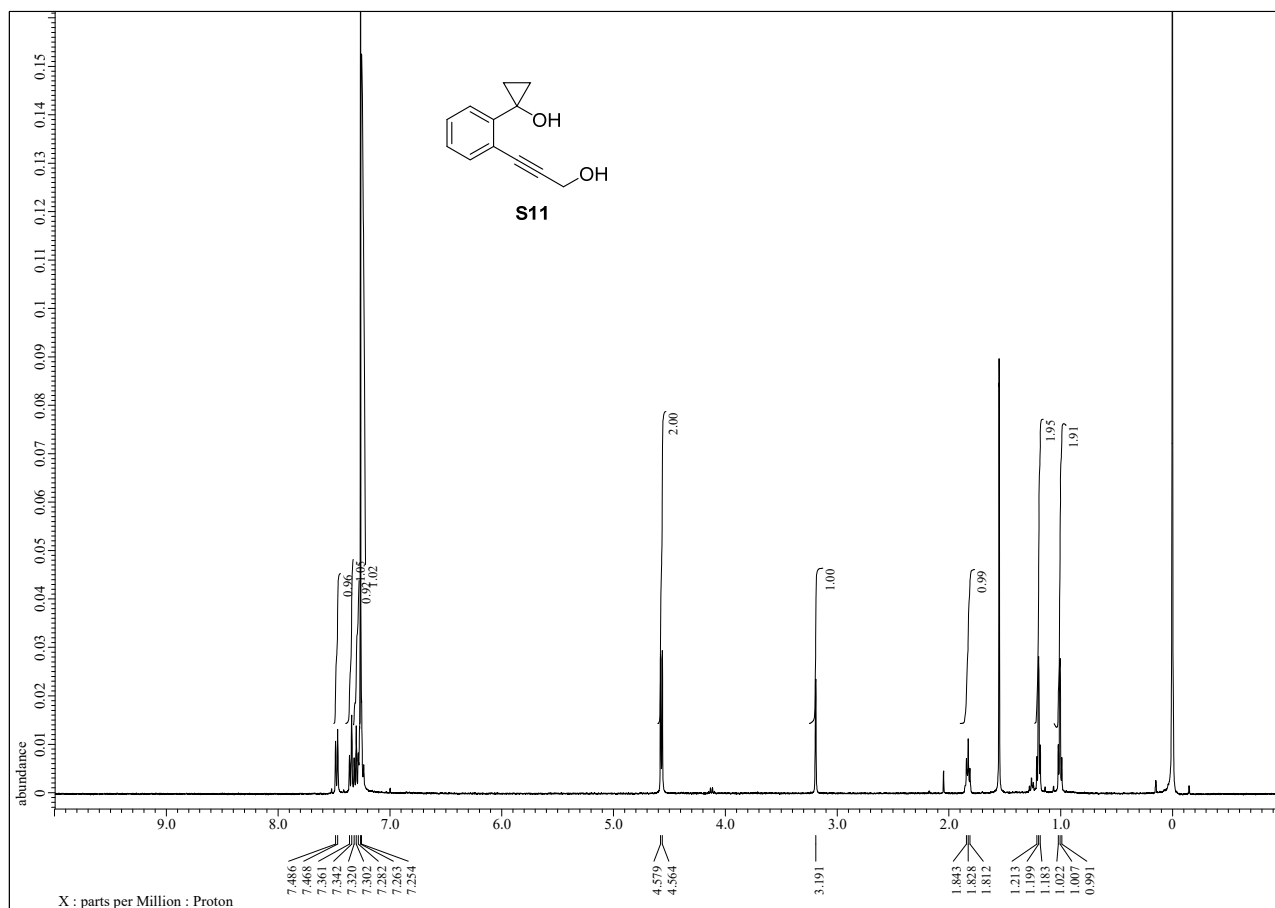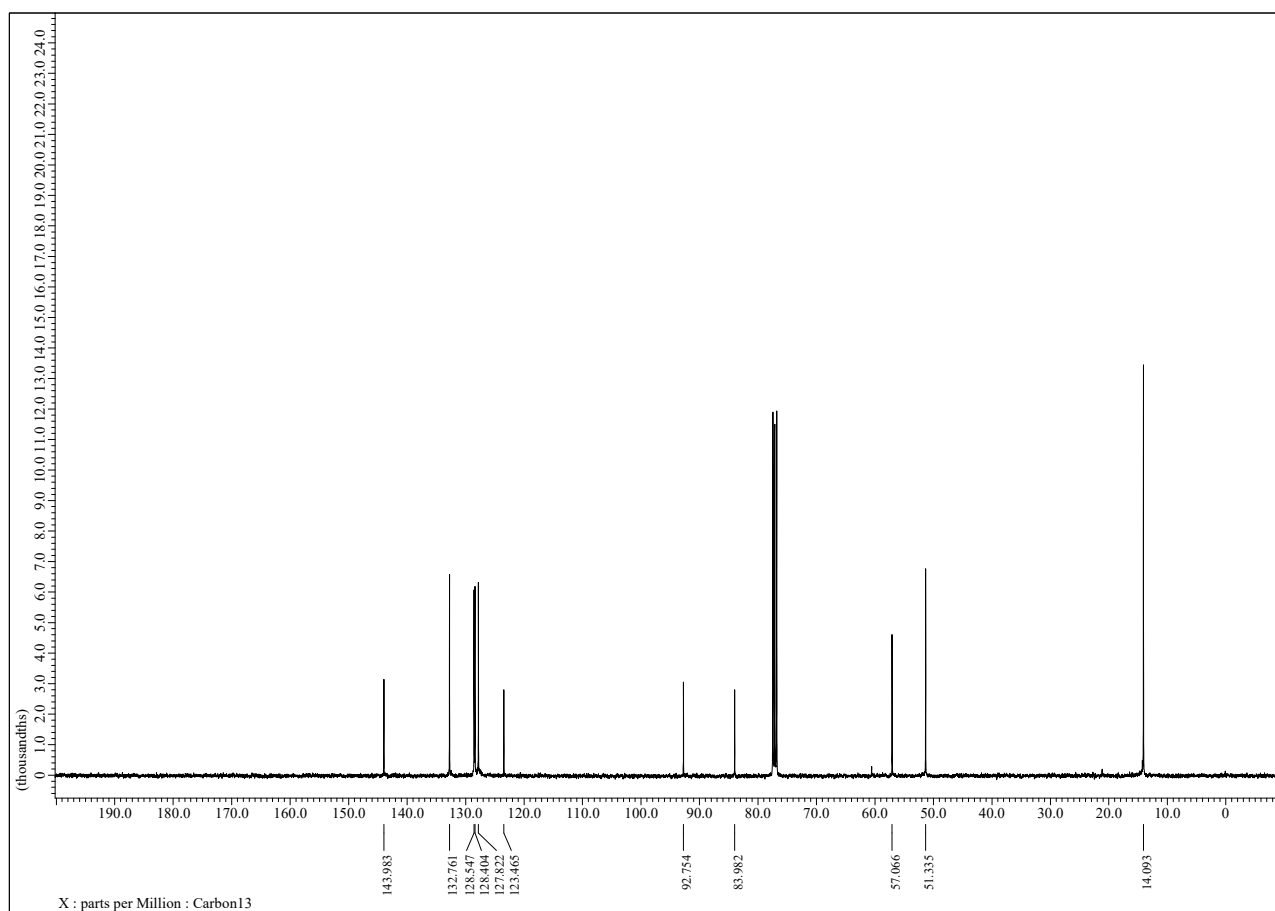

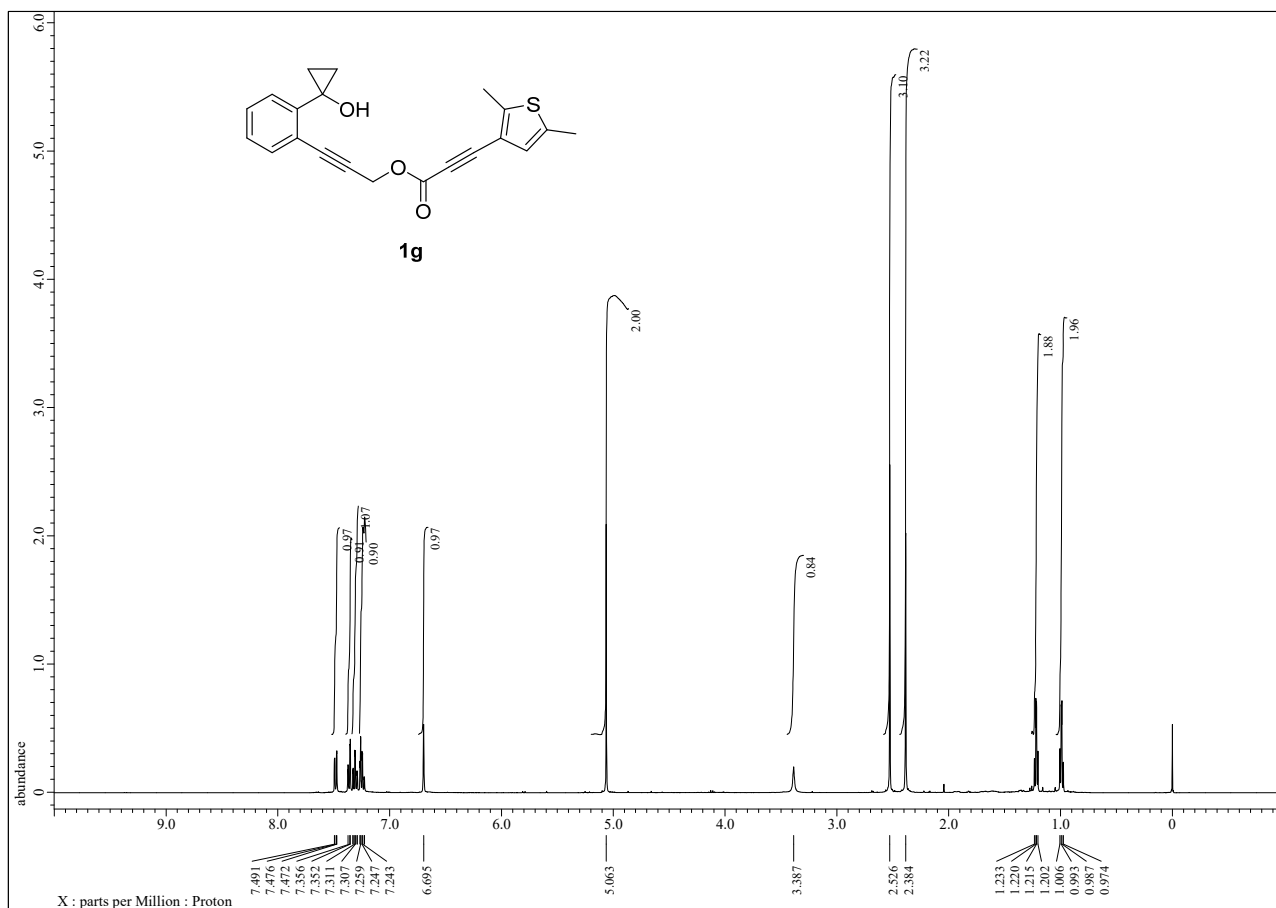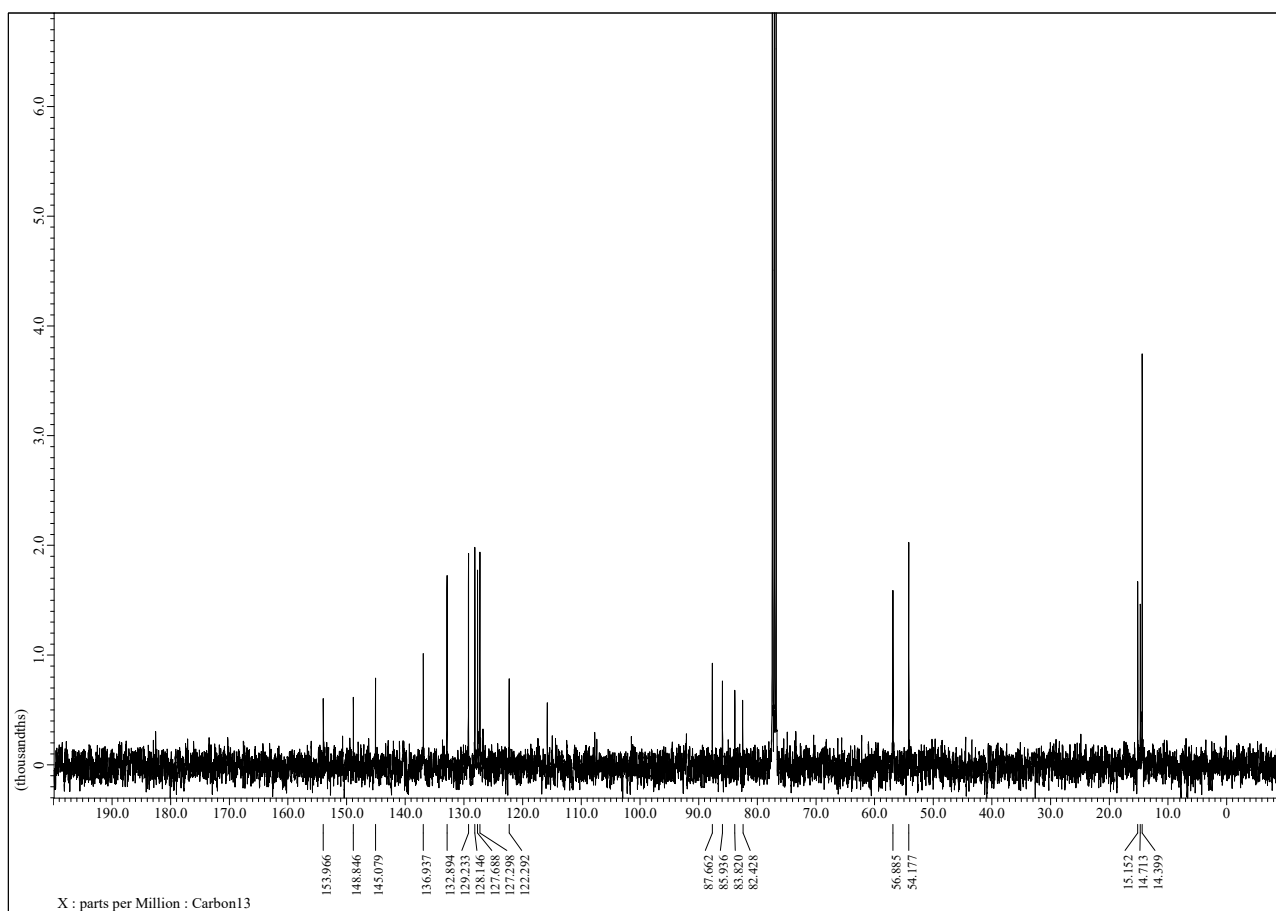



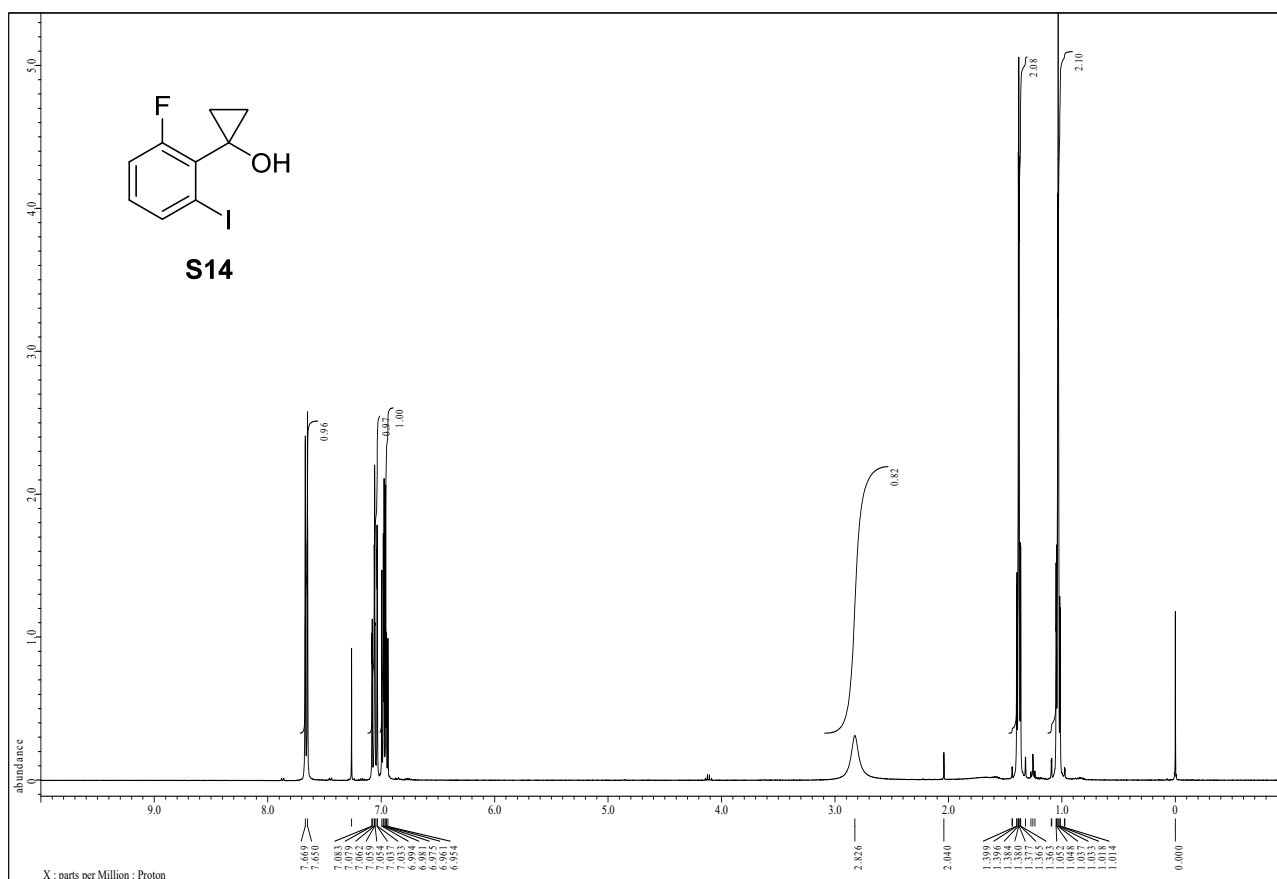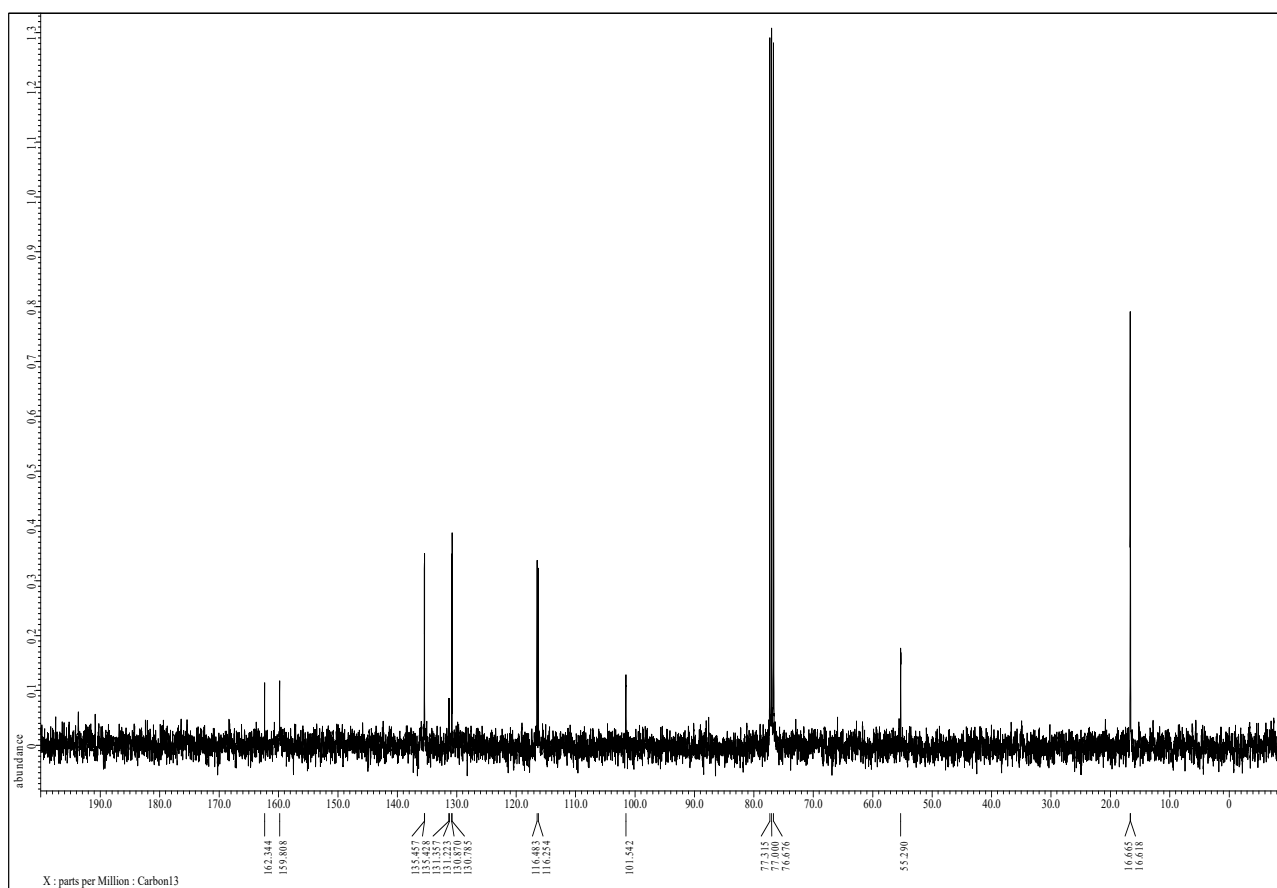

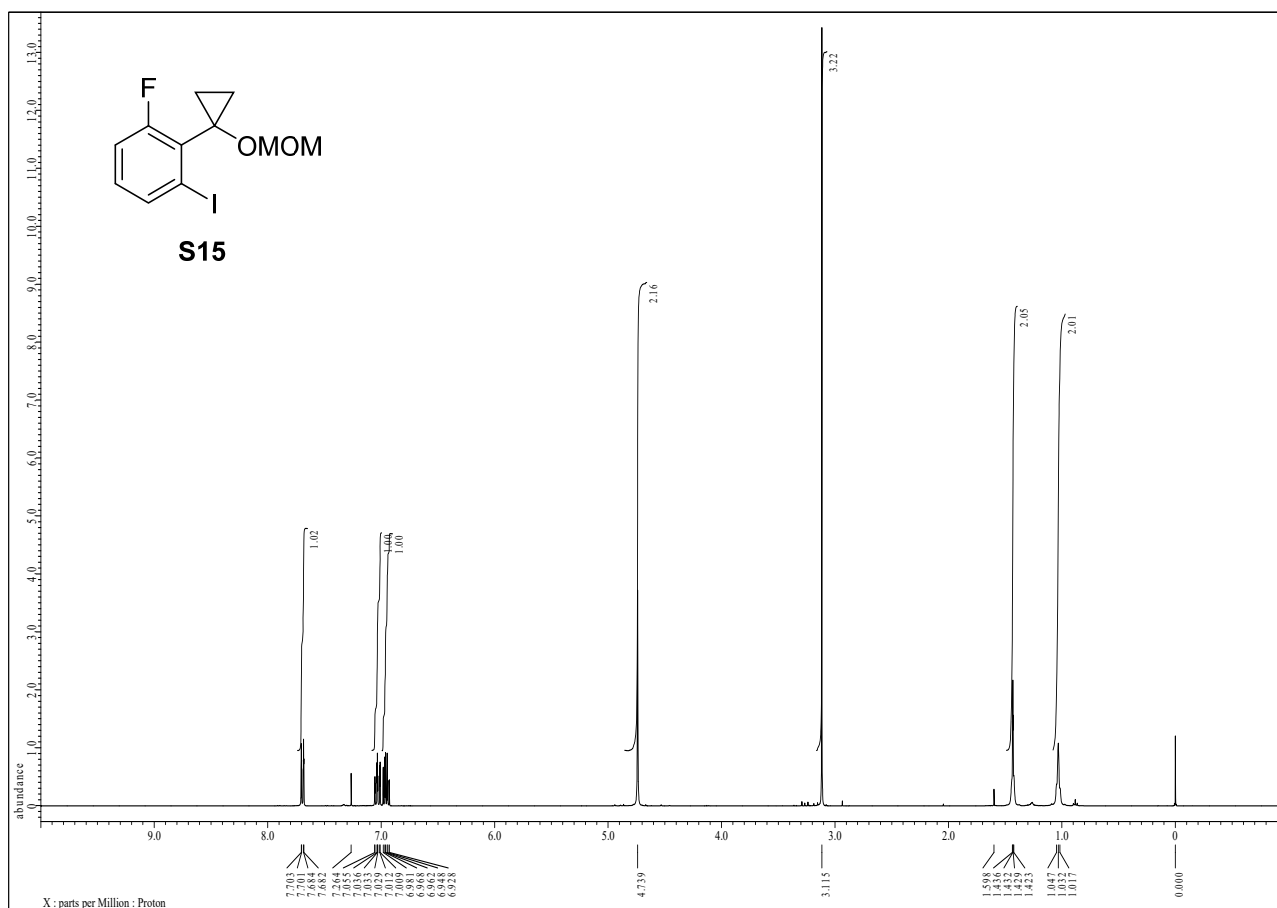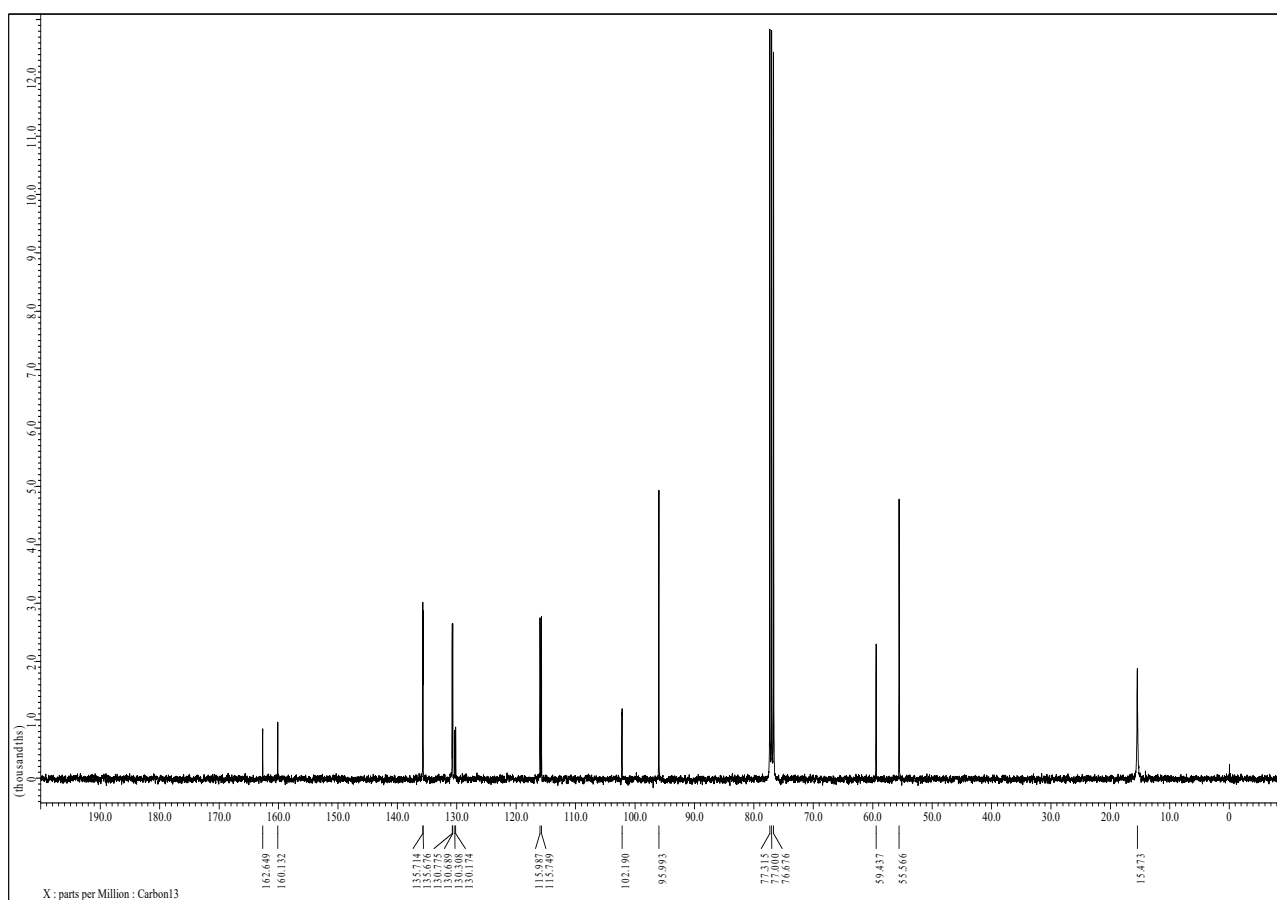

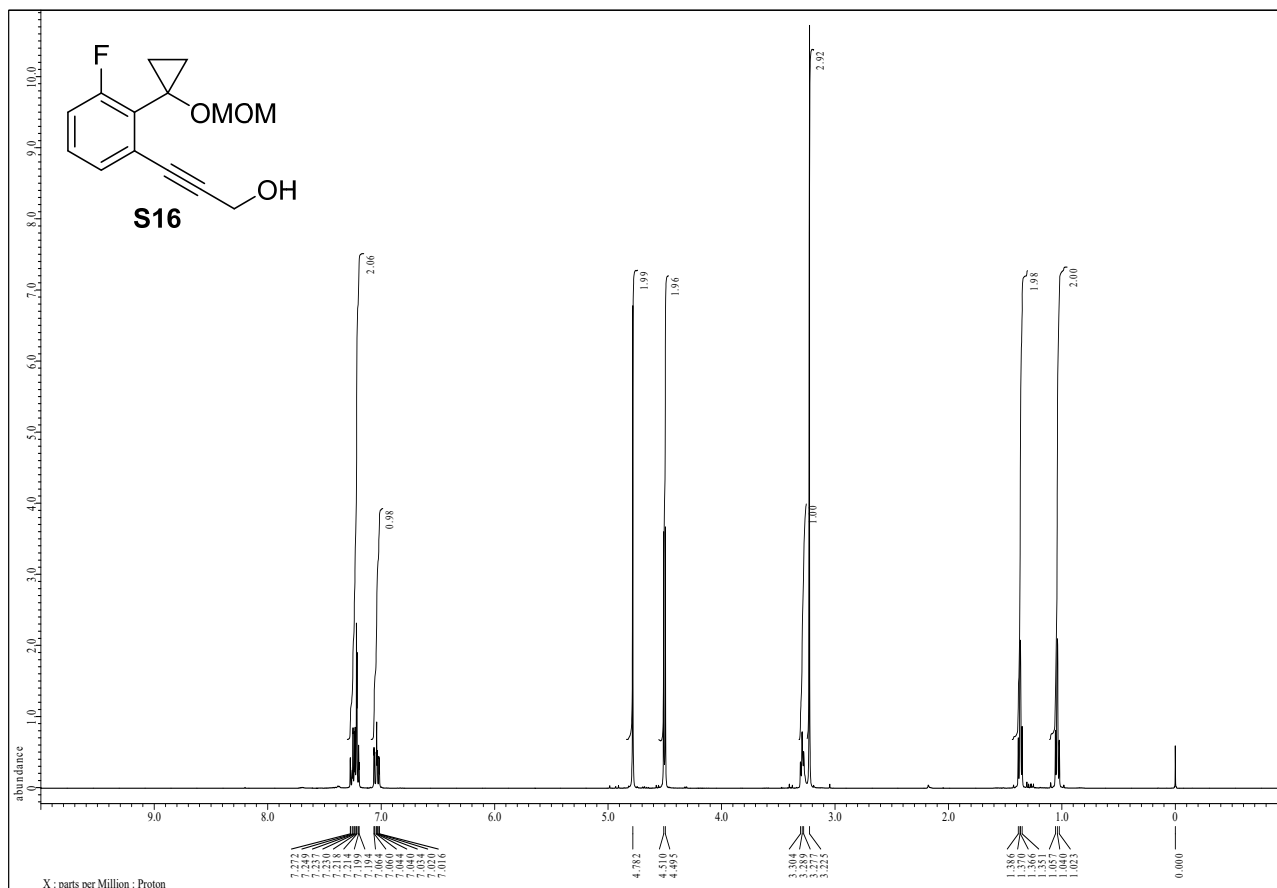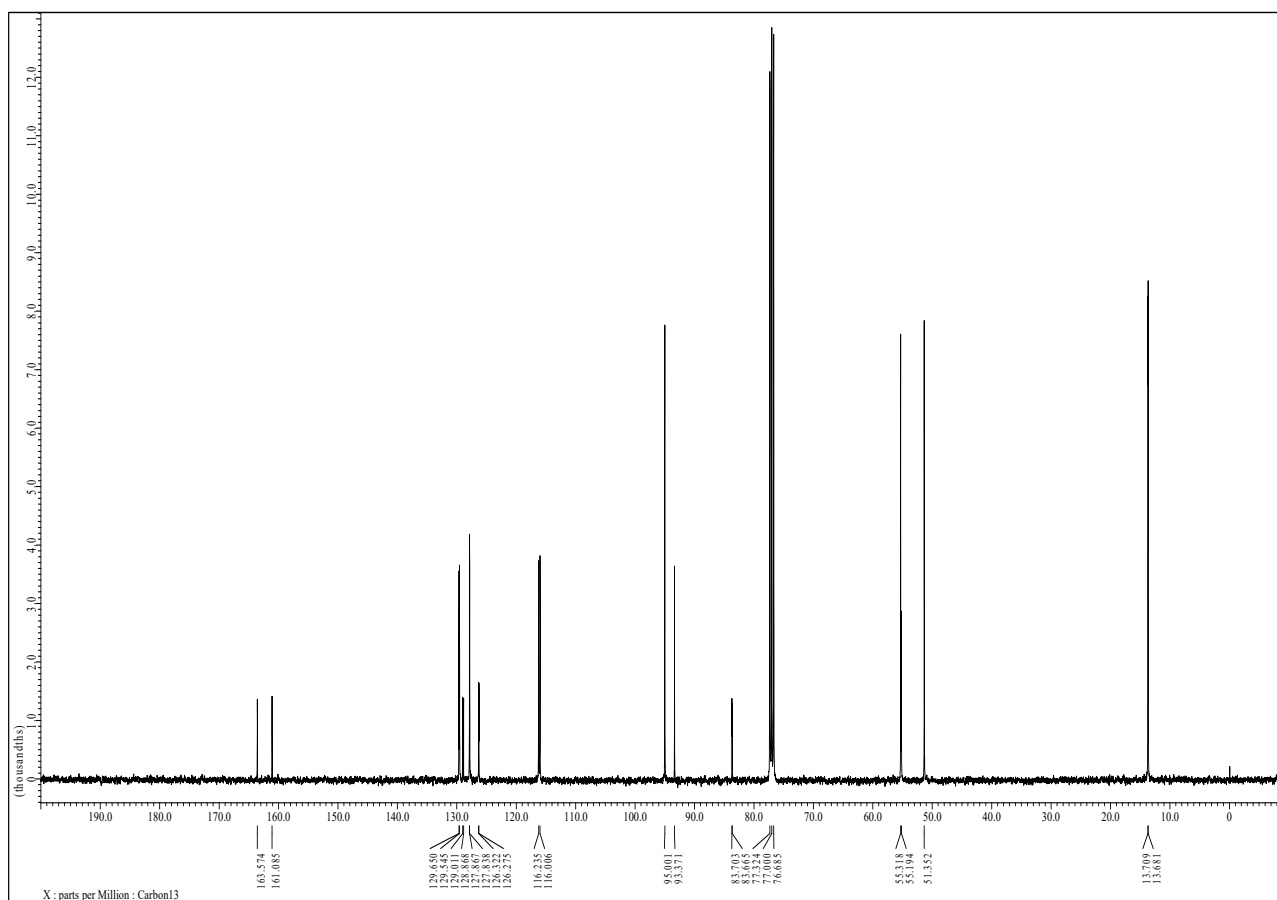

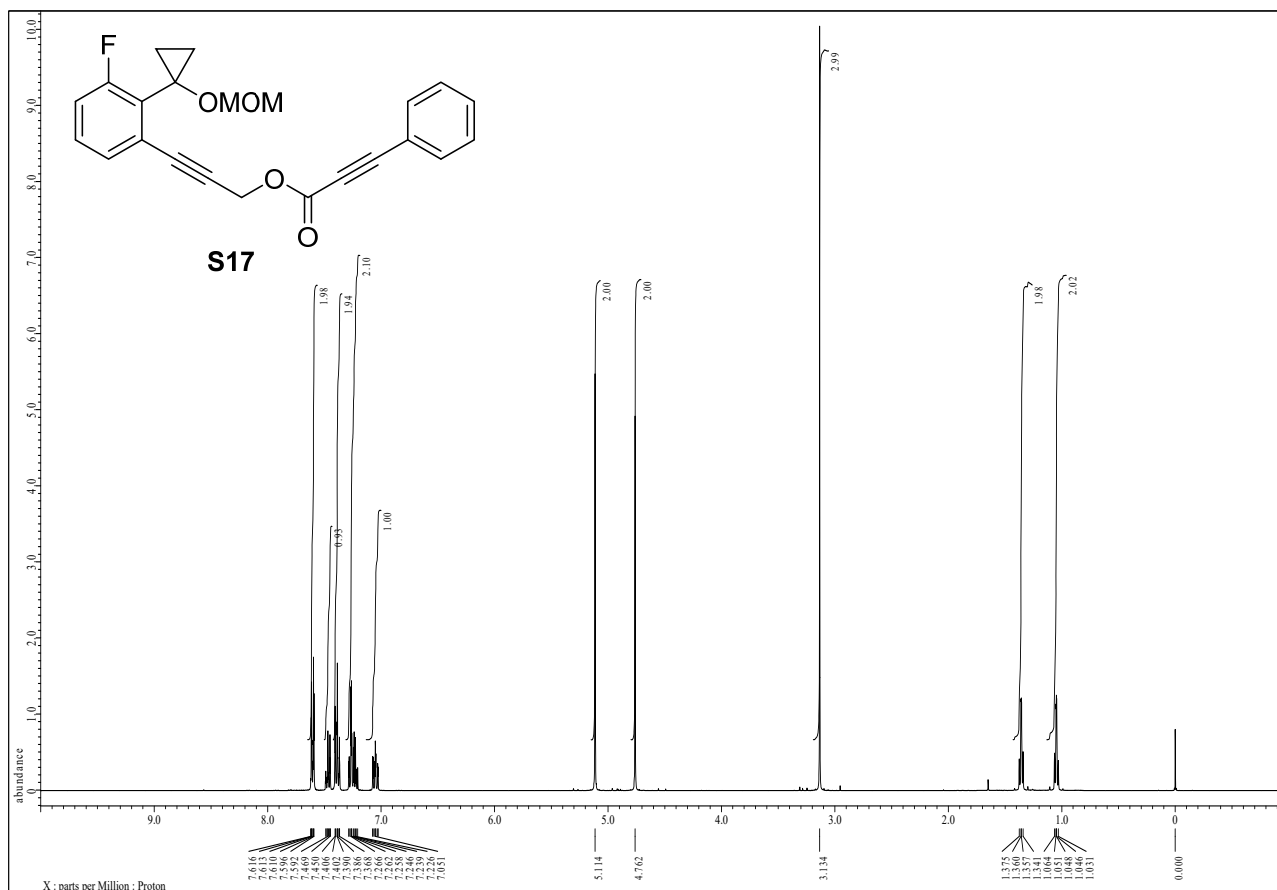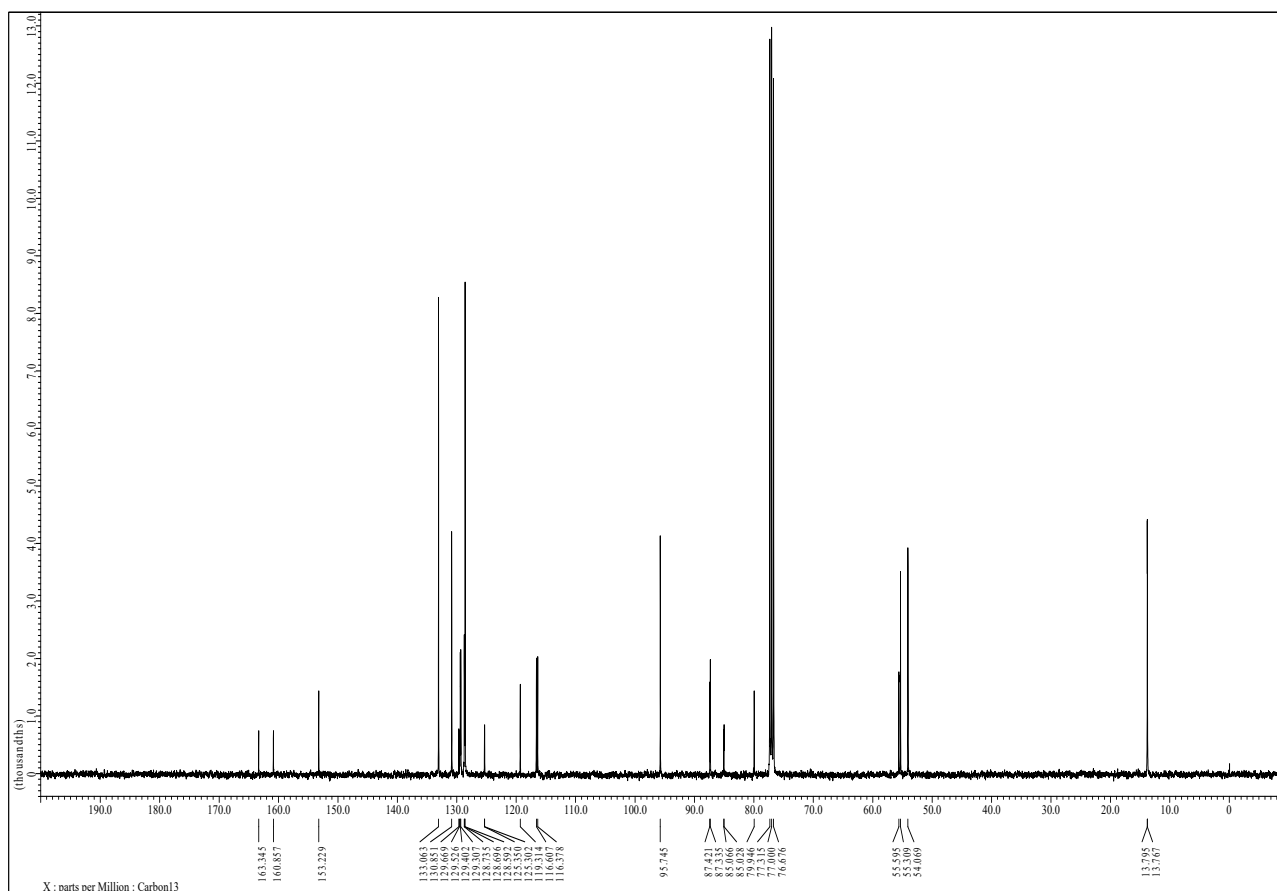

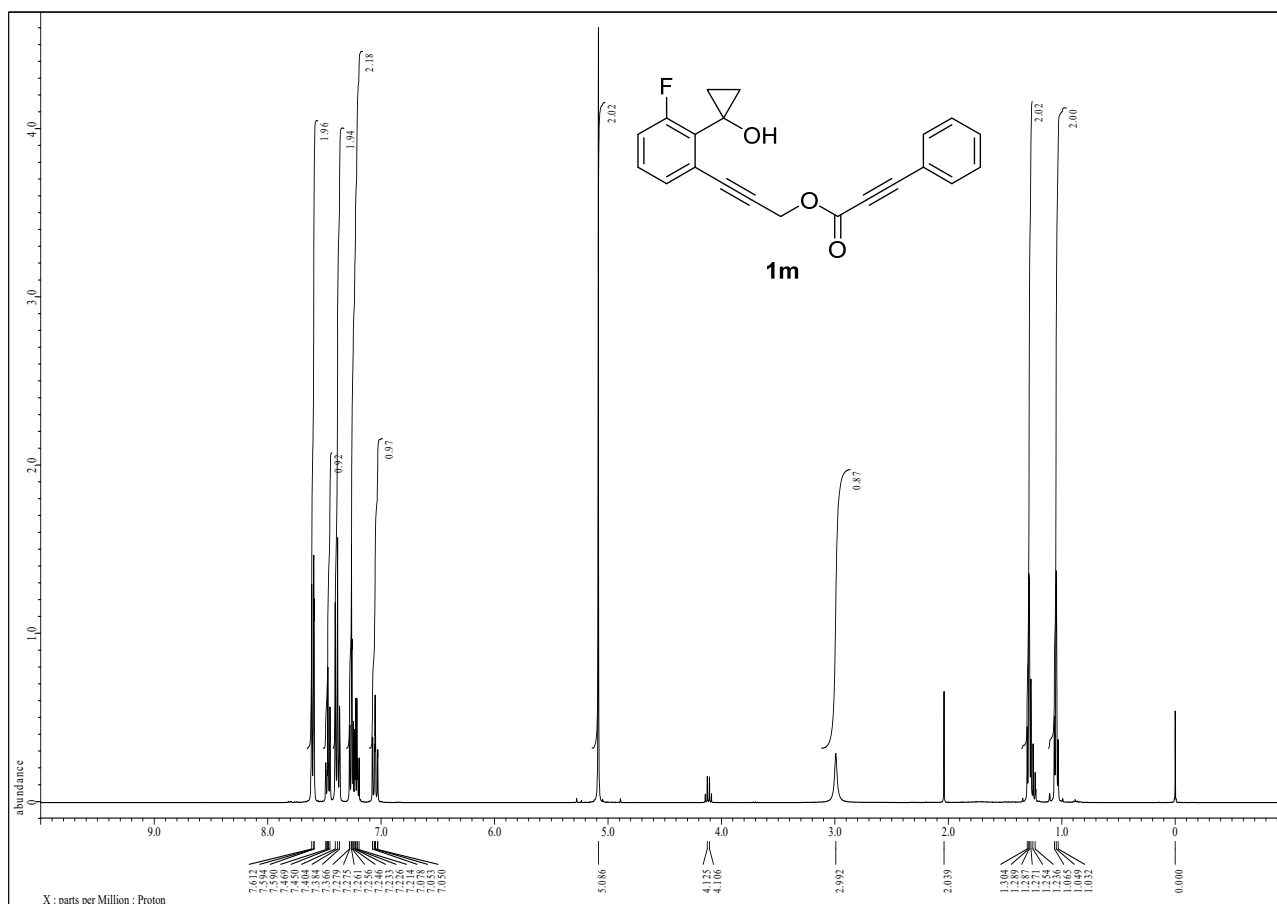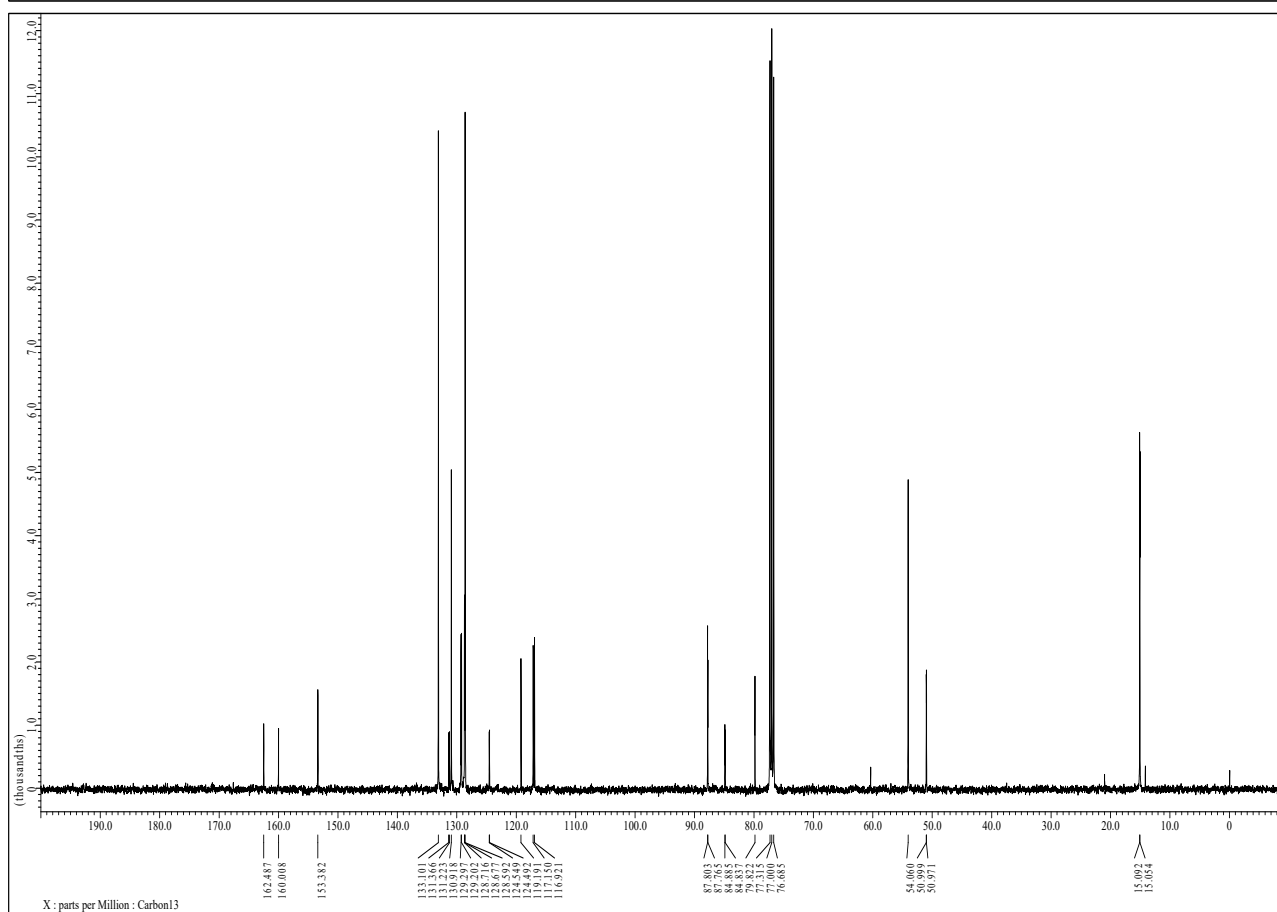

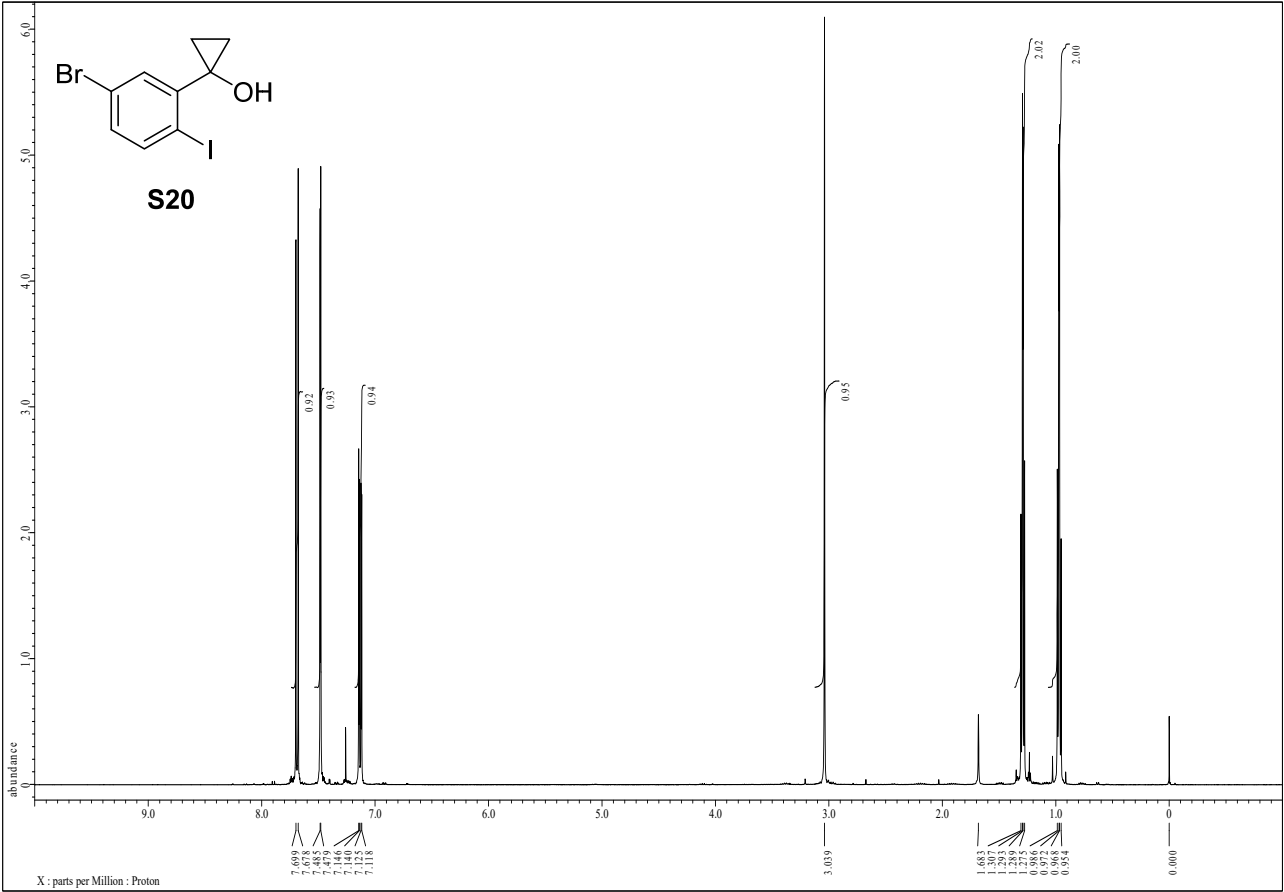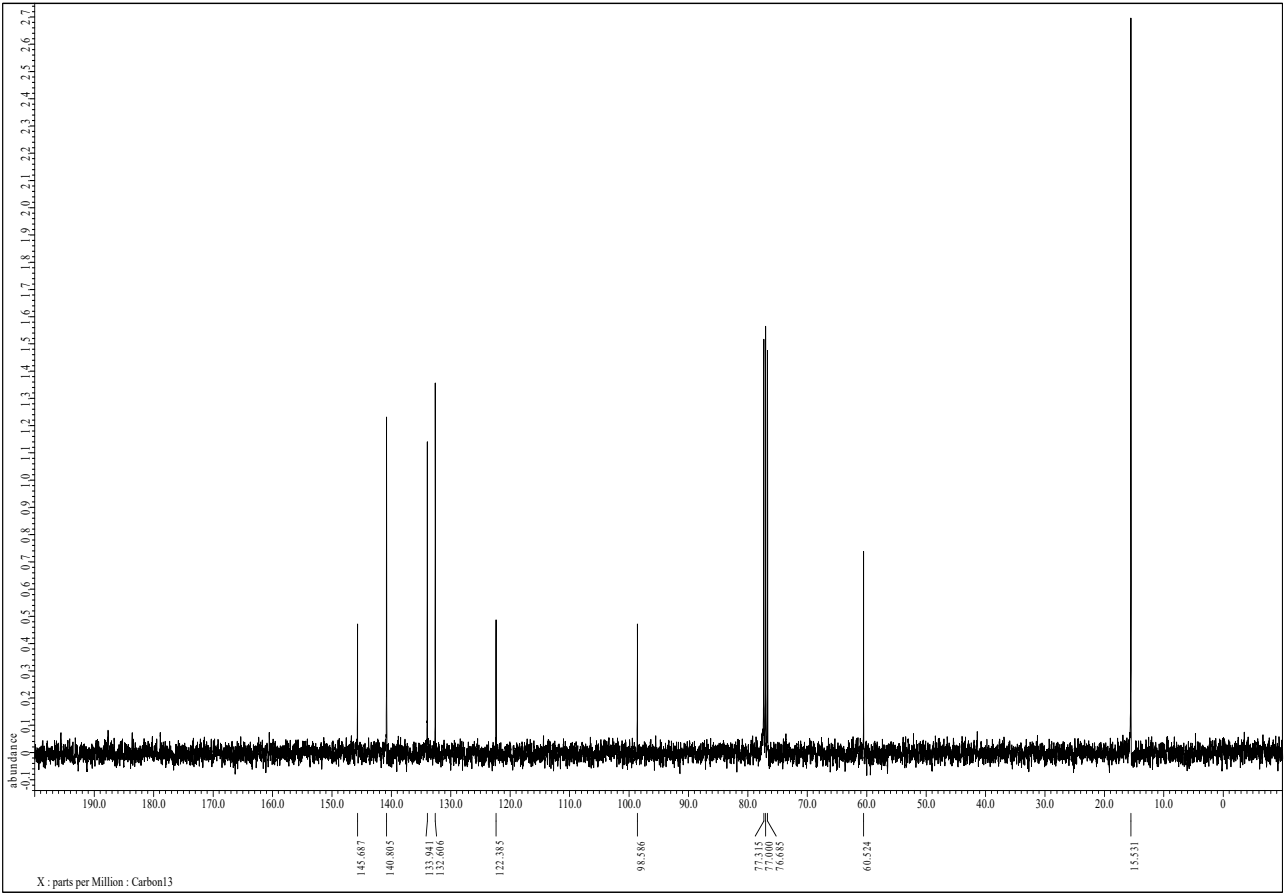

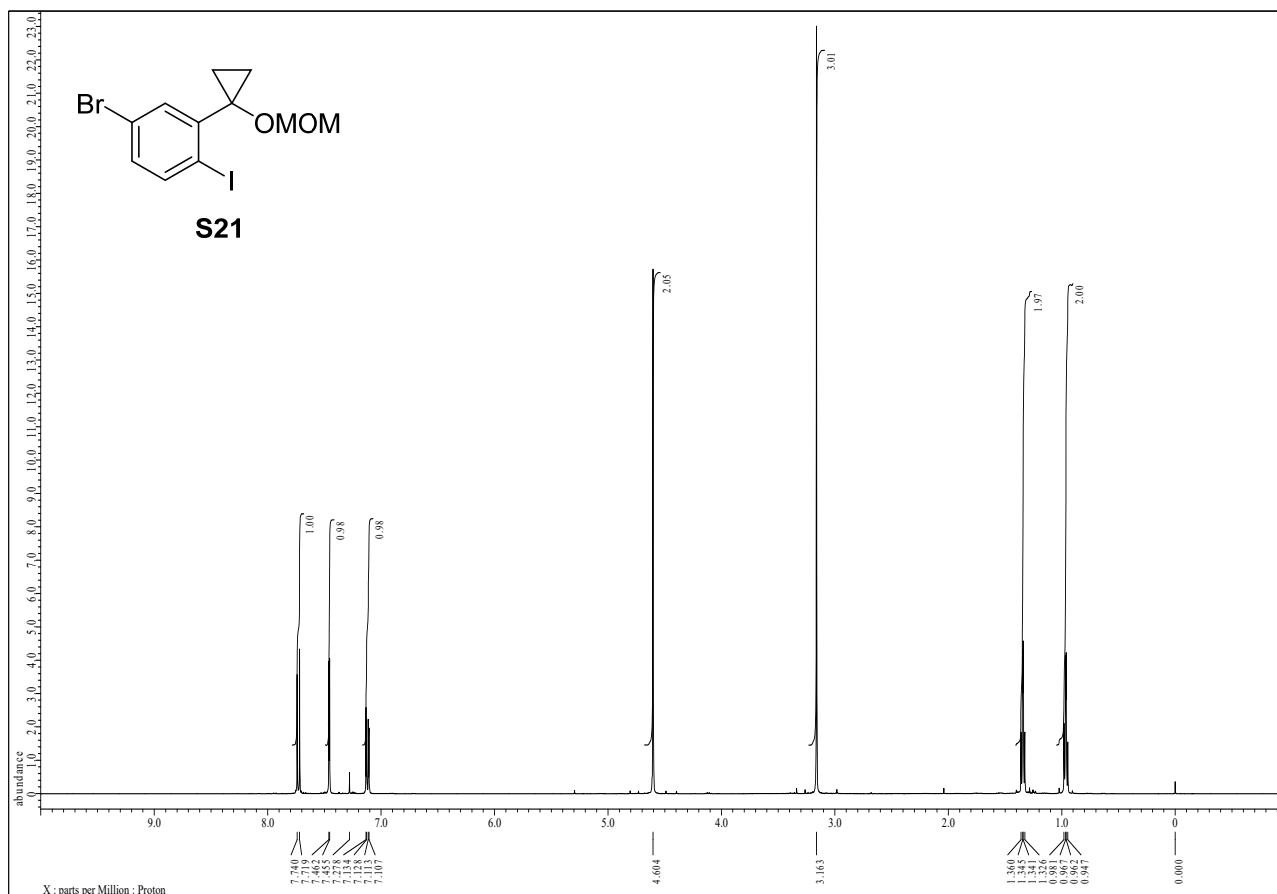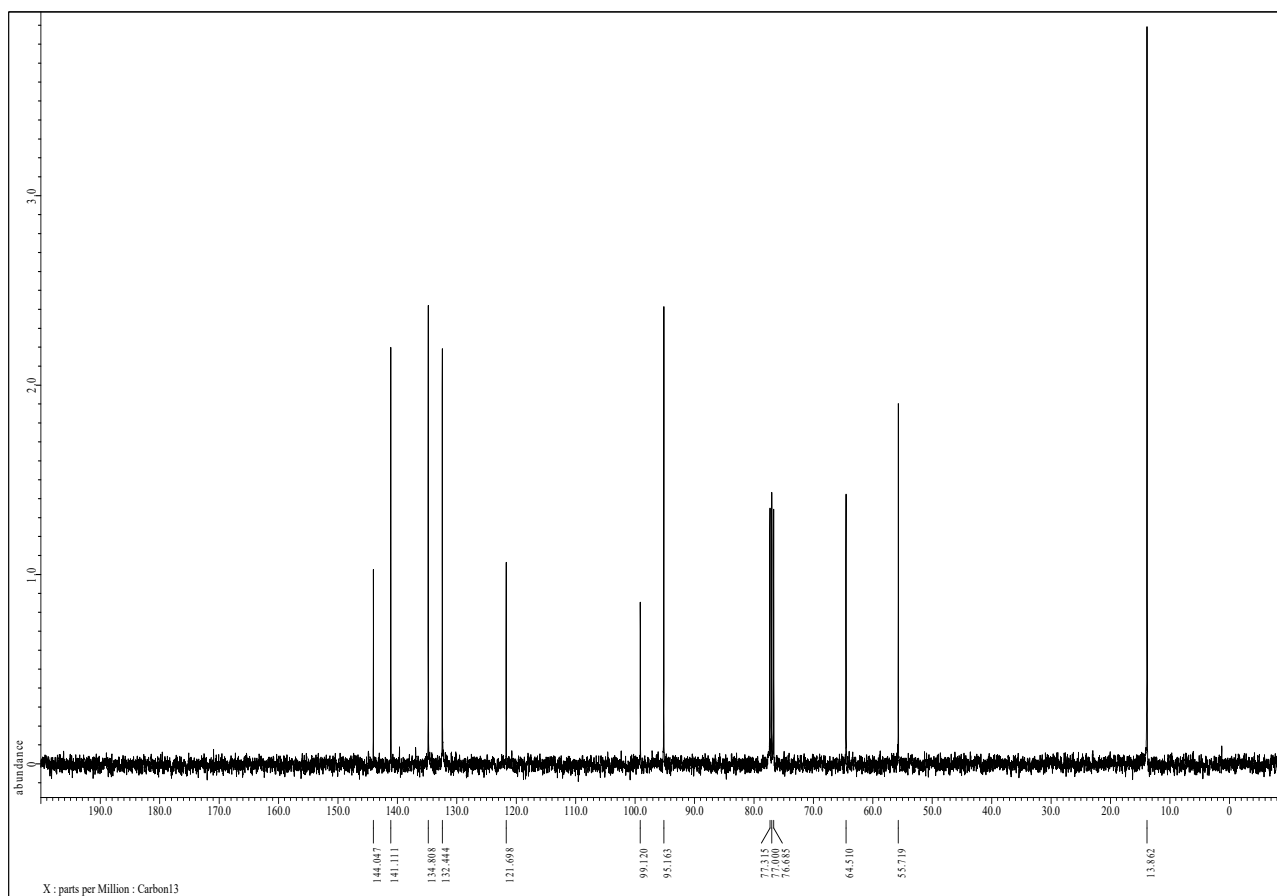

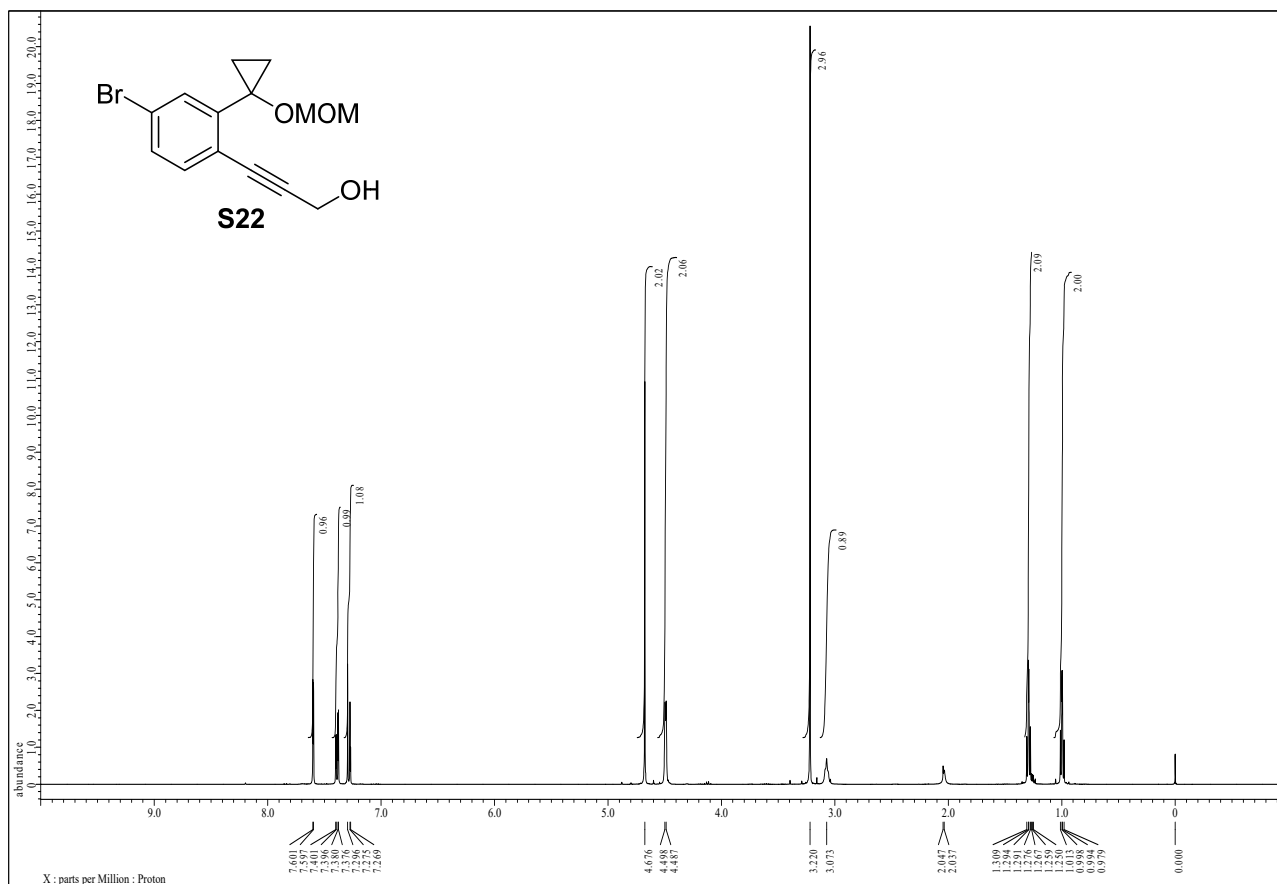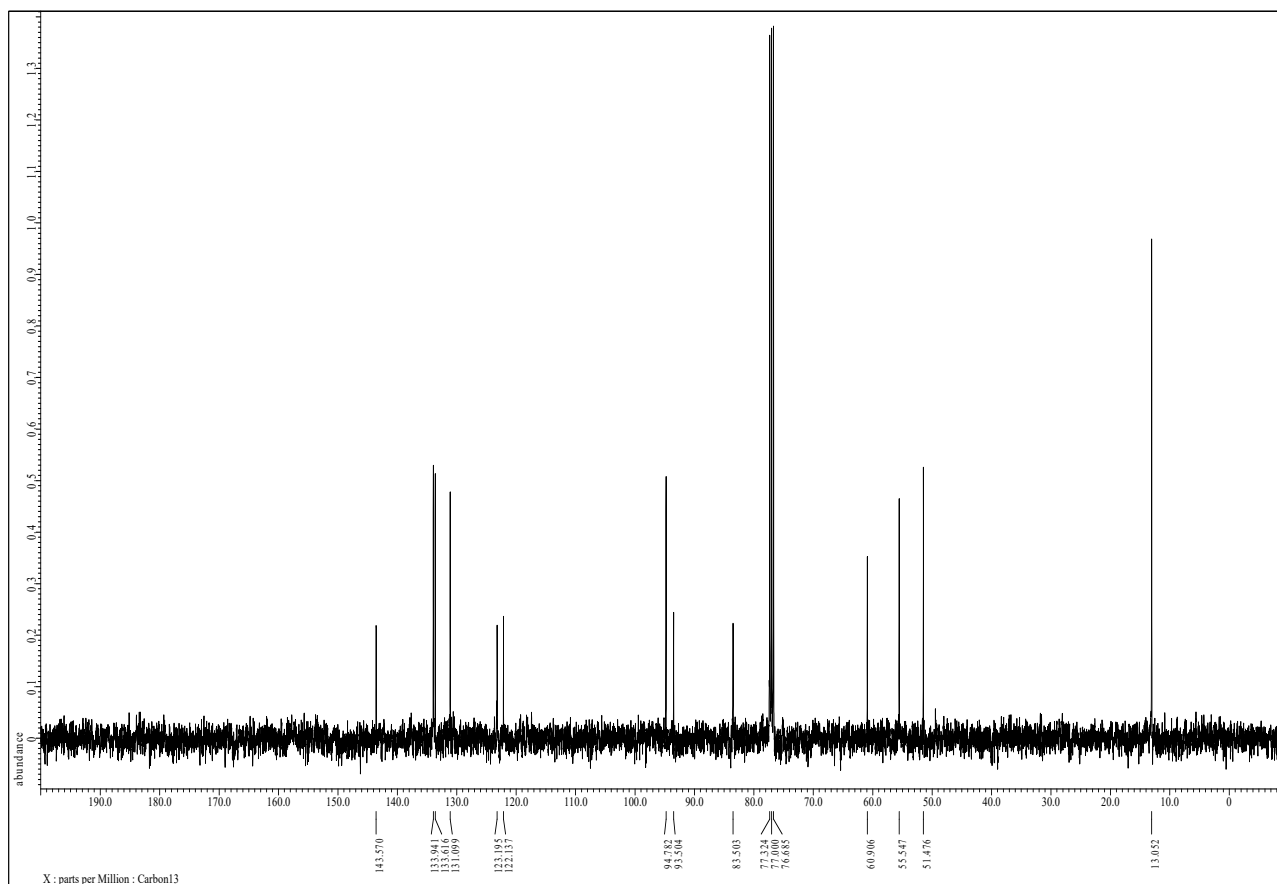



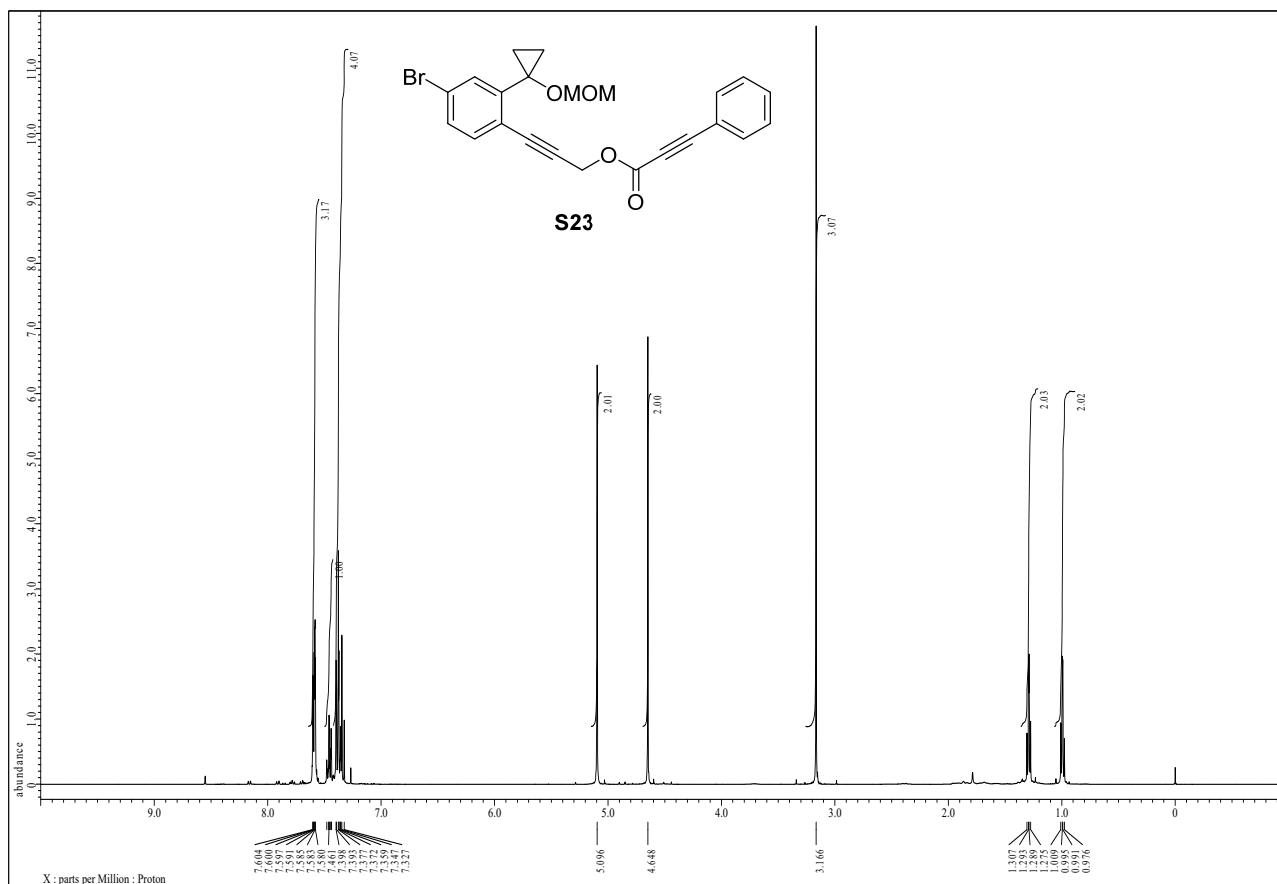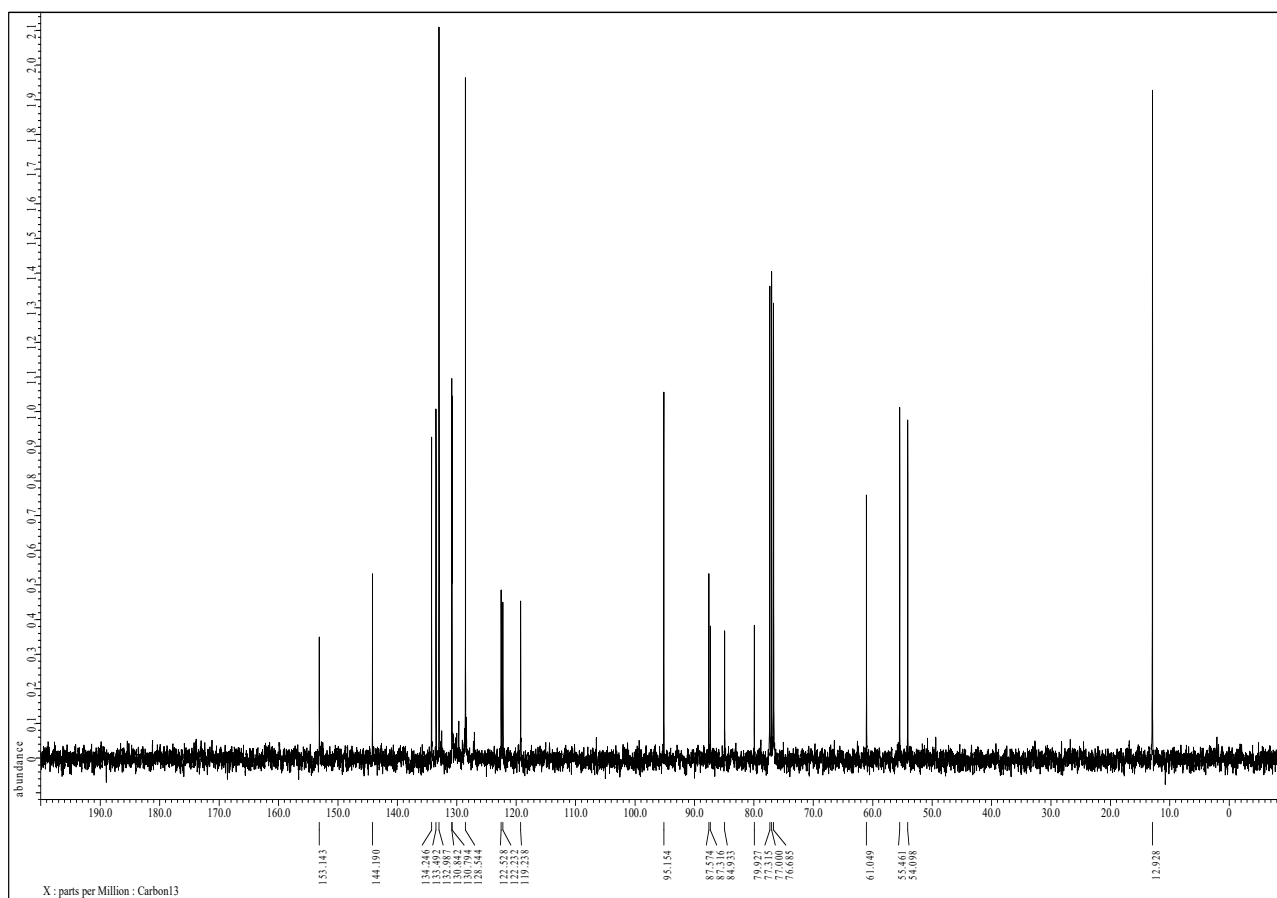

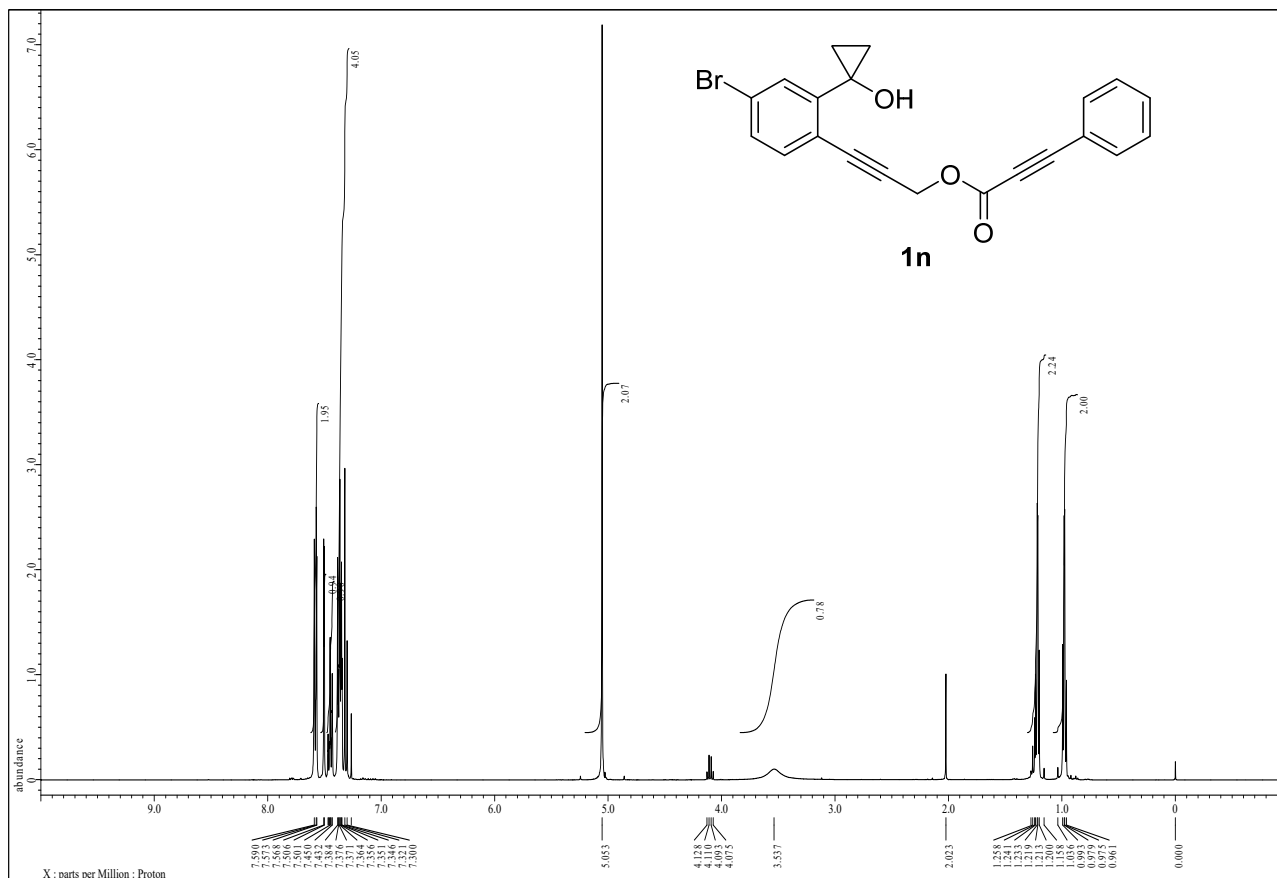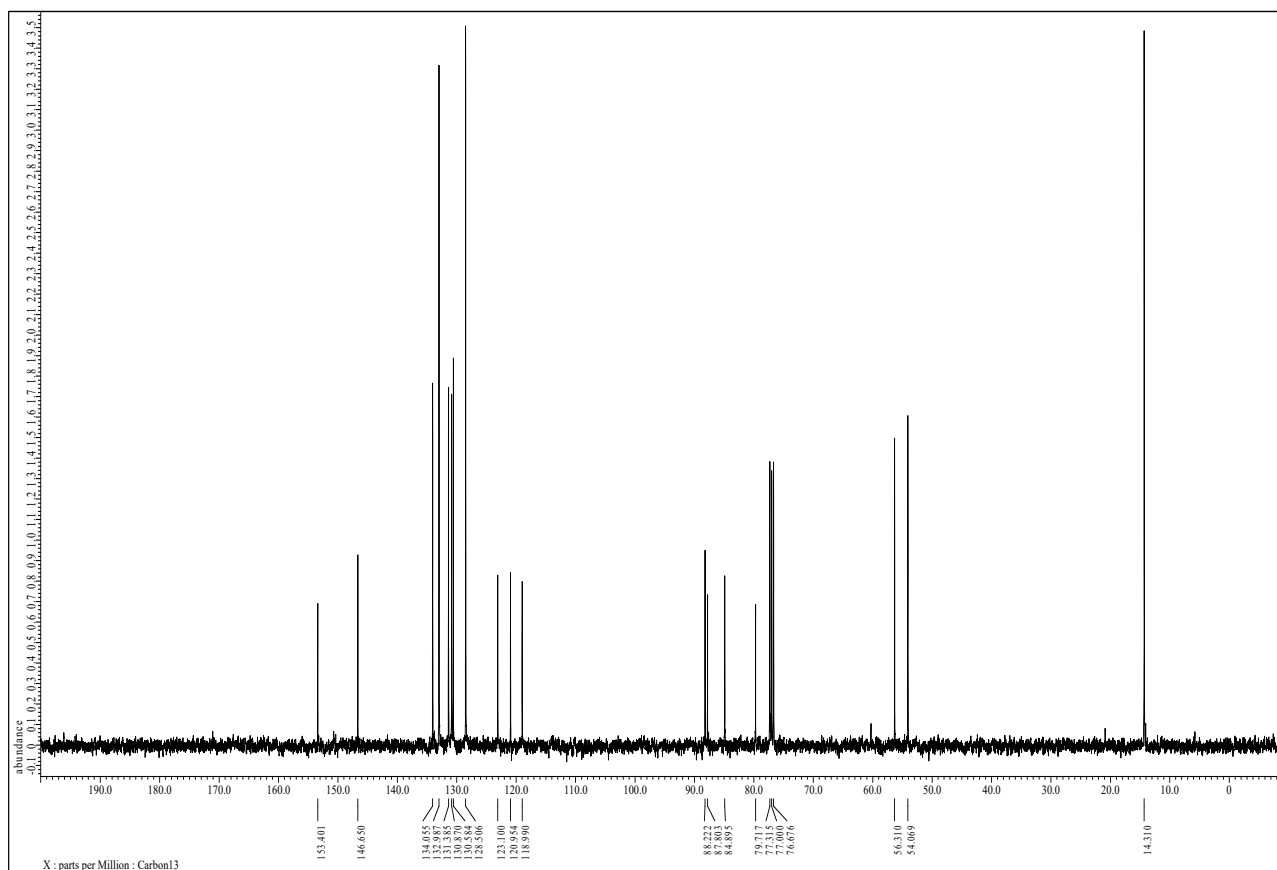

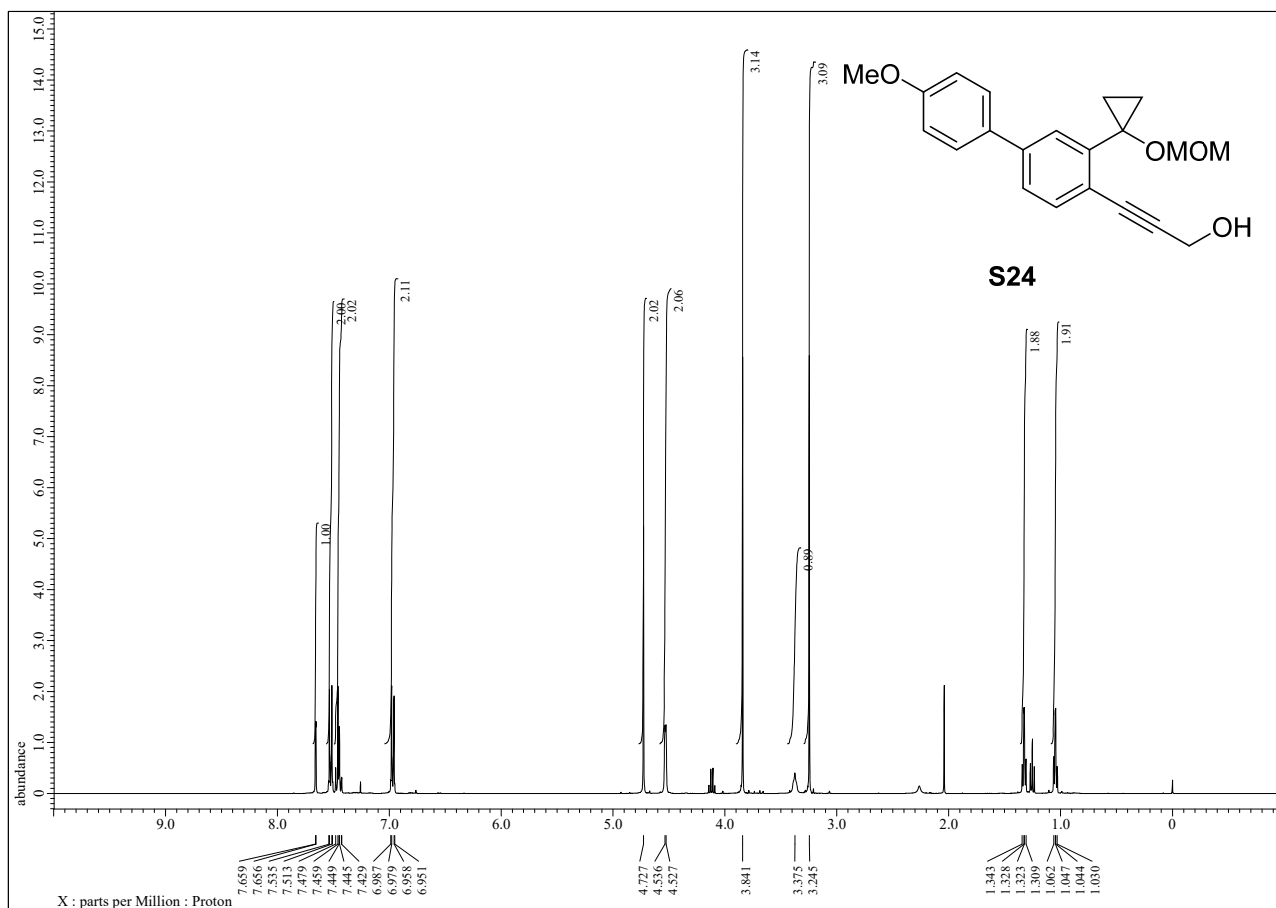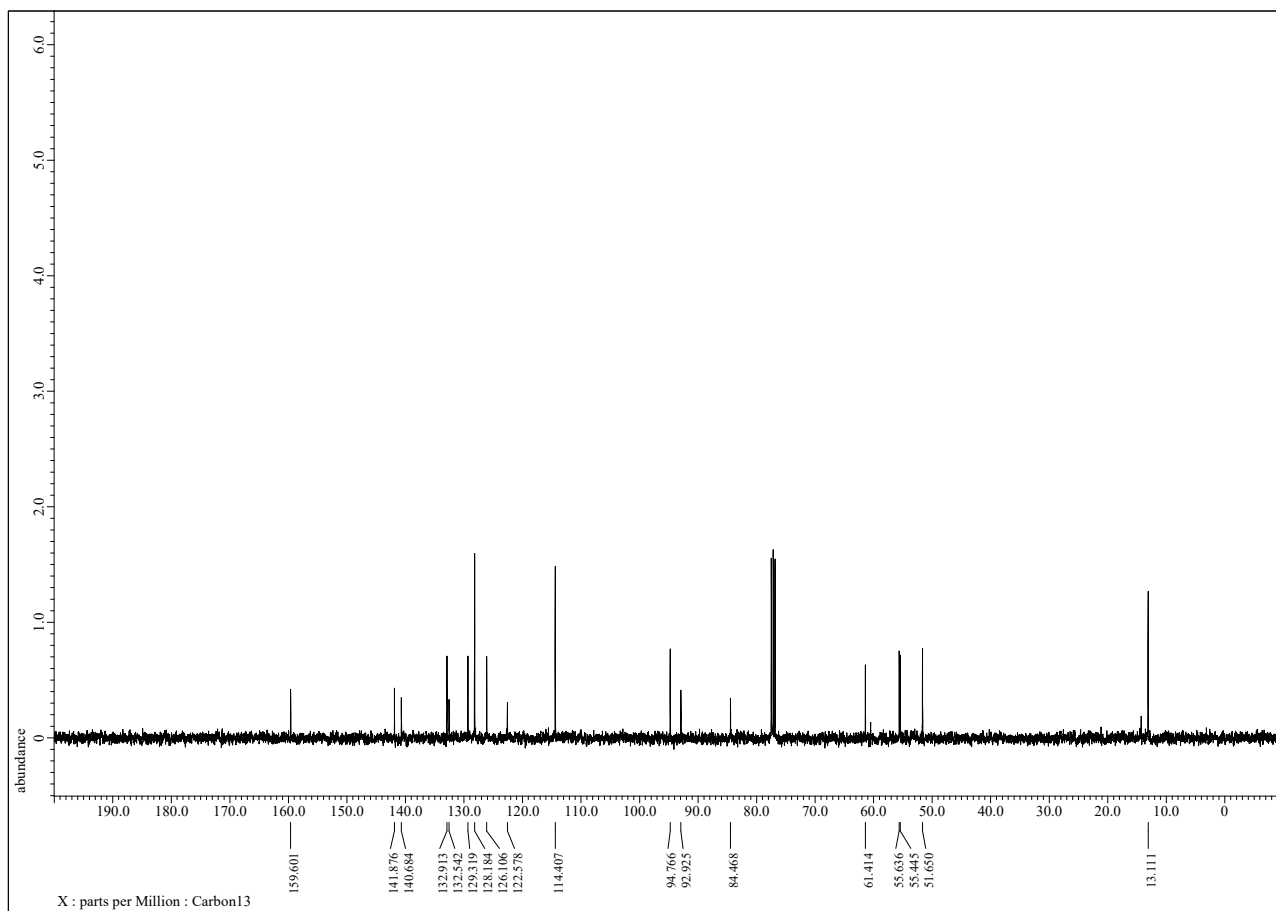

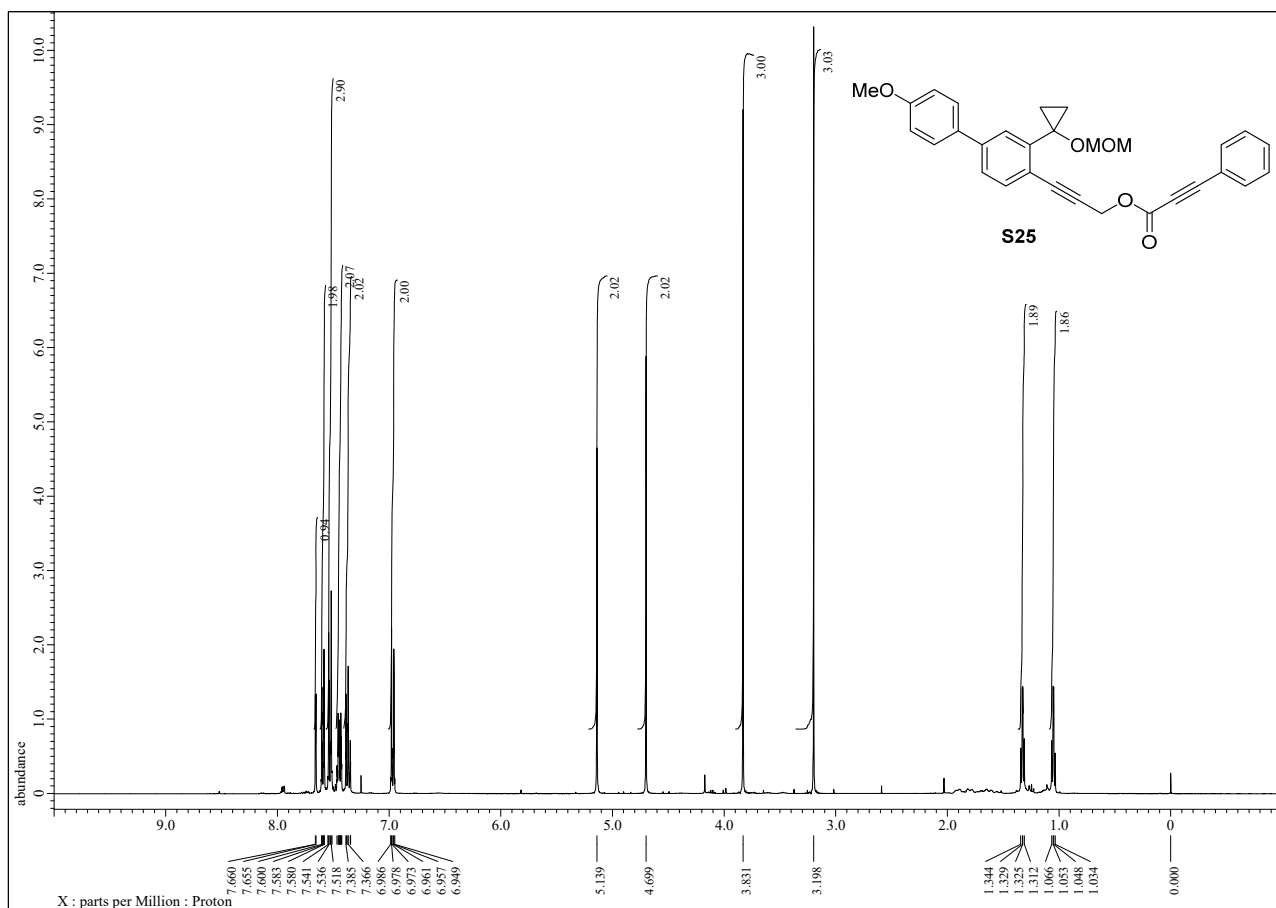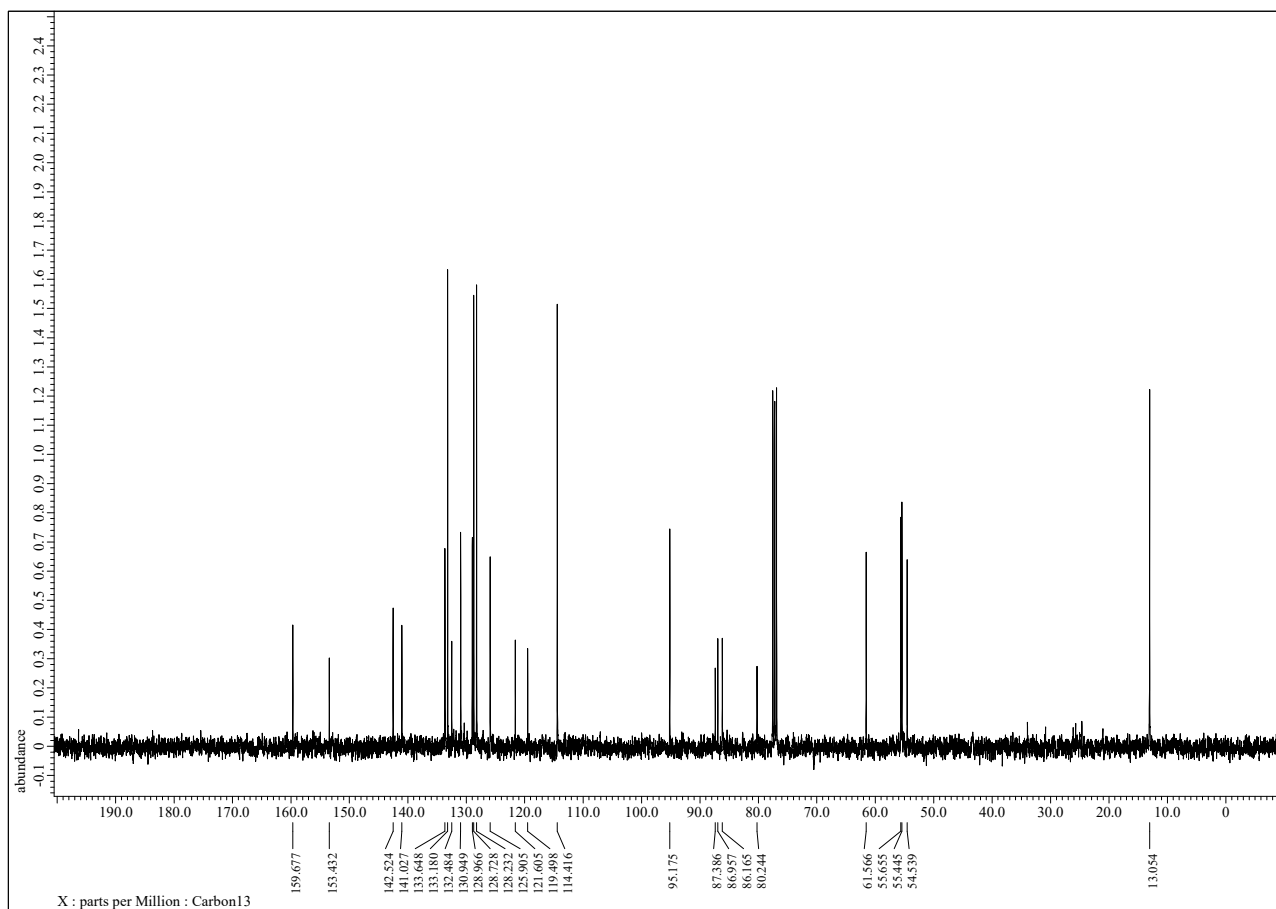

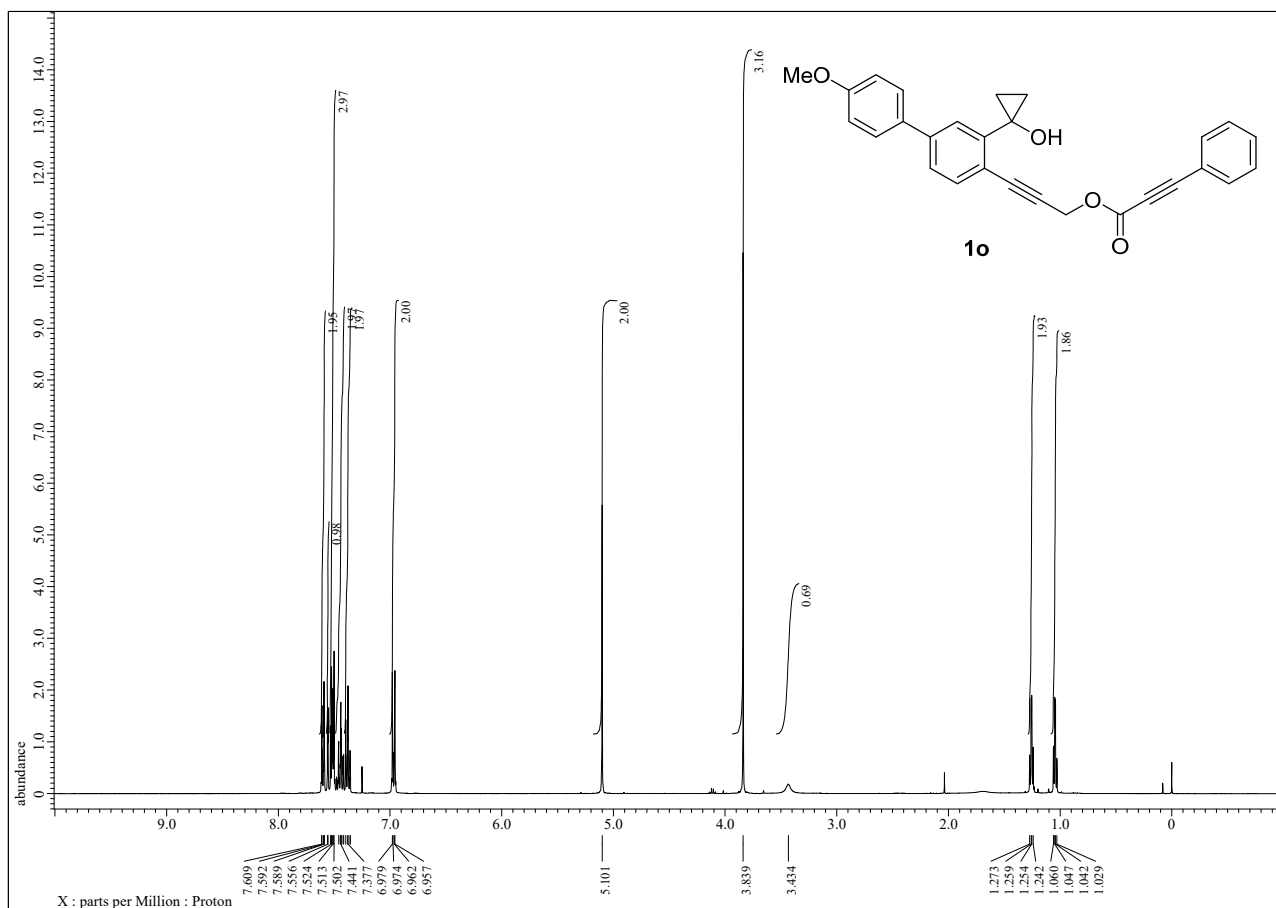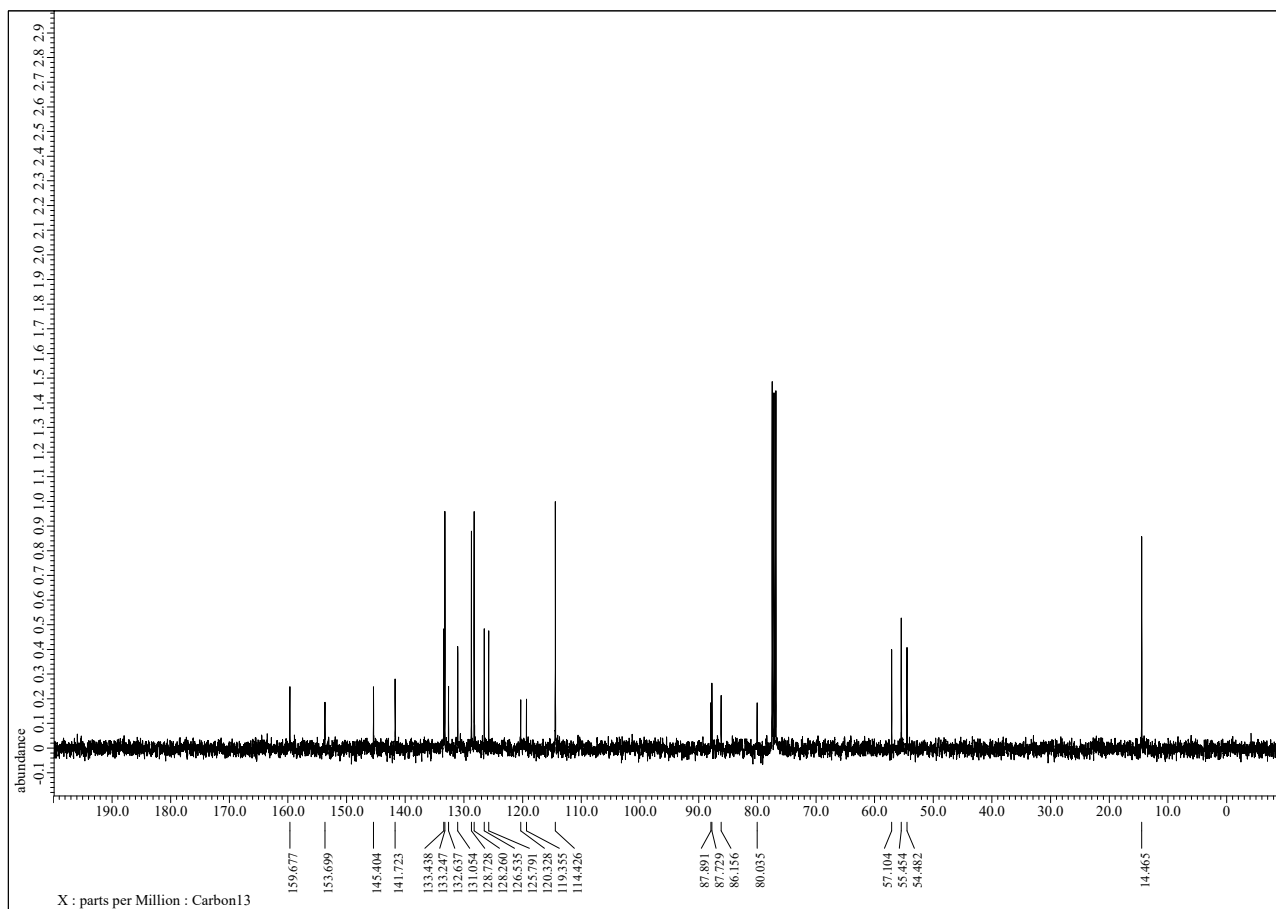

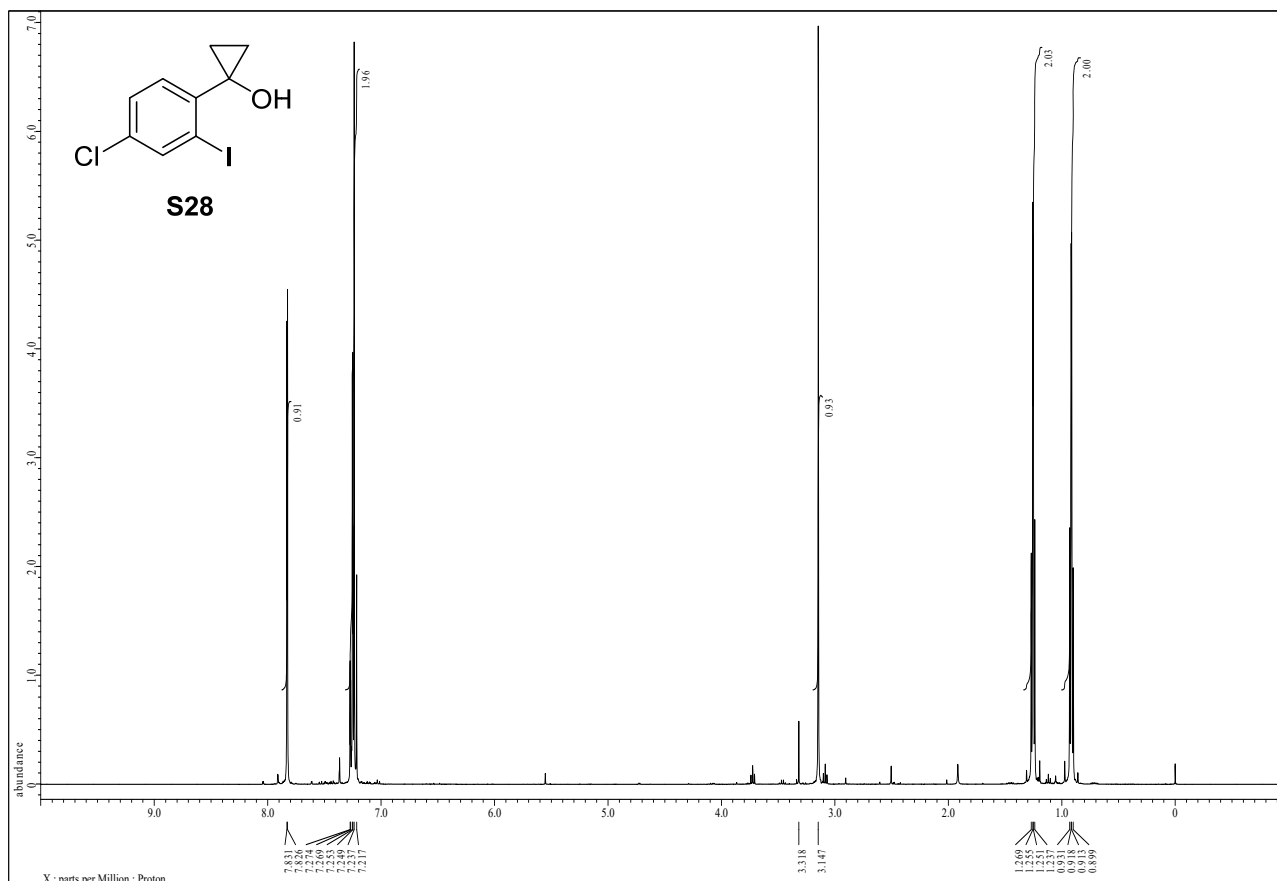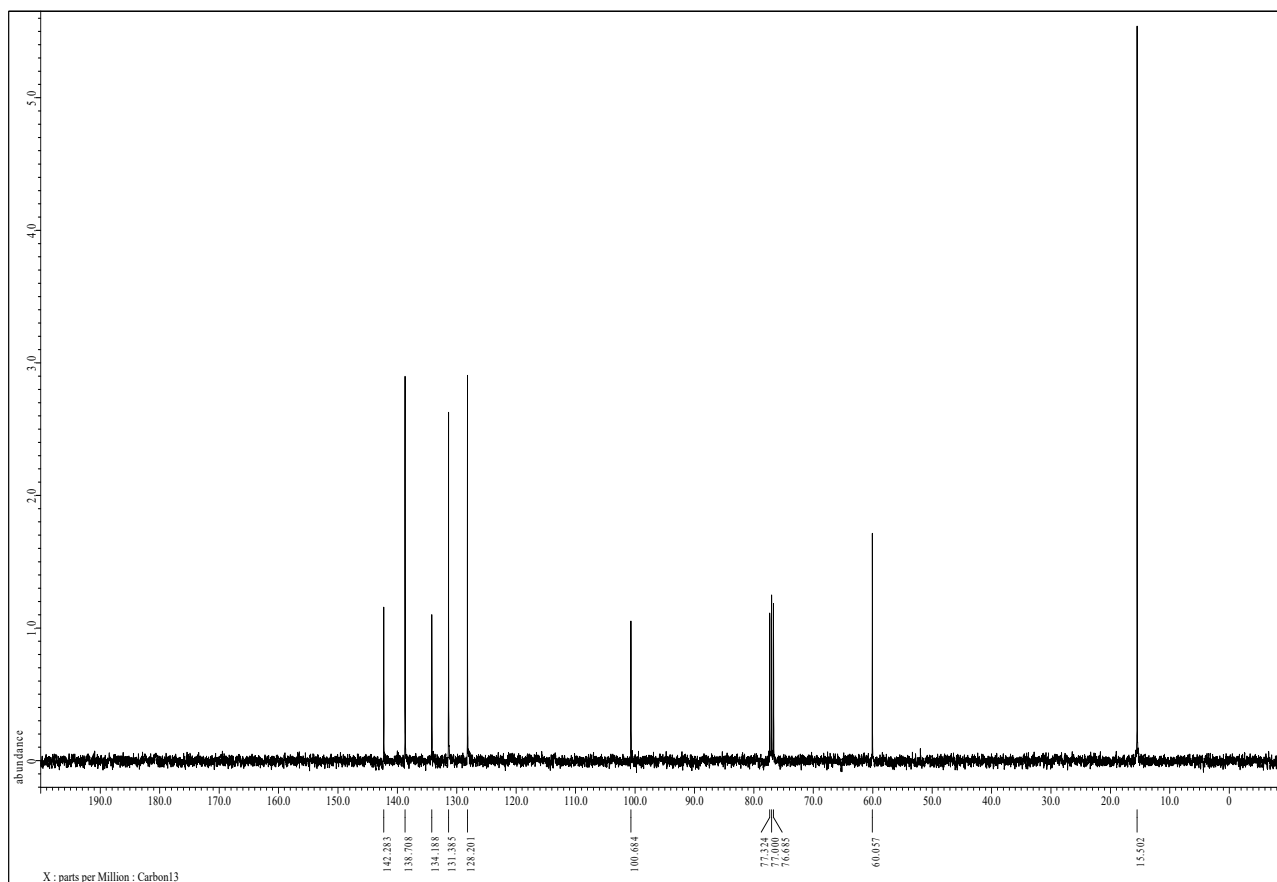

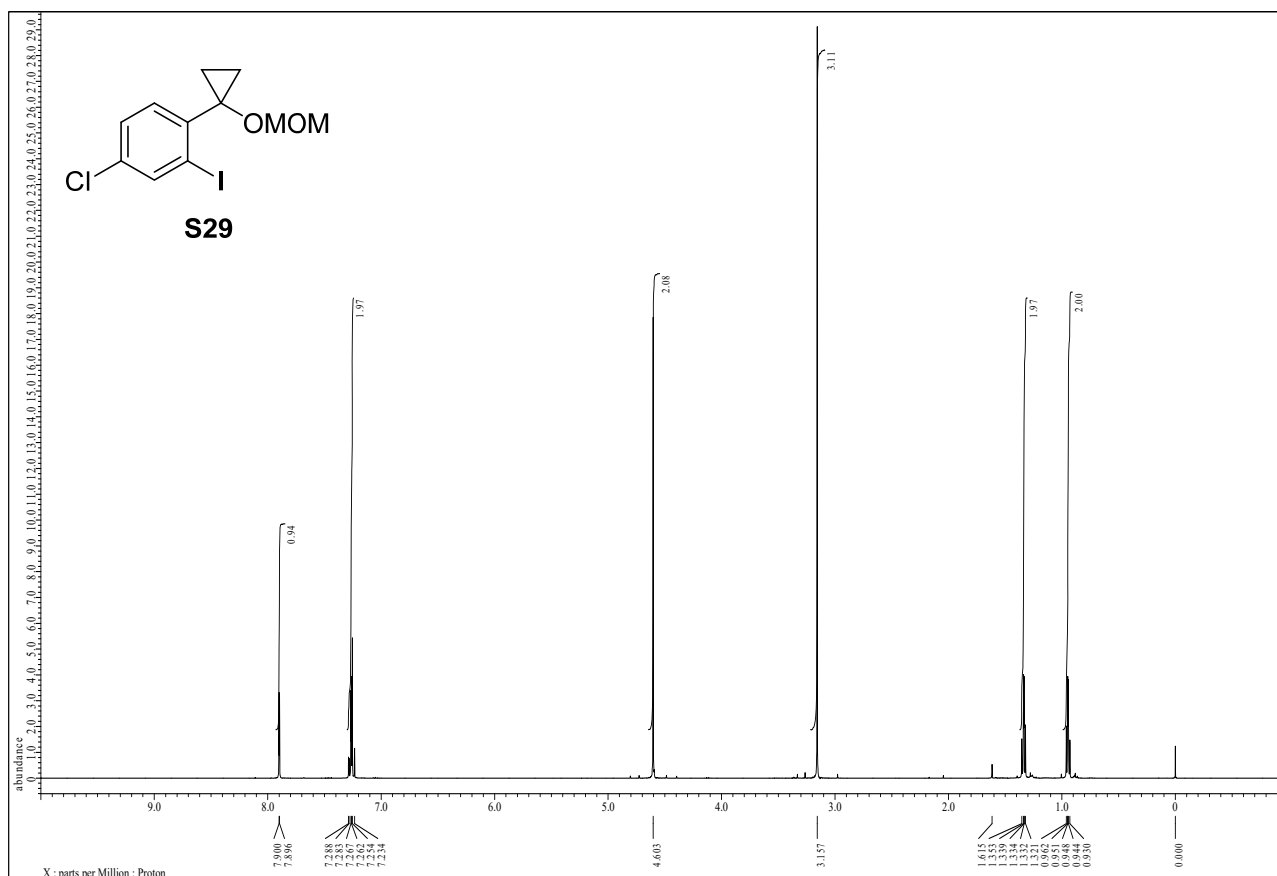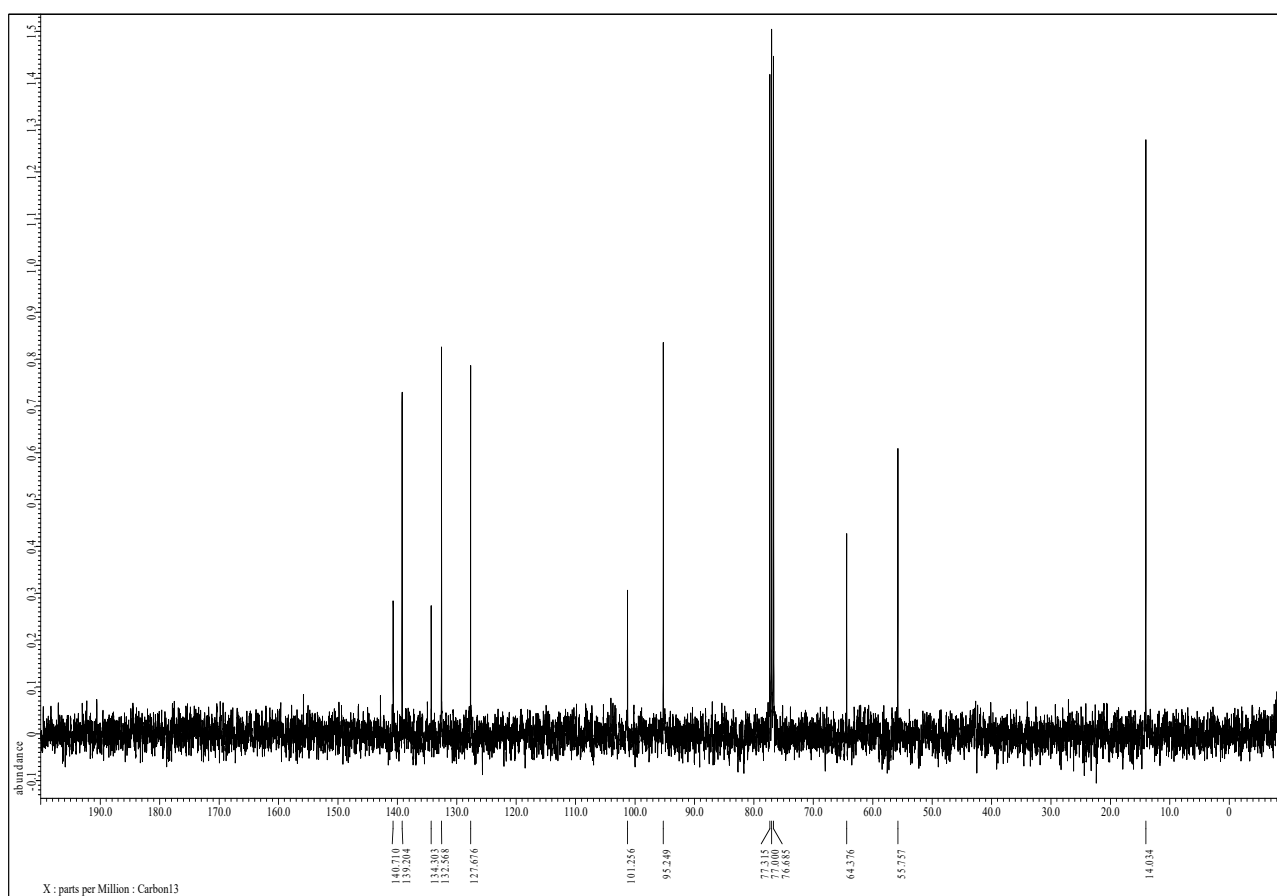

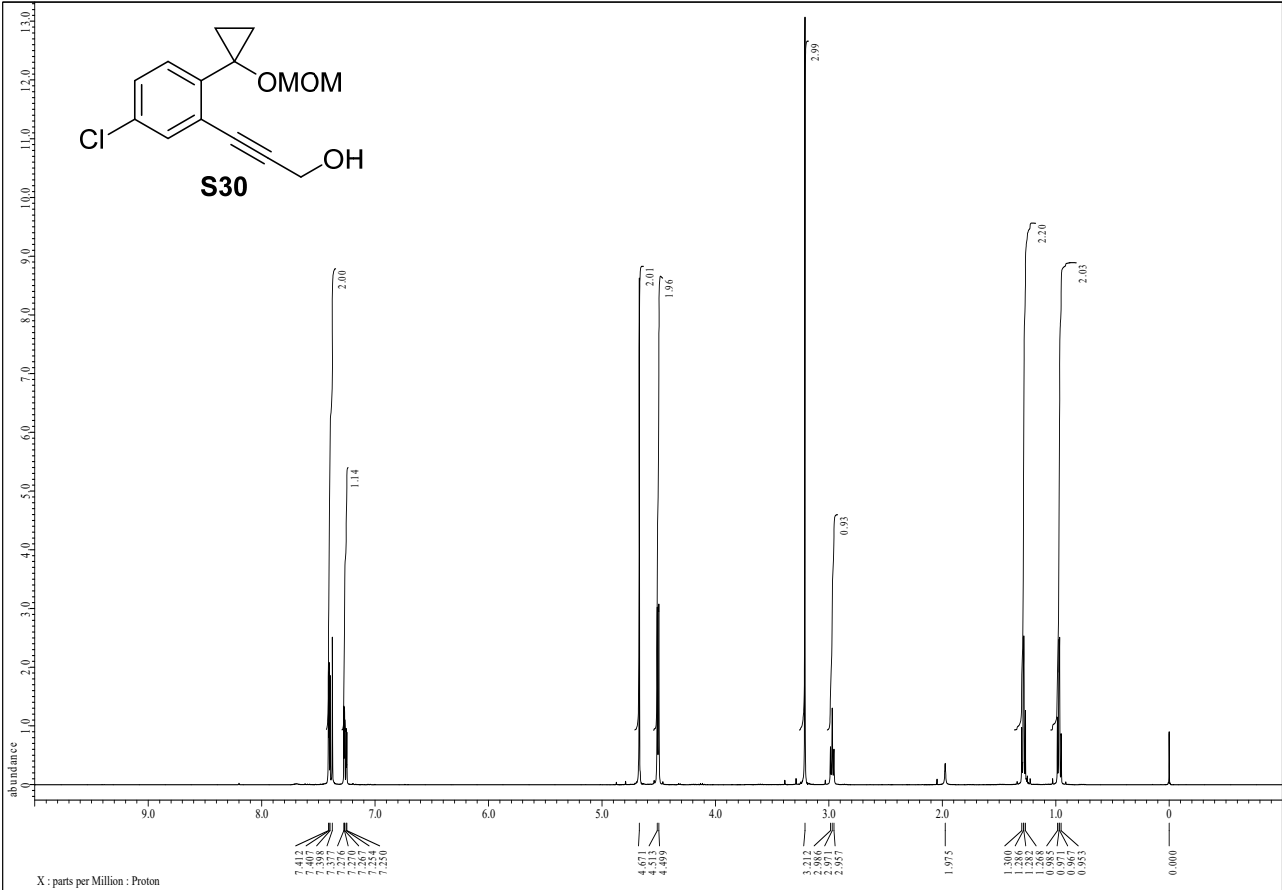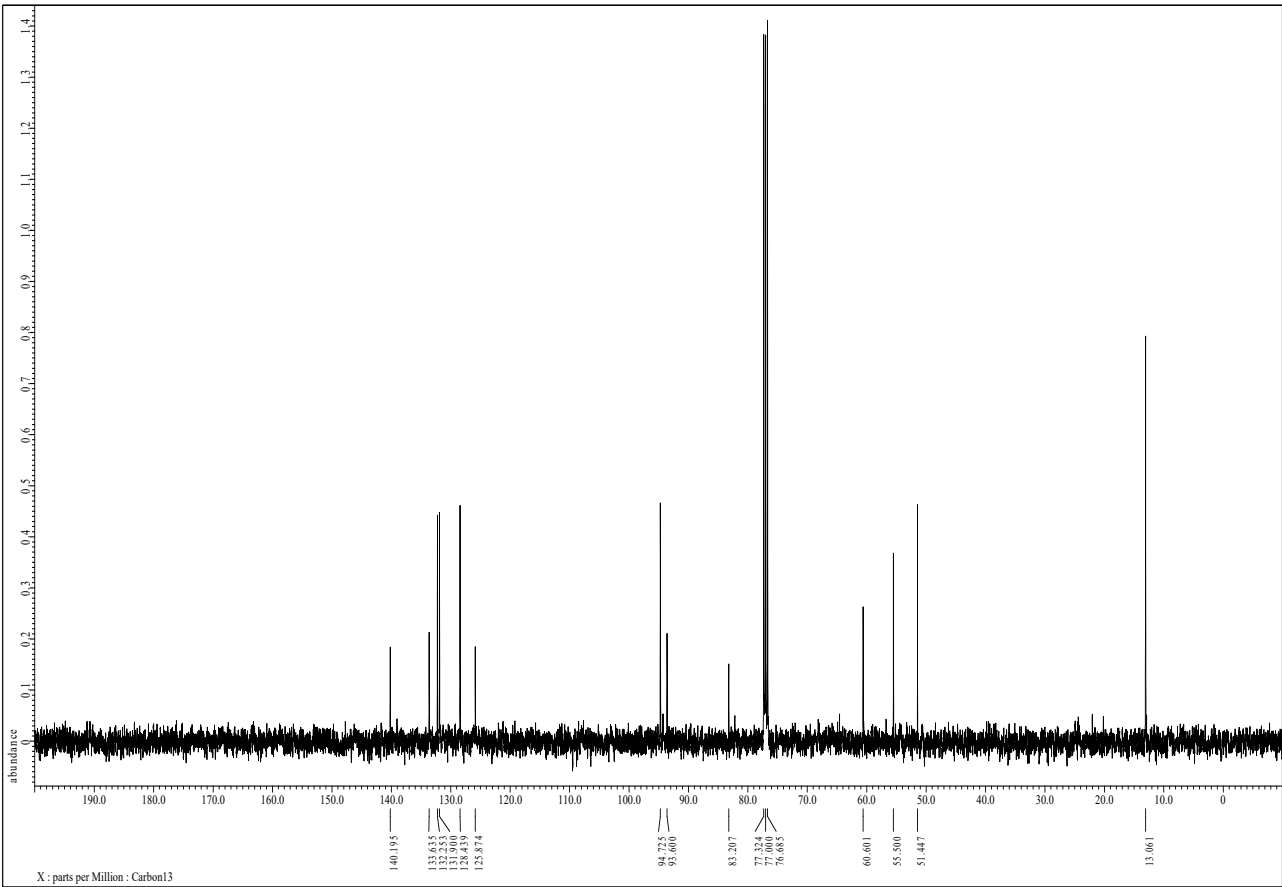



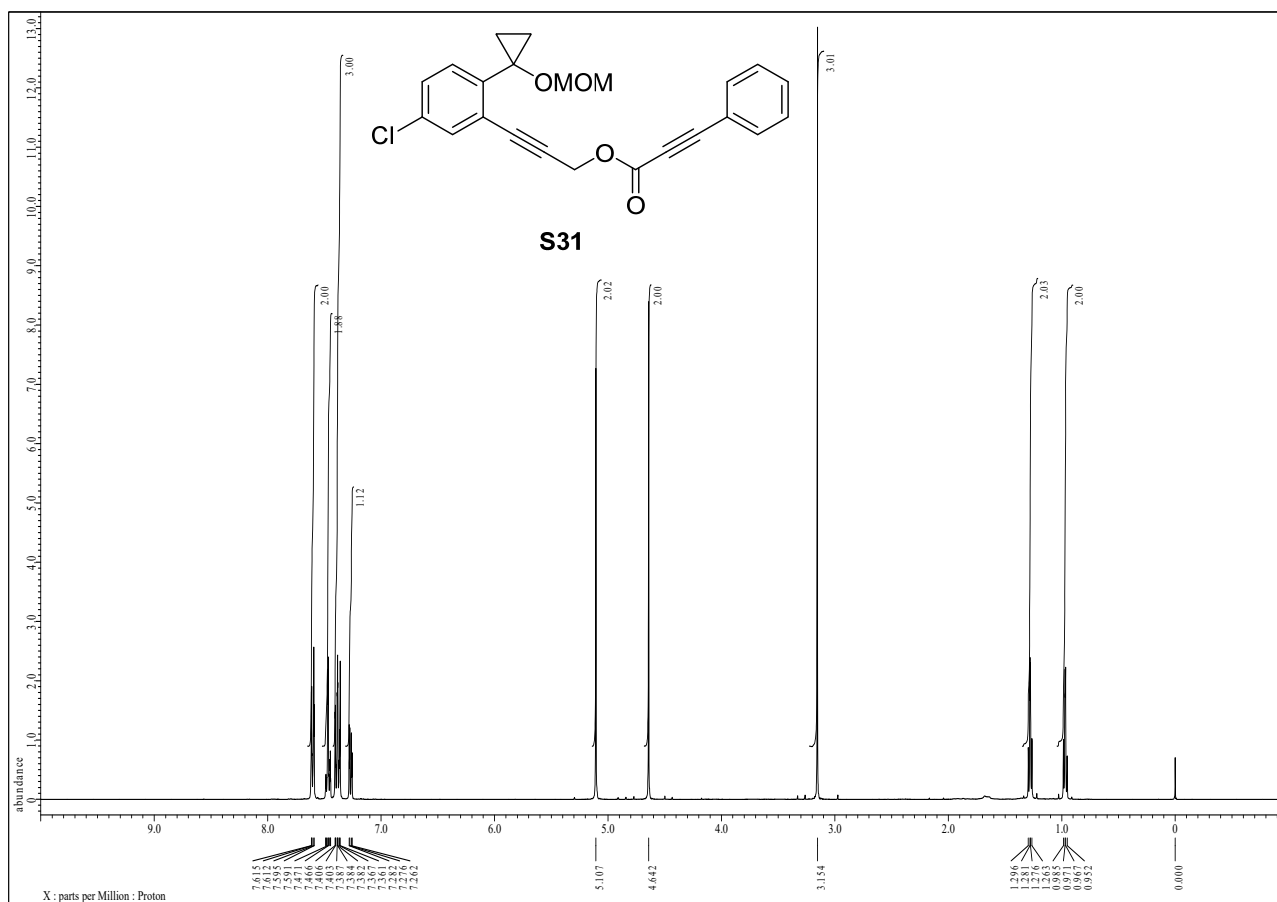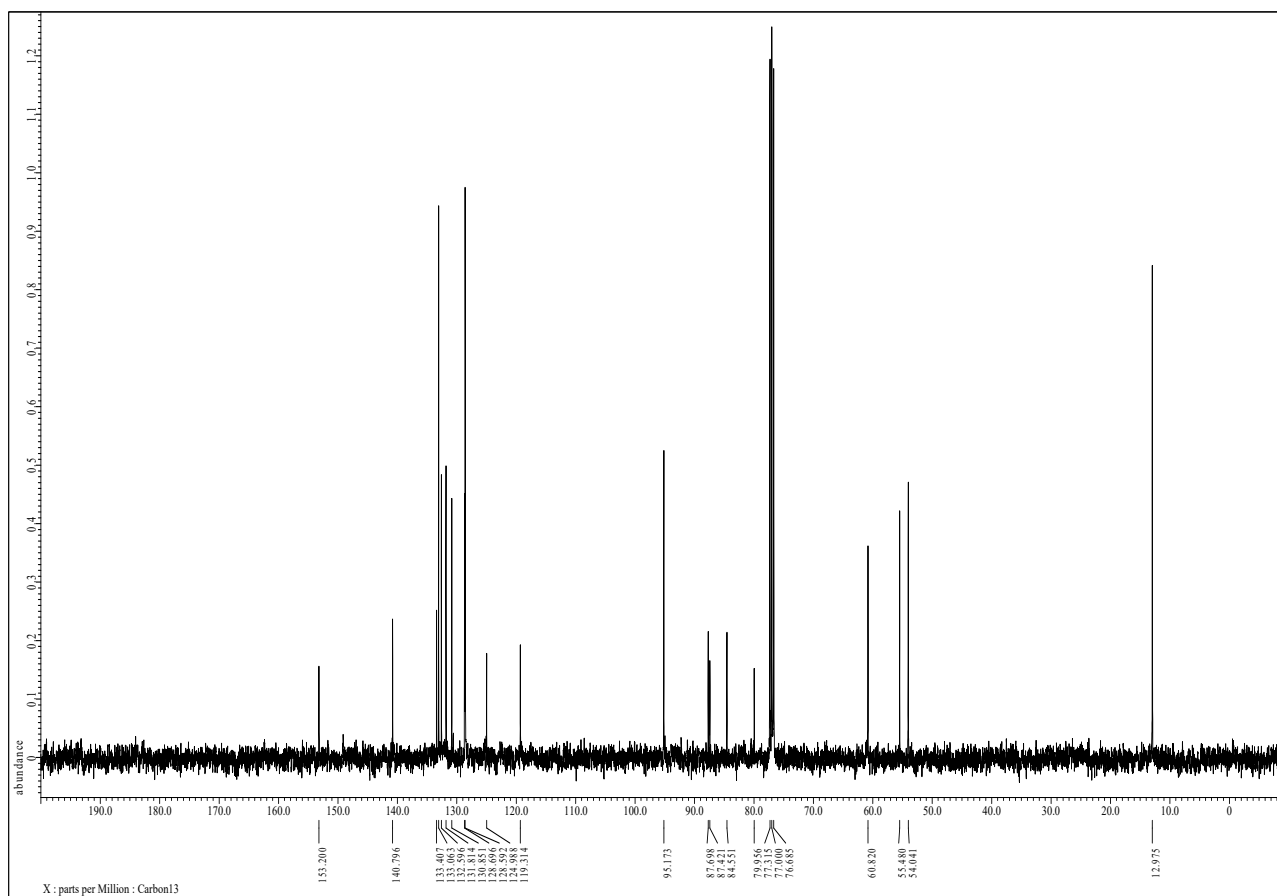

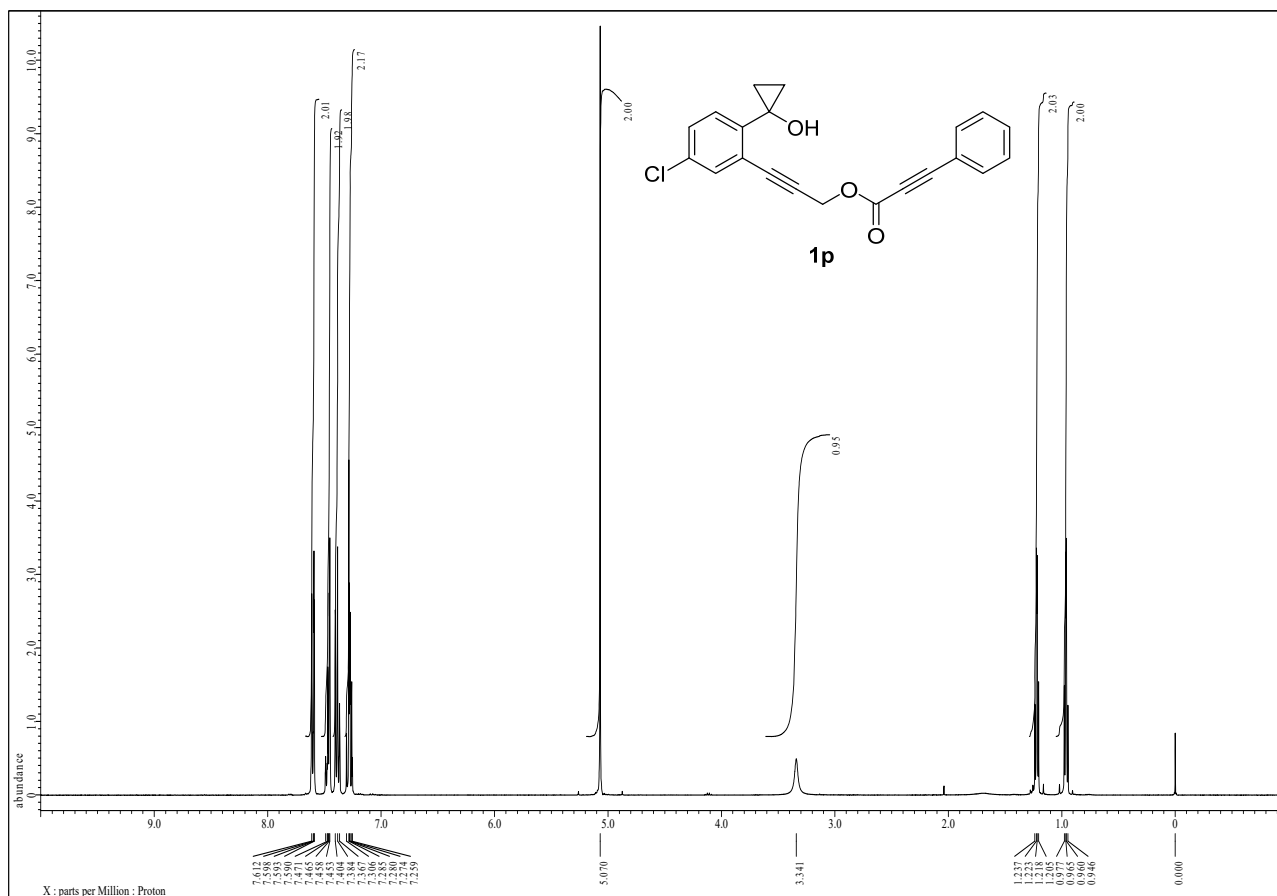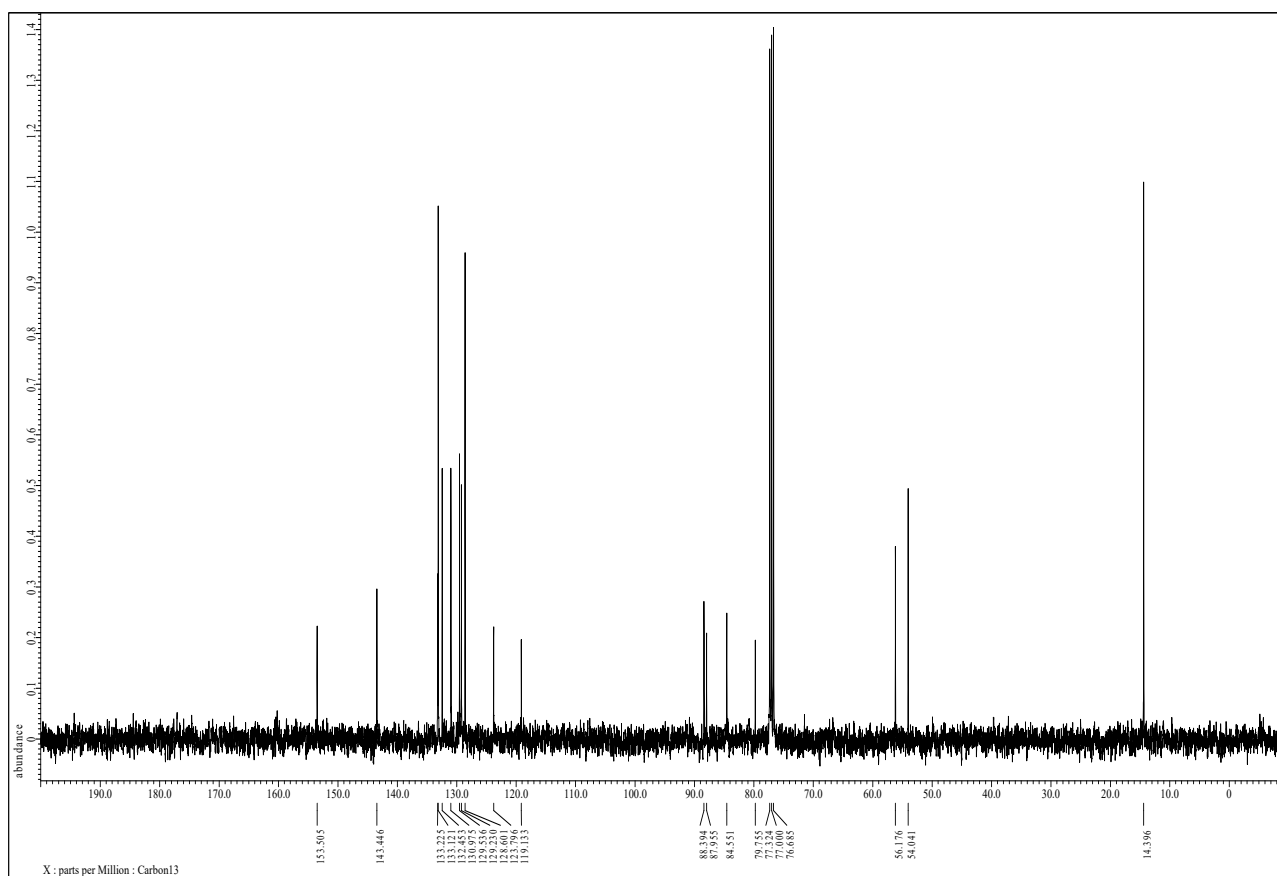

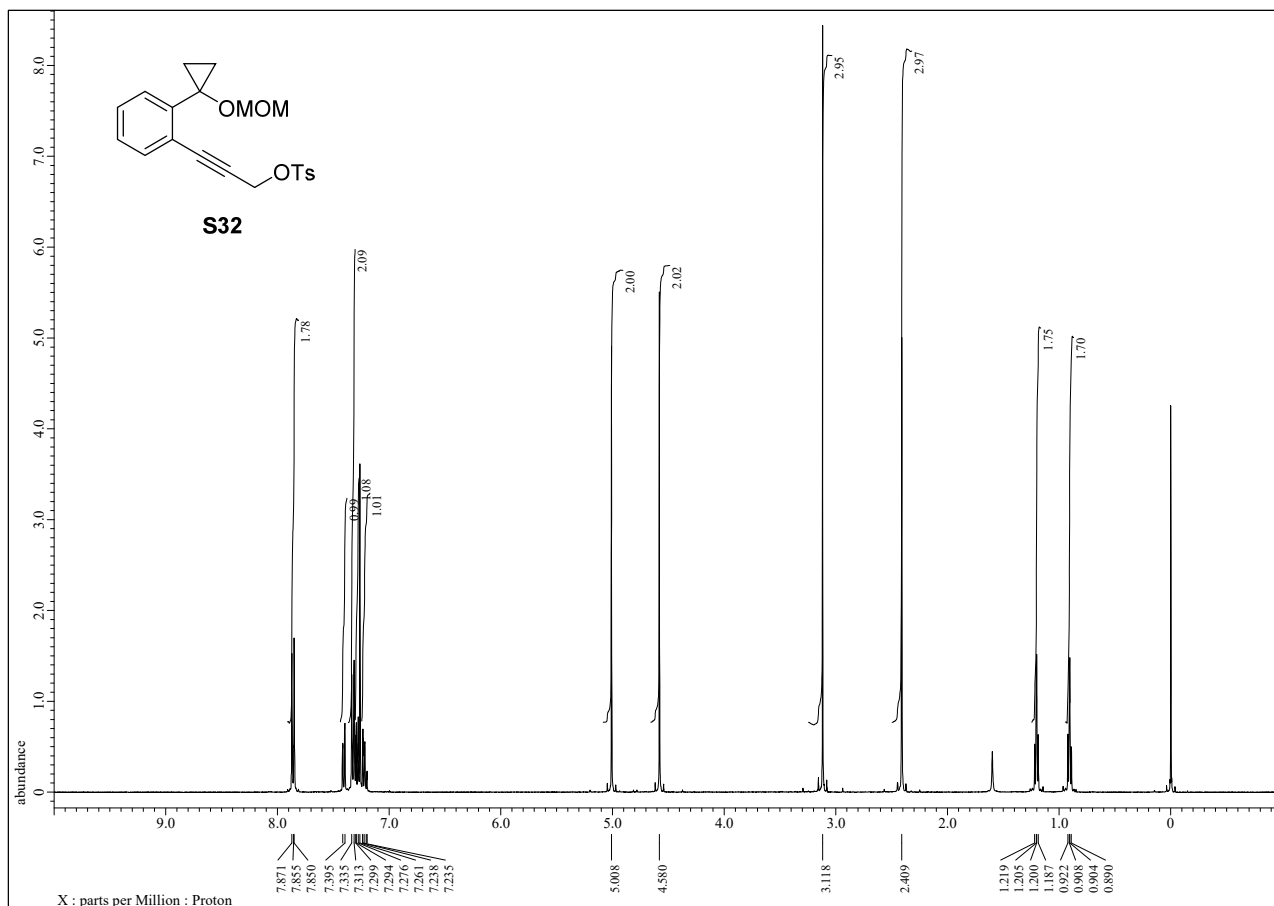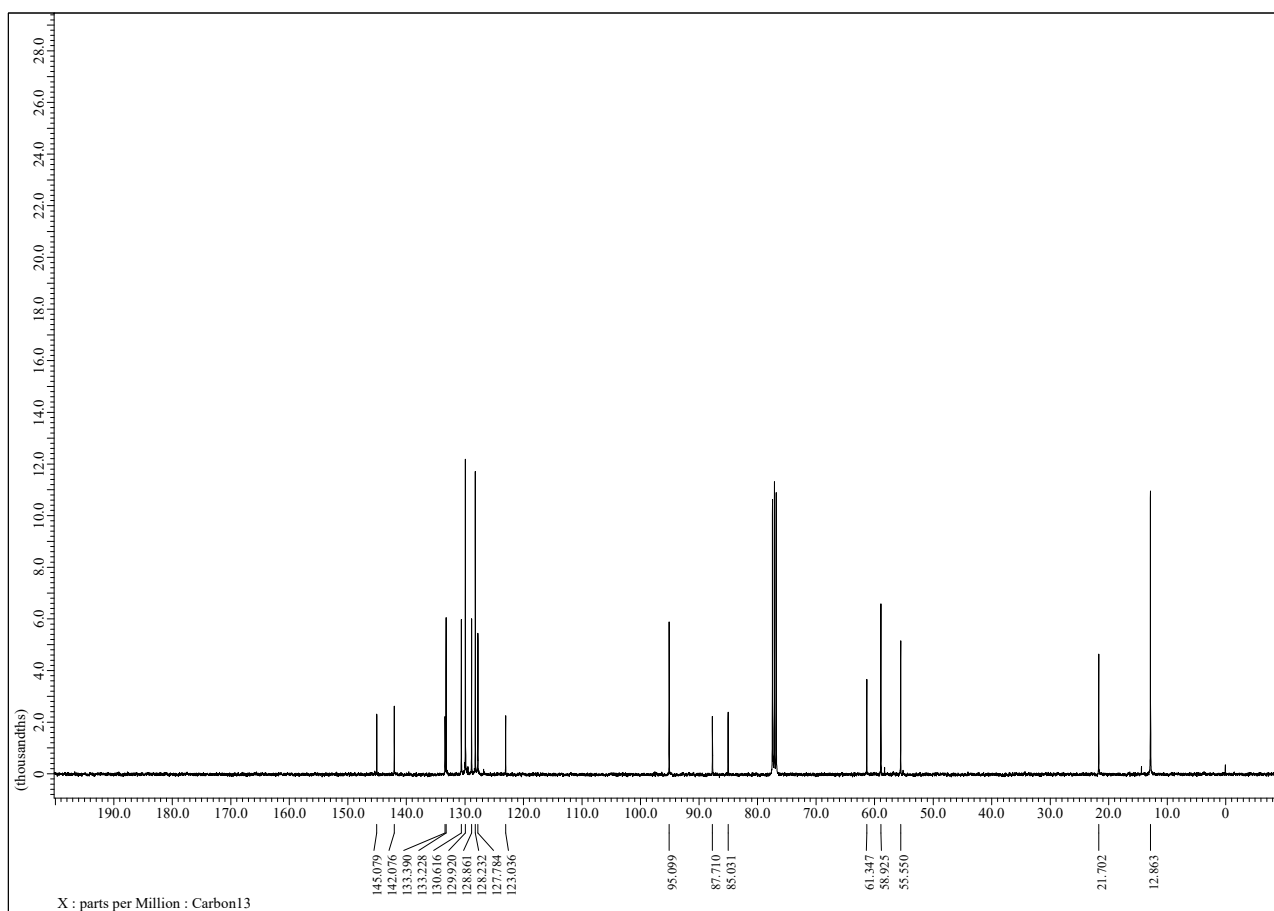

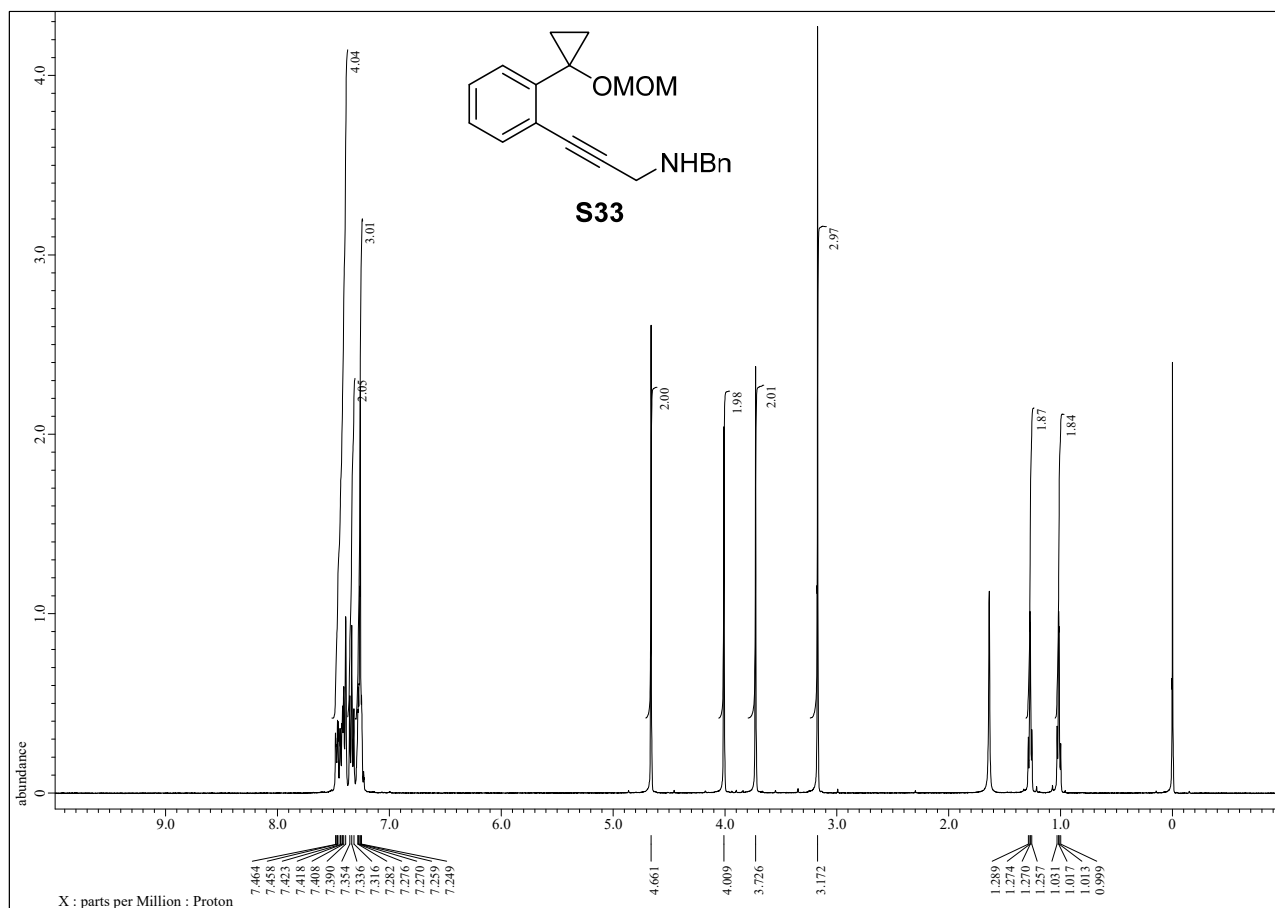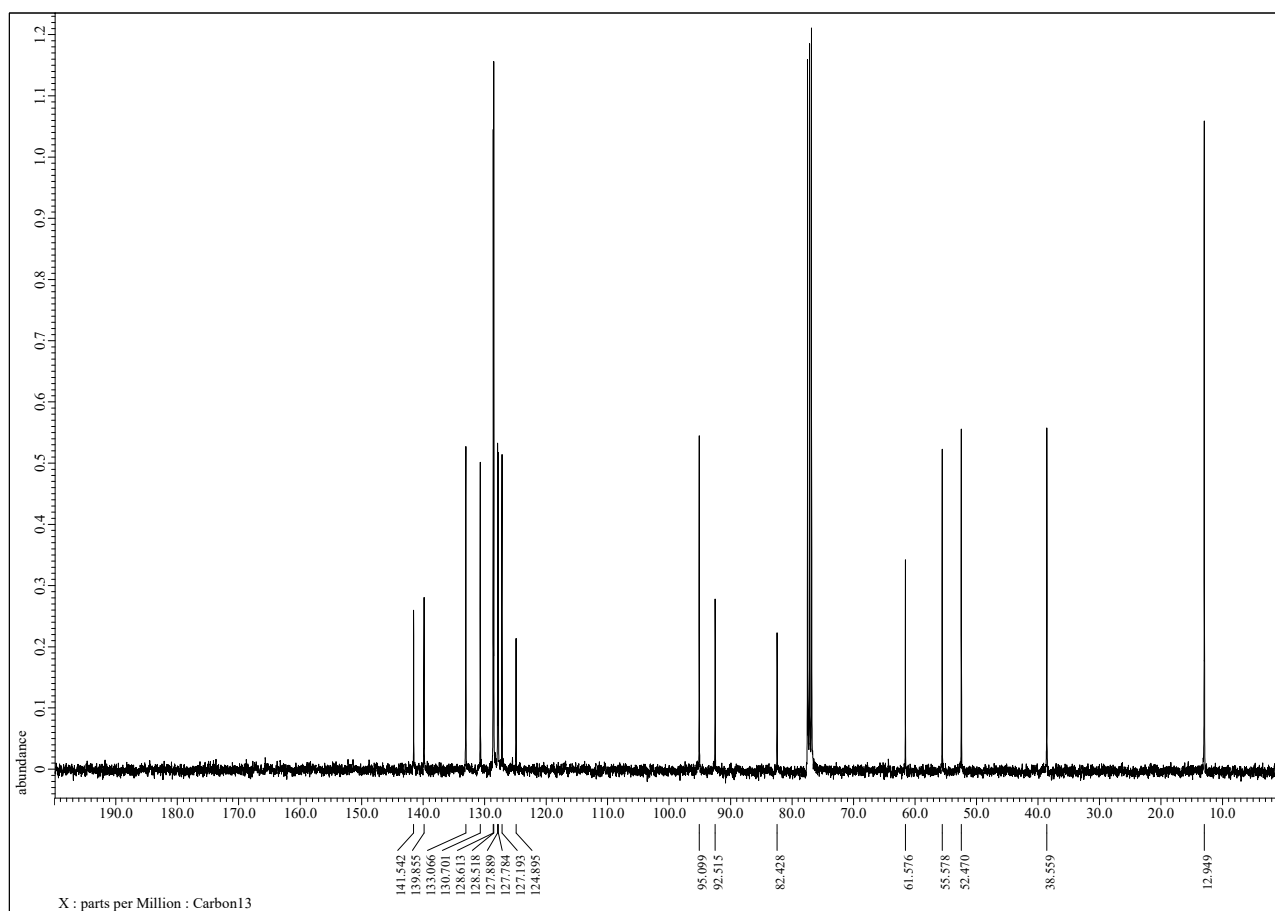

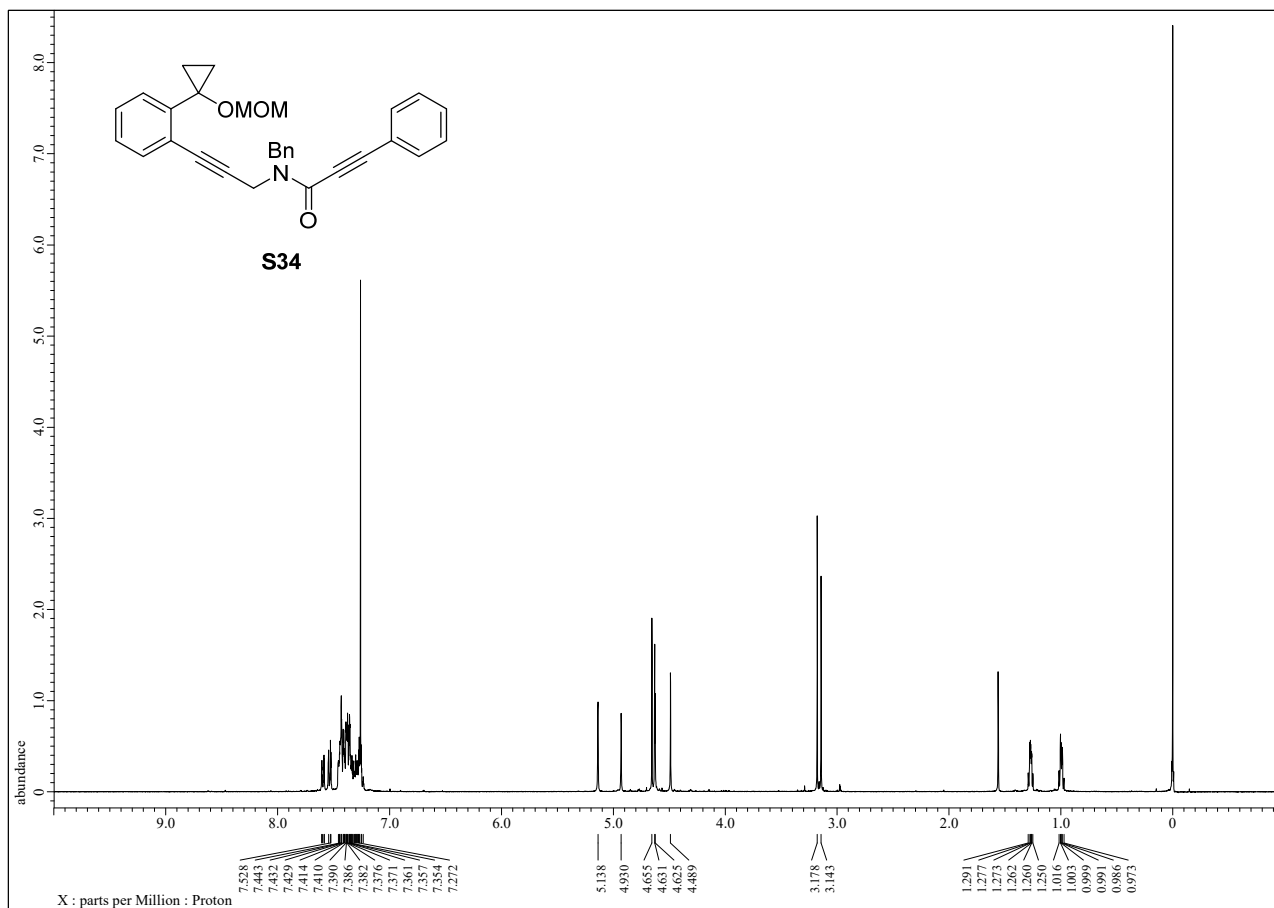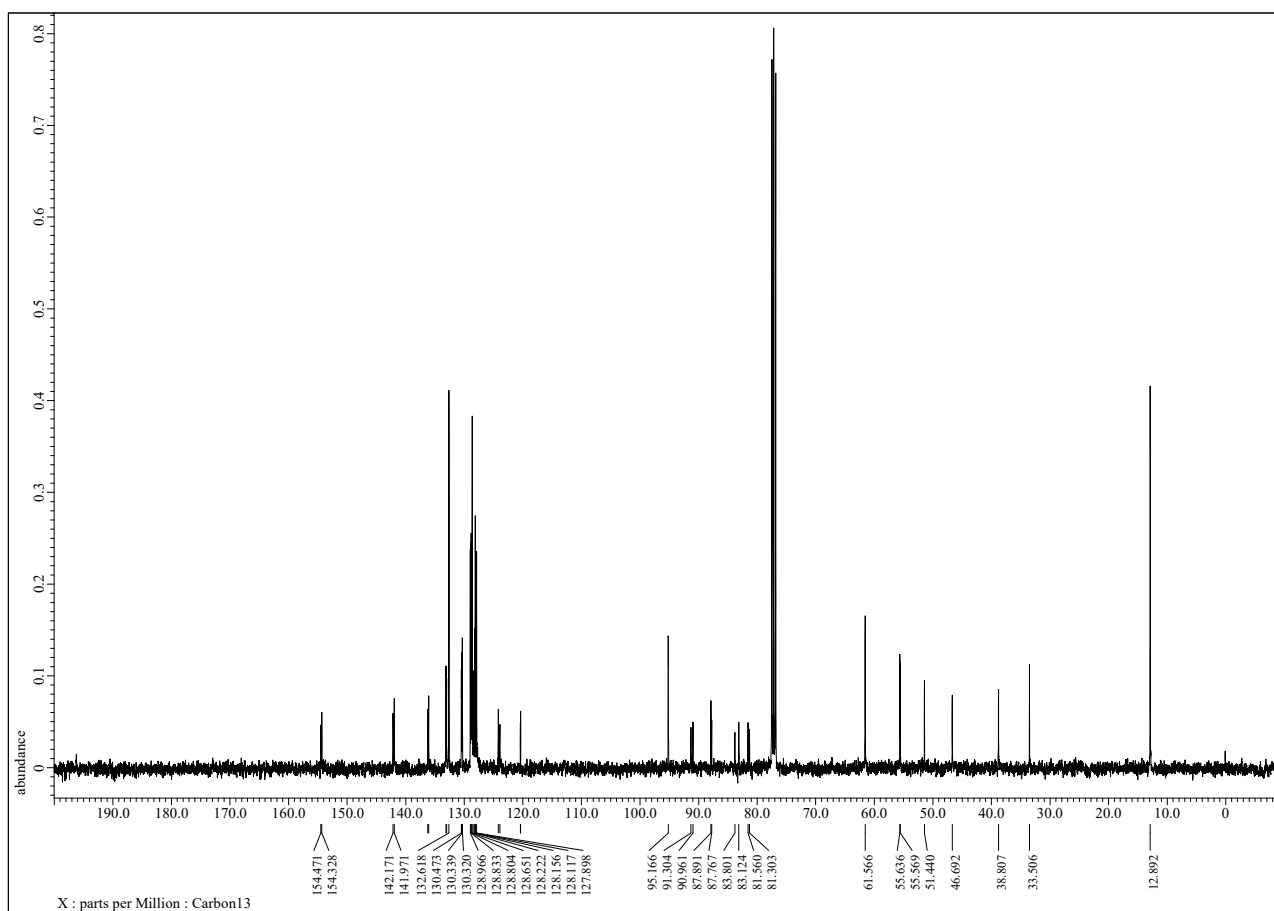

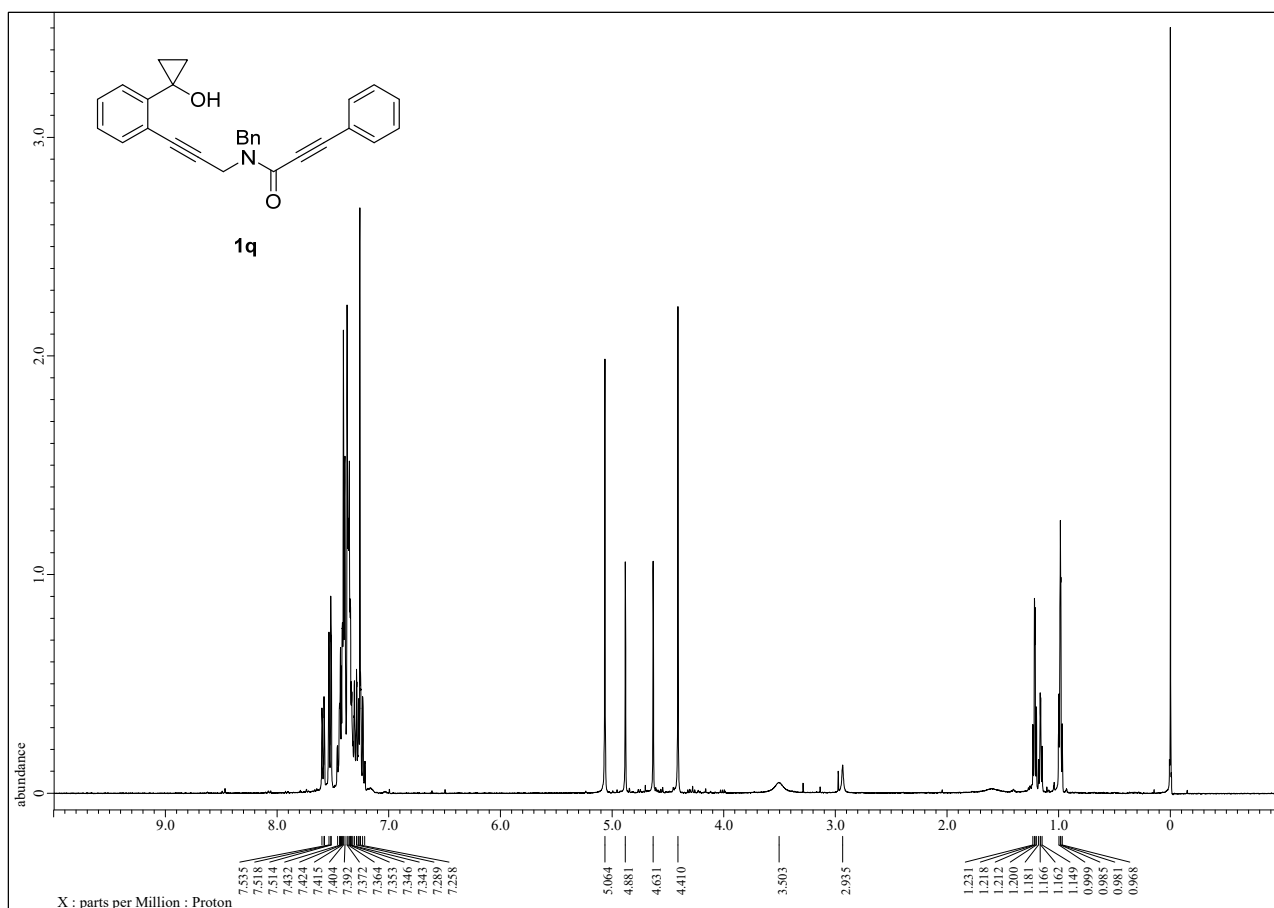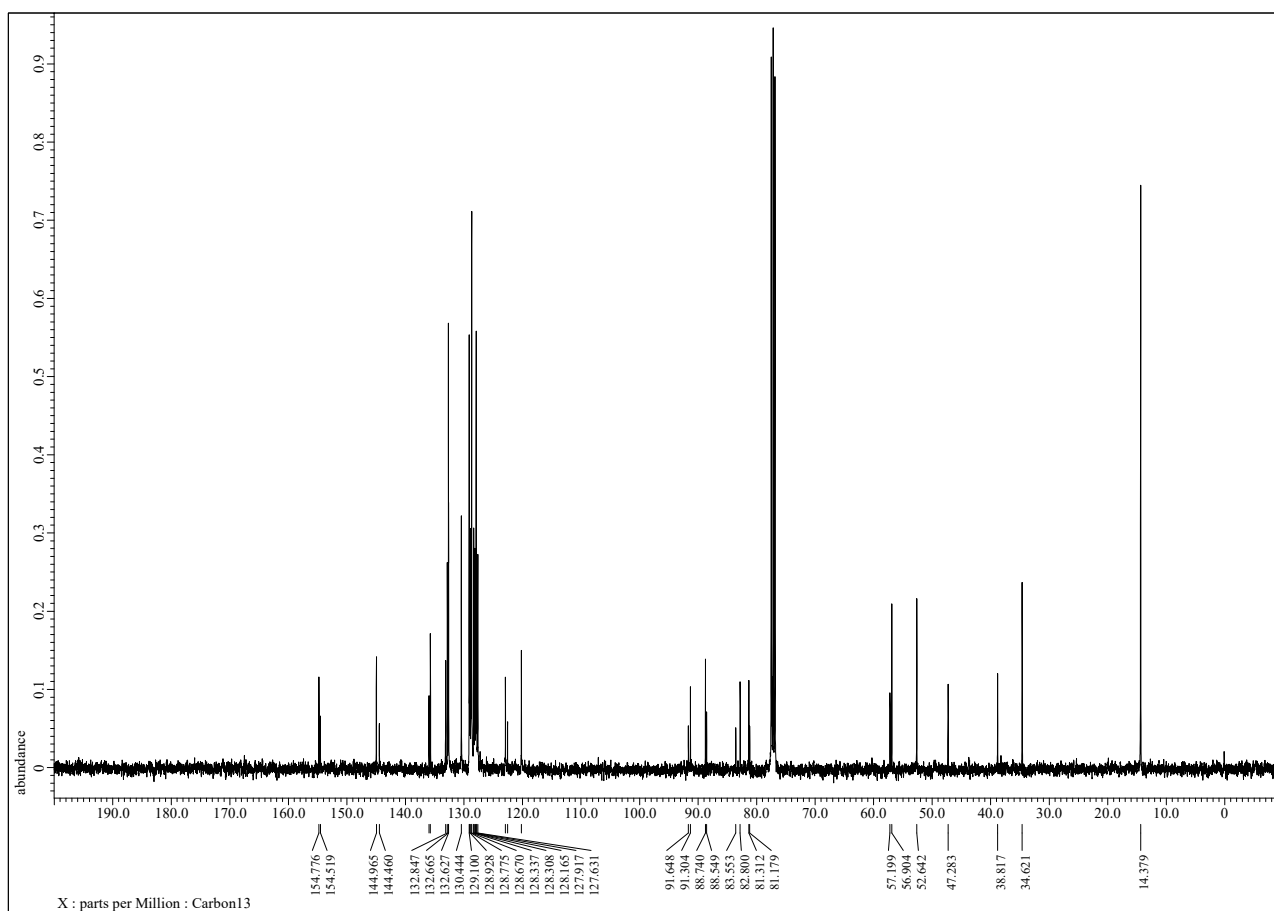

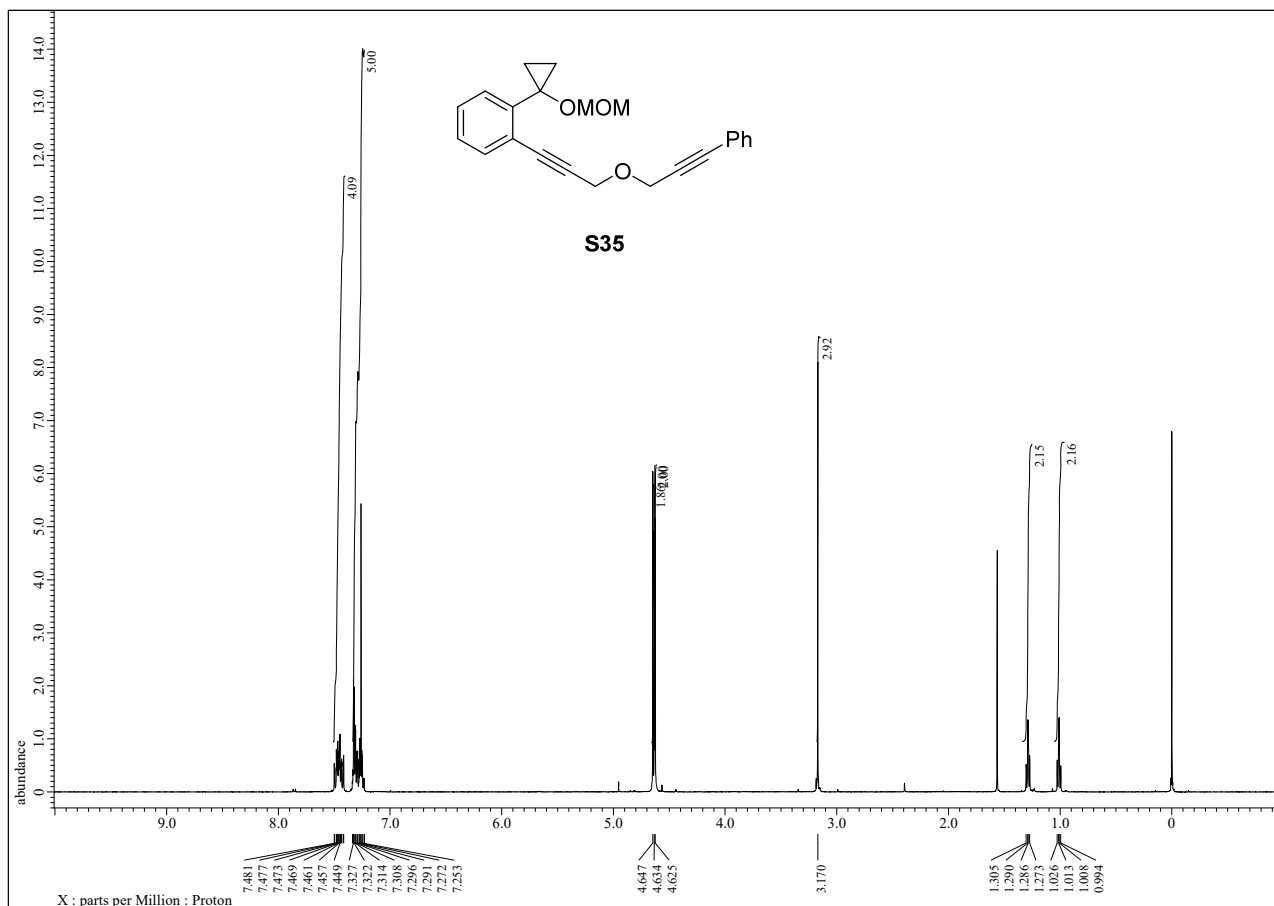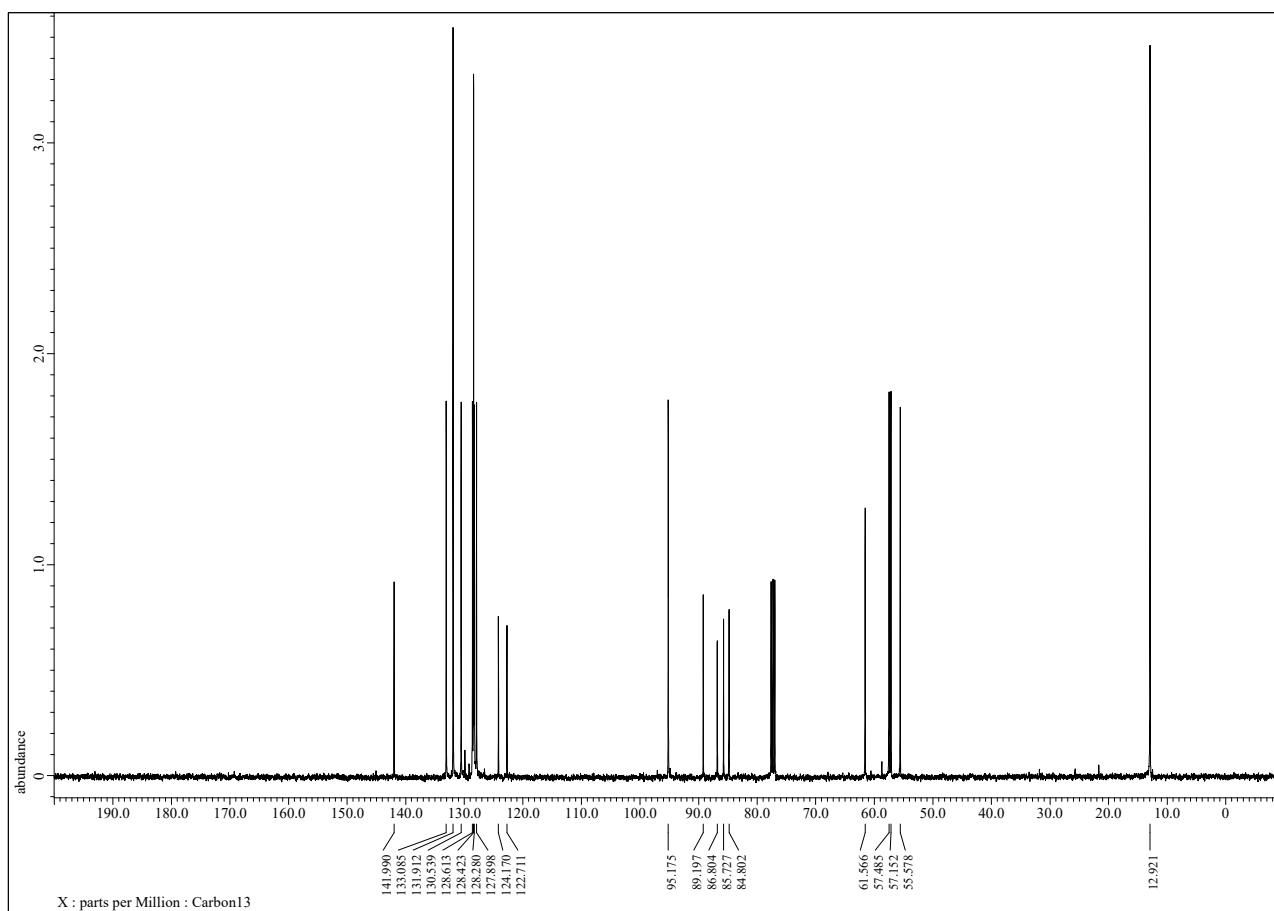

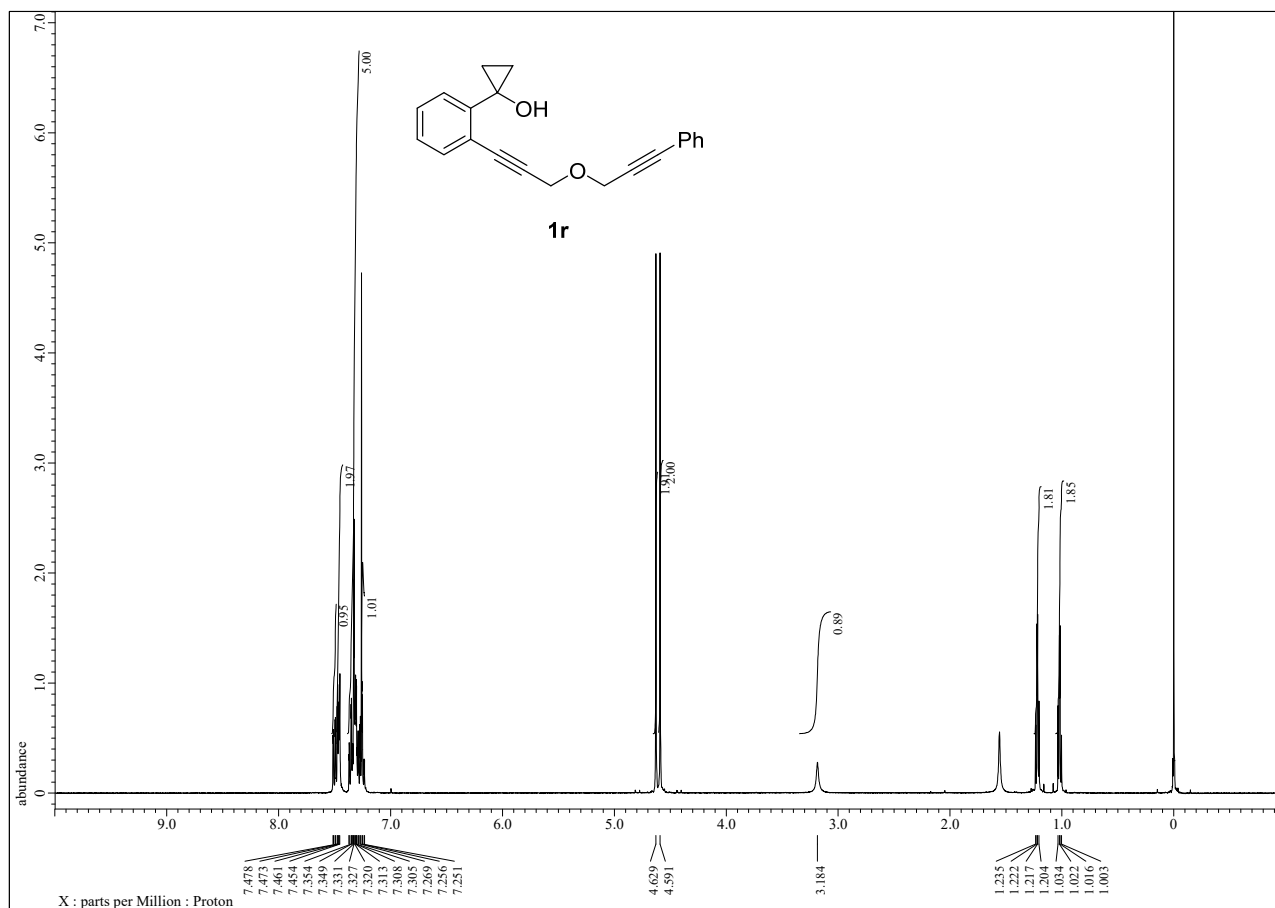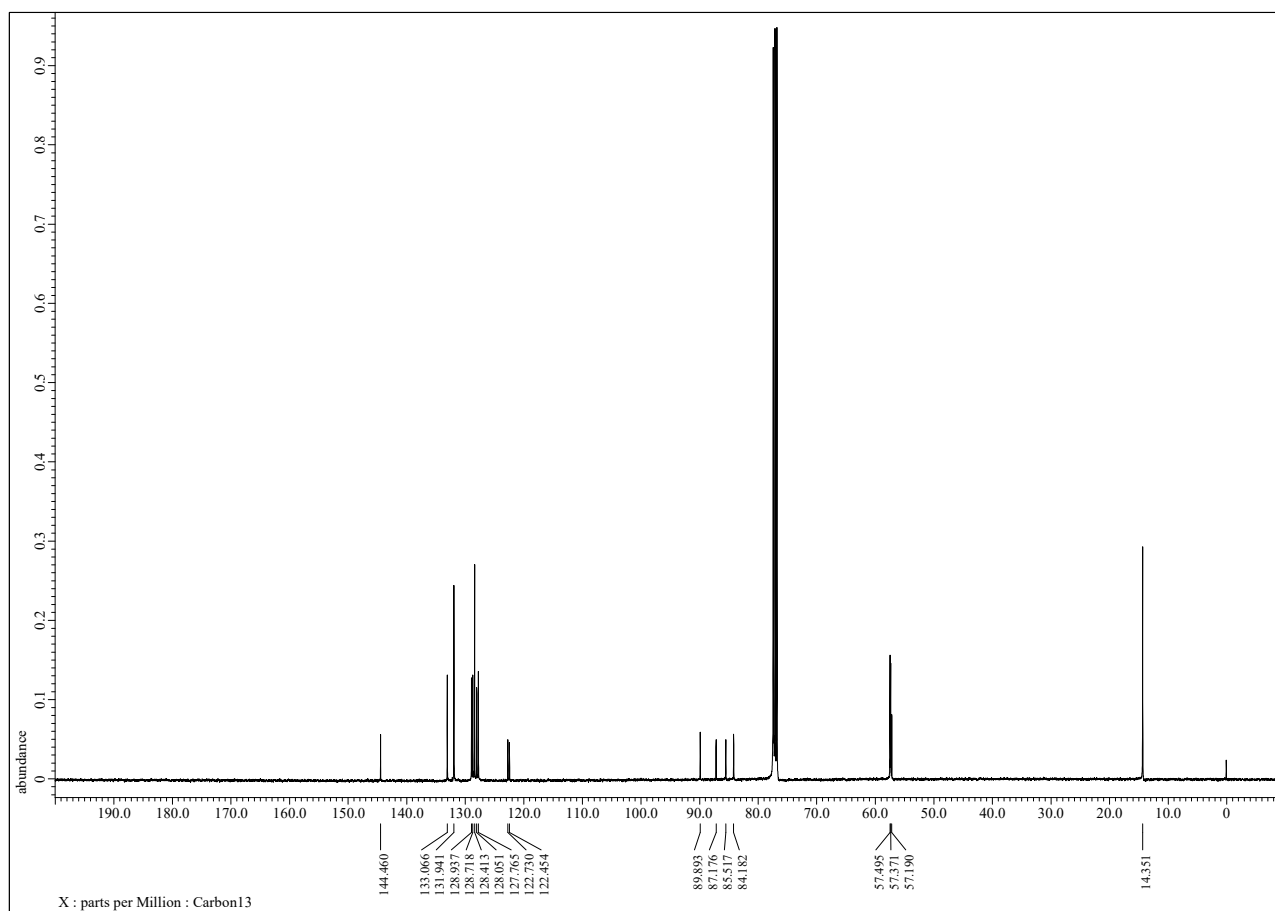



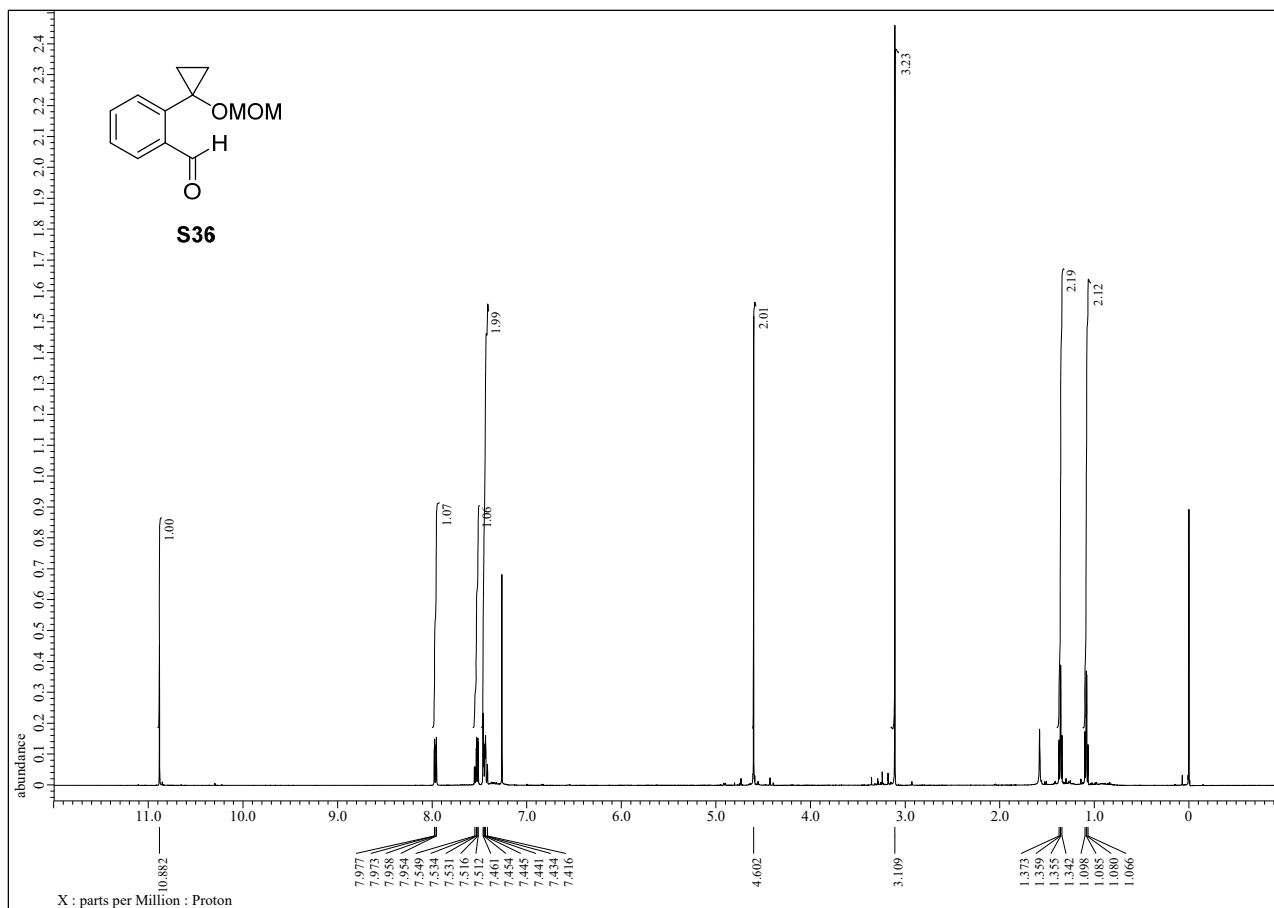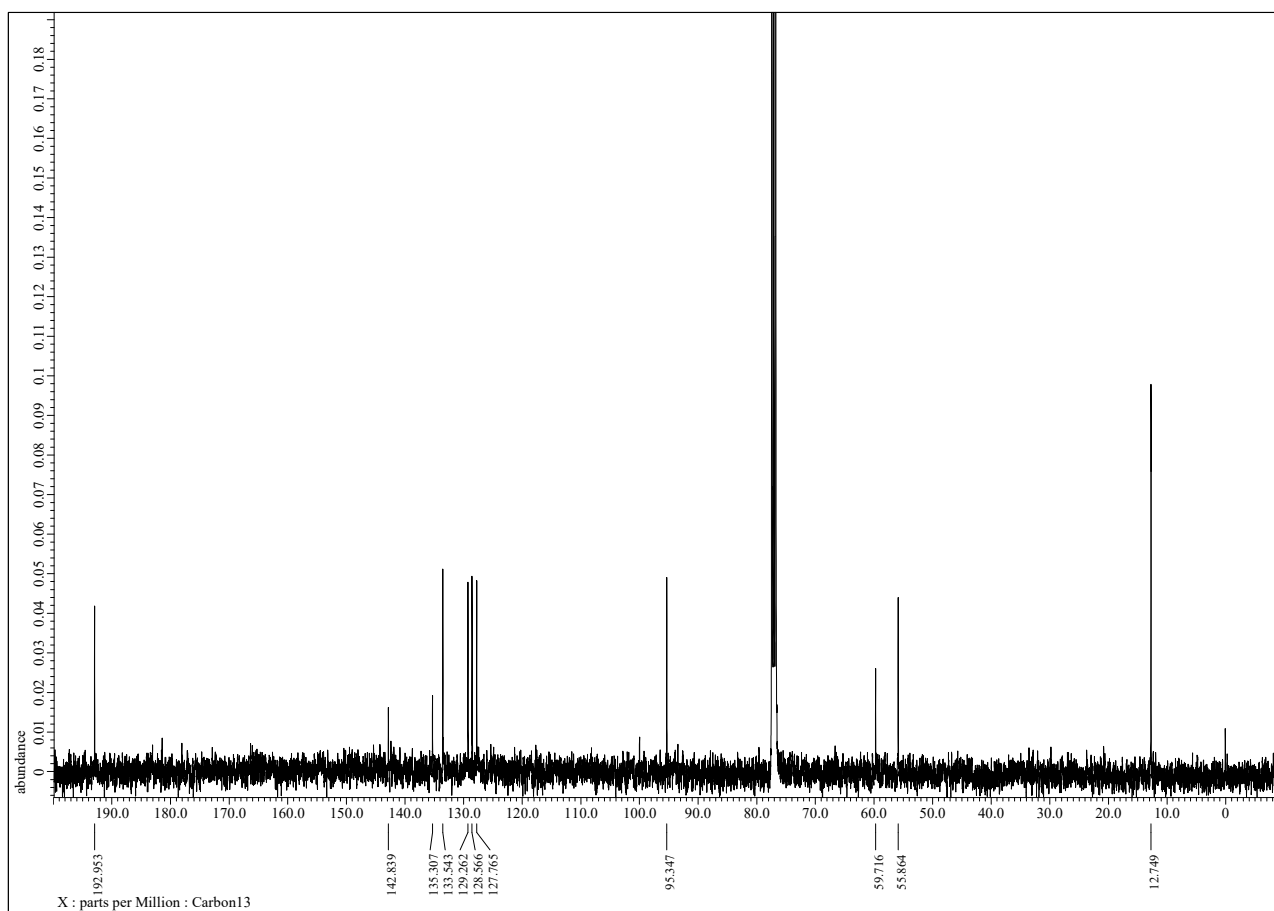

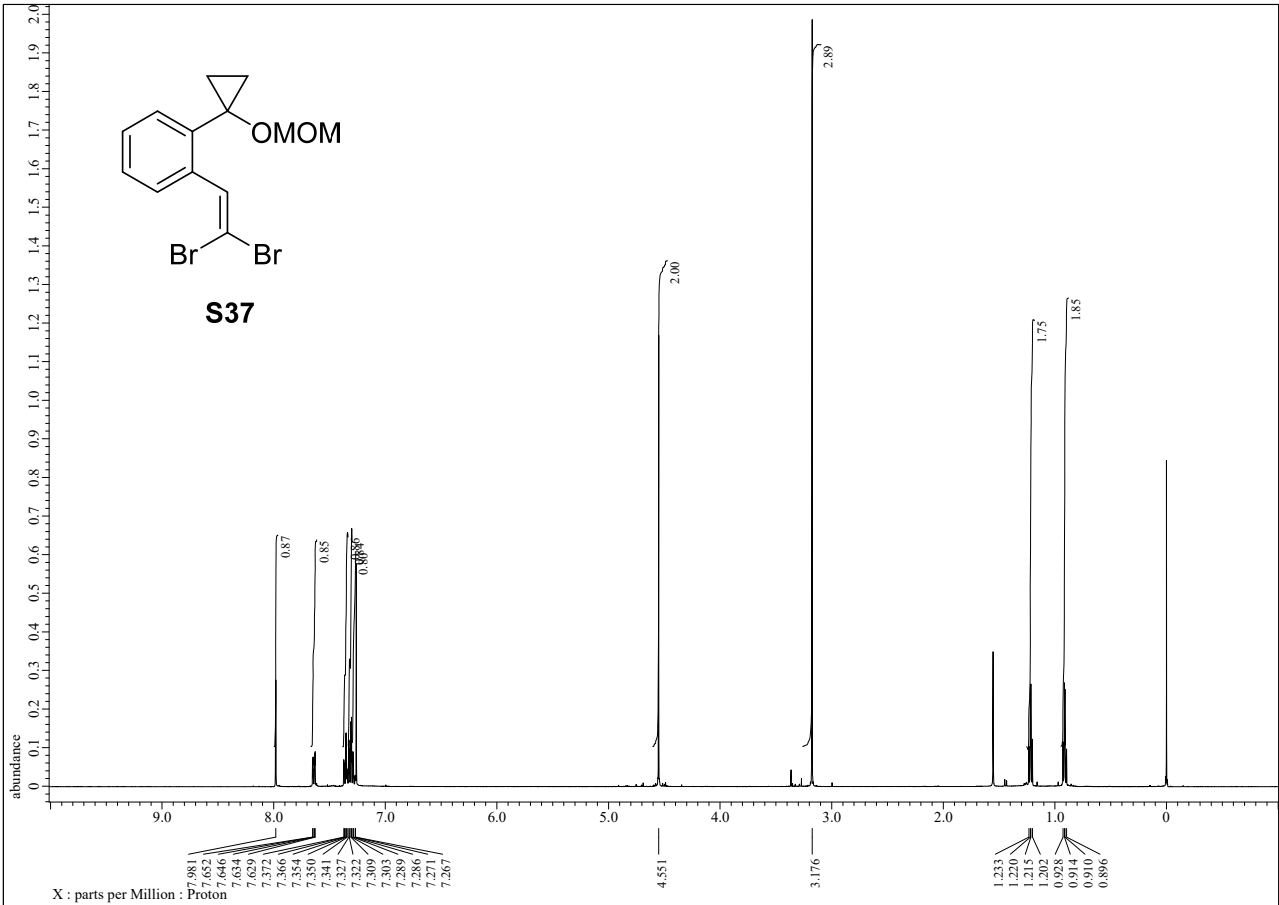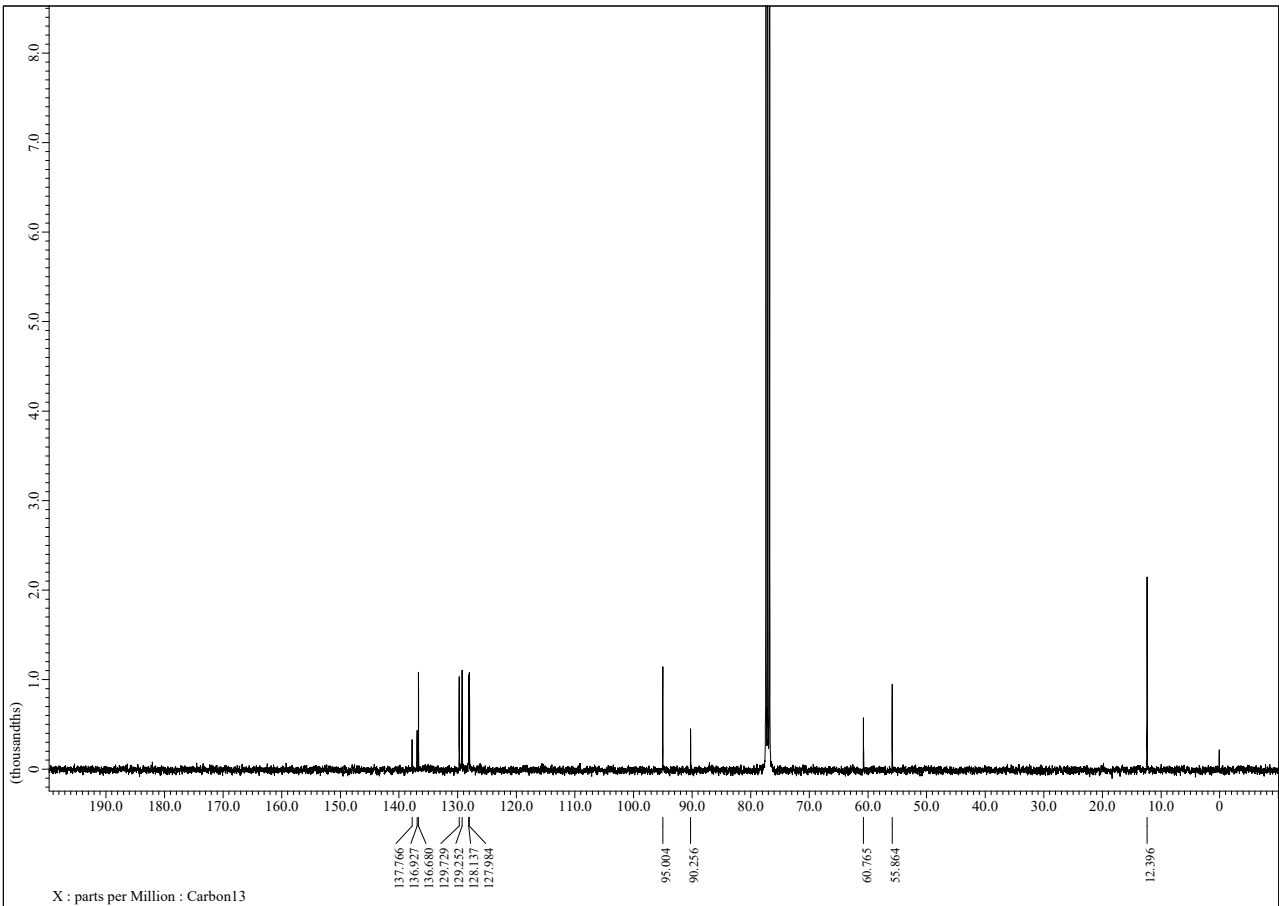

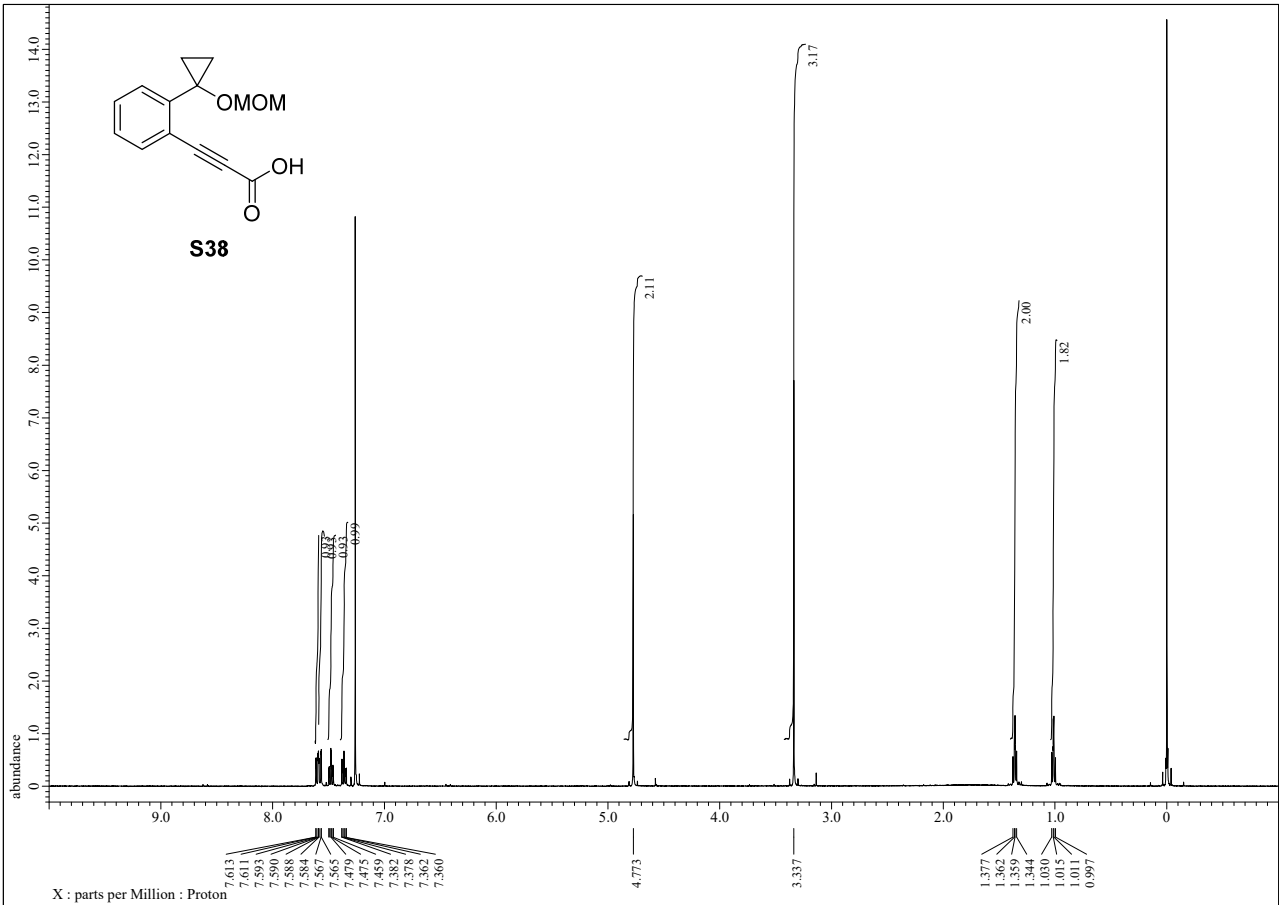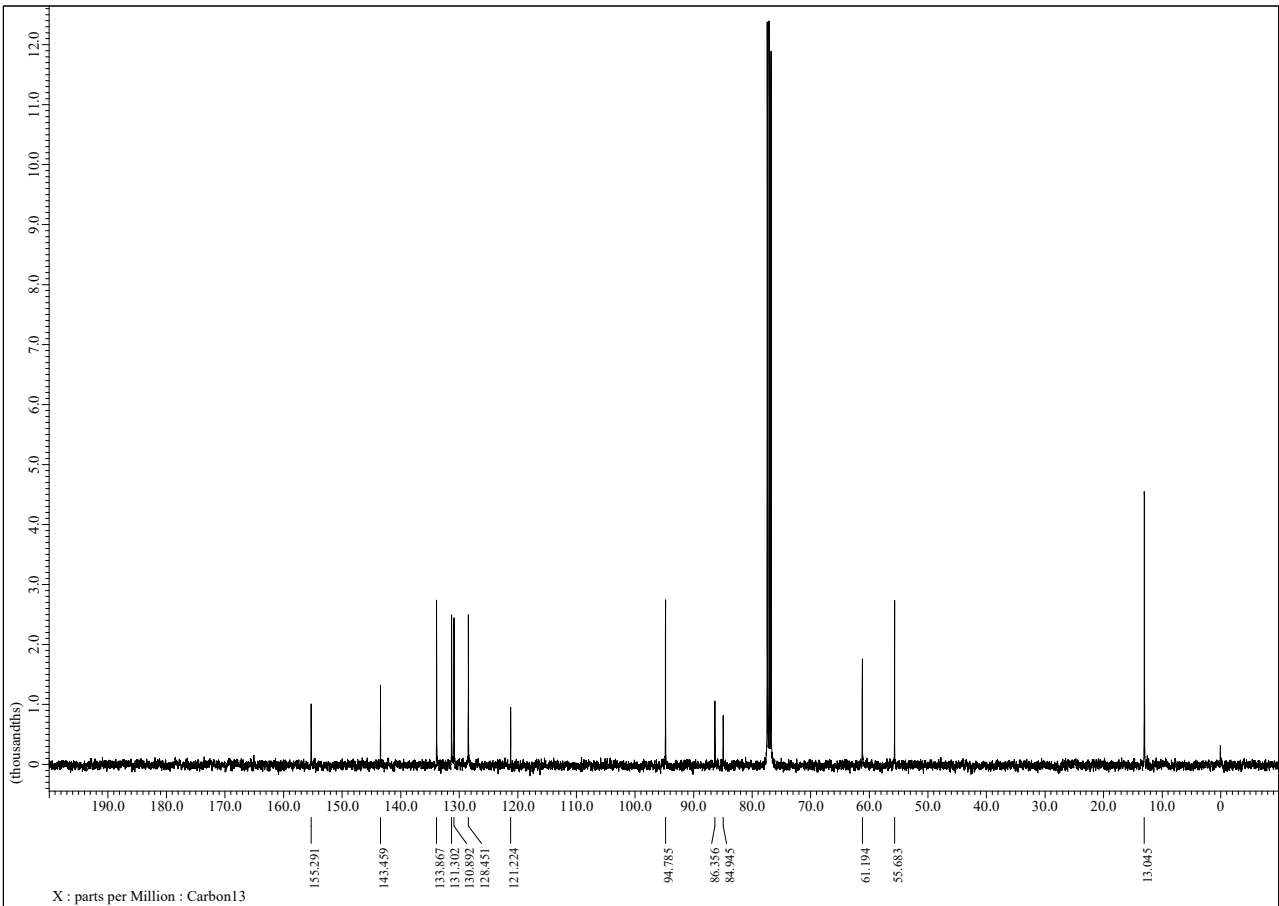

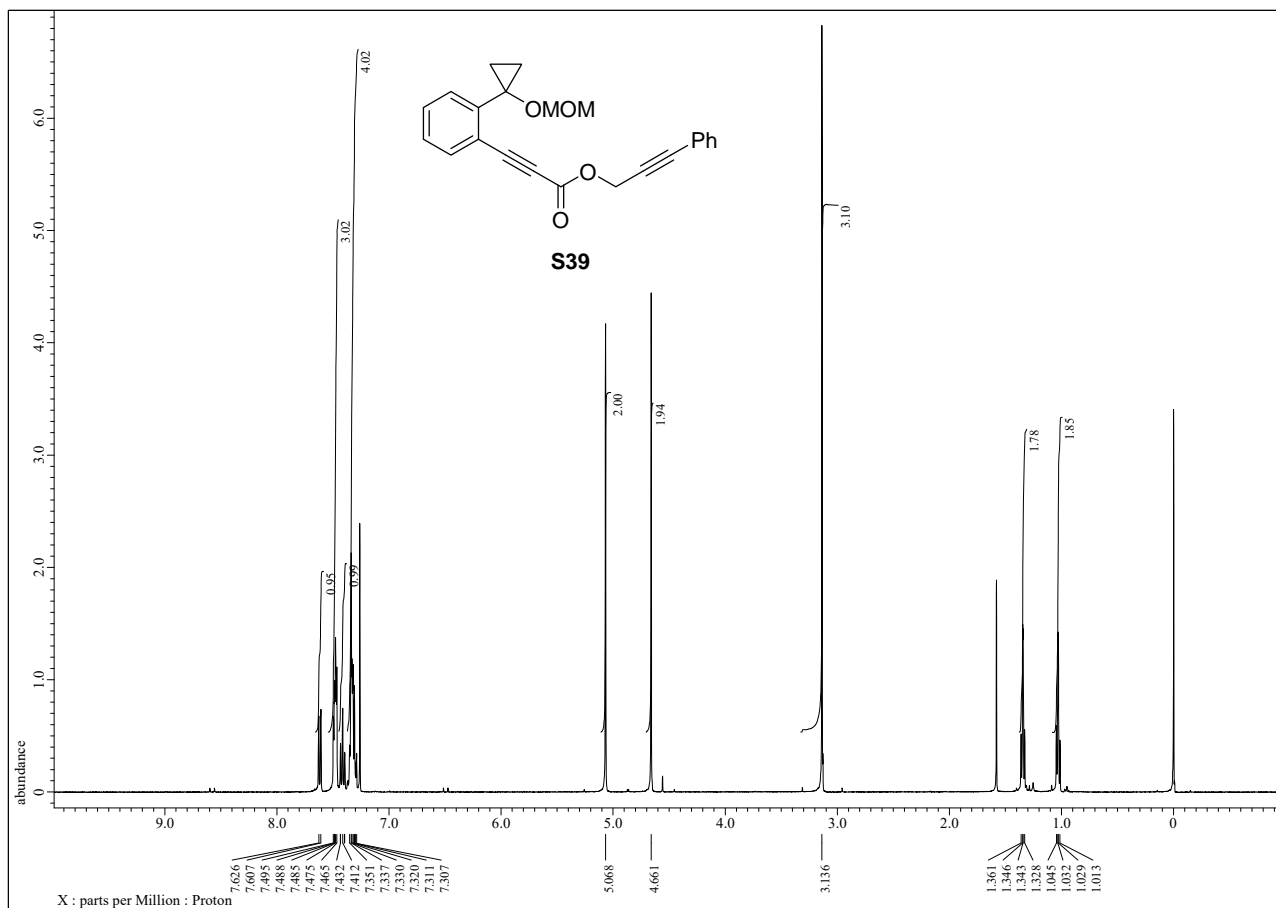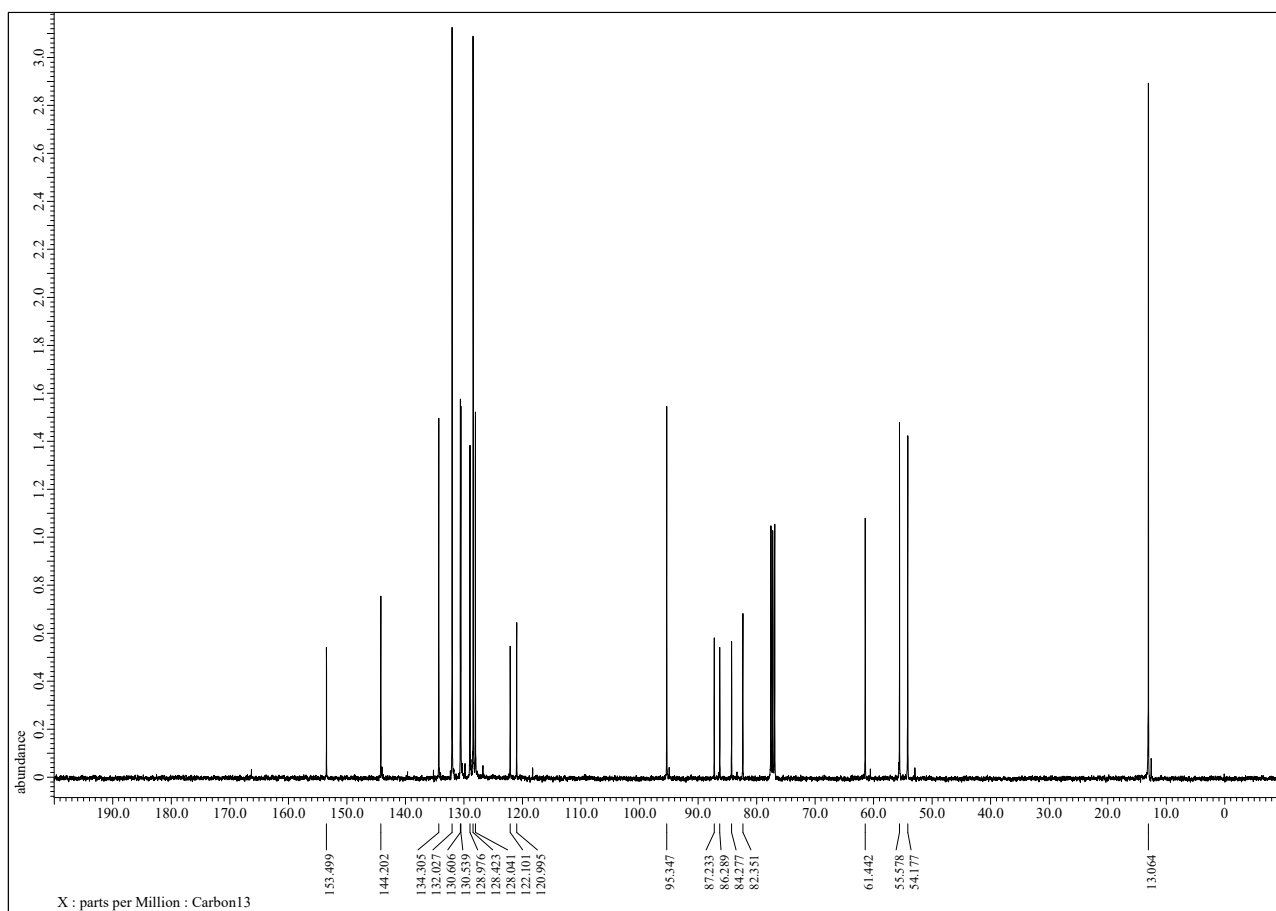

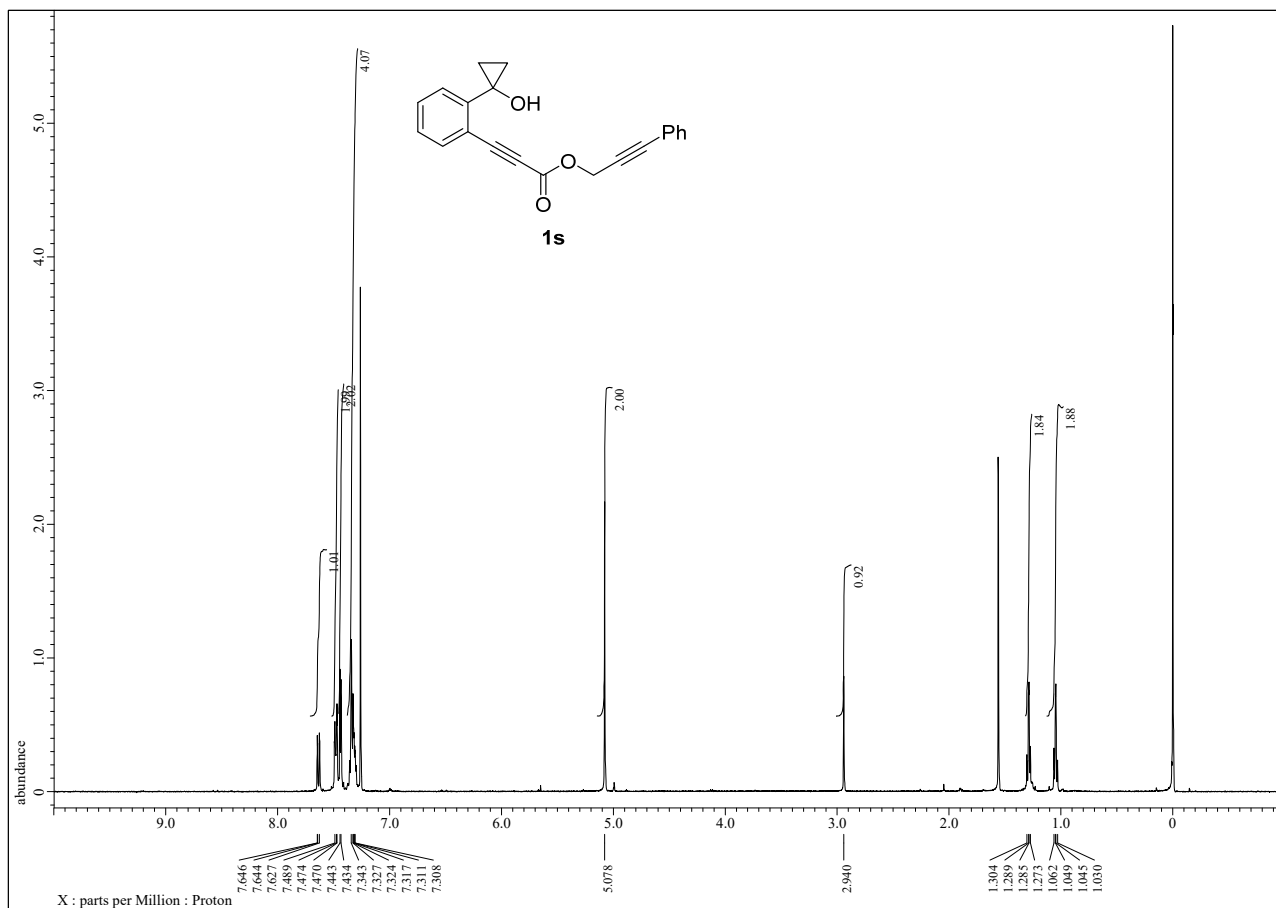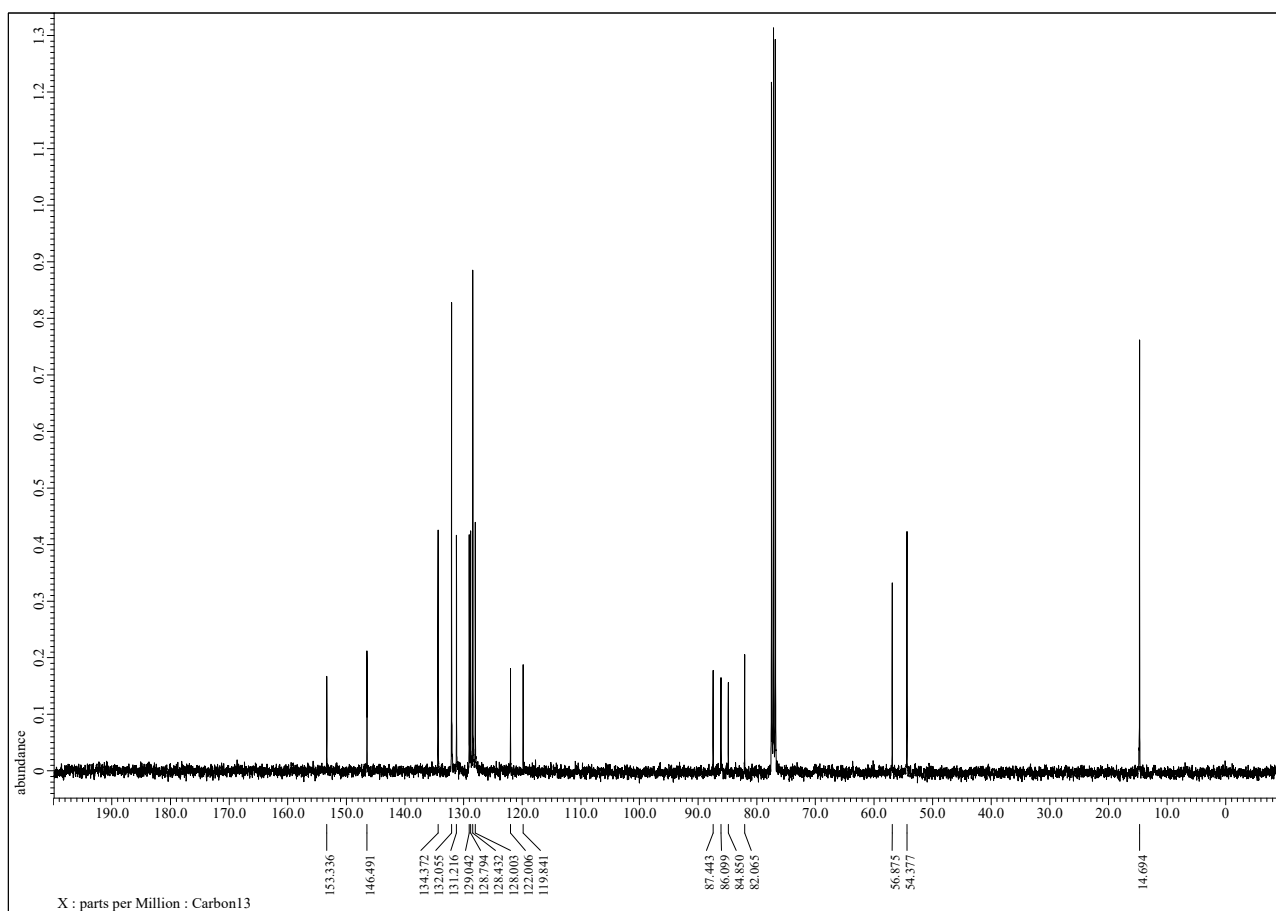

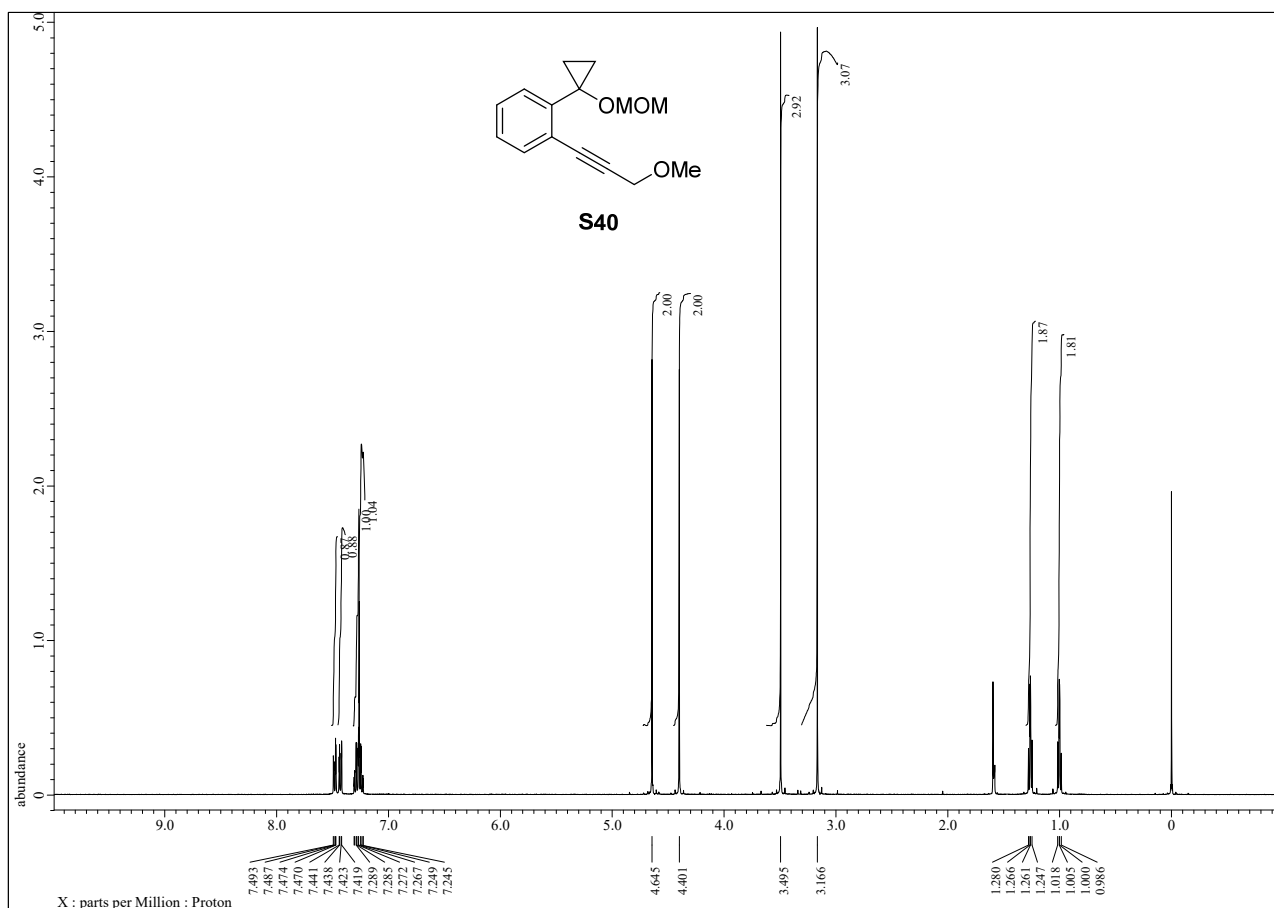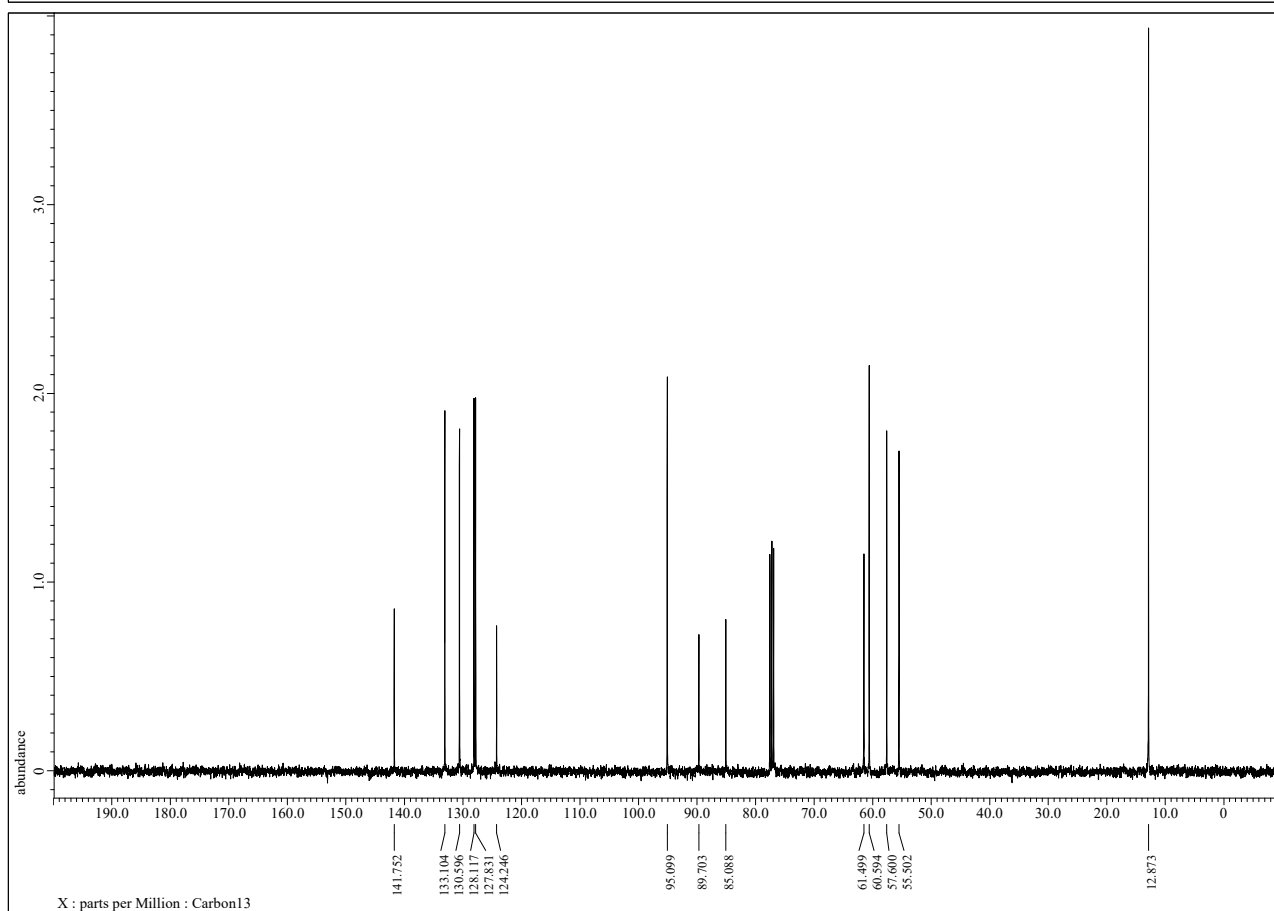

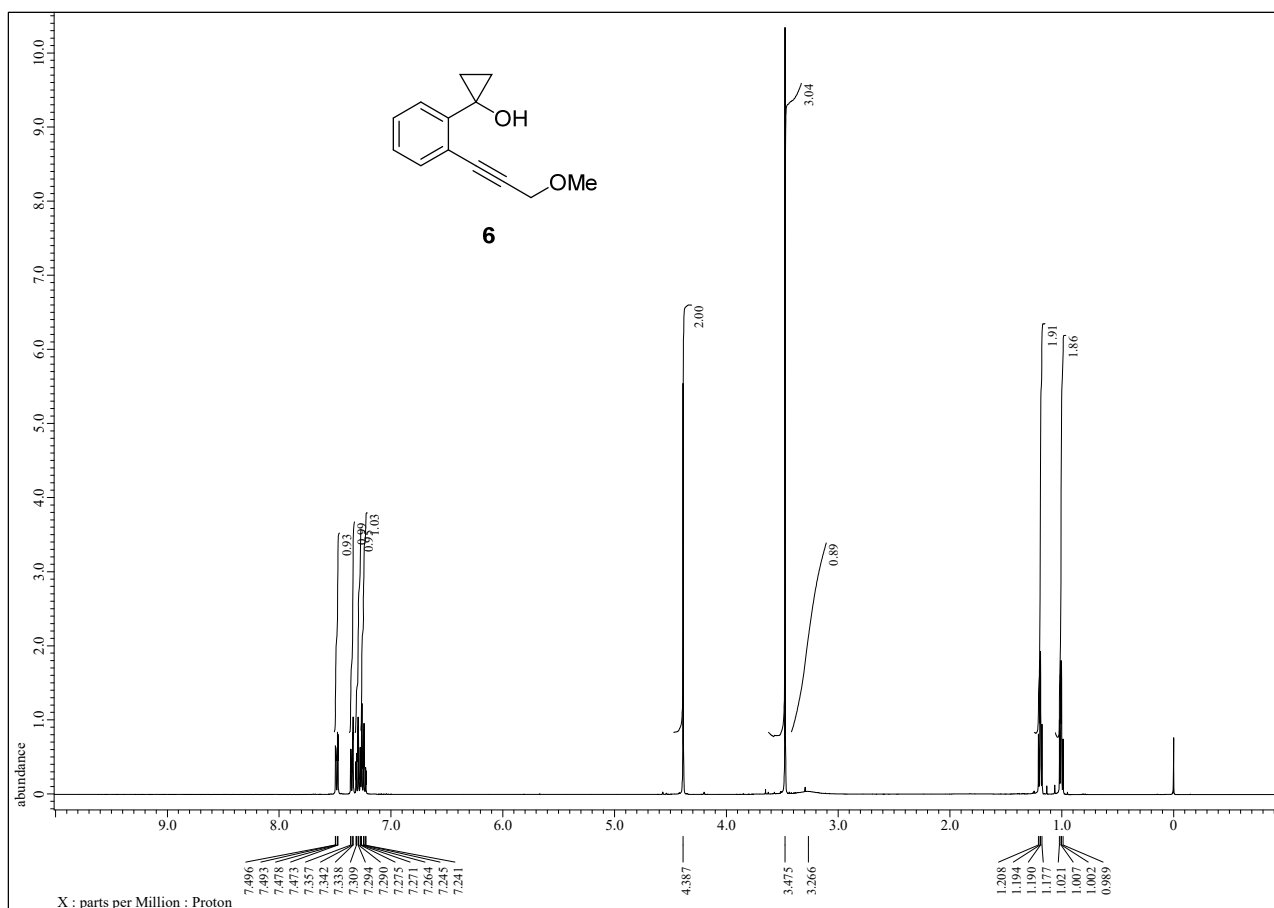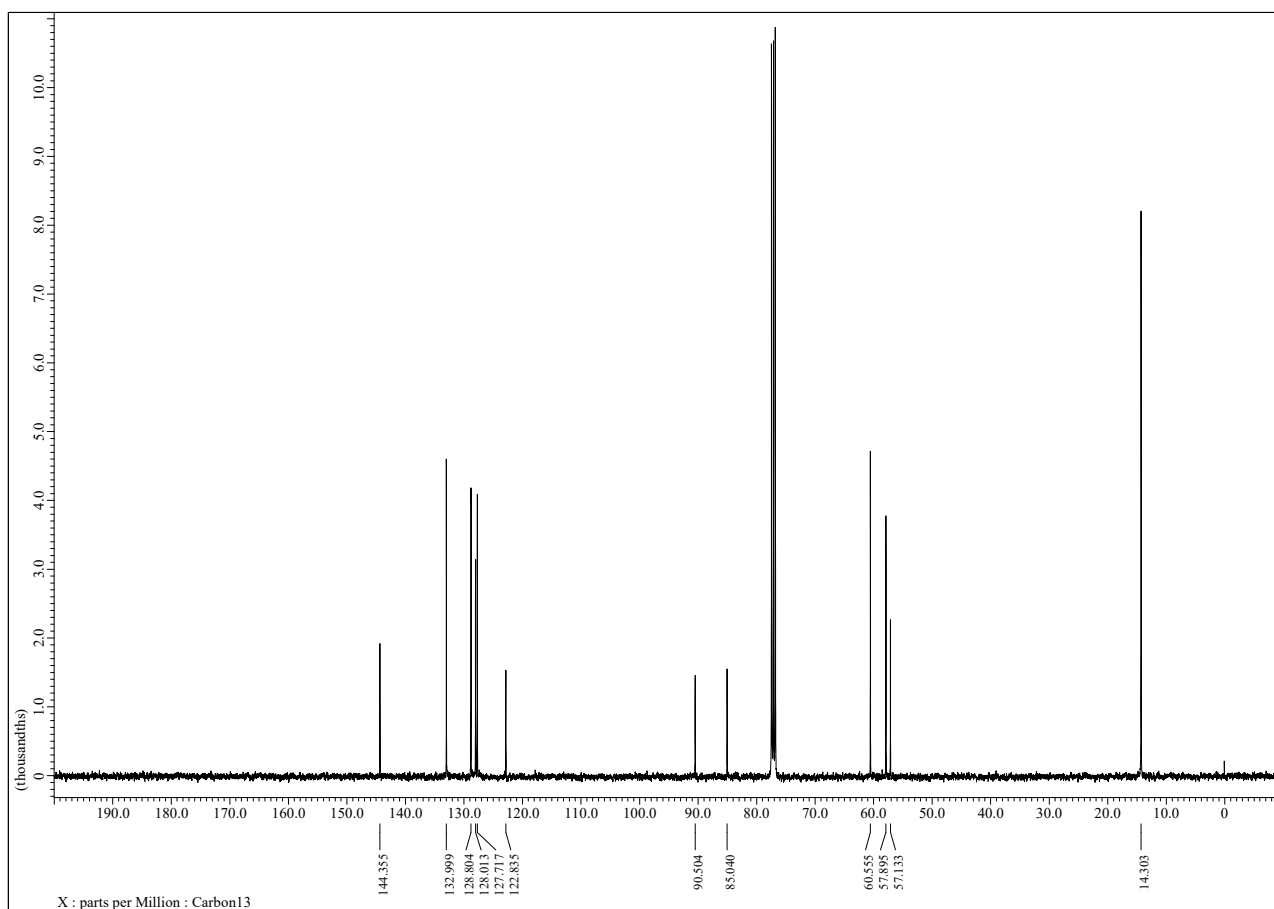

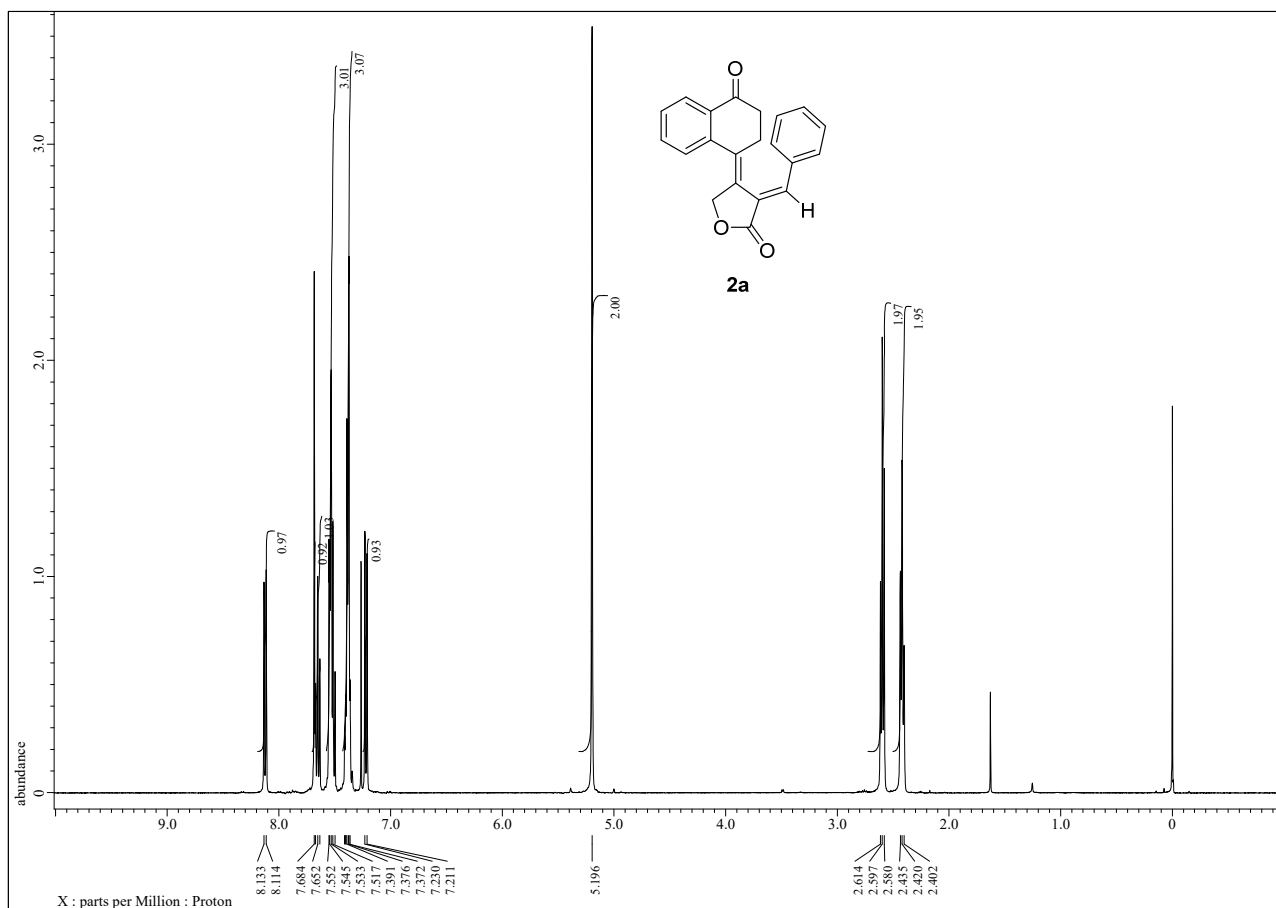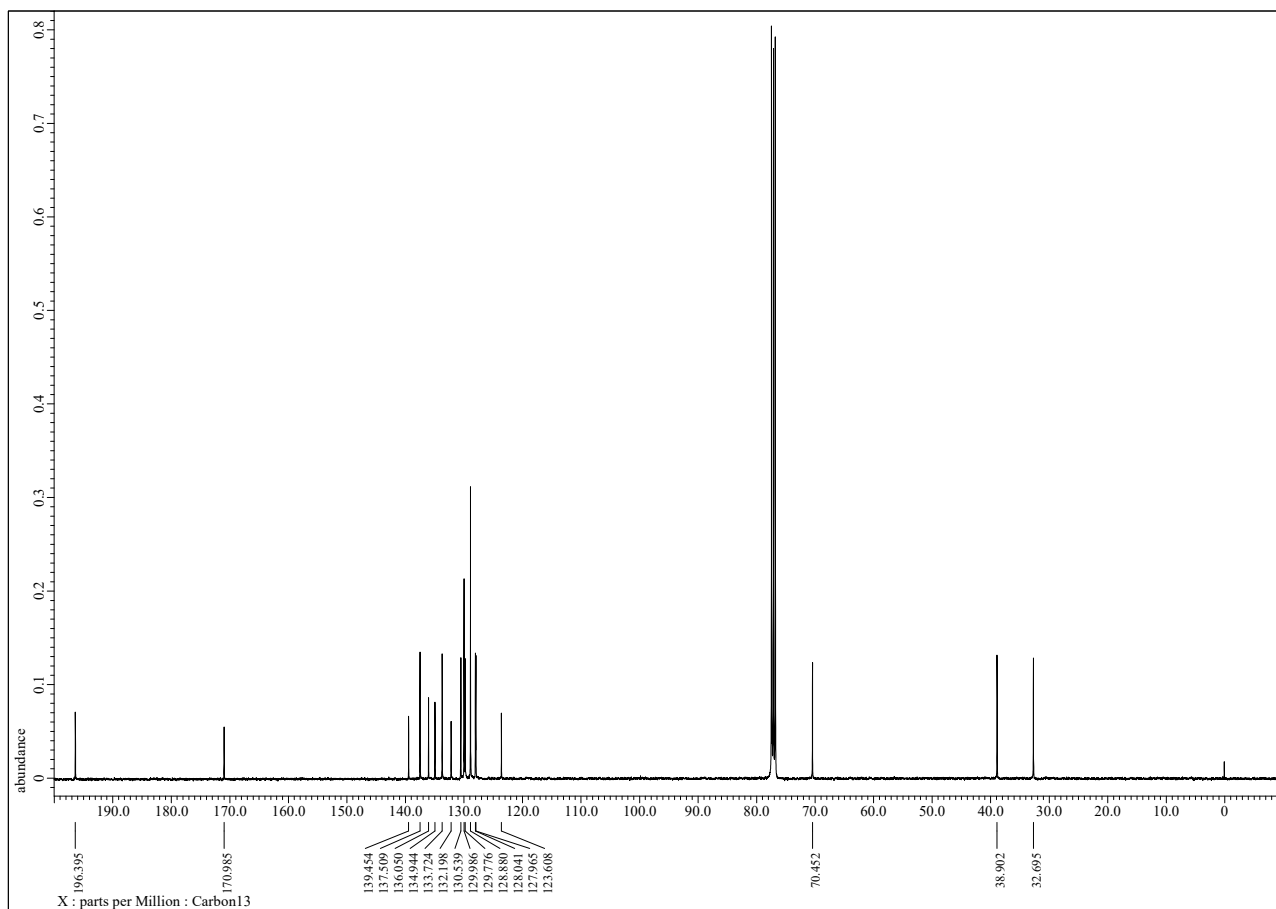



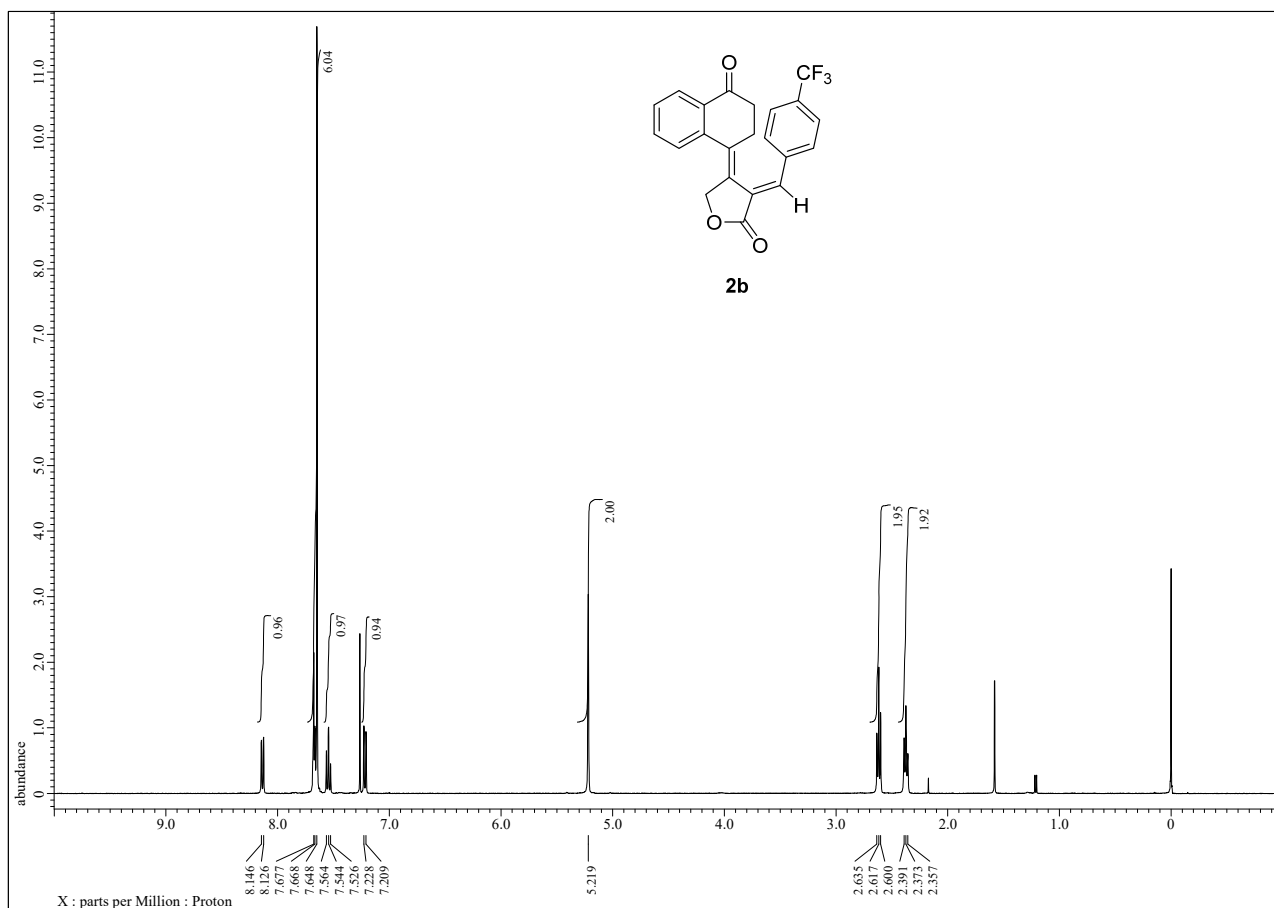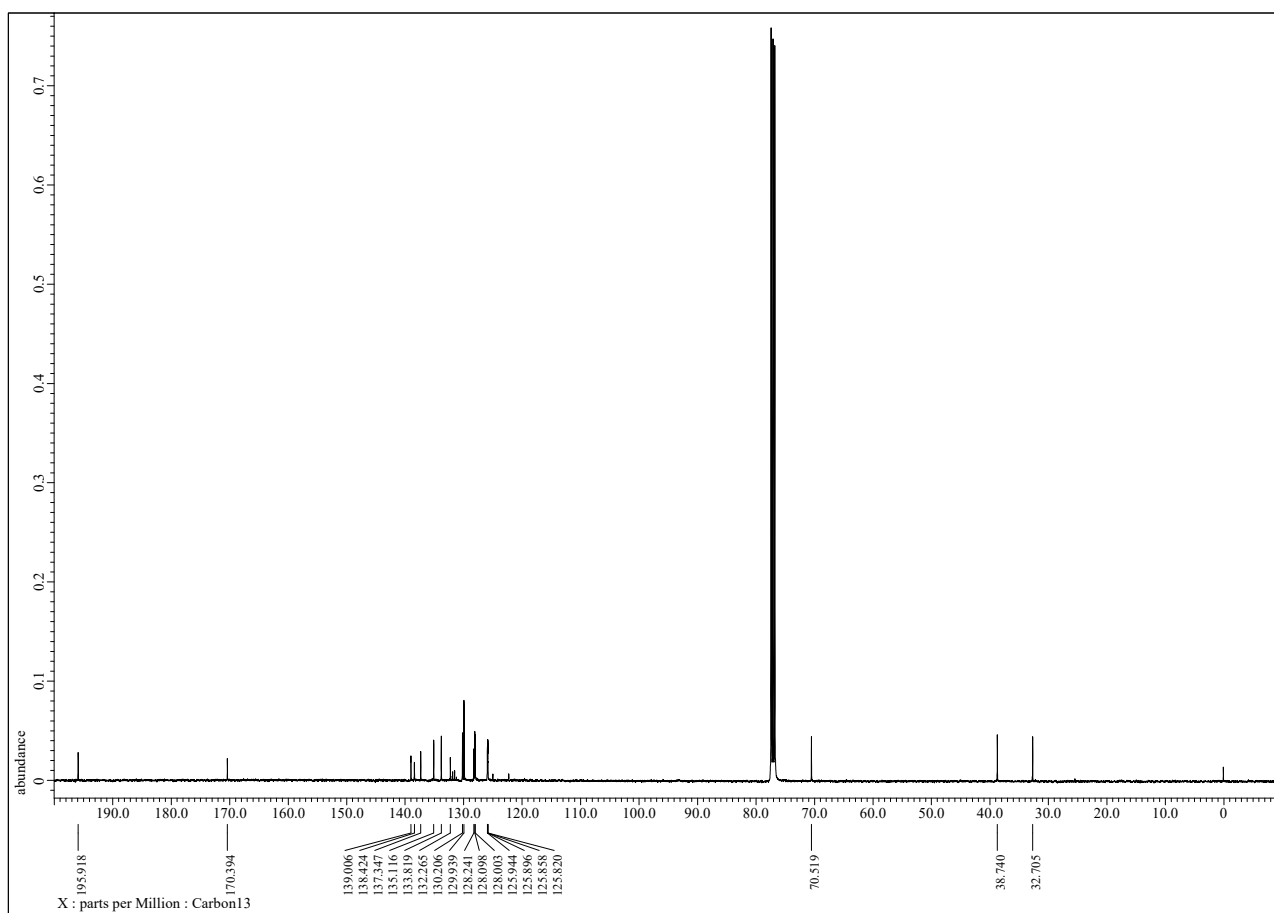

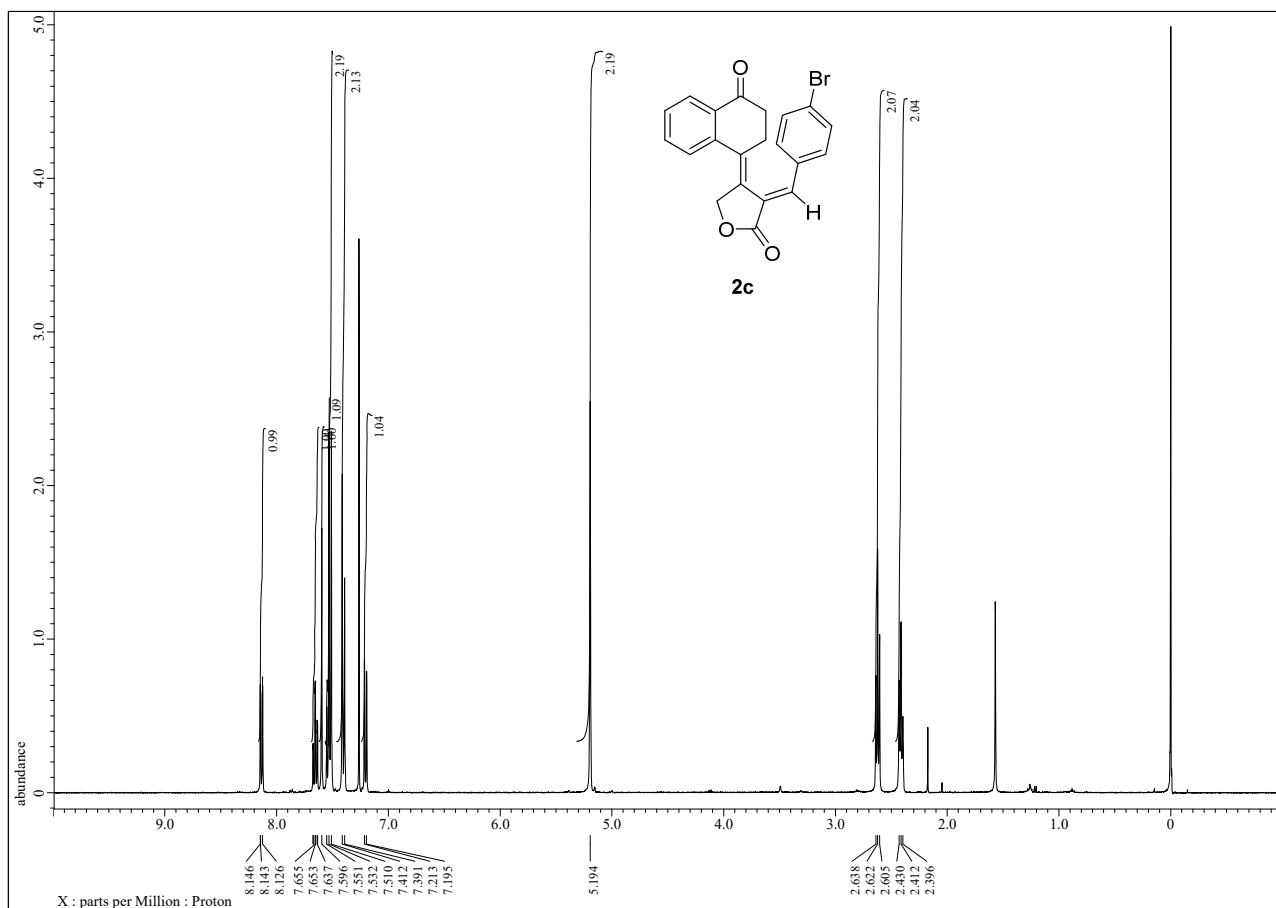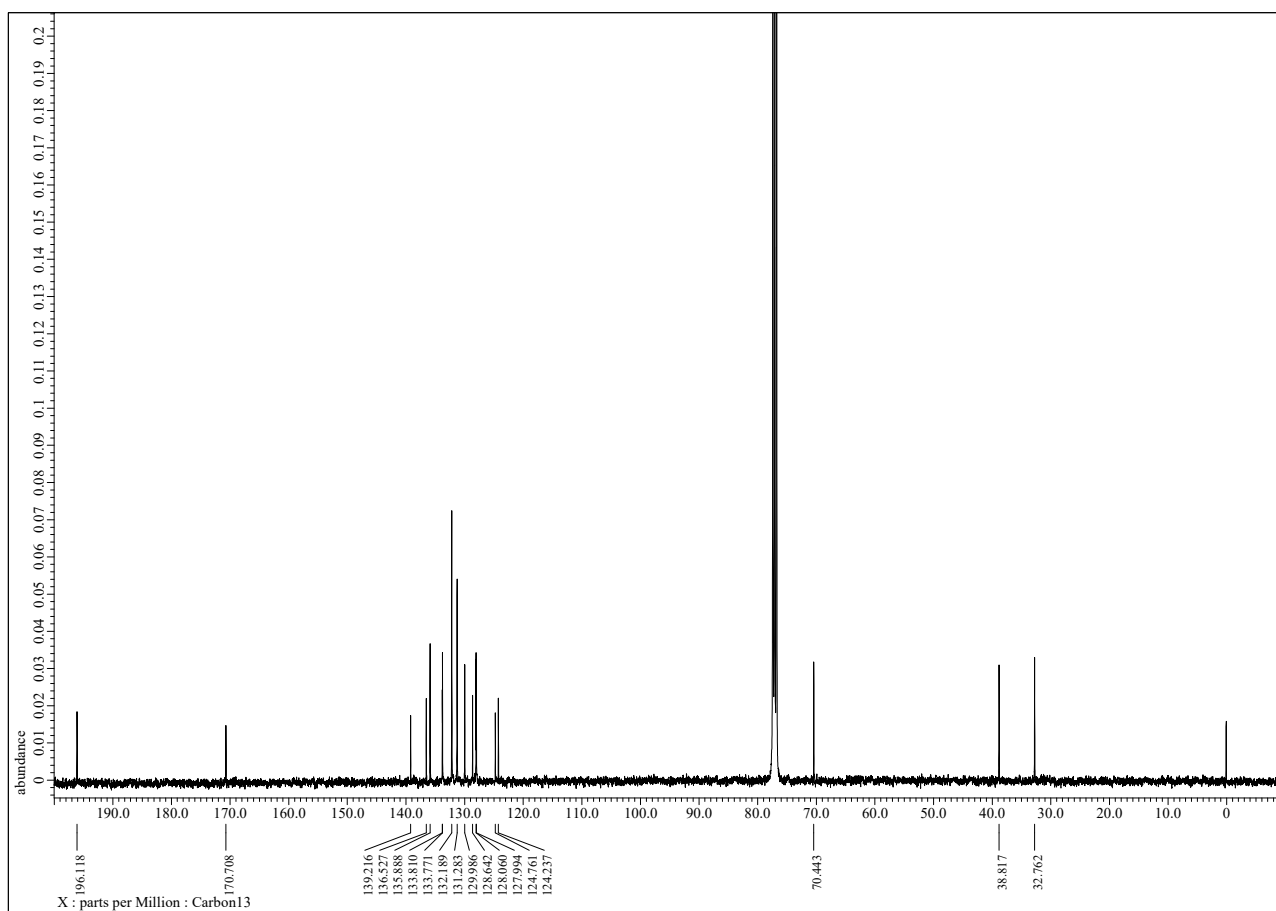

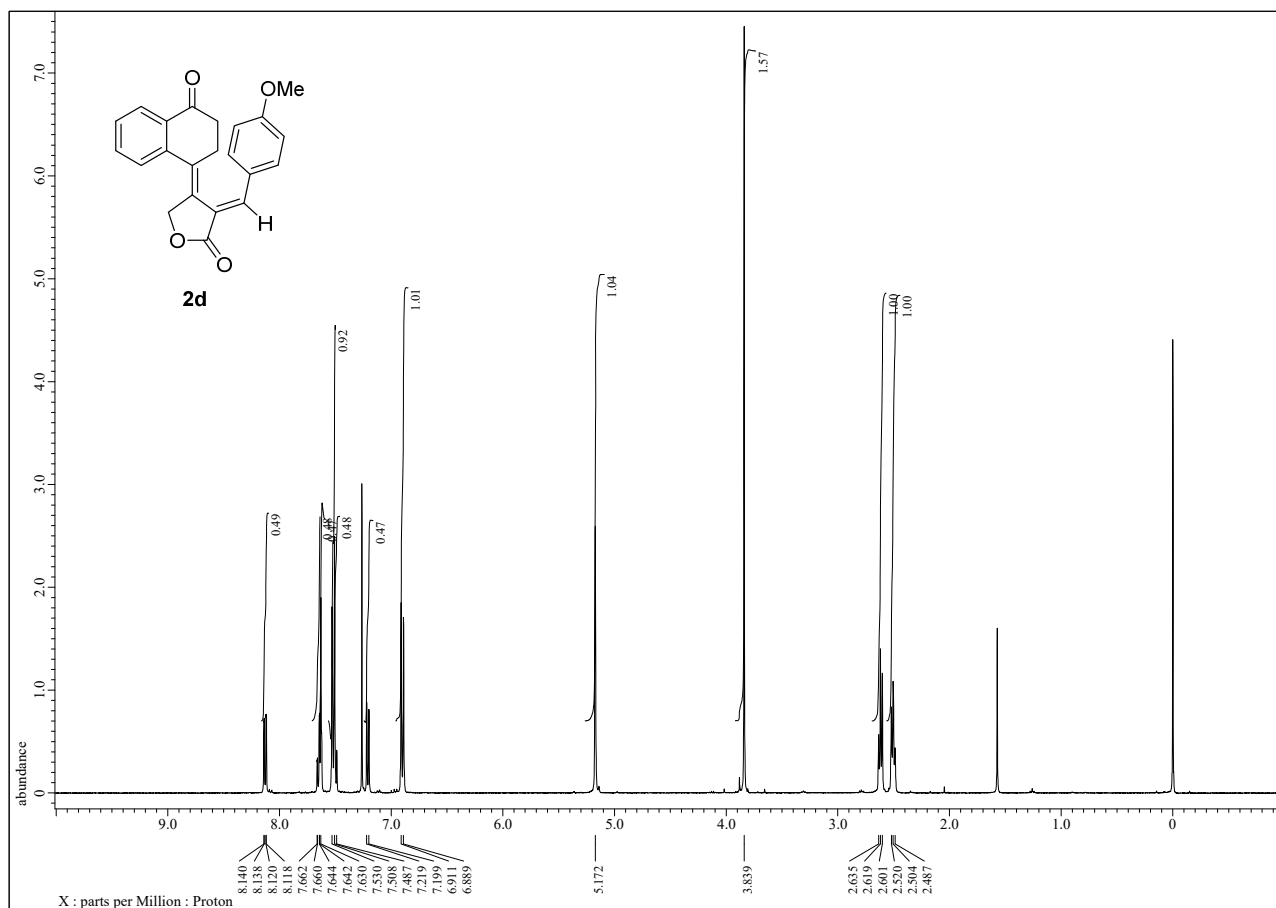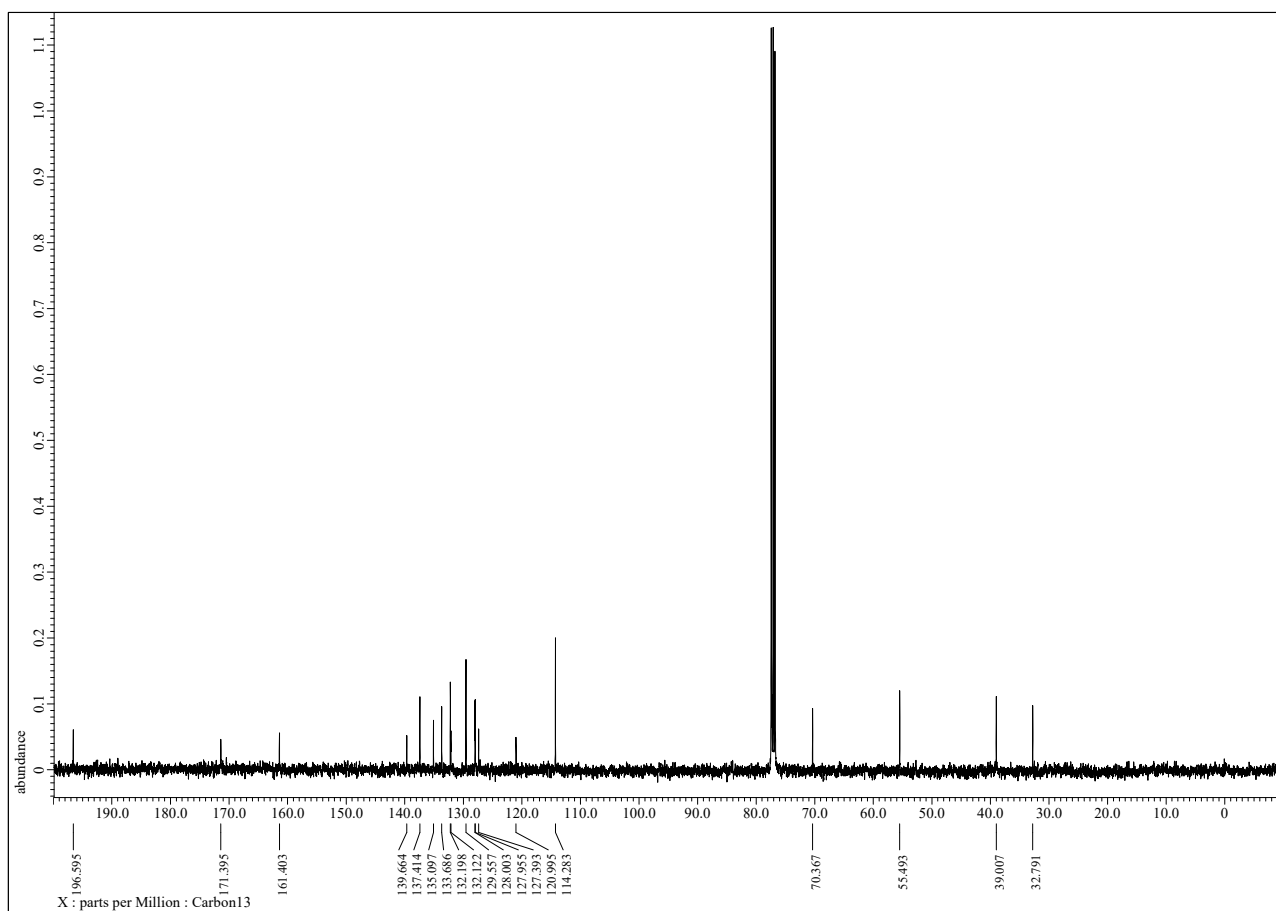

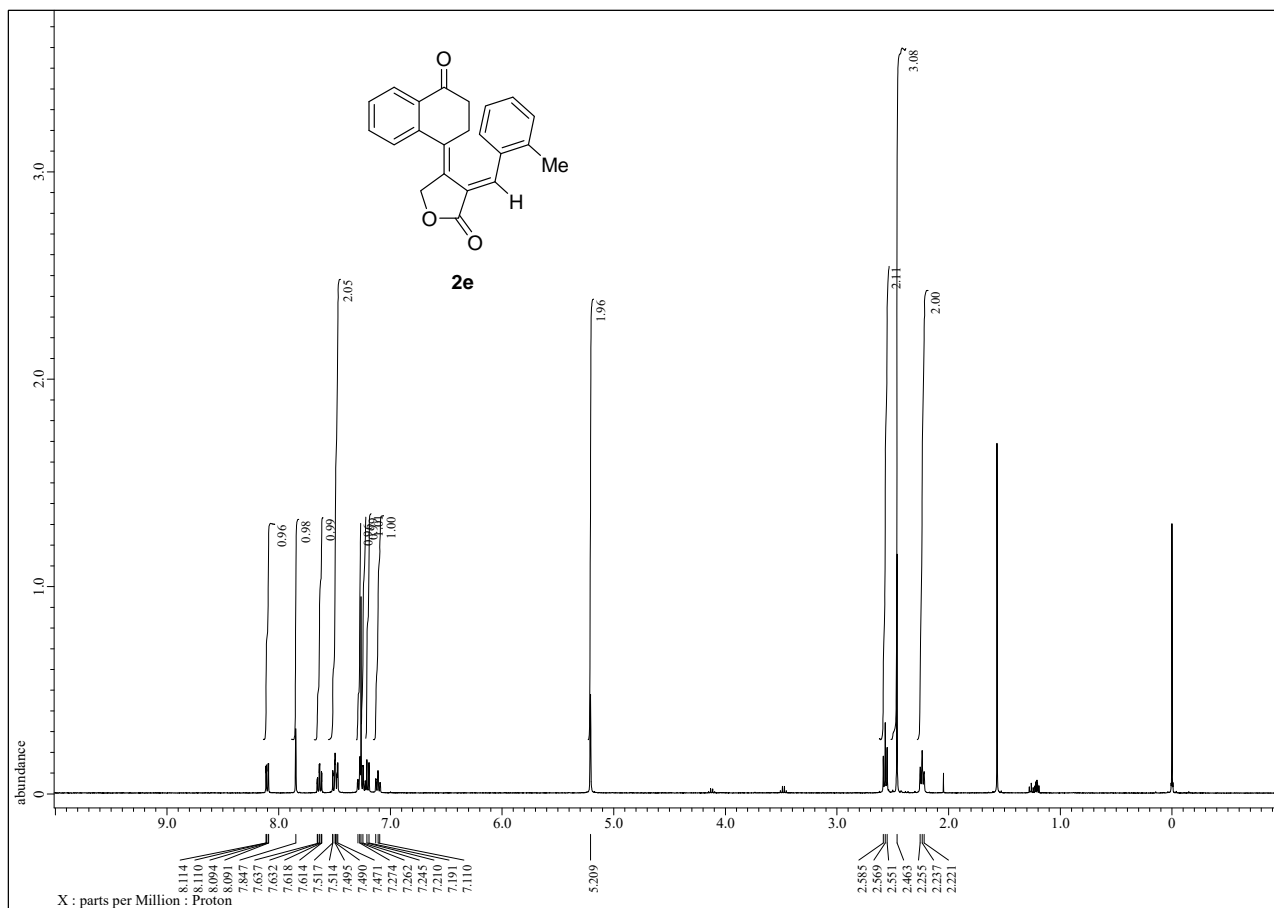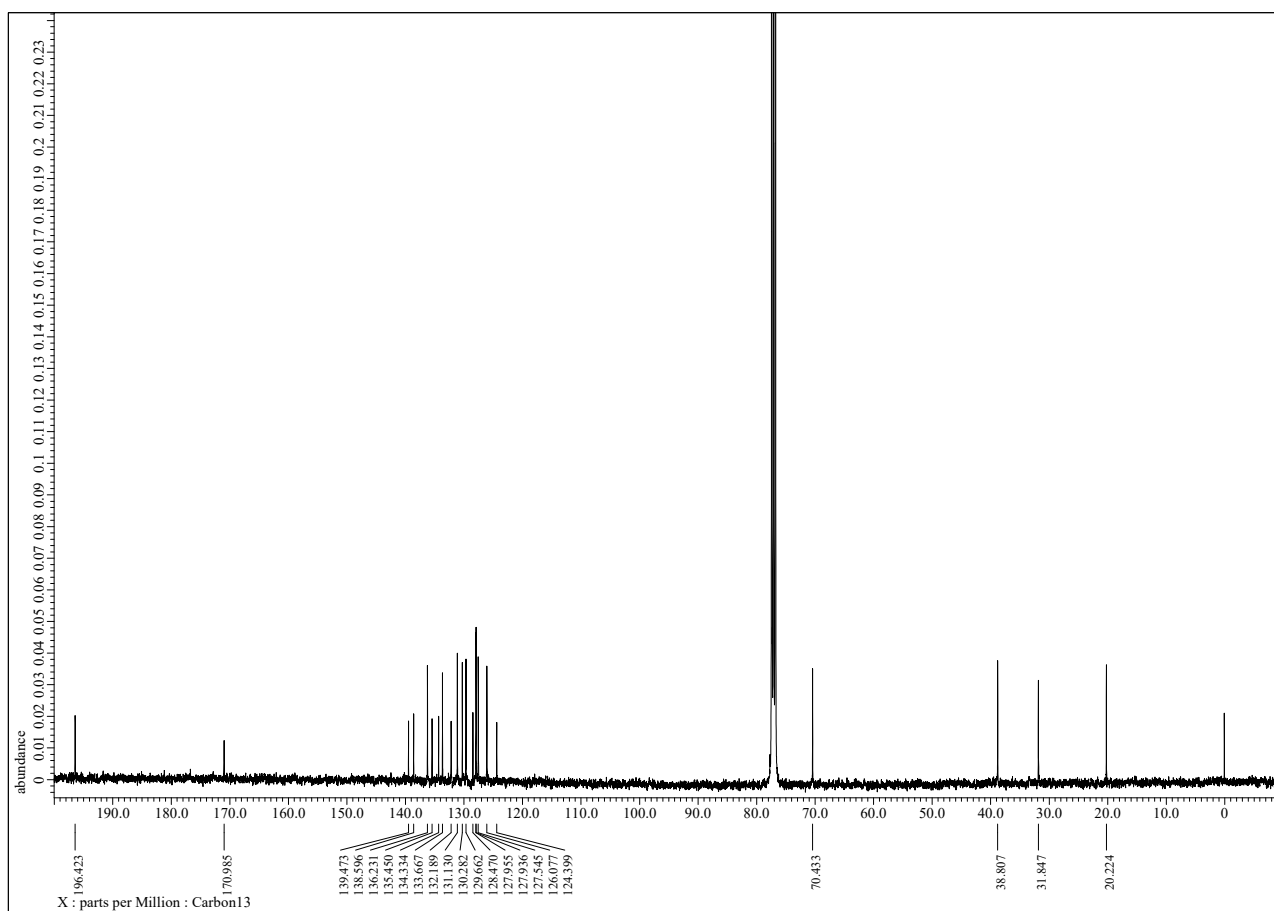

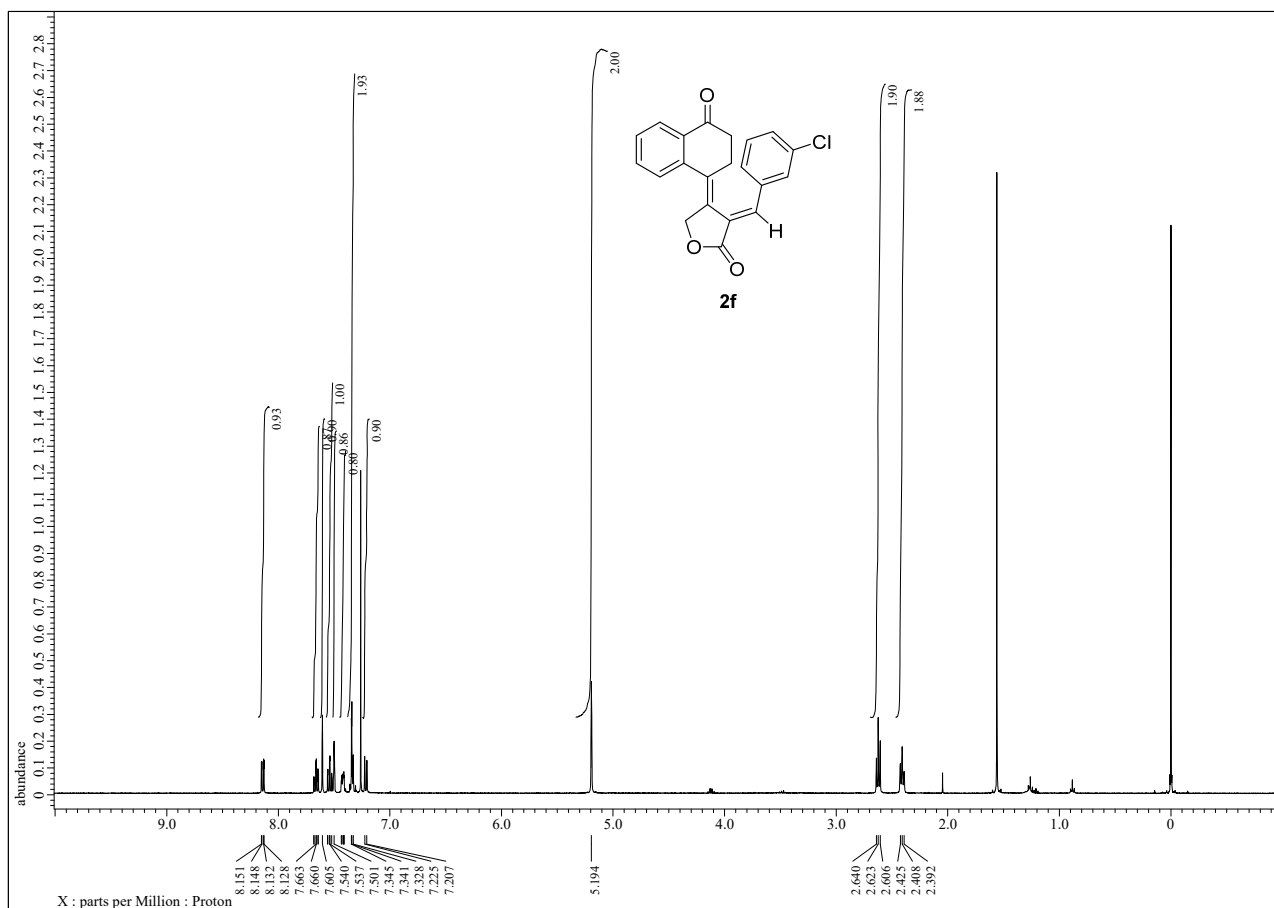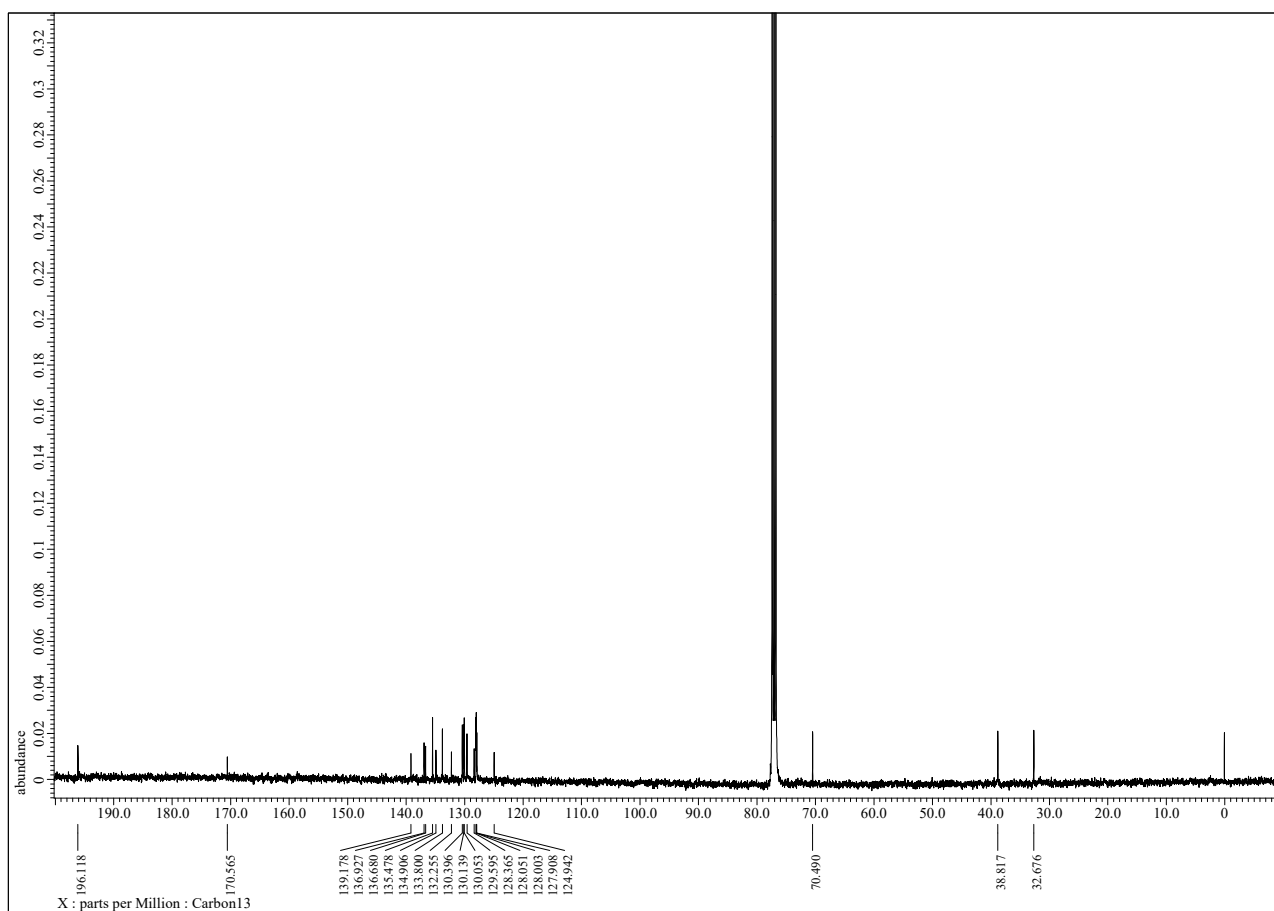

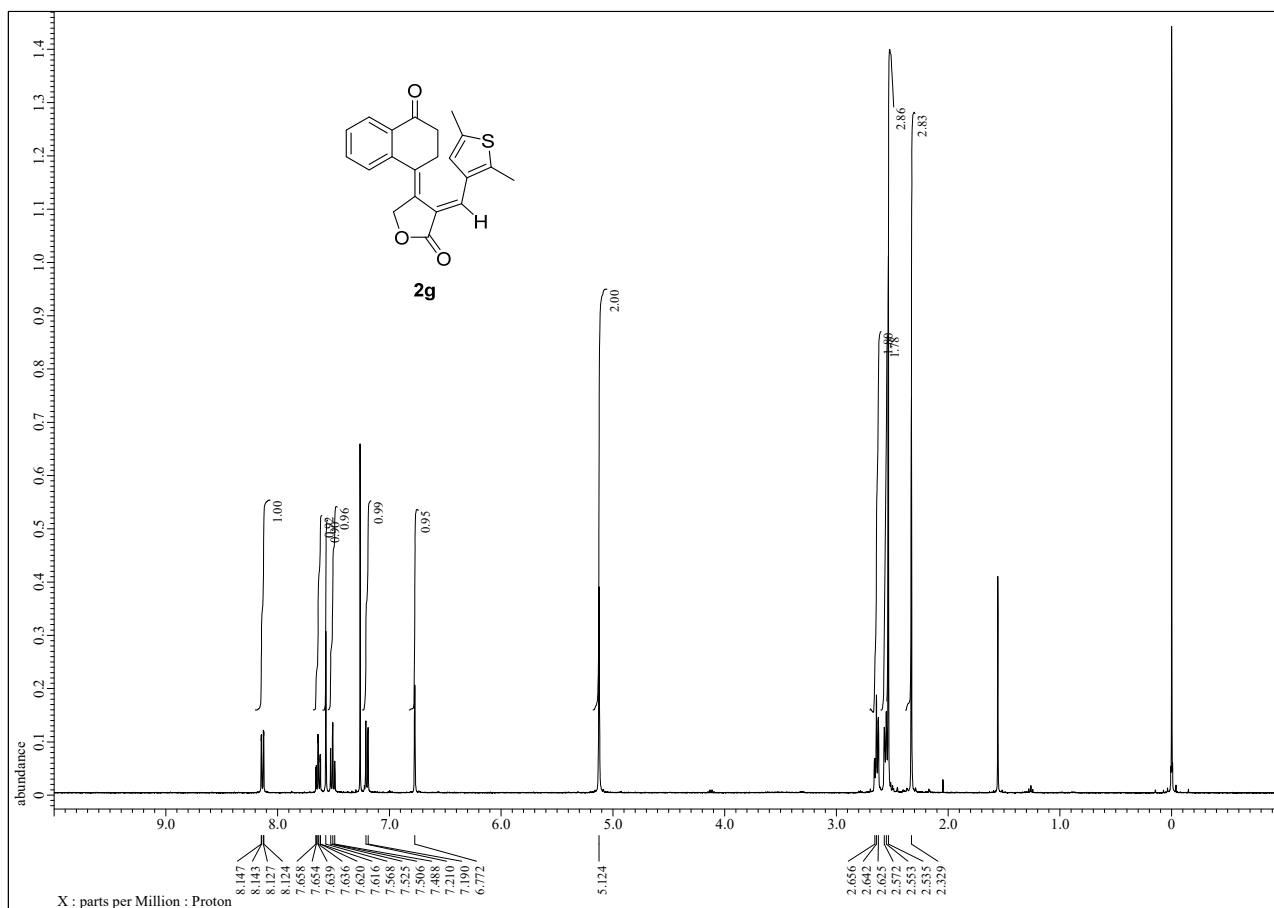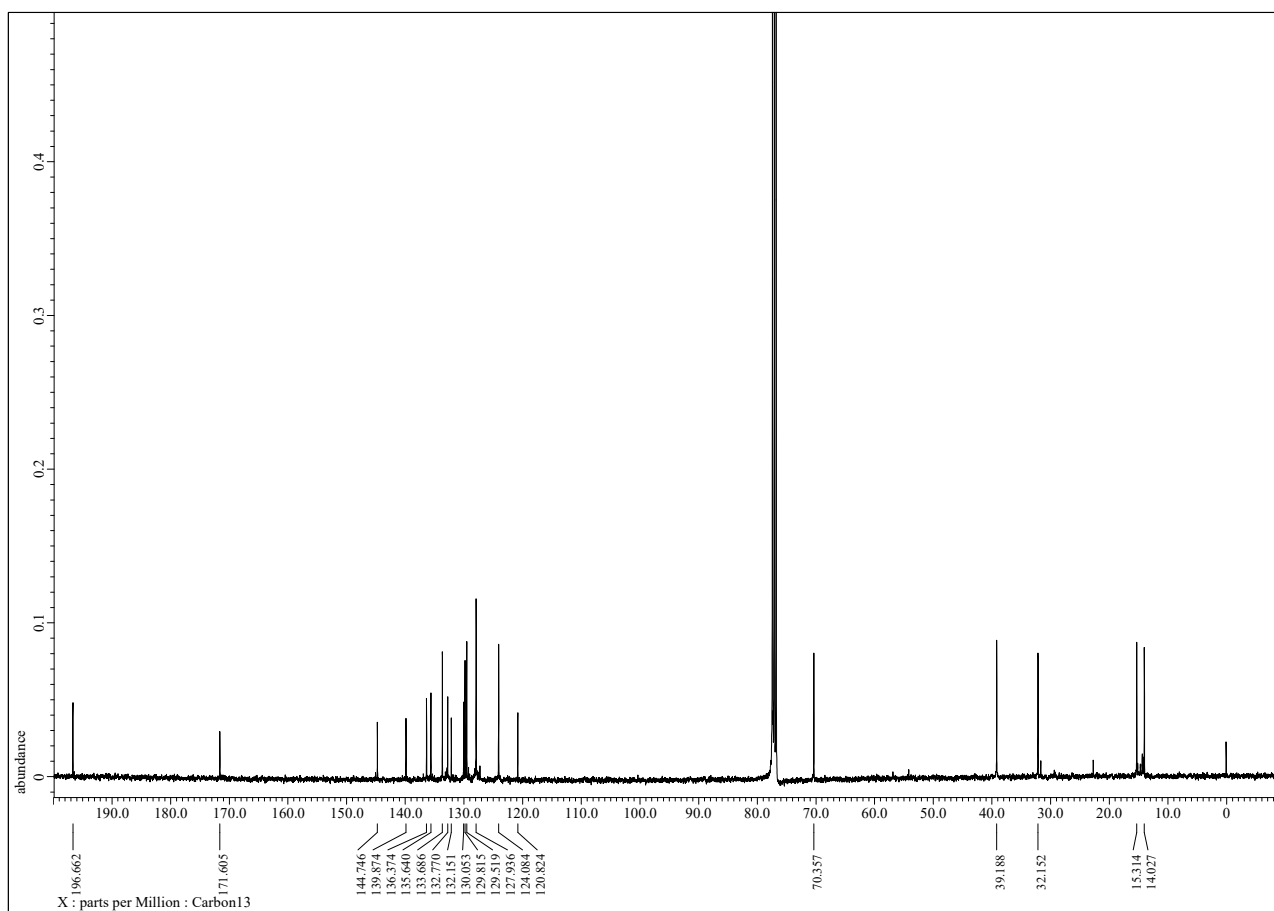

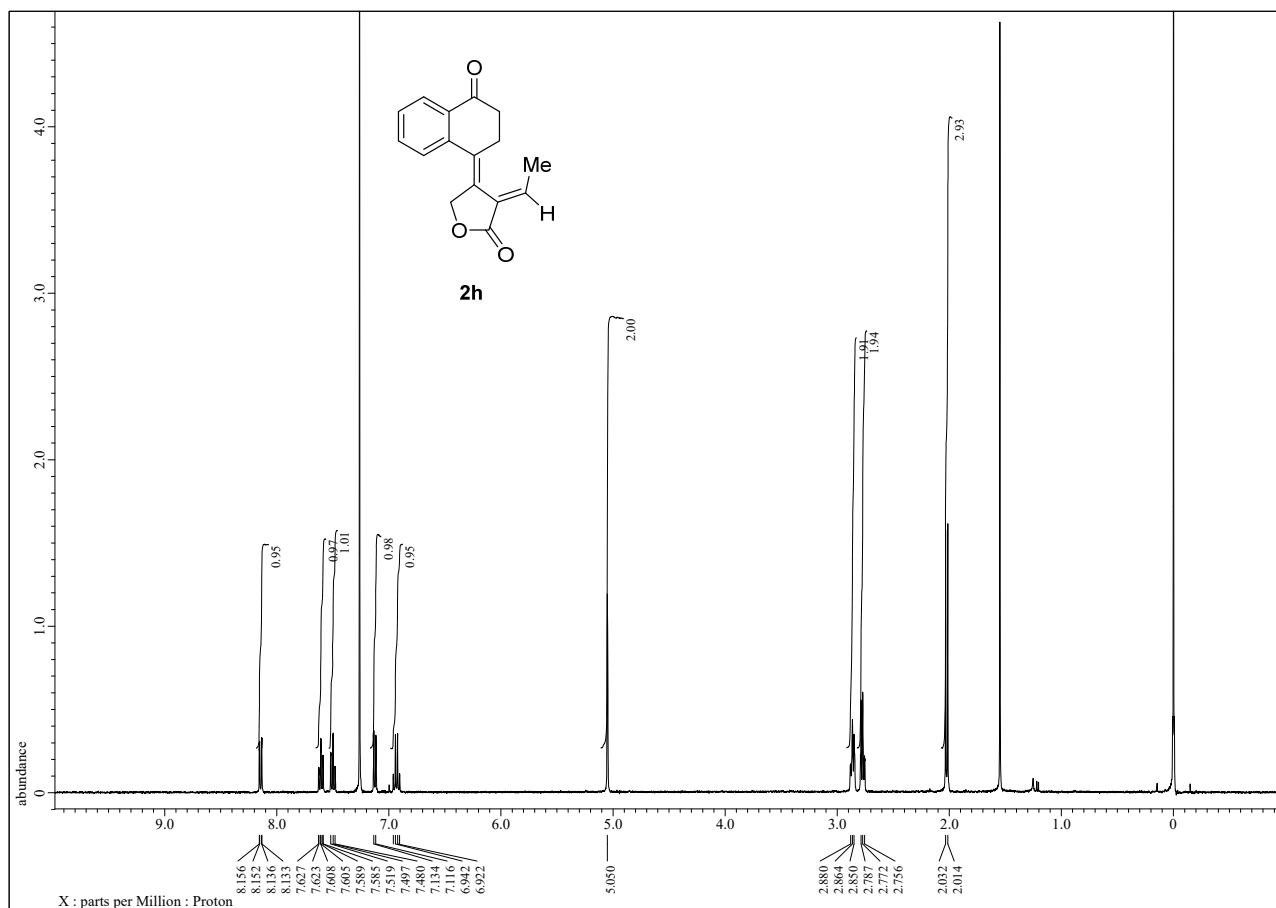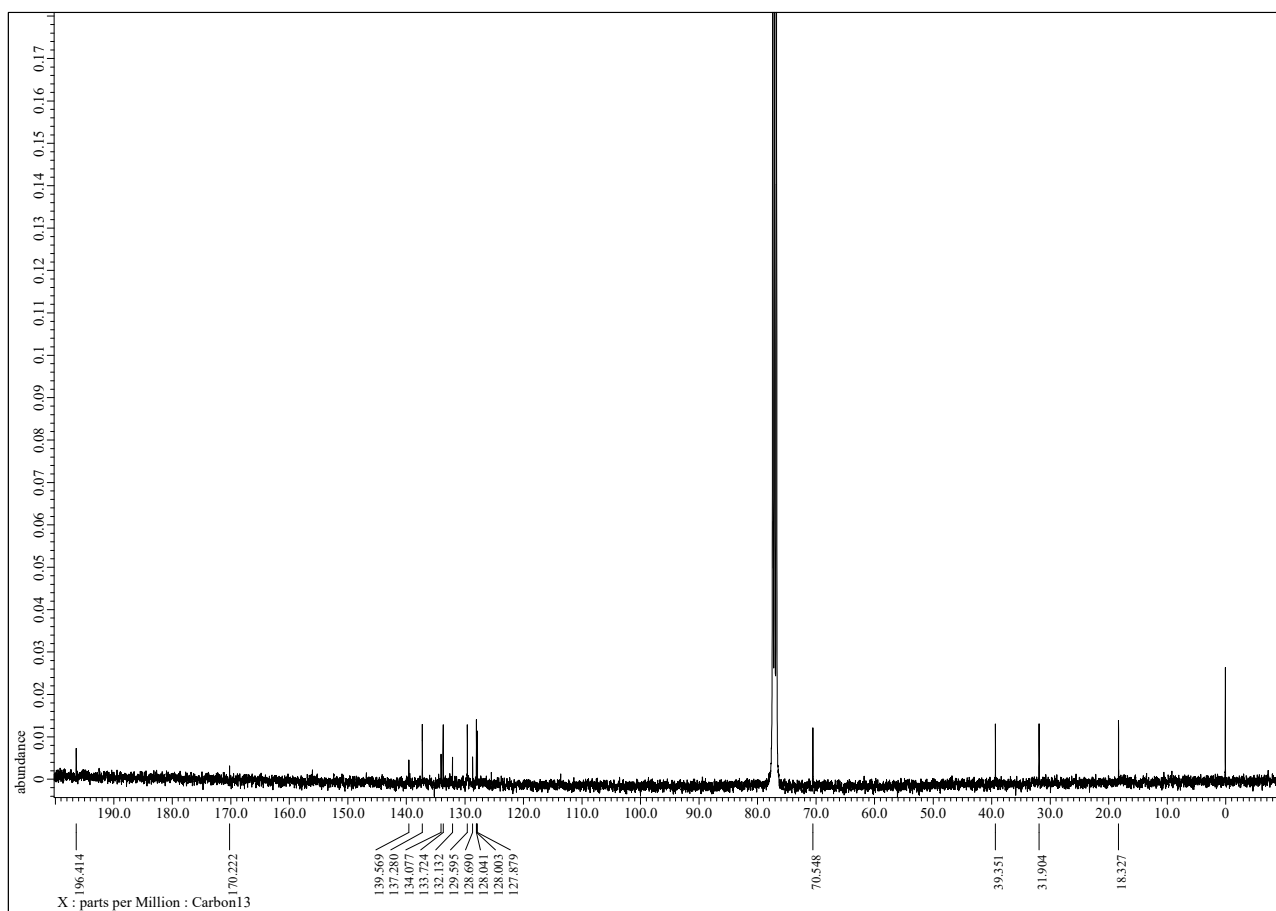

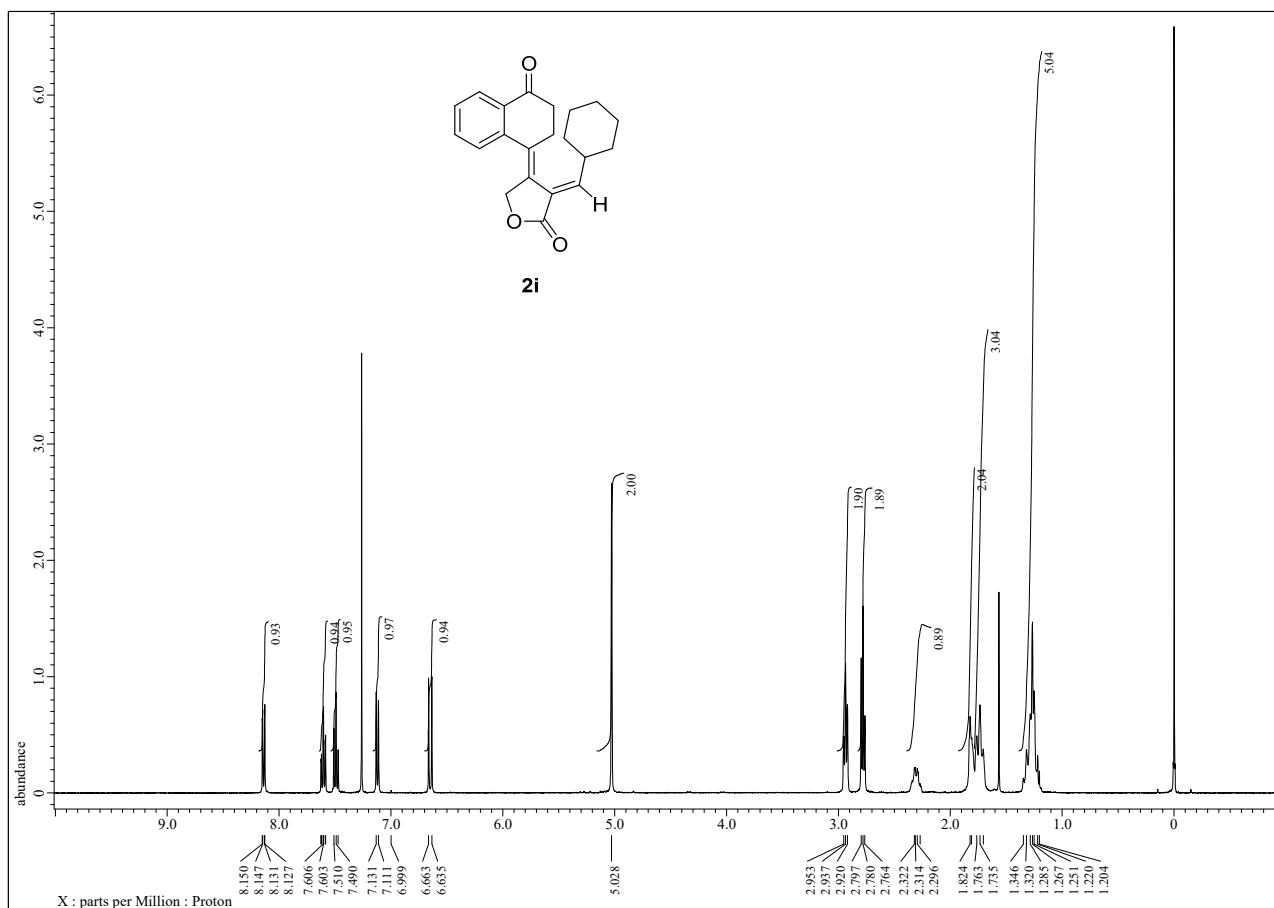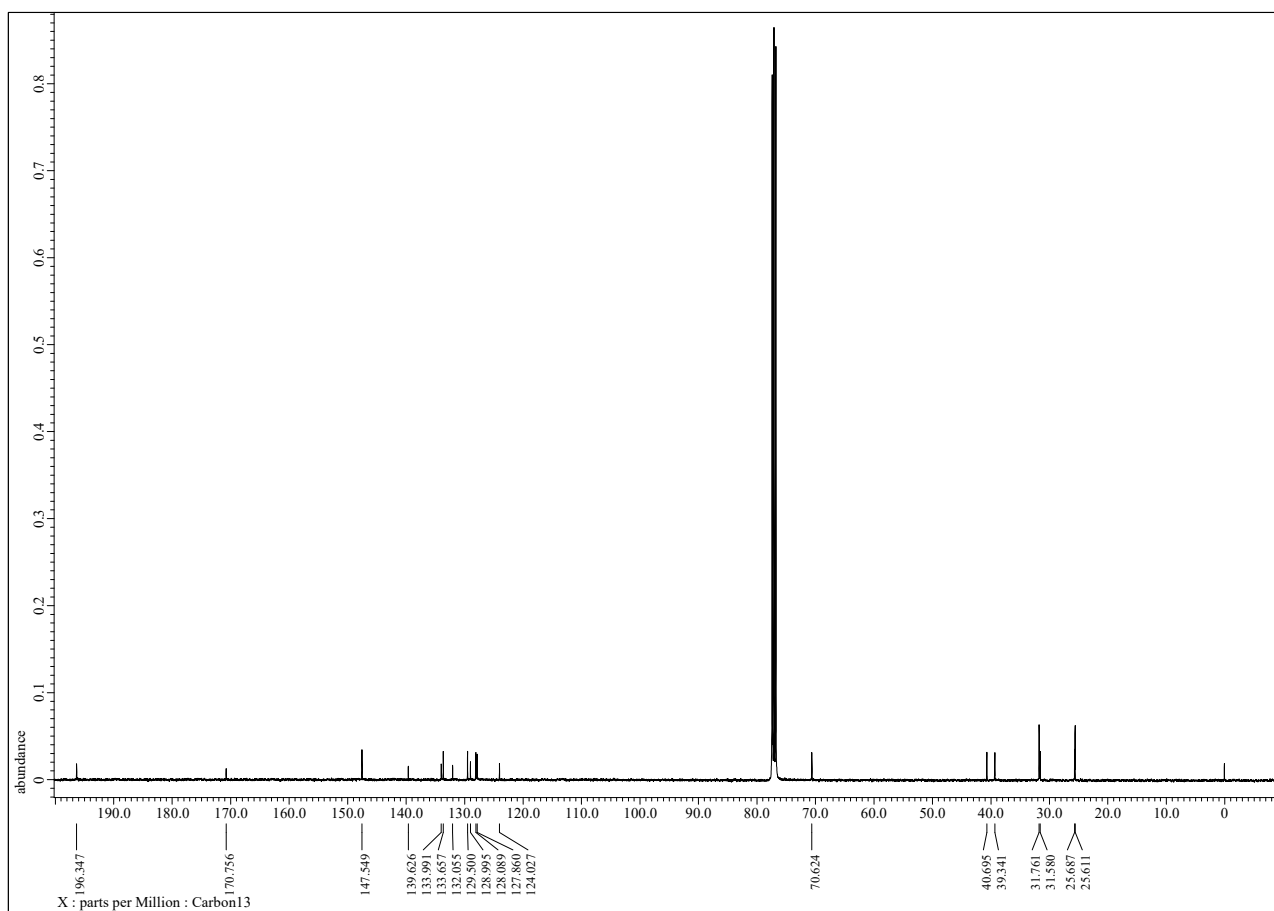



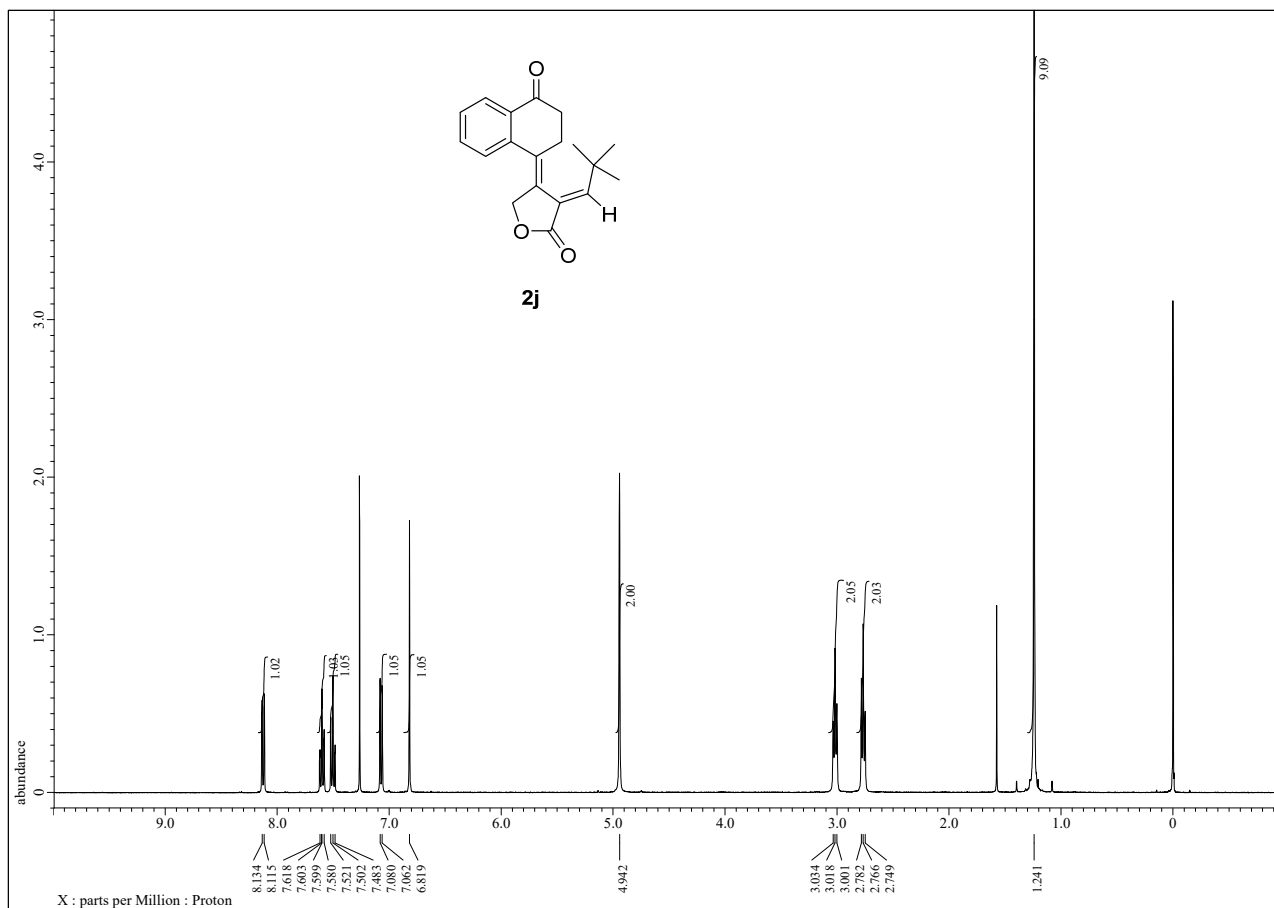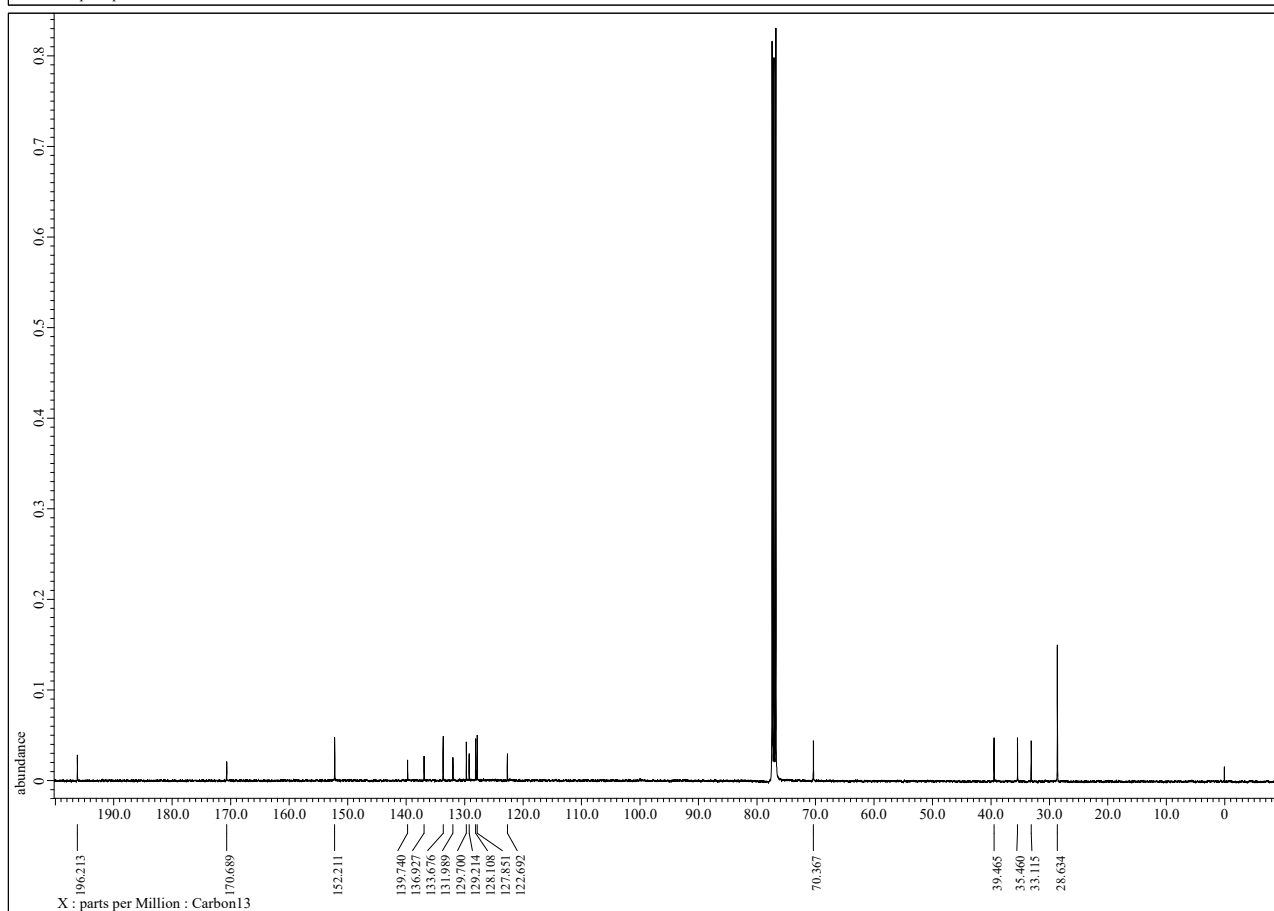

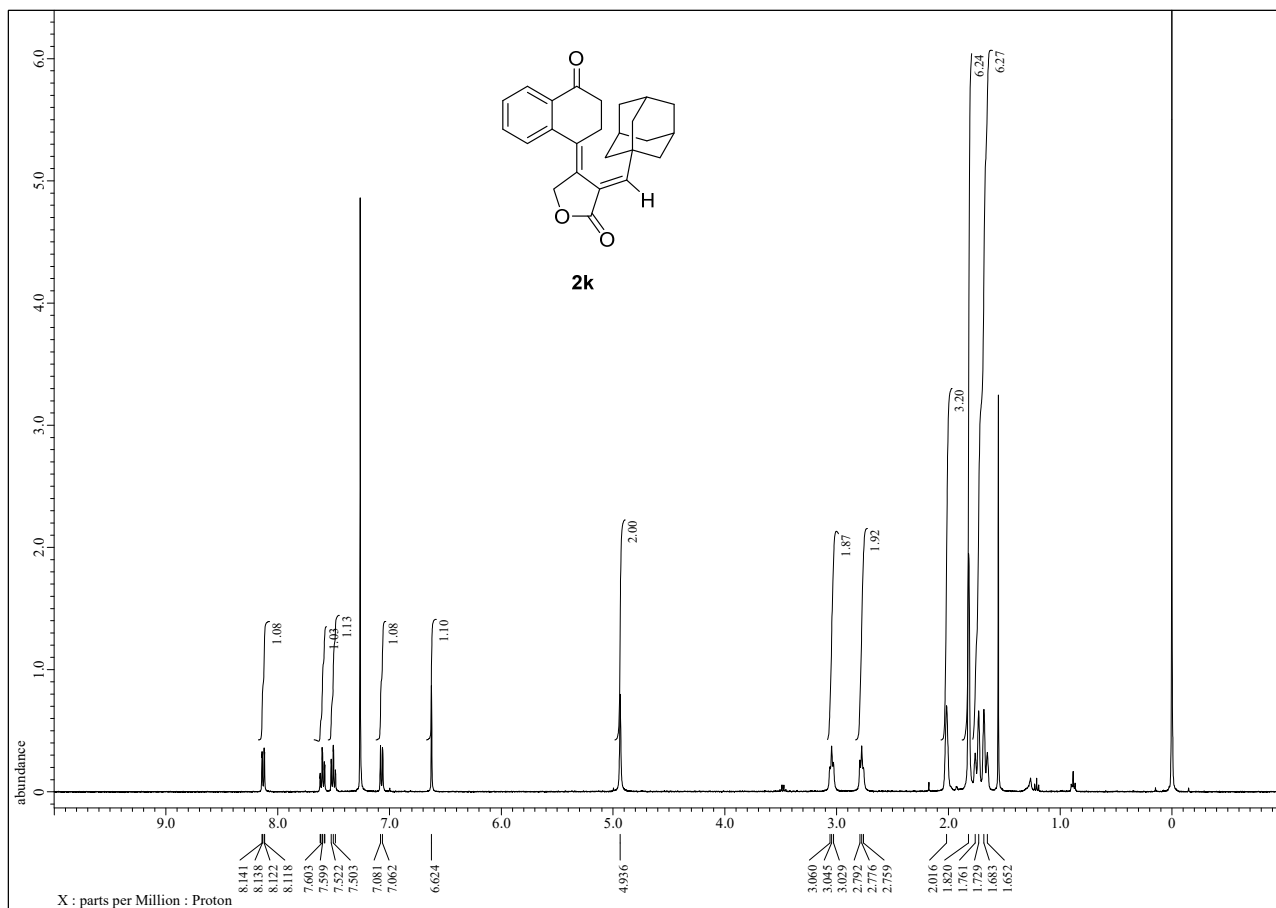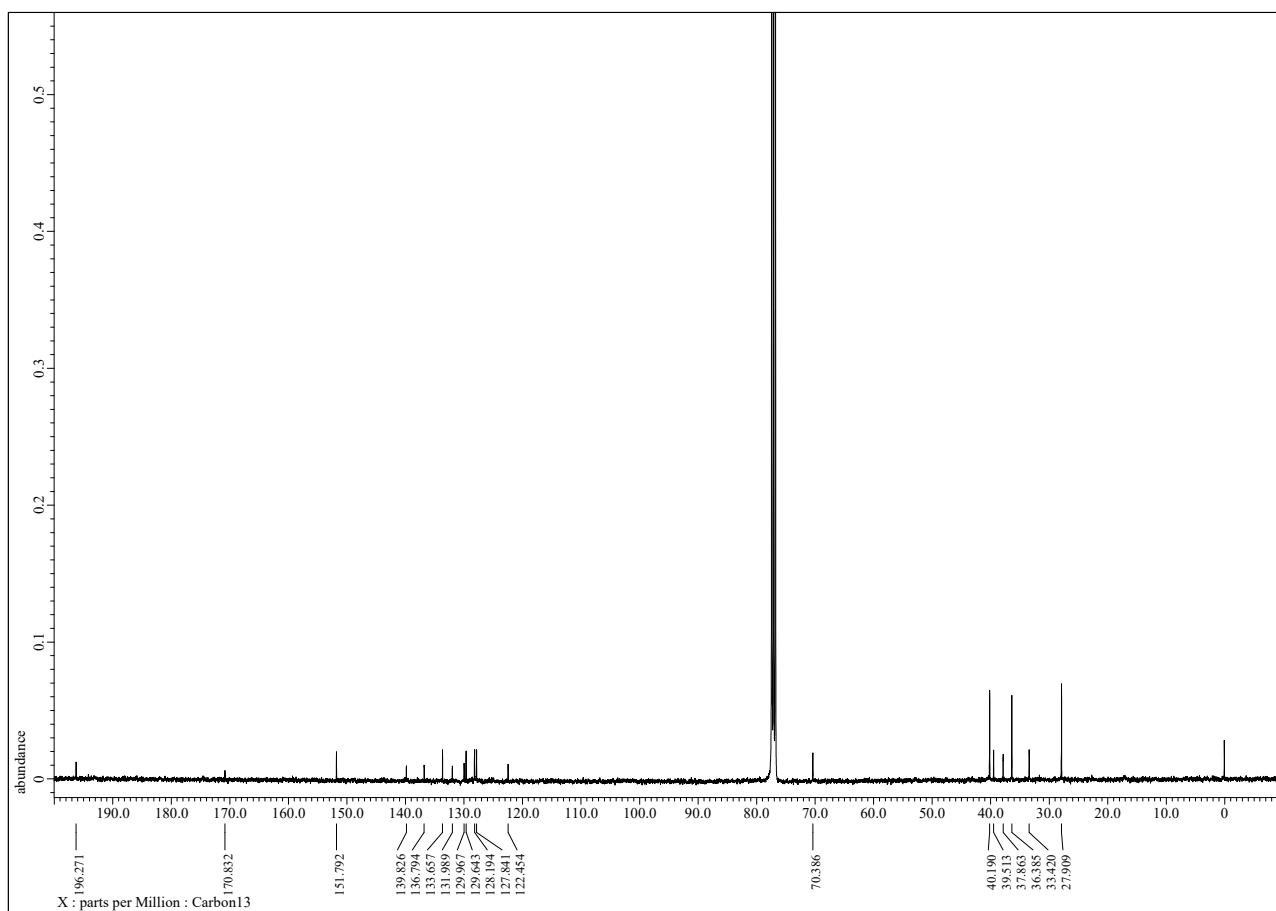

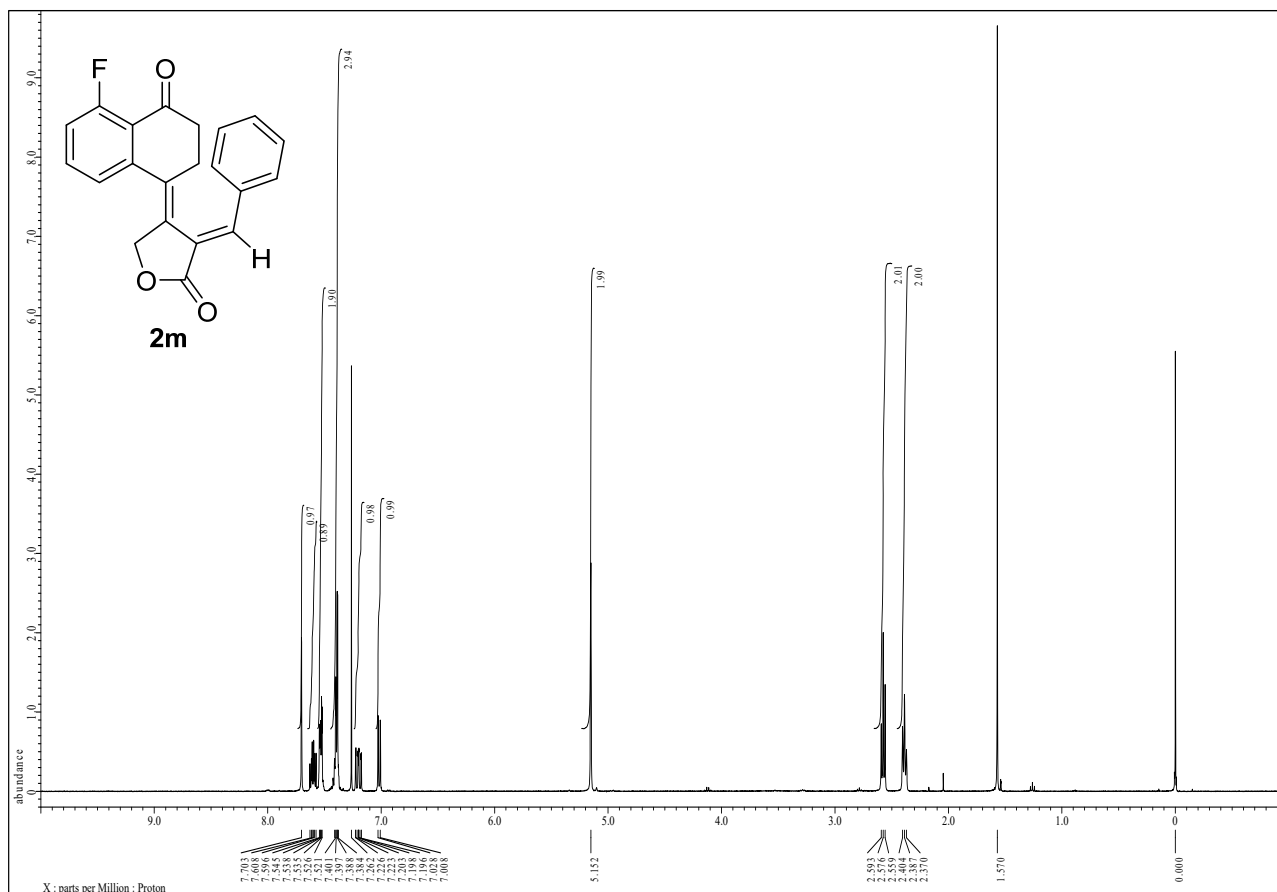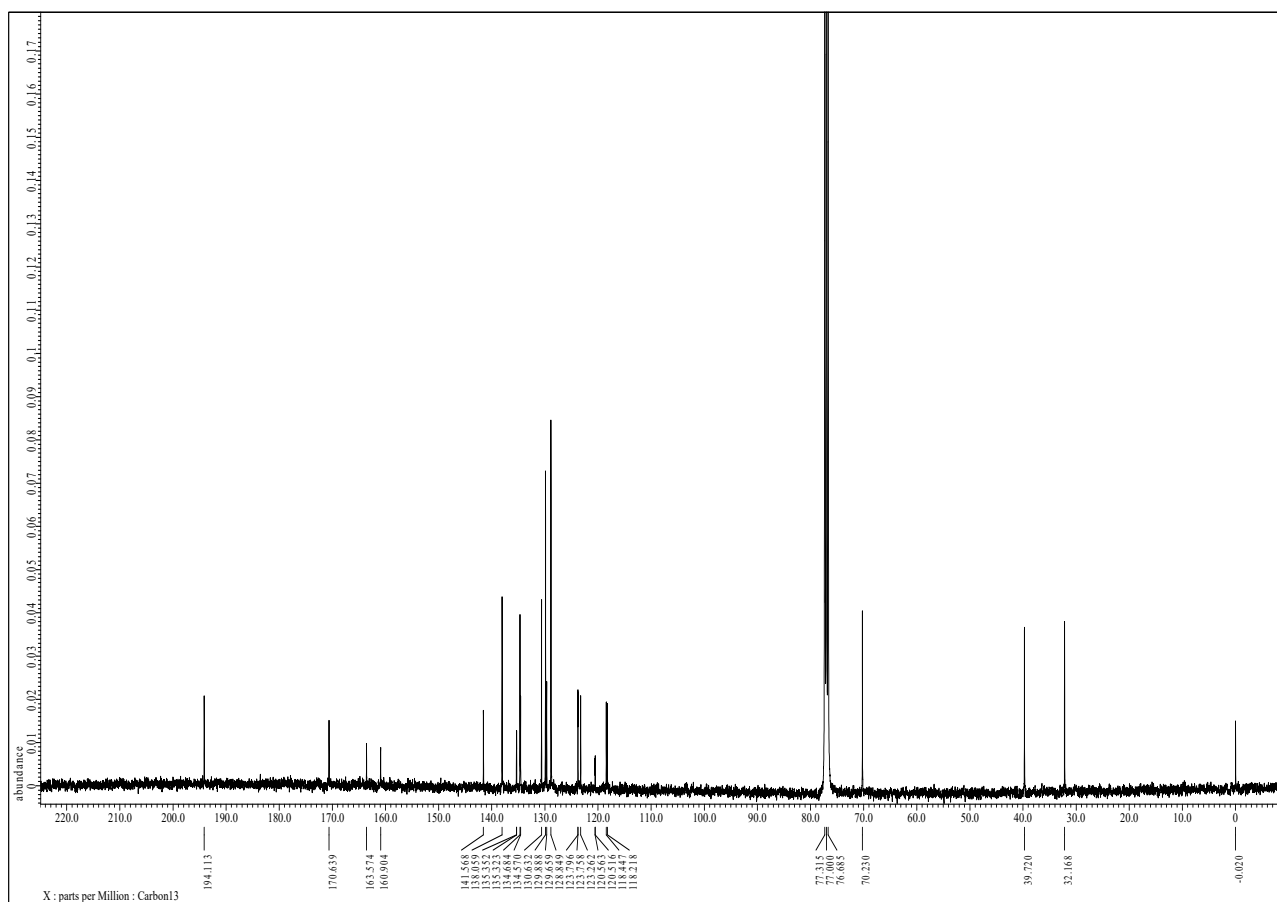

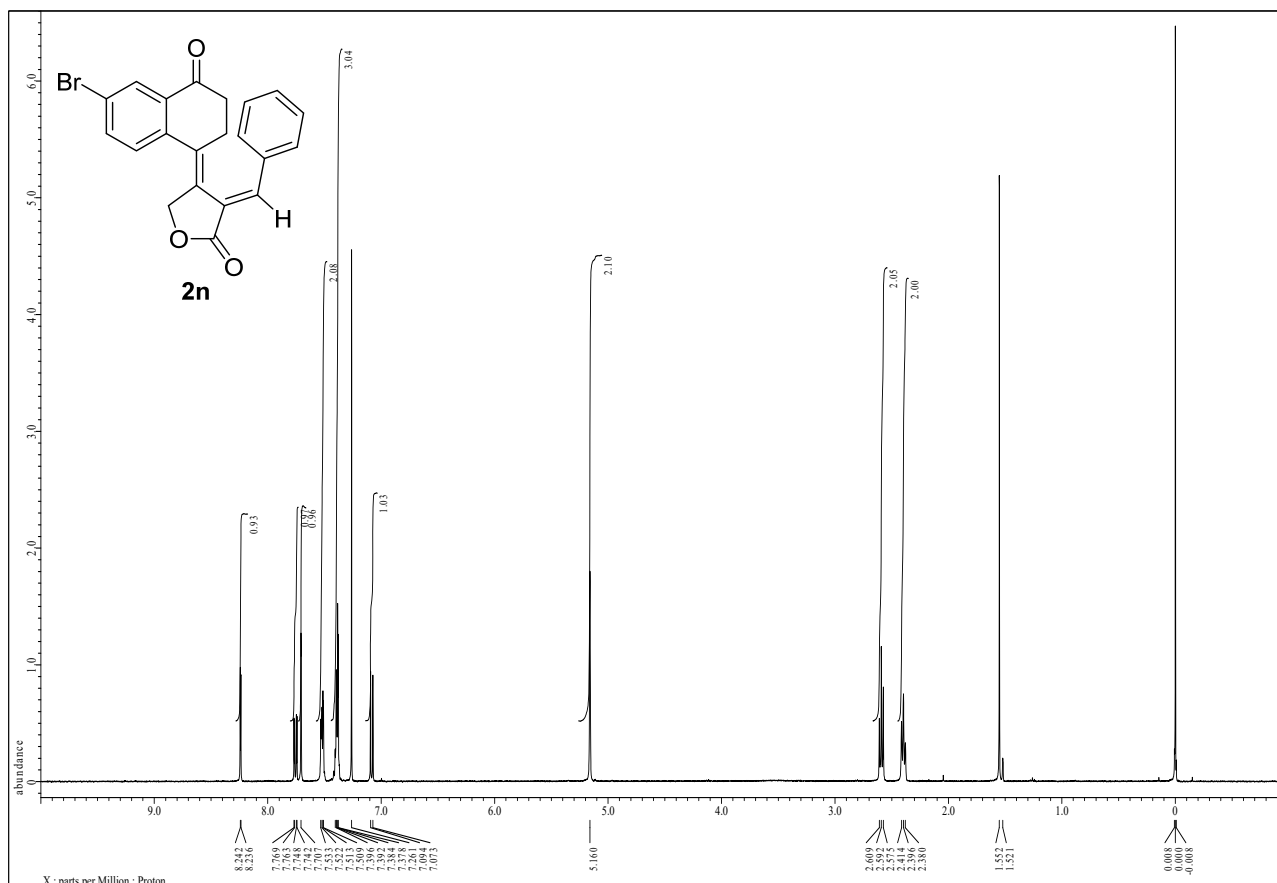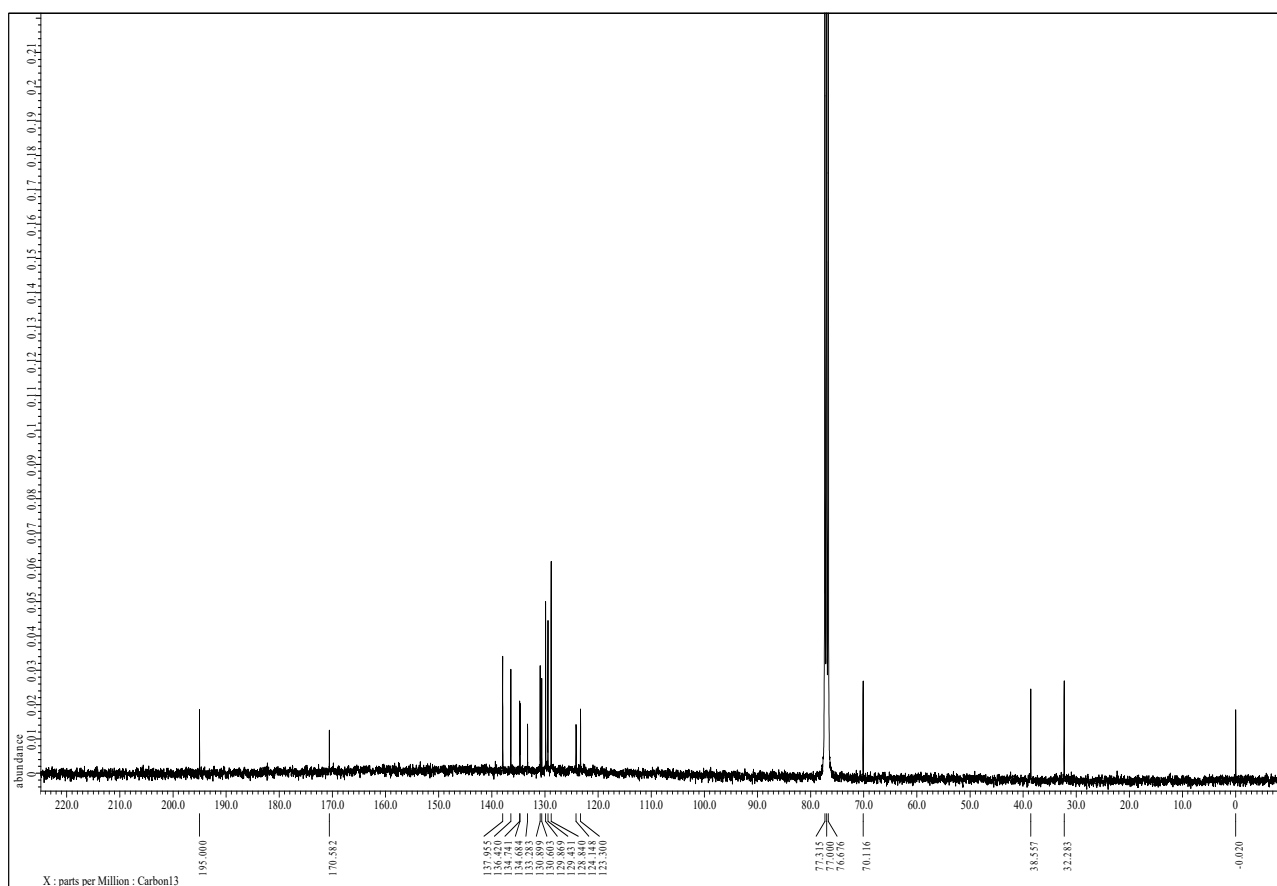

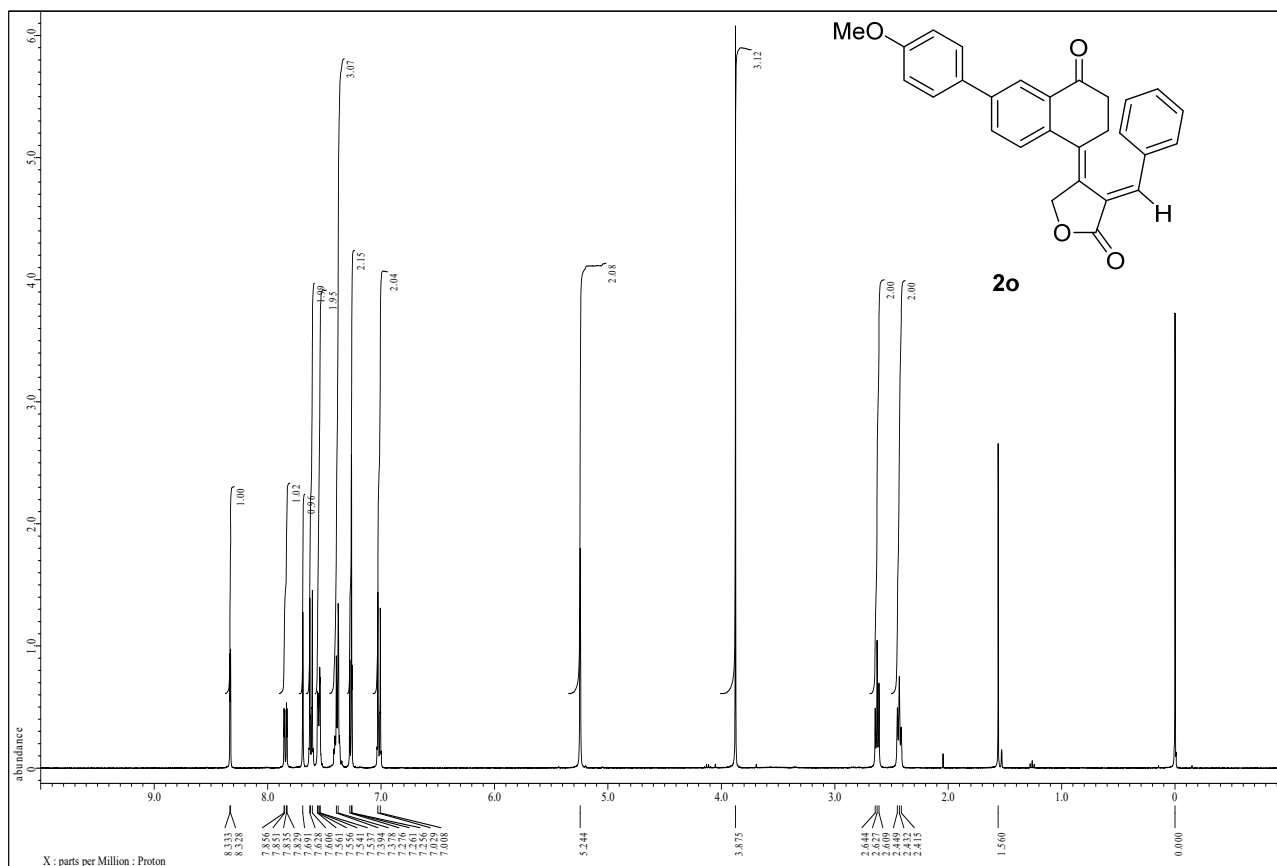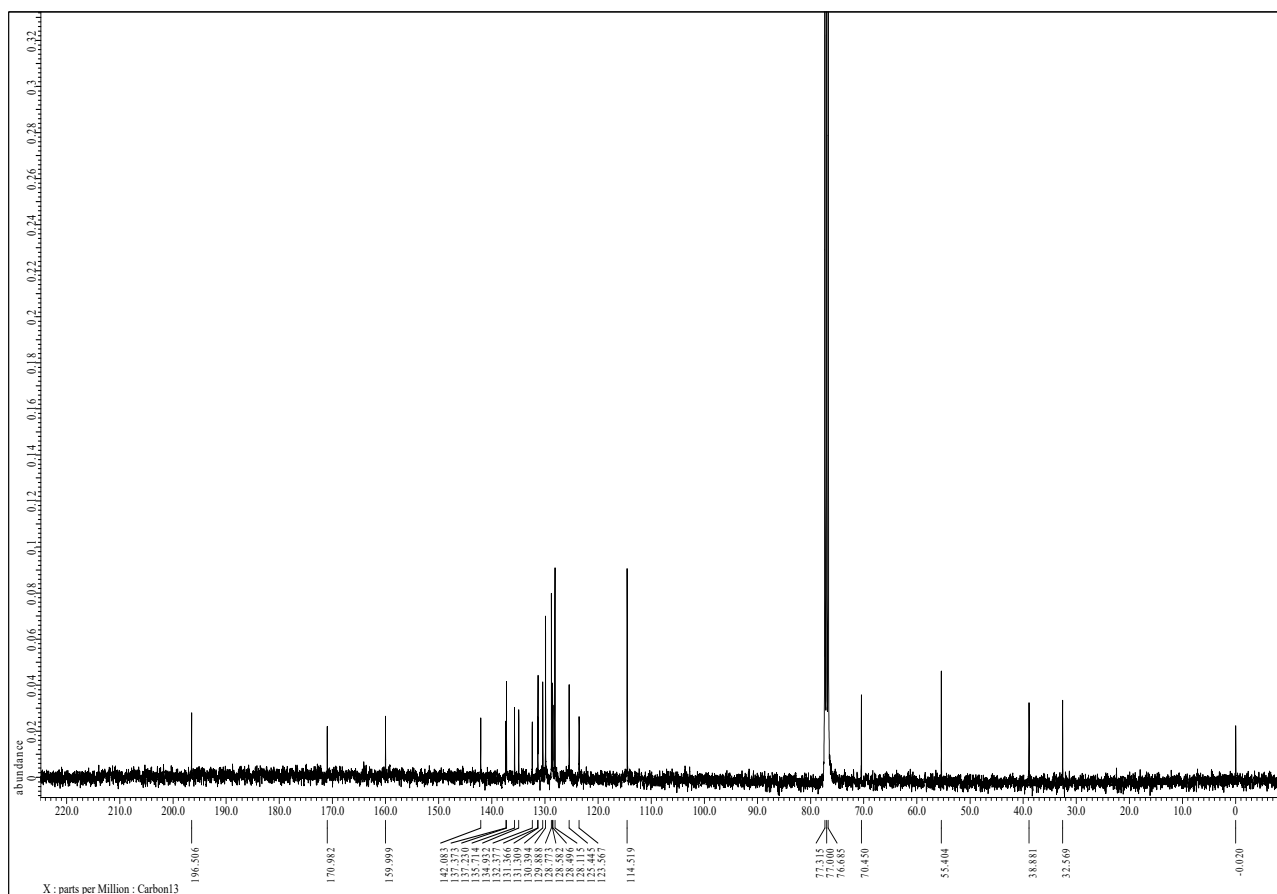

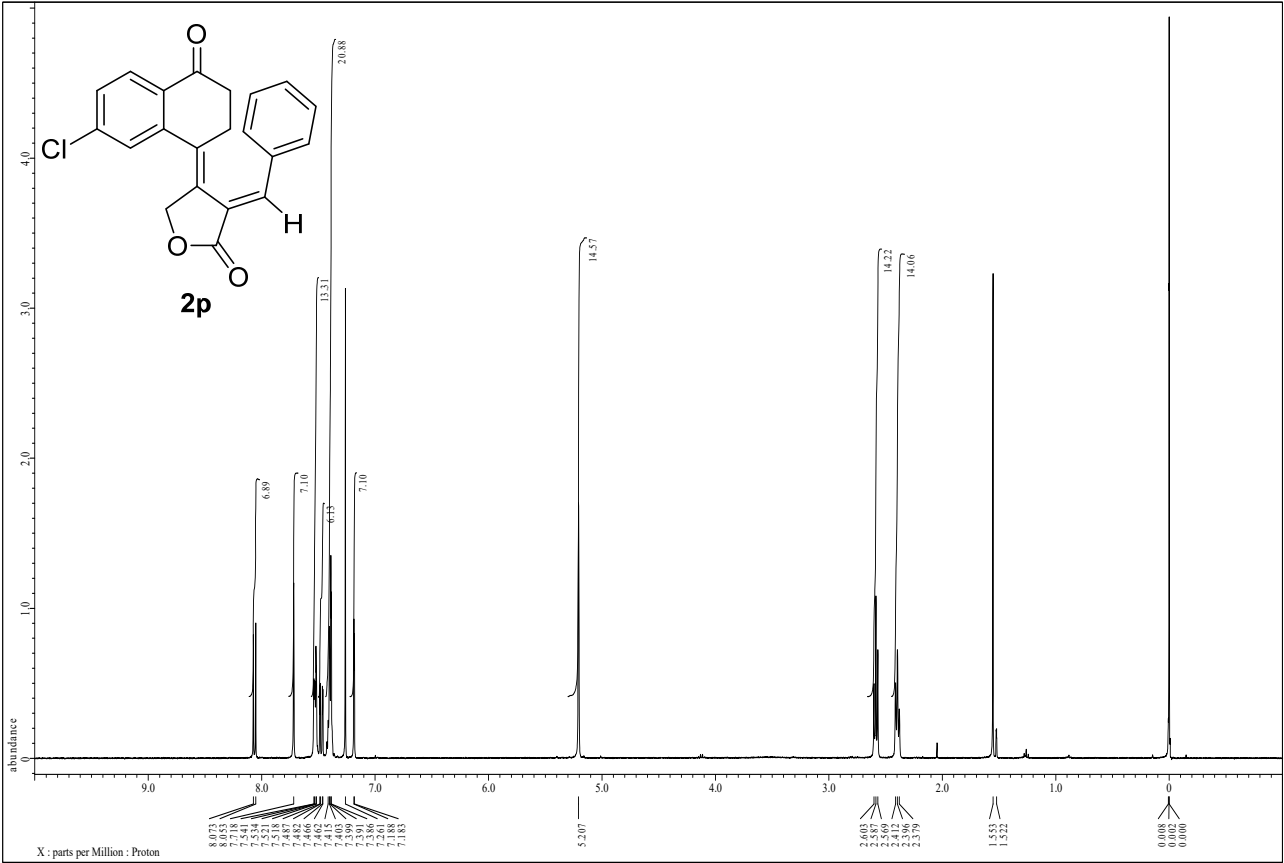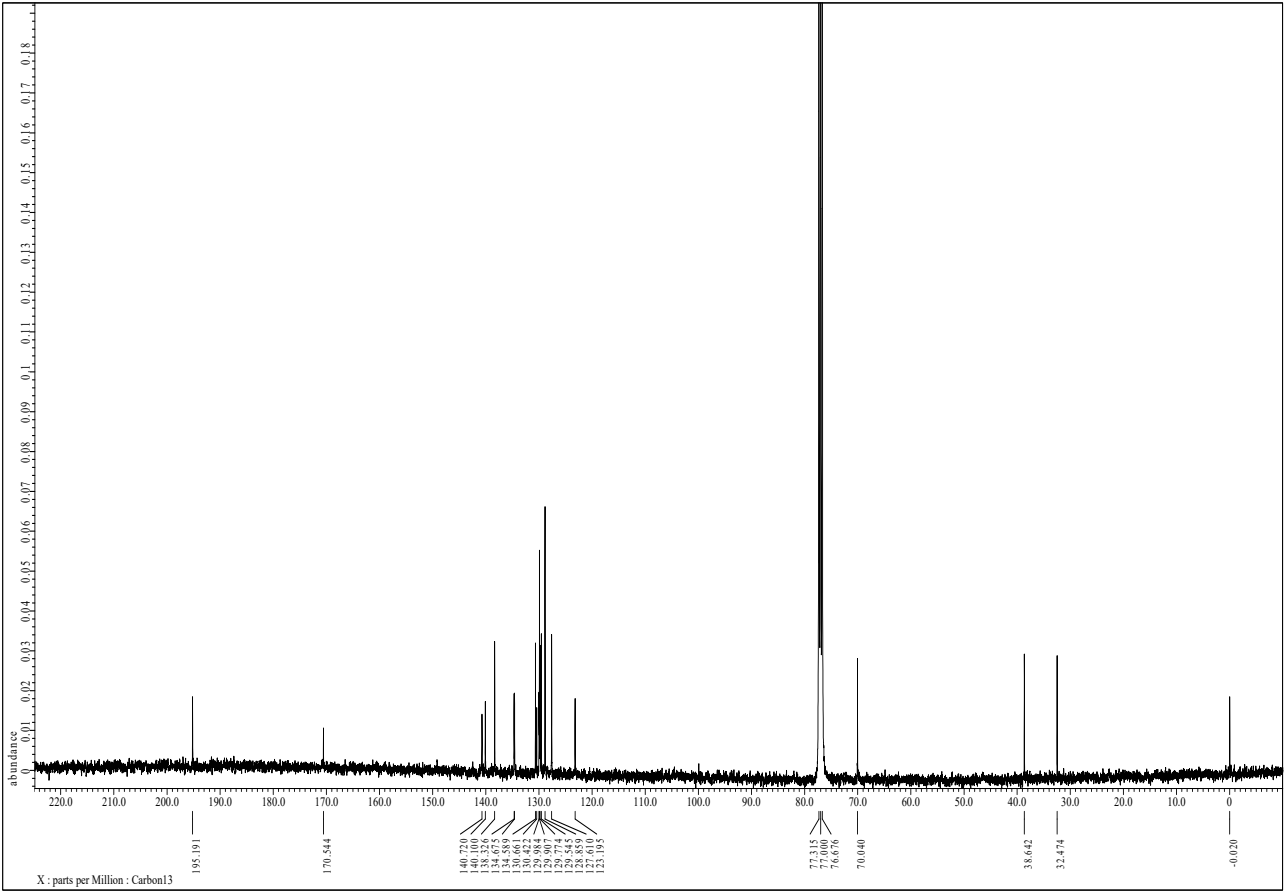

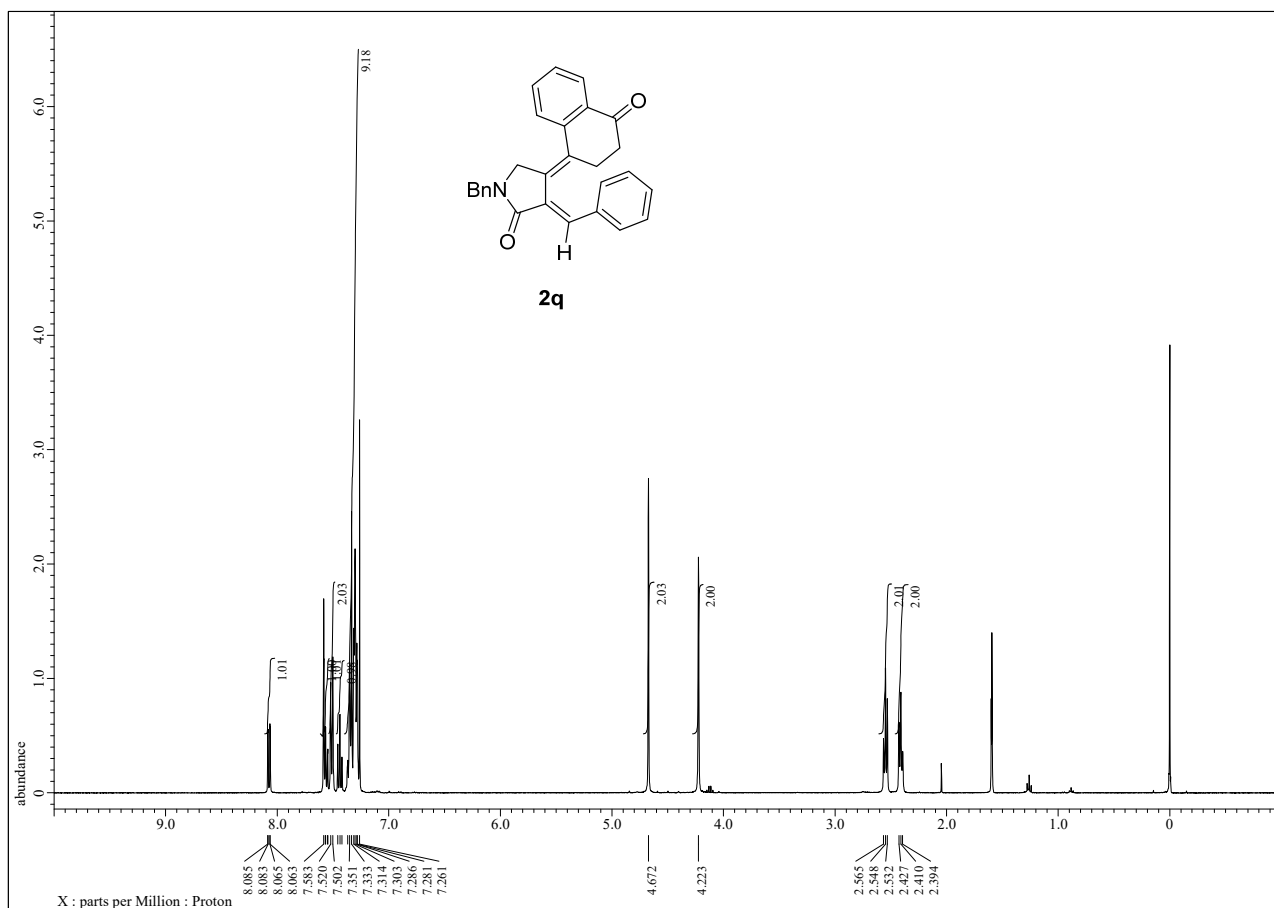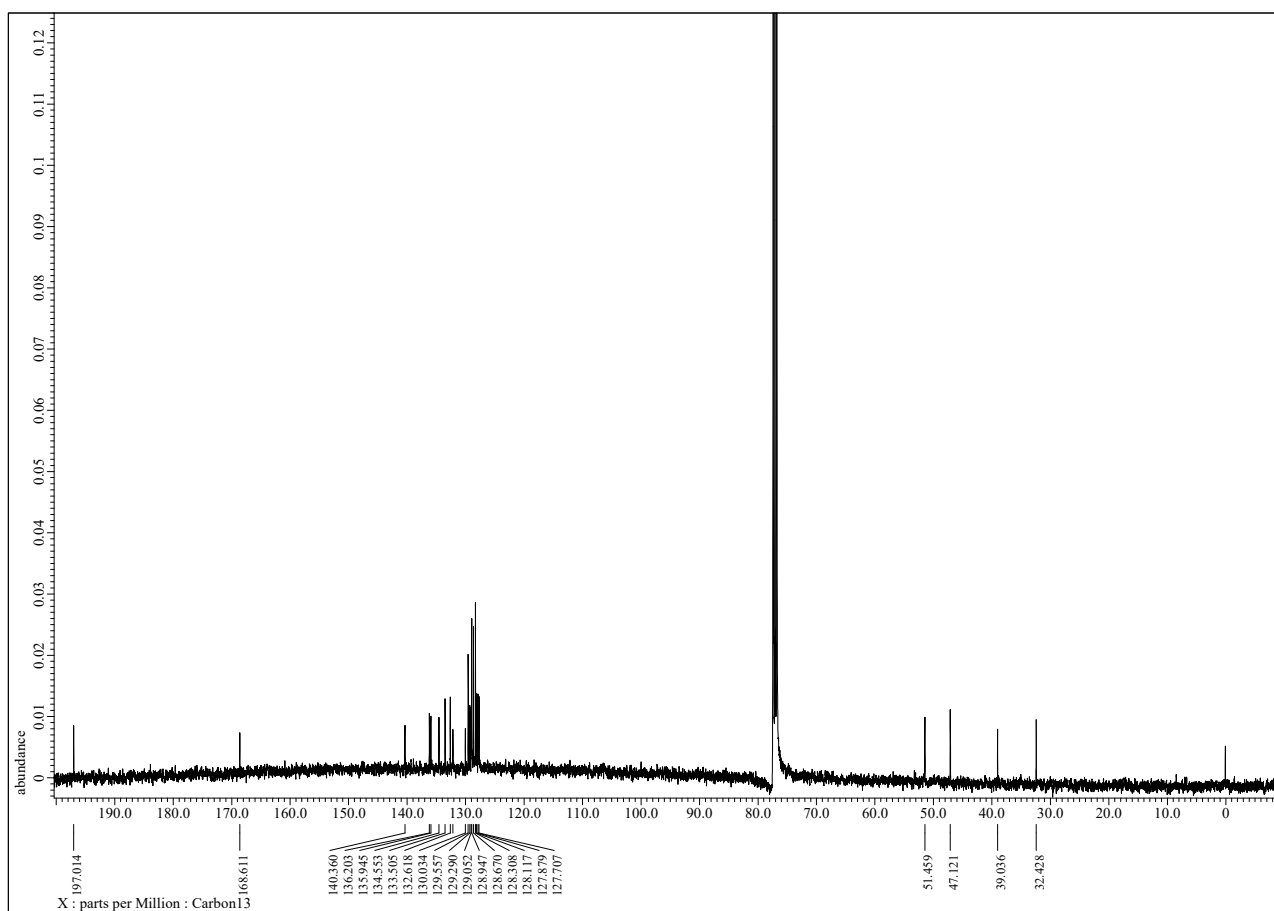

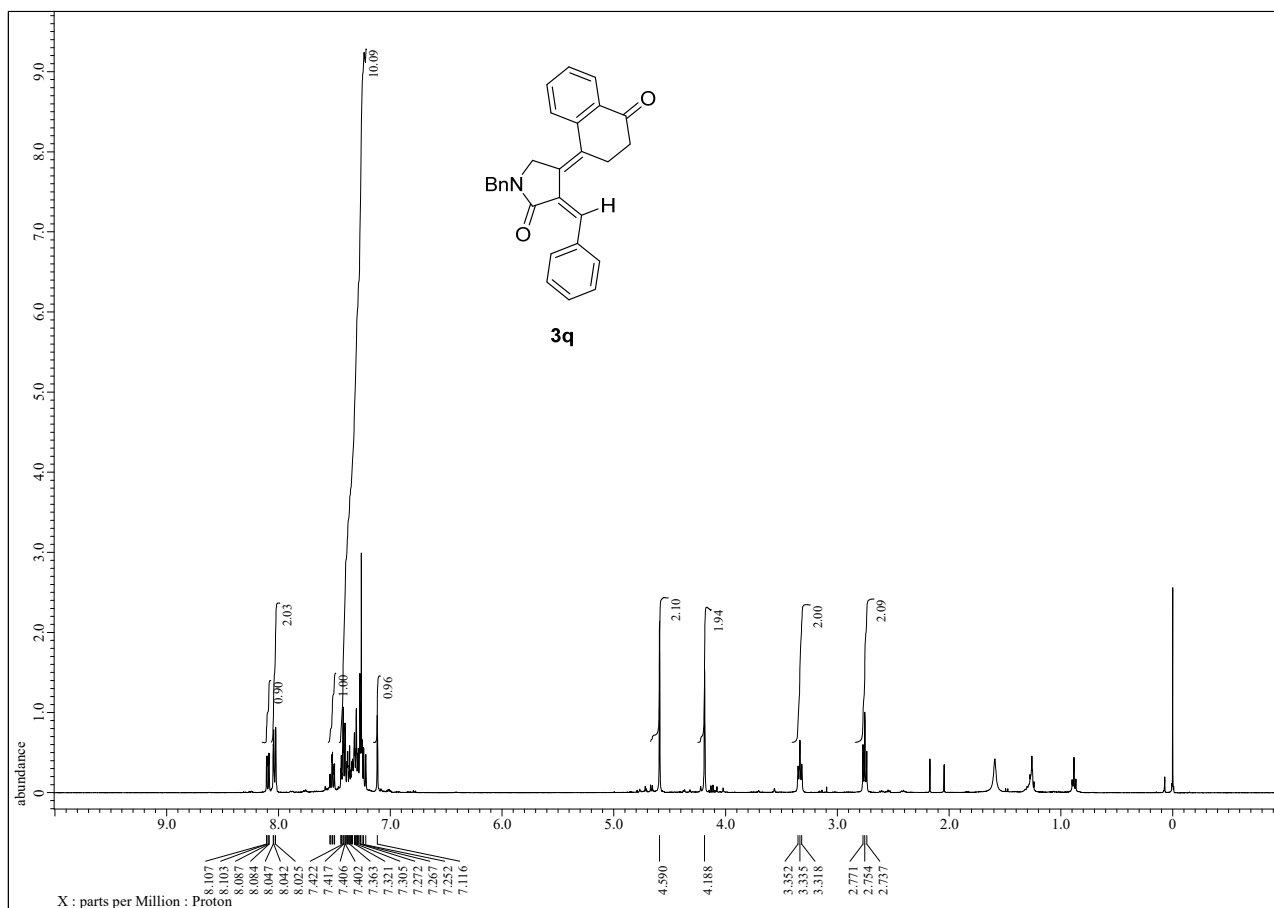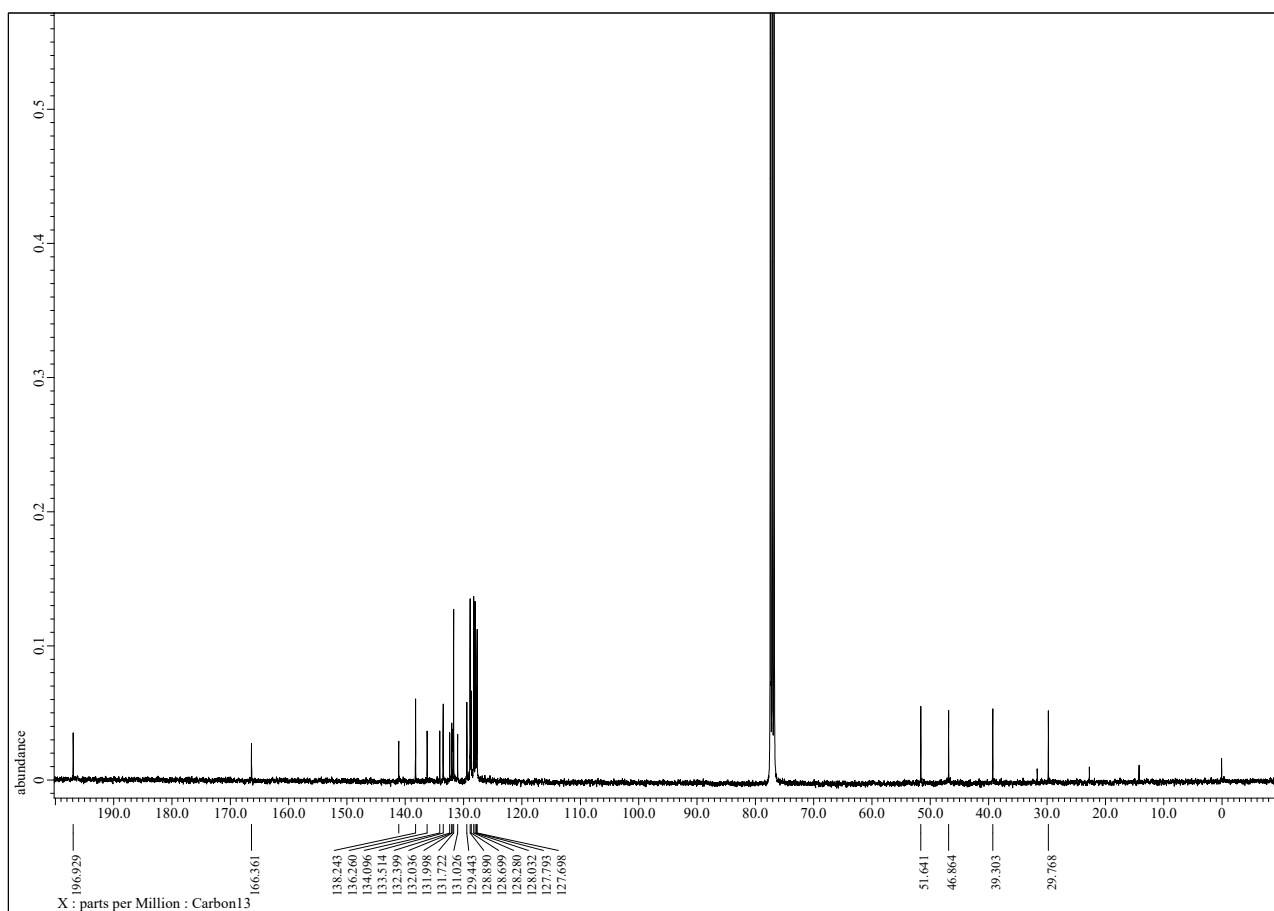



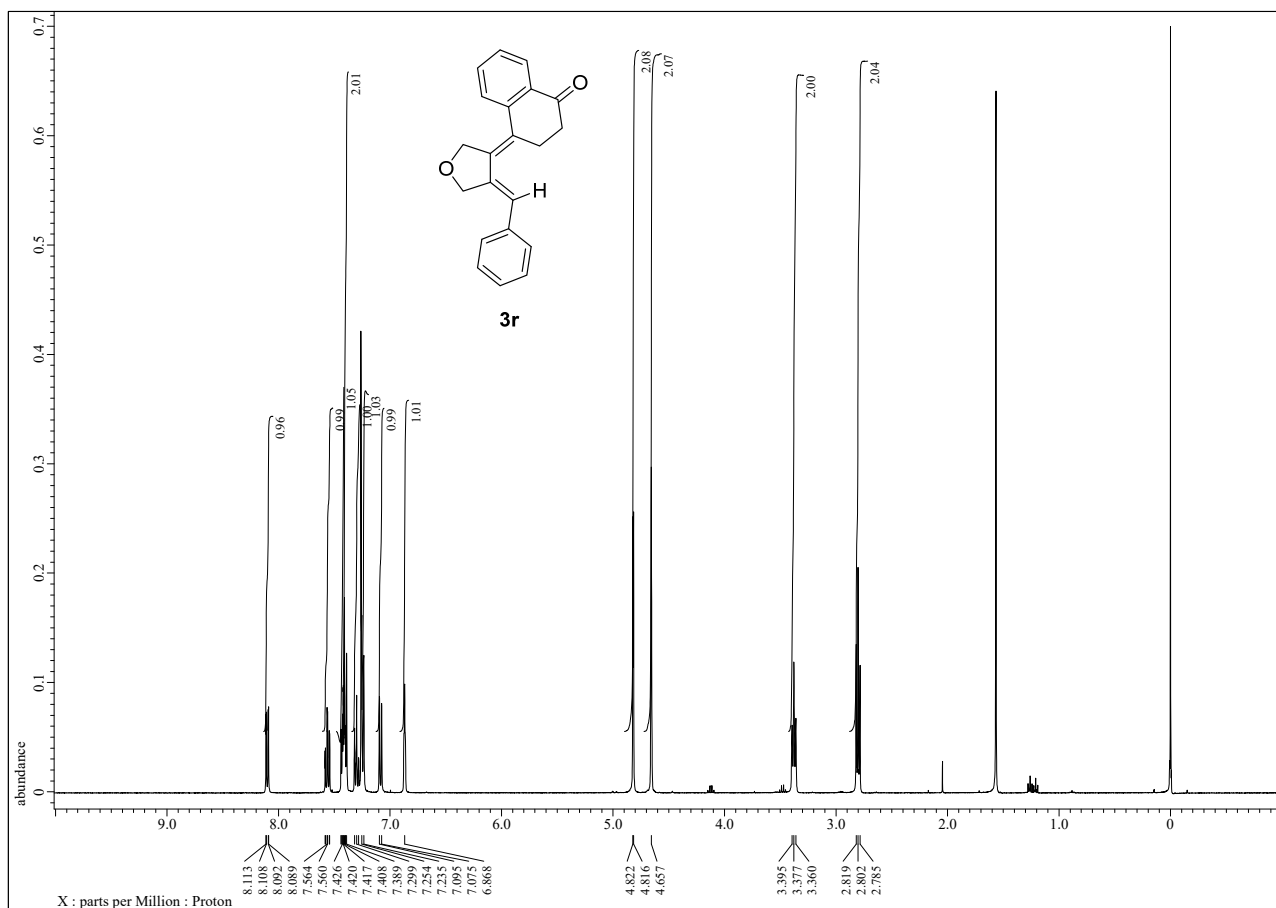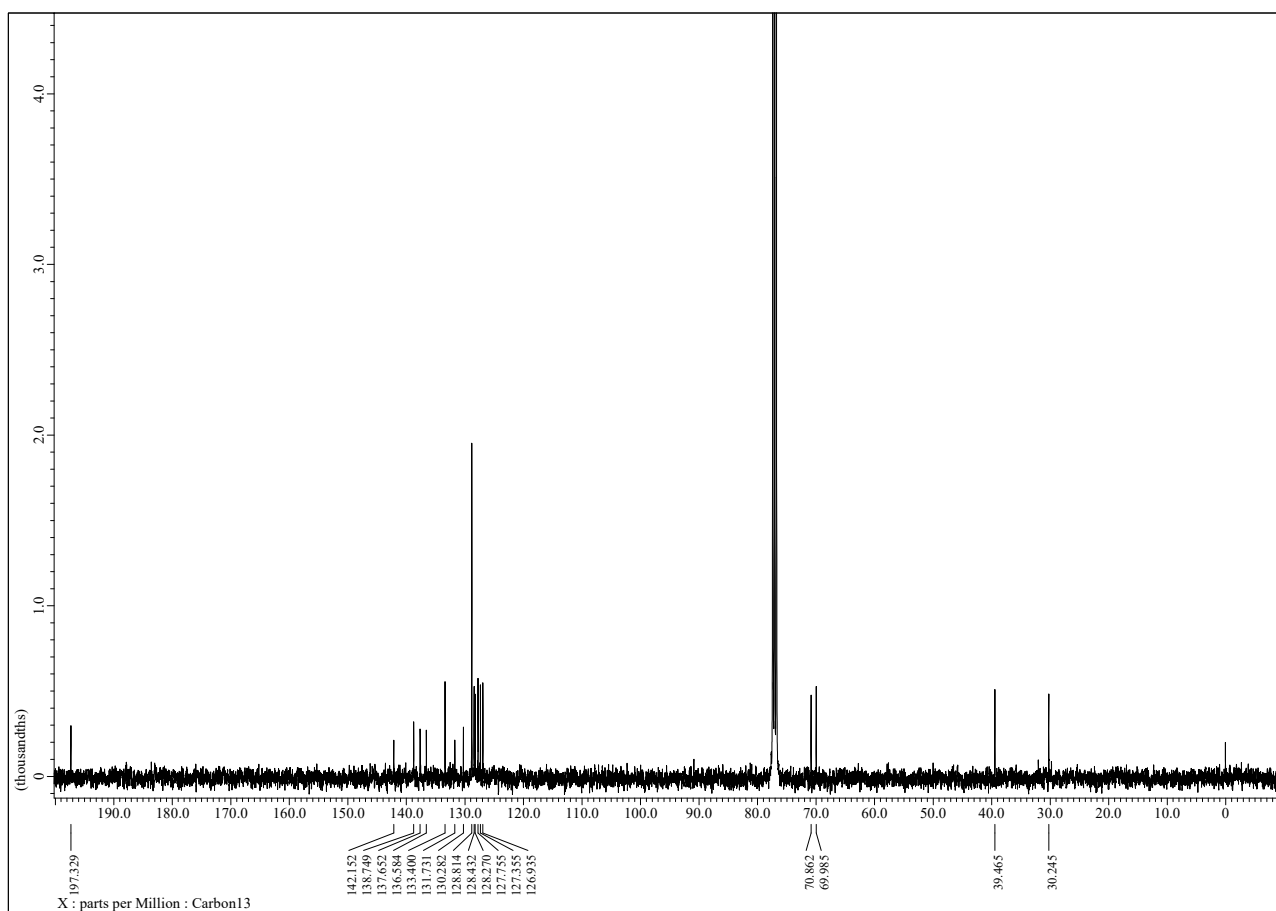

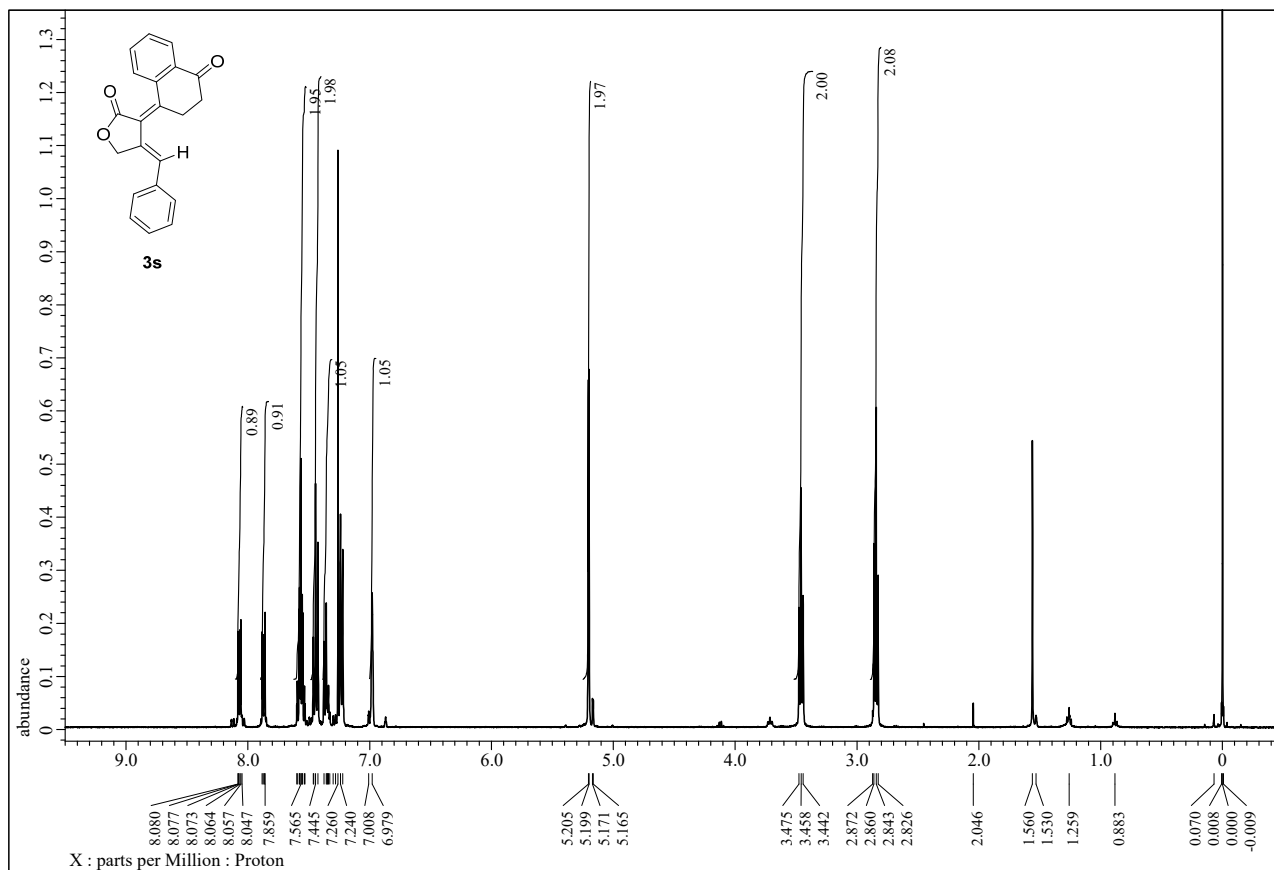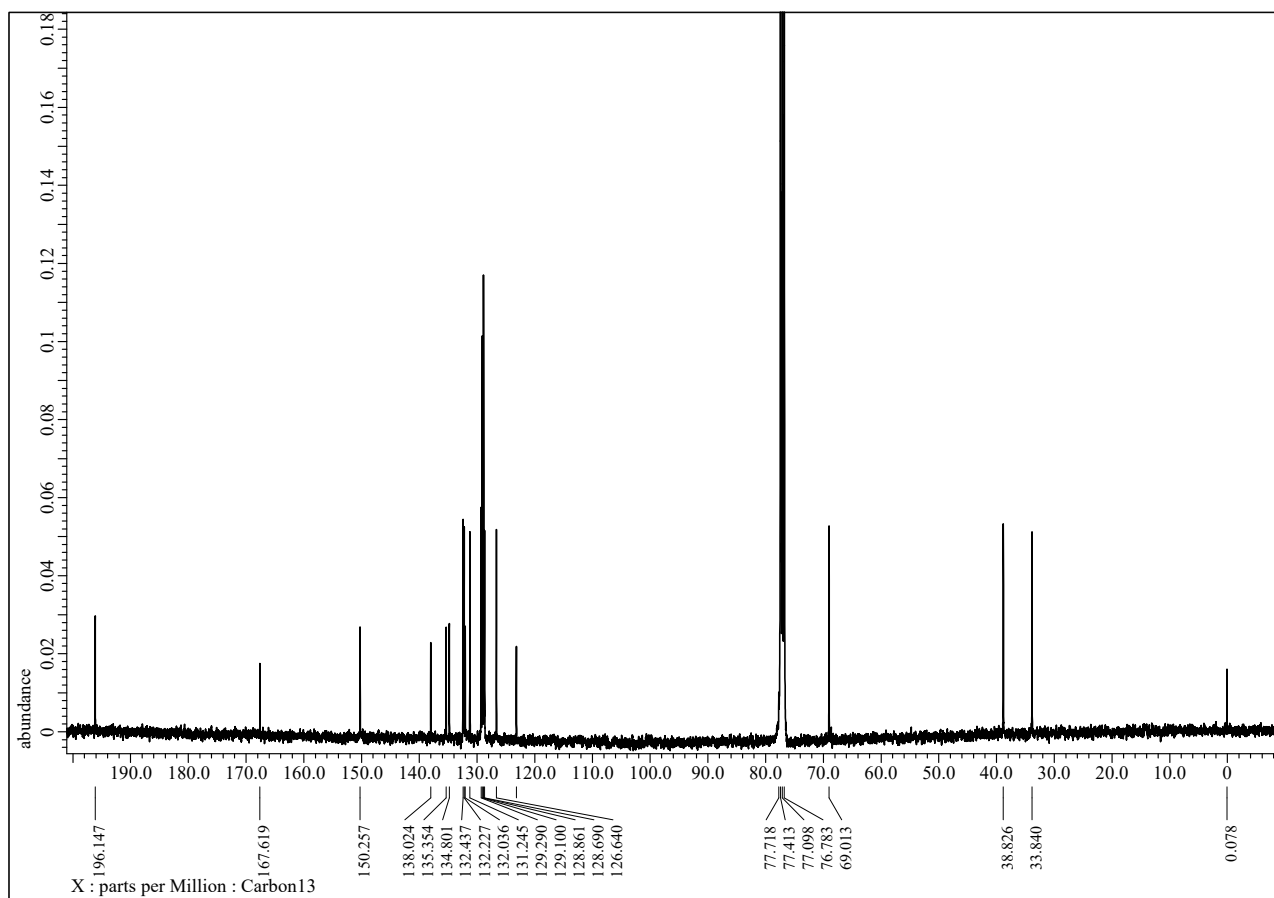

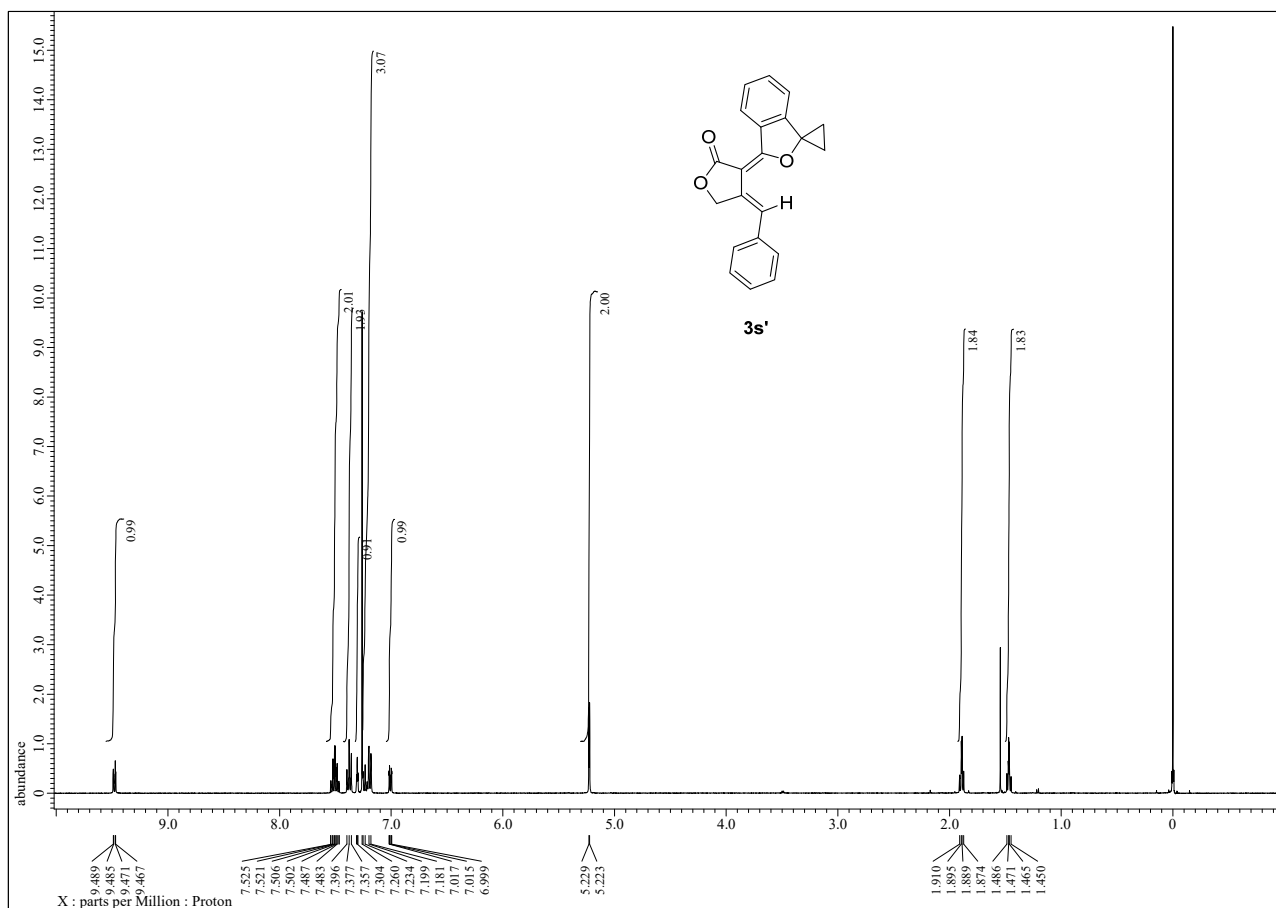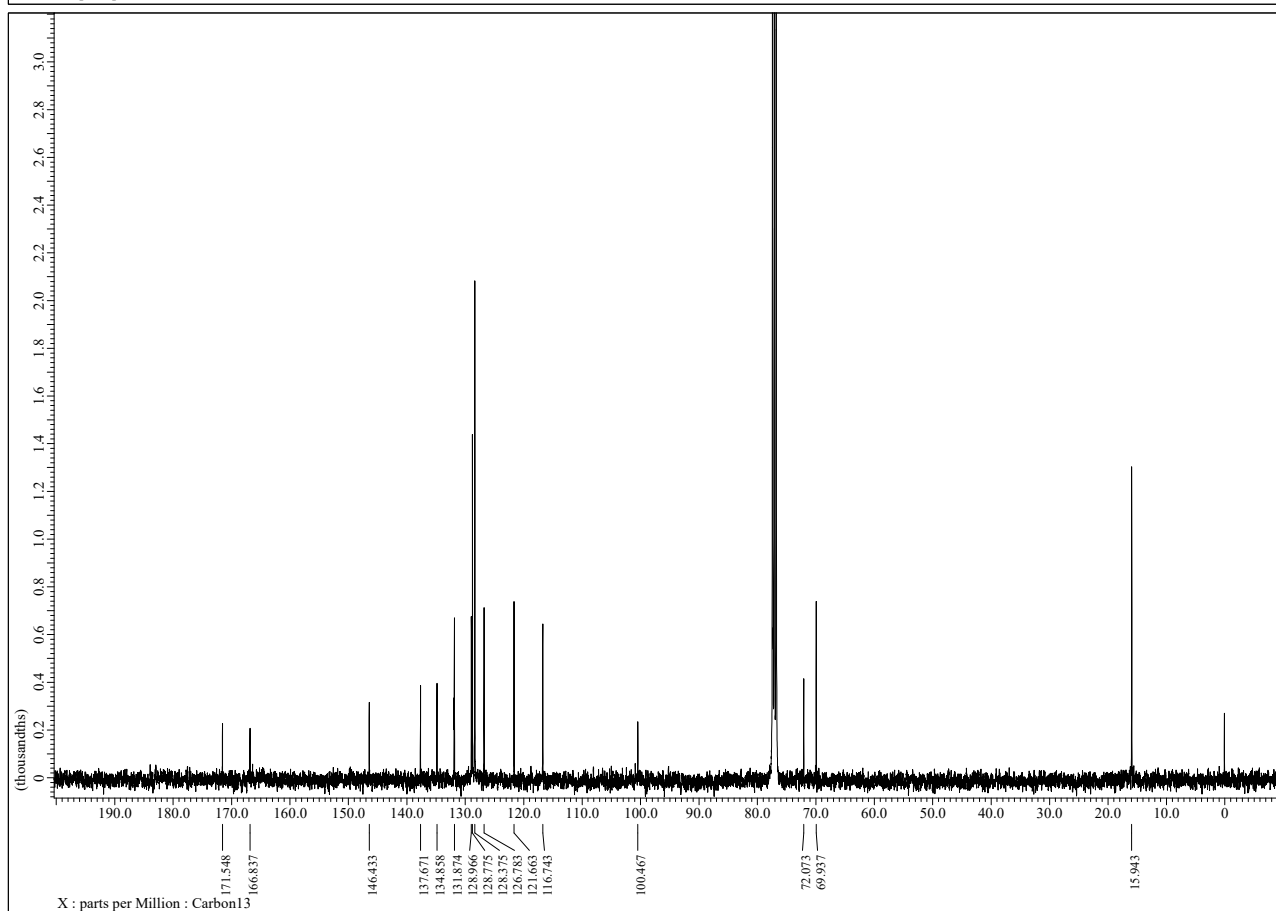

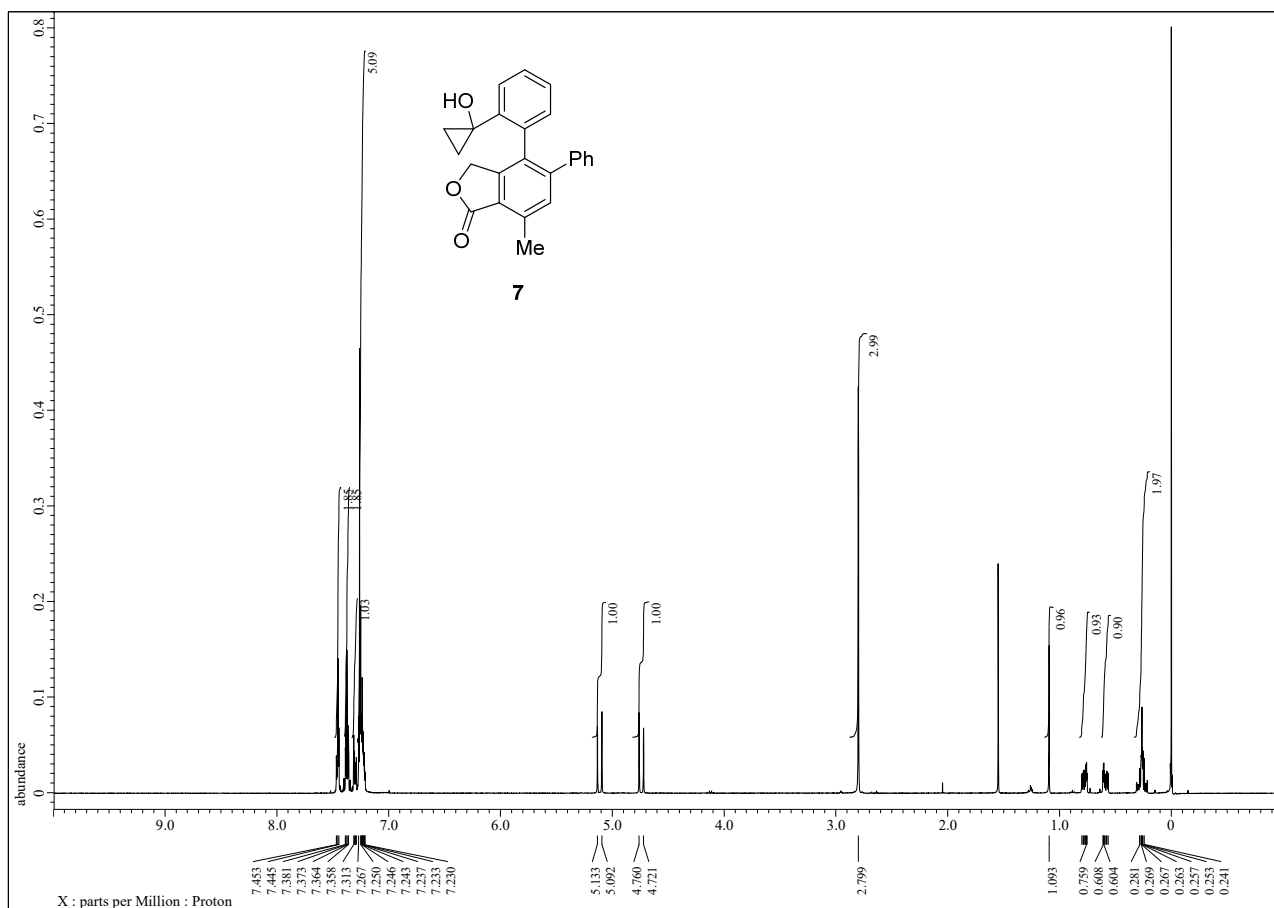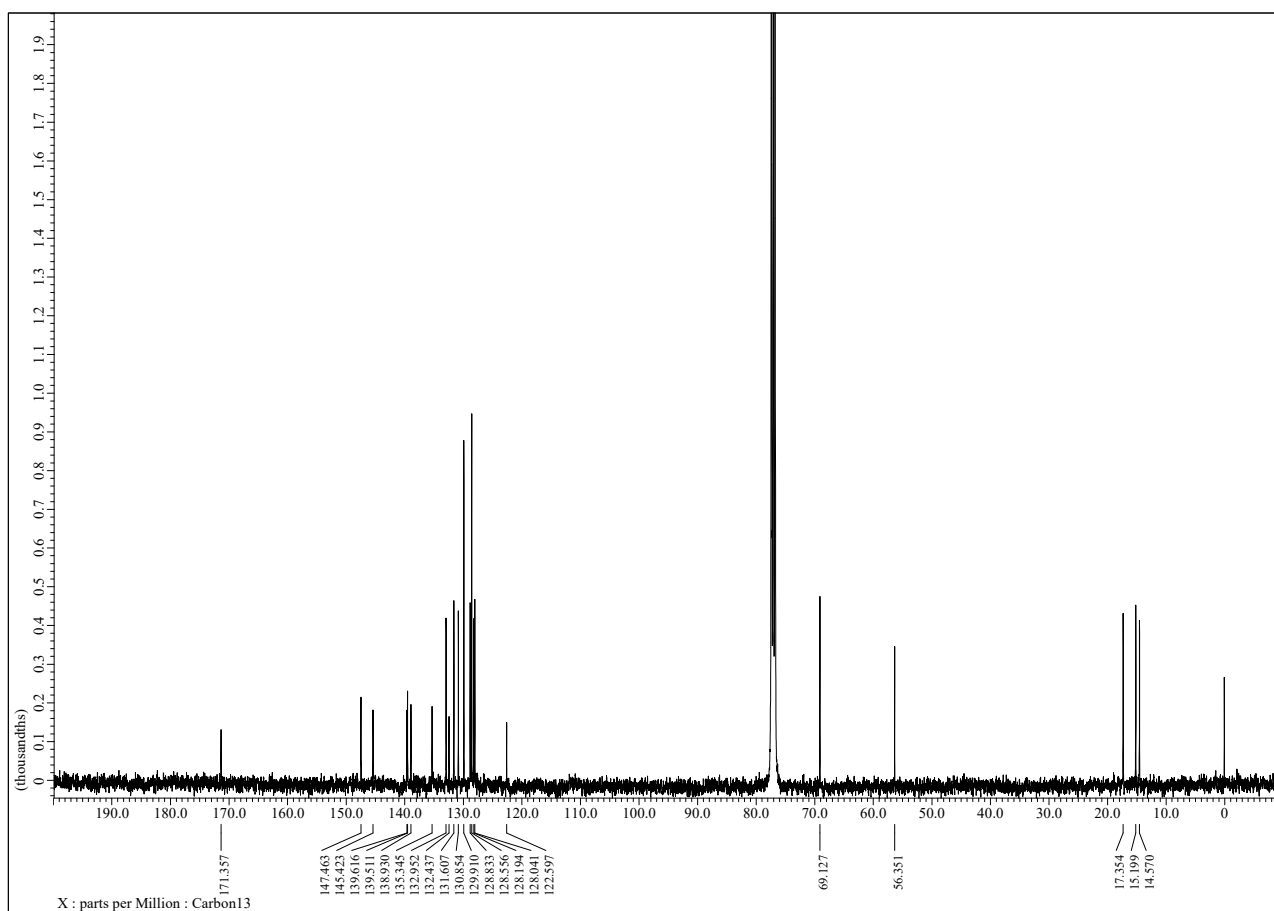

Supplement: d0cc05429a2.pdf [file d0cc05429a2.pdf]
